# Supplementary material for: Homo/Hetero-Dimers of Aromatic Bisabolane Sesquiterpenoids with Neuroprotective Activity from the Fungus Aspergillus versicolor A18 from South China Sea
Source: MDPI journal article supplement (doi:10.3390/md20050322), 2022-05-13
Supplement: s1 [file s1]

# Supporting Information

## **Homo/Hetero-Dimers of Aromatic Bisabolane Sesquiterpenoids with Neuroprotective Activity from the Fungus *Aspergillus versicolor* A18 from South China Sea**

**Han-Zhuang Weng<sup>1</sup>, Jun-Yu Zhu<sup>1</sup>, Fang-Yu Yuan<sup>1</sup>, Zhuo-Ya Tang<sup>1</sup>, Xiao-Qing Tian<sup>2</sup>, Ye Chen<sup>1</sup>, Cheng-Qi Fan<sup>2,\*</sup>, Gui-Hua Tang<sup>1,\*</sup> and Sheng Yin<sup>1</sup>**

<sup>1</sup> School of Pharmaceutical Sciences, Sun Yat-sen University, Guangzhou, Guangdong 510006, China;  
wengzh@mail2.sysu.edu.cn (H-Z. Weng); zhuji76@mail2.sysu.edu.cn (J-Y Zhu); yuanfy@mail2.sysu.edu.cn (F-Y.  
Yuan); tangzhy23@mail2.sysu.edu.cn (Z-Y. Tang); chenye8@mail.sysu.edu.cn (Y. Chen); yinsh2@mail.sysu.edu.cn  
(S. Yin);

<sup>2</sup> East China Sea Fisheries Research Institute, Chinese Academy of Fishery Sciences, Shanghai 200090, China;  
amytian0904@126.com (X.-Q. Tian)

\* Correspondence: tanggh5@mail.sysu.edu.cn (G-H. Tang); fancq@ecsf.ac.cn (C-Q. Fan)

## Table of Contents

|                                                                                                                          |    |
|--------------------------------------------------------------------------------------------------------------------------|----|
| <b>Table S1.</b> NMR data for compound <b>1</b> in CDCl <sub>3</sub> (δ in ppm) .....                                    | 4  |
| <b>Table S2.</b> NMR data for compound <b>2</b> in CDCl <sub>3</sub> (δ in ppm) .....                                    | 5  |
| <b>Table S3.</b> NMR data for compound <b>3</b> in CDCl <sub>3</sub> (δ in ppm) .....                                    | 6  |
| <b>Table S4.</b> NMR data for compound <b>4</b> in CDCl <sub>3</sub> (δ in ppm) .....                                    | 7  |
| <b>Table S5.</b> NMR data for compound <b>5</b> in CDCl <sub>3</sub> (δ in ppm) .....                                    | 8  |
| <b>Table S6.</b> NMR data for compounds <b>6</b> and <b>7</b> in CDCl <sub>3</sub> (δ in ppm) .....                      | 9  |
| <b>Table S7.</b> NMR data for compound <b>8</b> in CDCl <sub>3</sub> (δ in ppm) .....                                    | 10 |
| <b>Table S8.</b> NMR data for compounds <b>9</b> and <b>10</b> in CDCl <sub>3</sub> (δ in ppm) .....                     | 11 |
| <b>Table S9.</b> NMR data for compounds <b>12</b> and <b>13</b> (δ in ppm) .....                                         | 12 |
| <b>Table S10.</b> NMR data for compounds <b>14</b> and <b>15</b> (δ in ppm) .....                                        | 13 |
| <b>Figure S1.</b> ECD Spectra of Compounds <b>2–4</b> and <b>12</b> .....                                                | 13 |
| <b>Figure S2.</b> <sup>1</sup> H NMR (500 MHz, CDCl <sub>3</sub> ) spectrum of compound <b>1a</b> .....                  | 14 |
| <b>Figure S3.</b> <sup>13</sup> C NMR (125 MHz, CDCl <sub>3</sub> ) spectrum of compound <b>1a</b> .....                 | 15 |
| <b>Figure S4.</b> <sup>1</sup> H NMR (500 MHz, CDCl <sub>3</sub> ) spectrum of compound <b>1b</b> .....                  | 16 |
| <b>Figure S5.</b> <sup>13</sup> C NMR (125 MHz, CDCl <sub>3</sub> ) spectrum of compound <b>1b</b> .....                 | 17 |
| <b>Figure S6.</b> HSQC (500 MHz, CDCl <sub>3</sub> ) spectrum of compound <b>1b</b> .....                                | 18 |
| <b>Figure S7.</b> <sup>1</sup> H- <sup>1</sup> H COSY (500 MHz, CDCl <sub>3</sub> ) spectrum of compound <b>1b</b> ..... | 19 |
| <b>Figure S8.</b> HMBC (500 MHz, CDCl <sub>3</sub> ) spectrum of compound <b>1b</b> .....                                | 20 |
| <b>Figure S9.</b> NOESY (500 MHz, CDCl <sub>3</sub> ) spectrum of compound <b>1b</b> .....                               | 21 |
| <b>Figure S10.</b> HR-ESI-MS (E+) spectrum of compound <b>1</b> .....                                                    | 22 |
| <b>Figure S11.</b> HR-ESI-MS (E-) spectrum of compound <b>1</b> .....                                                    | 23 |
| <b>Figure S12.</b> <sup>1</sup> H NMR (400 MHz, CDCl <sub>3</sub> ) spectrum of compound <b>2</b> .....                  | 24 |
| <b>Figure S13.</b> <sup>13</sup> C NMR (100 MHz, CDCl <sub>3</sub> ) spectrum of compound <b>2</b> .....                 | 25 |
| <b>Figure S14.</b> HSQC (400 MHz, CDCl <sub>3</sub> ) spectrum of compound <b>2</b> .....                                | 26 |
| <b>Figure S15.</b> <sup>1</sup> H- <sup>1</sup> H COSY (400 MHz, CDCl <sub>3</sub> ) spectrum of compound <b>2</b> ..... | 27 |
| <b>Figure S16.</b> HMBC (400 MHz, CDCl <sub>3</sub> ) spectrum of compound <b>2</b> .....                                | 28 |
| <b>Figure S17.</b> HR-ESI-MS spectrum of compound <b>2</b> .....                                                         | 29 |
| <b>Figure S18.</b> <sup>1</sup> H NMR (500 MHz, CDCl <sub>3</sub> ) spectrum of compound <b>3</b> .....                  | 30 |
| <b>Figure S19.</b> <sup>13</sup> C NMR (125 MHz, CDCl <sub>3</sub> ) spectrum of compound <b>3</b> .....                 | 31 |
| <b>Figure S20.</b> HSQC (500 MHz, CDCl <sub>3</sub> ) spectrum of compound <b>3</b> .....                                | 32 |
| <b>Figure S21.</b> <sup>1</sup> H- <sup>1</sup> H COSY (500 MHz, CDCl <sub>3</sub> ) spectrum of compound <b>3</b> ..... | 33 |
| <b>Figure S22.</b> HMBC (500 MHz, CDCl <sub>3</sub> ) spectrum of compound <b>3</b> .....                                | 34 |
| <b>Figure S23.</b> HR-ESI-MS spectrum of compound <b>3</b> .....                                                         | 35 |
| <b>Figure S24.</b> <sup>1</sup> H NMR (400 MHz, CDCl <sub>3</sub> ) spectrum of compound <b>4</b> .....                  | 36 |
| <b>Figure S25.</b> <sup>13</sup> C NMR (100 MHz, CDCl <sub>3</sub> ) spectrum of compound <b>4</b> .....                 | 37 |
| <b>Figure S26.</b> HSQC (400 MHz, CDCl <sub>3</sub> ) spectrum of compound <b>4</b> .....                                | 38 |
| <b>Figure S27.</b> <sup>1</sup> H- <sup>1</sup> H COSY (400 MHz, CDCl <sub>3</sub> ) spectrum of compound <b>4</b> ..... | 39 |

|                                                                                                                          |    |
|--------------------------------------------------------------------------------------------------------------------------|----|
| <b>Figure S28.</b> HMBC (400 MHz, CDCl <sub>3</sub> ) spectrum of compound <b>4</b> .....                                | 40 |
| <b>Figure S29.</b> <sup>1</sup> H NMR (400 MHz, CDCl <sub>3</sub> ) spectrum of compound <b>5</b> .....                  | 41 |
| <b>Figure S30.</b> <sup>13</sup> C NMR (100 MHz, CDCl <sub>3</sub> ) spectrum of compound <b>5</b> .....                 | 42 |
| <b>Figure S31.</b> HSQC (400 MHz, CDCl <sub>3</sub> ) spectrum of compound <b>5</b> .....                                | 43 |
| <b>Figure S32.</b> <sup>1</sup> H- <sup>1</sup> H COSY (400 MHz, CDCl <sub>3</sub> ) spectrum of compound <b>5</b> ..... | 44 |
| <b>Figure S33.</b> HMBC (400 MHz, CDCl <sub>3</sub> ) spectrum of compound <b>5</b> .....                                | 45 |
| <b>Figure S34.</b> <sup>1</sup> H NMR (400 MHz, CDCl <sub>3</sub> ) spectrum of compound <b>6</b> .....                  | 46 |
| <b>Figure S35.</b> <sup>13</sup> C NMR (100 MHz, CDCl <sub>3</sub> ) spectrum of compound <b>6</b> .....                 | 47 |
| <b>Figure S36.</b> <sup>1</sup> H NMR (400 MHz, CDCl <sub>3</sub> ) spectrum of compound <b>7</b> .....                  | 48 |
| <b>Figure S37.</b> <sup>13</sup> C NMR (100 MHz, CDCl <sub>3</sub> ) spectrum of compound <b>7</b> .....                 | 49 |
| <b>Figure S38.</b> <sup>1</sup> H NMR (400 MHz, CDCl <sub>3</sub> ) spectrum of compound <b>8</b> .....                  | 50 |
| <b>Figure S39.</b> <sup>13</sup> C NMR (100 MHz, CDCl <sub>3</sub> ) spectrum of compound <b>8</b> .....                 | 51 |
| <b>Figure S40.</b> HSQC (400 MHz, CDCl <sub>3</sub> ) spectrum of compound <b>8</b> .....                                | 52 |
| <b>Figure S41.</b> <sup>1</sup> H- <sup>1</sup> H COSY (400 MHz, CDCl <sub>3</sub> ) spectrum of compound <b>8</b> ..... | 53 |
| <b>Figure S42.</b> HMBC (400 MHz, CDCl <sub>3</sub> ) spectrum of compound <b>8</b> .....                                | 54 |
| <b>Figure S43.</b> <sup>1</sup> H NMR (500 MHz, CDCl <sub>3</sub> ) spectrum of compound <b>9</b> .....                  | 55 |
| <b>Figure S44.</b> <sup>13</sup> C NMR (125 MHz, CDCl <sub>3</sub> ) spectrum of compound <b>9</b> .....                 | 56 |
| <b>Figure S45.</b> <sup>1</sup> H NMR (400 MHz, CDCl <sub>3</sub> ) spectrum of compound <b>10</b> .....                 | 57 |
| <b>Figure S46.</b> <sup>13</sup> C NMR (100 MHz, CDCl <sub>3</sub> ) spectrum of compound <b>10</b> .....                | 58 |
| <b>Figure S47.</b> <sup>1</sup> H NMR (400 MHz, Acetone- <i>d</i> <sub>6</sub> ) spectrum of compound <b>11</b> .....    | 59 |
| <b>Figure S48.</b> <sup>13</sup> C NMR (100 MHz, Acetone- <i>d</i> <sub>6</sub> ) spectrum of compound <b>11</b> .....   | 60 |
| <b>Figure S49.</b> <sup>1</sup> H NMR (400 MHz, CDCl <sub>3</sub> ) spectrum of compound <b>12</b> .....                 | 61 |
| <b>Figure S50.</b> <sup>13</sup> C NMR (100 MHz, CDCl <sub>3</sub> ) spectrum of compound <b>12</b> .....                | 62 |
| <b>Figure S51.</b> <sup>1</sup> H NMR (500 MHz, Acetone- <i>d</i> <sub>6</sub> ) spectrum of compound <b>13</b> .....    | 63 |
| <b>Figure S52.</b> <sup>13</sup> C NMR (125 MHz, Acetone- <i>d</i> <sub>6</sub> ) spectrum of compound <b>13</b> .....   | 64 |
| <b>Figure S53.</b> <sup>1</sup> H NMR (500 MHz, Acetone- <i>d</i> <sub>6</sub> ) spectrum of compound <b>14</b> .....    | 65 |
| <b>Figure S54.</b> <sup>13</sup> C NMR (125 MHz, Acetone- <i>d</i> <sub>6</sub> ) spectrum of compound <b>14</b> .....   | 66 |
| <b>Figure S55.</b> <sup>1</sup> H NMR (400 MHz, CDCl <sub>3</sub> ) spectrum of compound <b>15</b> .....                 | 67 |
| <b>Figure S56.</b> <sup>13</sup> C NMR (100 MHz, CDCl <sub>3</sub> ) spectrum of compound <b>15</b> .....                | 68 |
| <b>Figure S57.</b> B3LYP/6-31G(d) optimized lowest energy conformers for compound <b>1a</b> .....                        | 69 |
| <b>Table S11.</b> Energy (298.15 K) analysis for <b>1a</b> .....                                                         | 69 |
| <b>Table S12.</b> Calculated ECD data for <b>1a</b> in PCM (acetonitrile).....                                           | 70 |

**Table S1.** NMR data for compound **1** in CDCl<sub>3</sub> ( $\delta$  in ppm)

| Position | $\delta_c$ , Type     | $\delta_H$ (J in Hz)             | HMBC correlations                    | $^1H$ – $^1H$ COSY correlations |
|----------|-----------------------|----------------------------------|--------------------------------------|---------------------------------|
| 1        | 129.9, C              |                                  |                                      |                                 |
| 2        | 151.6, C              |                                  |                                      |                                 |
| 3        | 117.4, CH             | 6.64, s                          | C-1, C-2, C-5, and C-15              |                                 |
| 4        | 134.3, C              |                                  |                                      |                                 |
| 5        | 122.4, CH             | 6.62, d (7.7)                    | C-1, C-3, C-6, and C-15              | H-5/H-6                         |
| 6        | 127.9, CH             | 6.93, d (7.7)                    | C-2, C-4, and C-7                    |                                 |
| 7        | 131.7, C              |                                  |                                      |                                 |
| 8        | 132.0, CH             | 5.53, t (7.0)                    | C-1, C-9, C-10, and C-14             |                                 |
| 9        | 26.5, CH <sub>2</sub> | 2.20, q (8.0)                    | C-7, C-8, C-10, and C-11             | H-8/H-9,                        |
| 10       | 38.7, CH <sub>2</sub> | 1.32, q (7.5)                    | C-8, C-9, C-11, C-12, and C-13       | H-9/H-10,                       |
| 11       | 27.9, CH              | 1.60, m                          | C-9, C-10, C-12, and C-13            | H-10/H-11,                      |
| 12       | 22.6, CH <sub>3</sub> | 0.91, d (6.6)                    | C-10, C-11, and C-13                 | H-11/H-12 and H-13              |
| 13       | 22.6, CH <sub>3</sub> | 0.91, d (6.6)                    | C-10, C-11, and C-12                 |                                 |
| 14       | 18.0, CH <sub>3</sub> | 1.94, s                          | C-1, C-7, and C-8                    |                                 |
| 15       | 40.3, CH <sub>2</sub> | 2.94, d (13.4)<br>3.31, d (13.4) | C-3, C-4, C-5, C-3', C-4', and C-5'  |                                 |
| 1'       | 157.1, C              |                                  |                                      |                                 |
| 2'       | 124.0, CH             | 6.10, s                          | C-4', C-6', and C-7'                 |                                 |
| 3'       | 197.6, C              |                                  |                                      |                                 |
| 4'       | 81.8, C               |                                  |                                      |                                 |
| 5'       | 118.9, C              |                                  |                                      |                                 |
| 6'       | 42.0, CH <sub>2</sub> | 3.01, d (19.1)<br>3.14, d (19.0) | C-1', C-2', C-4', C-5', and C-7'     |                                 |
| 7'       | 24.3, CH <sub>3</sub> | 2.10, s                          | C-1', C-2', and C-6'                 |                                 |
| 8'       | 132.2, C              |                                  |                                      |                                 |
| 9'       | 102.4, CH             | 6.33, s                          | C-8', C-10', C-11', C-13', and C-14' |                                 |
| 10'      | 148.6, C              |                                  |                                      |                                 |
| 11'      | 132.2, C              |                                  |                                      |                                 |
| 12'      | 138.1, C              |                                  |                                      |                                 |
| 13'      | 111.3, CH             | 6.26, s                          | C-9', C-11', C-12', and C-14'        |                                 |
| 14'      | 21.5, CH <sub>3</sub> | 2.23, s                          | C-8', C-9', and C-13'                |                                 |
| 2-OH     |                       | 5.51, s                          | C-1, C-2, and C-3                    |                                 |
| 4'-OH    |                       | 3.52, s                          | C-15, C-3', C-4', and C-5'           |                                 |
| 10'-OH   |                       | 4.78, s                          |                                      |                                 |



**Table S2.** NMR data for compound **2** in CDCl<sub>3</sub> ( $\delta$  in ppm)

| Position | $\delta_c$ , Type     | $\delta_H$ (J in Hz) | HMBC correlations                   | <sup>1</sup> H– <sup>1</sup> H COSY correlations |
|----------|-----------------------|----------------------|-------------------------------------|--------------------------------------------------|
| 1        | 128.0, C              |                      |                                     |                                                  |
| 2        | 156.1, C              |                      |                                     |                                                  |
| 3        | 116.4, CH             | 6.92, s              | C-1, C-2, C-5, and C-15             |                                                  |
| 4        | 137.3, C              |                      |                                     |                                                  |
| 5        | 119.1, CH             | 6.89, d (7.9)        | C-1, C-3, and C-15                  | H-5/H-6                                          |
| 6        | 127.7, CH             | 7.00, d (7.9)        | C-2, C-4, and C-7                   |                                                  |
| 7        | 82.9, C               |                      |                                     |                                                  |
| 8        | 40.2, CH <sub>2</sub> | 1.82, m<br>1.93, m   | C-1, C-7, C-9, C-10, and C-14       |                                                  |
| 9        | 21.8, CH <sub>2</sub> | 1.33, m              | C-10 and C-11                       | H-8/H-9,                                         |
| 10       | 39.1, CH <sub>2</sub> | 1.14, m              | C-8, C-9, C-11, C-12, and C-13      | H-9/H-10,                                        |
| 11       | 27.9, CH              | 1.50, m              | C-10, C-12, and C-13                | H-10/H-11,                                       |
| 12       | 22.7, CH <sub>3</sub> | 0.83, d (6.6)        | C-10, C-11, and C-13                | H-11/H-12 and H-13                               |
| 13       | 22.8, CH <sub>3</sub> | 0.84, d (6.6)        | C-10, C-11, and C-12                |                                                  |
| 14       | 22.4, CH <sub>3</sub> | 1.58, s              | C-1, C-7, and C-8                   |                                                  |
| 15       | 66.2, CH <sub>2</sub> | 5.27, s              | C-3, C-4, C-5, and C-15'            |                                                  |
| 1'       | 134.5, C              |                      |                                     |                                                  |
| 2'       | 156.3, C              |                      |                                     |                                                  |
| 3'       | 119.2, CH             | 7.56, s              | C-1', C-2', C-4', C-5', and C-15'   |                                                  |
| 4'       | 130.7, C              |                      |                                     |                                                  |
| 5'       | 120.8, CH             | 7.52, d (8.2)        | C-1', C-3', and C-15'               | H-5'/H-6'                                        |
| 6'       | 126.4, CH             | 7.05, d (8.2)        | C-2', C-4', and C-7'                |                                                  |
| 7'       | 79.2, C               |                      |                                     |                                                  |
| 8'       | 43.1, CH <sub>2</sub> | 1.81, m<br>1.90, m   | C-1', C-7', C-9', C-10', and C-14'  |                                                  |
| 9'       | 21.8, CH <sub>2</sub> | 1.29, m              | C-10' and C-11'                     | H-8'/H-9',                                       |
| 10'      | 39.3, CH <sub>2</sub> | 1.14, m              | C-8', C-9', C-11', C-12', and C-13' | H-9'/H-10',                                      |
| 11'      | 27.9, CH              | 1.50, m              | C-10', C-12', and C-13'             | H-10'/H-11',                                     |
| 12'      | 22.7, CH <sub>3</sub> | 0.83, d (6.6)        | C-10', C-11', and C-13'             | H-11'/H-12' and H-13'                            |
| 13'      | 22.7, CH <sub>3</sub> | 0.83, d (6.6)        | C-10', C-11', and C-12'             |                                                  |
| 14'      | 29.3, CH <sub>3</sub> | 1.66, s              | C-1', C-7', and C-8'                |                                                  |
| 15'      | 166.3, C              |                      |                                     |                                                  |
| 2-OH     |                       | 8.88, s              | C-1, C-2, and C-3                   |                                                  |
| 2'-OH    |                       | 9.30, s              | C-2'                                |                                                  |
| 7-OMe    | 50.6, CH <sub>3</sub> | 3.22, s              | C-7                                 |                                                  |

**Table S3.** NMR data for compound **3** in CDCl<sub>3</sub> ( $\delta$  in ppm)

| Position | $\delta_C$ , Type     | $\delta_H$ (J in Hz) | HMBC correlations              | $^1H$ - $^1H$ COSY correlations                                    |
|----------|-----------------------|----------------------|--------------------------------|--------------------------------------------------------------------|
| 1        | 131.1, C              |                      |                                |                                                                    |
| 2        | 152.2, C              |                      |                                |                                                                    |
| 3        | 115.0, CH             | 6.98, s              | C-1, C-2, C-5, and C-15        |                                                                    |
| 4        | 136.2, C              |                      |                                |                                                                    |
| 5        | 119.9, CH             | 6.93, d (7.8)        | C-1, C-3, and C-15             | H-5/H-6                                                            |
| 6        | 128.6, CH             | 7.07, d (7.8)        | C-1, C-2, C-4, and C-7         |                                                                    |
| 7        | 131.6, C              |                      |                                |                                                                    |
| 8        | 132.3, CH             | 5.56, t (7.1)        | C-1, C-9, and C-14             |                                                                    |
| 9        | 26.5, CH <sub>2</sub> | 2.22, q (7.5)        | C-7, C-8, C-10, and C-11       | H-8/H-9,                                                           |
| 10       | 38.7, CH <sub>2</sub> | 1.33, m              | C-8, C-9, C-11, C-12, and C-13 | H-9/H-10,                                                          |
| 11       | 27.9, CH              | 1.60, m              | C-10, C-12, and C-13           | H-10/H-11,                                                         |
| 12       | 22.7, CH <sub>3</sub> | 0.93, d (6.6)        | C-10, C-11, and C-13           | H-11/H-12 and H-13                                                 |
| 13       | 22.7, CH <sub>3</sub> | 0.93, d (6.6)        | C-10, C-11, and C-12           |                                                                    |
| 14       | 18.0, CH <sub>3</sub> | 1.98, s              | C-1, C-7, and C-8              |                                                                    |
| 15       | 66.4, CH <sub>2</sub> | 5.27, s              | C-3, C-4, C-5, and C-15'       |                                                                    |
| 1'       | 134.5, C              |                      |                                |                                                                    |
| 2'       | 156.3, C              |                      |                                |                                                                    |
| 3'       | 119.0, CH             | 7.55, s              | C-1', C-2', C-5', and C-15'    |                                                                    |
| 4'       | 130.7, C              |                      |                                |                                                                    |
| 5'       | 120.8, CH             | 7.52, d (8.2)        | C-1', C-3', and C-15'          | H-5'/H-6'                                                          |
| 6'       | 126.4, CH             | 7.04, d (8.1)        | C-2', C-4', and C-7'           |                                                                    |
| 7'       | 79.2, C               |                      |                                |                                                                    |
| 8'       | 43.1, CH <sub>2</sub> | 1.79, m<br>1.91, m   | C-1', C-7', and C-14'          | H-8'/H-9',<br>H-9'/H-10',<br>H-10'/H-11',<br>H-11'/H-12' and H-13' |
| 9'       | 21.8, CH <sub>2</sub> | 1.28, m              | C-8' and C-10'                 |                                                                    |
| 10'      | 39.1, CH <sub>2</sub> | 1.14, m              | C-11', C-12', and C-13'        |                                                                    |
| 11'      | 27.9, CH              | 1.49, m              | C-10', C-12', and C-13'        |                                                                    |
| 12'      | 22.7, CH <sub>3</sub> | 0.82, d (6.6)        | C-10', C-11', and C-13'        |                                                                    |
| 13'      | 22.7, CH <sub>3</sub> | 0.83, d (6.6)        | C-10', C-11', and C-12'        |                                                                    |
| 14'      | 29.3, CH <sub>3</sub> | 1.66, s              | C-1', C-7', and C-8'           |                                                                    |
| 15'      | 166.3, C              |                      |                                |                                                                    |
| 2'-OH    |                       | 9.30, s              |                                |                                                                    |

**Table S4.** NMR data for compound **4** in CDCl<sub>3</sub> ( $\delta$  in ppm)

| Position | $\delta_C$ , Type     | $\delta_H$ ( $J$ in Hz) | HMBC correlations                   | $^1H$ - $^1H$ COSY correlations                                    |
|----------|-----------------------|-------------------------|-------------------------------------|--------------------------------------------------------------------|
| 1        | 129.7, C              |                         |                                     |                                                                    |
| 2        | 156.2, C              |                         |                                     |                                                                    |
| 3        | 117.0, CH             | 6.90, s                 | C-1, C-2, C-5, and C-15             |                                                                    |
| 4        | 136.9, C              |                         |                                     |                                                                    |
| 5        | 118.9, CH             | 6.86, d (7.9)           | C-1, C-3, and C-15                  | H-5/H-6                                                            |
| 6        | 126.5, CH             | 6.98, d (7.9)           | C-2 and C-4                         |                                                                    |
| 7        | 78.9, C               |                         |                                     |                                                                    |
| 8        | 43.0, CH <sub>2</sub> | 1.80, m<br>1.89, m      | C-1, C-7, C-9, C-10, and C-14       | H-8/H-9,<br>H-9/H-10,<br>H-10/H-11,<br>H-11/H-12 and H-13          |
| 9        | 21.8, CH <sub>2</sub> | 1.29, m                 | C-7, C-8, C-10, and C-11            |                                                                    |
| 10       | 39.2, CH <sub>2</sub> | 1.15, m                 | C-8, C-9, C-11, C-12, and C-13      |                                                                    |
| 11       | 27.9, CH              | 1.49, m                 | C-9, C-10, C-12, and C-13           |                                                                    |
| 12       | 22.7, CH <sub>3</sub> | 0.82, d (6.6)           | C-10, C-11, and C-13                |                                                                    |
| 13       | 22.6, CH <sub>3</sub> | 0.84, d (6.6)           | C-10, C-11, and C-12                |                                                                    |
| 14       | 29.1, CH <sub>3</sub> | 1.64, s                 | C-1, C-7, and C-8                   |                                                                    |
| 15       | 66.2, CH <sub>2</sub> | 5.24, s                 | C-3, C-4, C-5, and C-15'            |                                                                    |
| 1'       | 134.8, C              |                         |                                     |                                                                    |
| 2'       | 156.1, C              |                         |                                     |                                                                    |
| 3'       | 118.9, CH             | 7.50, s                 | C-1', C-2', C-4', C-5', and C-15'   |                                                                    |
| 4'       | 130.6, C              |                         |                                     |                                                                    |
| 5'       | 120.9, CH             | 7.50, d (8.2)           | C-1', C-3', and C-15'               | H-5'/H-6'                                                          |
| 6'       | 126.4, CH             | 6.98, d (8.2)           | C-2', C-4', and C-7'                |                                                                    |
| 7'       | 79.1, C               |                         |                                     |                                                                    |
| 8'       | 43.0, CH <sub>2</sub> | 1.80, m<br>1.89, m      | C-1', C-7', C-9', C-10', and C-14'  | H-8'/H-9',<br>H-9'/H-10',<br>H-10'/H-11',<br>H-11'/H-12' and H-13' |
| 9'       | 21.8, CH <sub>2</sub> | 1.29, m                 | C-7', C-8', C-10', and C-11'        |                                                                    |
| 10'      | 39.1, CH <sub>2</sub> | 1.15, m                 | C-8', C-9', C-11', C-12', and C-13' |                                                                    |
| 11'      | 27.9, CH              | 1.49, m                 | C-9', C-10', C-12', and C-13'       |                                                                    |
| 12'      | 22.7, CH <sub>3</sub> | 0.81, d (6.6)           | C-10', C-11', and C-13'             |                                                                    |
| 13'      | 22.7, CH <sub>3</sub> | 0.82, d (6.6)           | C-10', C-11', and C-12'             |                                                                    |
| 14'      | 29.1, CH <sub>3</sub> | 1.65, s                 | C-1', C-7', and C-8'                |                                                                    |
| 15'      | 166.4, C              |                         |                                     |                                                                    |

Peniciaculin B (**4**): colorless oil;  $[\alpha]_D^{20} = +11.00$  (c 0.1, MeCN); UV (MeCN):  $\lambda_{\max}$  (log $\epsilon$ ) 223 (3.08), 246 (2.76), 286 (1.19) nm; ECD (MeCN):  $\lambda_{\text{ext}}$  ( $\Delta\epsilon$ ) 191 (+7.76), 209 (−5.61), 230 (+1.61), 282 (+2.52) nm.

**Table S5.** NMR data for compound **5** in CDCl<sub>3</sub> ( $\delta$  in ppm)

| Position | $\delta_C$ , Type     | $\delta_H$ ( $J$ in Hz) | HMBC correlations              | $^1H$ - $^1H$ COSY correlations |
|----------|-----------------------|-------------------------|--------------------------------|---------------------------------|
| 1        | 125.7, C              |                         |                                |                                 |
| 2        | 151.7, C              |                         |                                |                                 |
| 3        | 114.9, CH             | 6.81, s                 | C-1, C-2, C-5, and C-15        |                                 |
| 4        | 140.7, C              |                         |                                |                                 |
| 5        | 120.7, CH             | 6.79, d (7.5)           | C-1, C-3, and C-15             | H-5/H-6                         |
| 6        | 128.7, CH             | 6.89, d (7.5)           | C-2 and C-4                    |                                 |
| 7        | 131.1, C              |                         |                                |                                 |
| 8        | 131.9, CH             | 5.66, td (1.2, 7.2)     | C-1, C-7, C-9, C-10, and C-14  |                                 |
| 9        | 27.2, CH <sub>2</sub> | 1.80, dd (7.2, 15.2)    | C-7, C-8, C-10, and C-11       | H-8/H-9,                        |
| 10       | 38.9, CH <sub>2</sub> | 1.17, dd (7.0, 15.2)    | C-8, C-9, C-11, C-12, and C-13 | H-9/H-10,<br>H-10/H-11,         |
| 11       | 27.5, CH              | 1.45, m                 | C-9, C-10, C-12, and C-13      | H-11/H-12 and H-13              |
| 12       | 22.6, CH <sub>3</sub> | 0.77, d (6.6)           | C-10, C-11, and C-13           |                                 |
| 13       | 22.6, CH <sub>3</sub> | 0.77, d (6.6)           | C-10, C-11, and C-12           |                                 |
| 14       | 25.4, CH <sub>3</sub> | 1.93, s                 | C-1, C-7, C-8, and C-10        |                                 |
| 15       | 29.1, CH <sub>2</sub> | 3.92, s                 | C-3, C-4, C-5, C-3', and C-4'  |                                 |
| 1'       | 138.3, C              |                         |                                |                                 |
| 2'       | 112.5, CH             | 6.45, s                 | C-3', C-4', C-6', and C-7'     |                                 |
| 3'       | 155.3, C              |                         |                                |                                 |
| 4'       | 116.4, C              |                         |                                |                                 |
| 5'       | 155.2, C              |                         |                                |                                 |
| 6'       | 113.3, CH             | 6.38, s                 | C-2', C-3', C-4', and C-7'     |                                 |
| 7'       | 21.3, CH <sub>3</sub> | 2.22, s                 | C-1', C-2', and C-6'           |                                 |
| 8'       | 141.0, C              |                         |                                |                                 |
| 9'       | 111.2, CH             | 6.34, s                 | C-10', C-11', C-13', and C-14' |                                 |
| 10'      | 159.1, C              |                         |                                |                                 |
| 11'      | 102.5, CH             | 6.21, t (2.0)           | C-10', and C-12'               |                                 |
| 12'      | 156.7, C              |                         |                                |                                 |
| 13'      | 110.6, CH             | 6.34, s                 | C-9', C-11', C-12', and C-14'  |                                 |
| 14'      | 21.6, CH <sub>3</sub> | 2.24, s                 | C-8', C-9', and C-13'          |                                 |

**Table S6.** NMR data for compounds **6** and **7** in CDCl<sub>3</sub> ( $\delta$  in ppm)

| Position | <b>6</b>              |                      | <b>7</b>              |                      |
|----------|-----------------------|----------------------|-----------------------|----------------------|
|          | $\delta_C$ , Type     | $\delta_H$ (J in Hz) | $\delta_C$ , Type     | $\delta_H$ (J in Hz) |
| 1        | 125.1, C              |                      | 128.6, C              |                      |
| 2        | 151.3, C              |                      | 151.6, C              |                      |
| 3        | 114.5, CH             | 6.67, s              | 115.0, CH             | 6.66, s              |
| 4        | 140.4, C              |                      | 140.4, C              |                      |
| 5        | 120.7, CH             | 6.71, d (7.4)        | 120.5, CH             | 6.67, d (7.7)        |
| 6        | 128.3, CH             | 6.87, d (7.4)        | 128.1, CH             | 6.92, d (7.7)        |
| 7        | 131.2, C              |                      | 132.0, C              |                      |
| 8        | 131.8, CH             | 5.65, t (6.4)        | 131.7, CH             | 5.51, t (6.6)        |
| 9        | 27.2, CH <sub>2</sub> | 1.80, m              | 26.5, CH <sub>2</sub> | 1.74, m              |
| 10       | 38.9, CH <sub>2</sub> | 1.17, m              | 38.8, CH <sub>2</sub> | 1.31, dd (7.2, 15.2) |
| 11       | 27.5, CH              | 1.44, m              | 27.9, CH              | 1.59, m              |
| 12       | 22.5, CH <sub>3</sub> | 0.76, d (6.1)        | 22.6, CH <sub>3</sub> | 0.91, d (6.6)        |
| 13       | 22.5, CH <sub>3</sub> | 0.76, d (6.1)        | 22.6, CH <sub>3</sub> | 0.91, d (6.6)        |
| 14       | 25.4, CH <sub>3</sub> | 1.94, s              | 18.0, CH <sub>3</sub> | 1.94, s              |
| 15       | 31.5, CH <sub>2</sub> | 3.90, s              | 31.4, CH <sub>2</sub> | 3.88, s              |
| 1'       | 141.0, C              |                      | 141.0, C              |                      |
| 2'       | 123.0, C              |                      | 122.9, C              |                      |
| 3'       | 155.8, C              |                      | 155.7, C              |                      |
| 4'       | 104.7, CH             | 6.29, s              | 104.8, CH             | 6.29, s              |
| 5'       | 154.5, C              |                      | 154.5, C              |                      |
| 6'       | 113.1, CH             | 6.46, s              | 113.4, CH             | 6.46, s              |
| 7'       | 20.2, CH <sub>3</sub> | 2.22, s              | 21.3, CH <sub>3</sub> | 2.22, s              |
| 8'       | 141.5, C              |                      | 141.1, C              |                      |
| 9'       | 111.5, CH             | 6.33, s              | 111.4, CH             | 6.32, s              |
| 10'      | 158.8, C              |                      | 158.8, C              |                      |
| 11'      | 102.7, CH             | 6.18, s              | 102.6, CH             | 6.17, s              |
| 12'      | 156.6, C              |                      | 156.7, C              |                      |
| 13'      | 110.8, CH             | 6.33, s              | 110.7, CH             | 6.32, s              |
| 14'      | 21.6, CH <sub>3</sub> | 2.22, s              | 21.6, CH <sub>3</sub> | 2.22, s              |

**Table S7.** NMR data for compound **8** in CDCl<sub>3</sub> ( $\delta$  in ppm)

| Position | $\delta_C$ , Type     | $\delta_H$ (J in Hz) | HMBC correlations                   | $^1H$ - $^1H$ COSY correlations |
|----------|-----------------------|----------------------|-------------------------------------|---------------------------------|
| 1        | 125.8, C              |                      |                                     |                                 |
| 2        | 155.9, C              |                      |                                     |                                 |
| 3        | 116.5, CH             | 6.64, s              | C-2, C-5, and C-15                  |                                 |
| 4        | 141.2, C              |                      |                                     |                                 |
| 5        | 119.5, CH             | 6.65, d (7.8)        | C-1, C-3, and C-15                  | H-5/H-6                         |
| 6        | 127.6, CH             | 6.89, d (7.8)        | C-2, C-4, and C-7                   |                                 |
| 7        | 82.9, C               |                      |                                     |                                 |
| 8        | 40.2, CH <sub>2</sub> | 1.78, m              | C-1, C-9, and C-14                  |                                 |
| 9        | 21.7, CH <sub>2</sub> | 1.13, m              | C-7, C-8, C-10, and C-11            | H-8/H-9,                        |
|          |                       | 1.32, m              |                                     | H-9/H-10,                       |
| 10       | 39.2, CH <sub>2</sub> | 1.11, m              | C-8, C-9, C-11, C-12, and C-13      | H-10/H-11,                      |
| 11       | 27.9, CH              | 1.48, m              | C-9, C-10, C-12, and C-13           | H-11/H-12 and H-13              |
| 12       | 22.6, CH <sub>3</sub> | 0.82, d (6.6)        | C-10, C-11, and C-13                |                                 |
| 13       | 22.7, CH <sub>3</sub> | 0.84, d (6.6)        | C-10, C-11, and C-12                |                                 |
| 14       | 22.4, CH <sub>3</sub> | 1.55, s              | C-6, C-7, and C-8                   |                                 |
| 15       | 31.2, CH <sub>2</sub> | 3.94, s              | C-3, C-4, C-5, C-1', C-2', and C-3' |                                 |
| 1'       | 139.9, C              |                      |                                     |                                 |
| 2'       | 120.4, C              |                      |                                     |                                 |
| 3'       | 155.1, C              |                      |                                     |                                 |
| 4'       | 104.5, CH             | 6.36, s              | C-1', C-2', C-4', and C-5'          |                                 |
| 5'       | 156.0, C              |                      |                                     |                                 |
| 6'       | 113.4, CH             | 6.45, s              | C-1', C-2', C-3', C-4', and C-7'    |                                 |
| 7'       | 20.3, CH <sub>3</sub> | 2.22, s              | C-1', C-2', and C-6'                |                                 |
| 8'       | 141.0, C              |                      |                                     |                                 |
| 9'       | 111.2, CH             | 6.40, s              | C-10', C-11', C-12', and C-14'      |                                 |
| 10'      | 156.9, C              |                      |                                     |                                 |
| 11'      | 103.4, CH             | 6.30, s              | C-9', C-10', C-12', C-13'           |                                 |
| 12'      | 158.4, C              |                      |                                     |                                 |
| 13'      | 112.0, CH             | 6.42, s              | C-9', C-11', C-12', and C-14',      |                                 |
| 14'      | 21.6, CH <sub>3</sub> | 2.27, s              | C-8', C-9', and C-13'               |                                 |
| 7-OMe    | 50.5, CH <sub>3</sub> | 3.19, s              | C-7                                 |                                 |
| 2-OH     |                       | 8.79, s              | C-1, C-2, and C-3                   |                                 |

Expansol A (**8**): colorless oil;  $[\alpha]_D^{20} = +3.67$  (c 0.3, MeCN); UV (MeCN):  $\lambda_{\max}$  (log $\epsilon$ ) 197 (3.87), 280 (0.51) nm.

**Table S8.** NMR data for compounds **9** and **10** in CDCl<sub>3</sub> ( $\delta$  in ppm)

| Position | <b>9</b>              |                      | <b>10</b>             |                      |
|----------|-----------------------|----------------------|-----------------------|----------------------|
|          | $\delta_c$ , Type     | $\delta_H$ (J in Hz) | $\delta_c$ , Type     | $\delta_H$ (J in Hz) |
| 1        | 129.8, C              |                      | 129.3, C              |                      |
| 2        | 157.0, C              |                      | 157.9, C              |                      |
| 3        | 117.5, CH             | 6.91, d (1.5)        | 116.9, CH             | 6.87, s              |
| 4        | 136.2, C              |                      | 140.8, C              |                      |
| 5        | 119.3, CH             | 6.86, dd (1.5, 8.0)  | 118.7, CH             | 6.87, d (7.8)        |
| 6        | 126.6, CH             | 7.00, d (8.0)        | 126.6, CH             | 6.98, d (7.8)        |
| 7        | 79.1, C               |                      | 79.1, C               |                      |
| 8        | 43.0, CH <sub>2</sub> | 1.80, m<br>1.91, m   | 43.0, CH <sub>2</sub> | 1.79, m<br>1.88, m   |
| 9        | 21.8, CH <sub>2</sub> | 1.29, m              | 21.8, CH <sub>2</sub> | 1.28, m              |
| 10       | 39.1, CH <sub>2</sub> | 1.15, m              | 39.2, CH <sub>2</sub> | 1.15, m              |
| 11       | 27.9, CH              | 1.50, m              | 27.9, CH              | 1.50, m              |
| 12       | 22.7, CH <sub>3</sub> | 0.83, d (6.6)        | 22.7, CH <sub>3</sub> | 0.83, d (6.5)        |
| 13       | 22.7, CH <sub>3</sub> | 0.83, d (6.6)        | 22.7, CH <sub>3</sub> | 0.83, d (6.5)        |
| 14       | 29.2, CH <sub>3</sub> | 1.66, s              | 29.1, CH <sub>3</sub> | 1.64, s              |
| 15       | 66.7, CH <sub>2</sub> | 5.31, s              | 69.6, CH <sub>2</sub> | 4.94, s              |
| 1'       | 143.9, C              |                      | 137.8, C              |                      |
| 2'       | ND <sup>a</sup>       |                      | 112.6, CH             |                      |
| 3'       | 165.4, C              |                      | 158.2, C              |                      |
| 4'       | 103.4, CH             | 6.34, d (2.3)        | 103.4, CH             | 6.24, s              |
| 5'       | 162.5, C              |                      | 156.0, C              |                      |
| 6'       | 113.1, CH             | 6.36, d (2.3)        | 112.2, CH             | 6.43, s              |
| 7'       | 24.8, CH <sub>3</sub> | 2.51, s              | 21.8, CH <sub>3</sub> | 2.46, s              |
| 8'       | 141.4, C              |                      | 141.0, C              |                      |
| 9'       | 112.7, CH             | 6.49, s              | 111.3, CH             | 6.54, s              |
| 10'      | 156.1, C              |                      | 159.7, C              |                      |
| 11'      | 105.2, CH             | 6.36, d (2.6)        | 103.2, CH             | 6.43, s              |
| 12'      | 156.5, C              |                      | 156.7, C              |                      |
| 13'      | 113.6, CH             | 6.44, s              | 111.4, CH             | 6.43, s              |
| 14'      | 21.6, CH <sub>3</sub> | 2.28, s              | 21.6, CH <sub>3</sub> | 2.28, s              |
| 15'      | 171.5, C              |                      |                       |                      |
| 2-OH     |                       | 9.25, s              |                       | 9.30, s              |
| 3'-OH    |                       | 11.65, s             |                       |                      |

<sup>a</sup> ND: No detected.

Asptenol A (**9**): colorless oil; UV (MeCN):  $\lambda_{\max}$  (log  $\epsilon$ ) 200 (2.78), 243 (0.35) nm, 264 (0.53) nm; ECD (MeCN):  $\lambda_{\text{ext}}$  ( $\Delta\epsilon$ ) 205 (−1.68), 230 (+0.60), 280 (+0.74) nm.

Peniciaculin A (**10**): colorless oil;  $[\alpha]_D^{20} = +5.00$  (c 0.3, MeCN); UV (MeCN):  $\lambda_{\max}$  (log  $\epsilon$ ) 201 (2.29), 278 (0.20) nm; ECD (MeCN):  $\lambda_{\text{ext}}$  ( $\Delta\epsilon$ ) 224 (−0.63), 232 (+0.87), 279 (+2.23) nm.

**Table S9.** NMR data for compounds **11–13** ( $\delta$  in ppm)

| Position | <b>11</b> <sup>a</sup>     |                               | <b>12</b> <sup>b</sup>     |                               | <b>13</b> <sup>a</sup>     |                               |
|----------|----------------------------|-------------------------------|----------------------------|-------------------------------|----------------------------|-------------------------------|
|          | $\delta_{\text{C}}$ , Type | $\delta_{\text{H}}$ (J in Hz) | $\delta_{\text{C}}$ , Type | $\delta_{\text{H}}$ (J in Hz) | $\delta_{\text{C}}$ , Type | $\delta_{\text{H}}$ (J in Hz) |
| 1        | 134.1, C                   |                               | 137.1, C                   |                               | 129.1, C                   |                               |
| 2        | 154.6, C                   |                               | 157.0, C                   |                               | 154.9, C                   |                               |
| 3        | 114.5, CH                  | 6.83, s                       | 119.1, CH                  | 7.34, s                       | 109.4, CH                  | 7.38, s                       |
| 4        | 143.4, C                   |                               | 136.1, C                   |                               | 139.2, C                   |                               |
| 5        | 118.3, CH                  | 6.73, d (7.6)                 | 120.5, CH                  | 7.15, d (7.4)                 | 121.8, CH                  | 7.17, d (7.8)                 |
| 6        | 129.6, CH                  | 6.85, d (7.6)                 | 127.1, CH                  | 7.35, d (7.4)                 | 119.0, C                   | 7.38, d (7.8)                 |
| 7        | 128.1, C                   |                               | 79.4, C                    |                               | 110.0, C                   |                               |
| 8        | 130.1, CH                  | 5.41, t (7.2)                 | 43.1, CH <sub>2</sub>      | 1.82, m<br>1.93, m            | 155.2, C                   |                               |
| 9        | 27.8, CH <sub>2</sub>      | 1.79, dd<br>(7.4,15.0)        | 21.7, CH <sub>2</sub>      | 1.33, m                       | 24.7, CH <sub>2</sub>      | 2.75, t (7.6)                 |
| 10       | 39.7, CH <sub>2</sub>      | 1.13, dd<br>(7.4,15.0)        | 39.1, CH <sub>2</sub>      | 1.17, m                       | 37.9, CH <sub>2</sub>      | 1.58, m                       |
| 11       | 28.2, CH                   | 1.41, m                       | 27.9, CH                   | 1.49, m                       | 28.3, CH                   | 1.58, m                       |
| 12       | 22.8, CH <sub>3</sub>      | 0.70, d (6.6)                 | 22.6, CH <sub>3</sub>      | 0.83, d (6.6)                 | 22.6, CH <sub>3</sub>      | 0.94, d (6.4)                 |
| 13       | 22.8, CH <sub>3</sub>      | 0.70, d (6.6)                 | 22.7, CH <sub>3</sub>      | 0.83, d (6.6)                 | 22.6, CH <sub>3</sub>      | 0.94, d (6.4)                 |
| 14       | 25.0, CH <sub>3</sub>      | 1.88, s                       | 29.3, CH <sub>3</sub>      | 1.69, s                       | 7.9, CH <sub>3</sub>       | 2.15, s                       |
| 15       | 64.5, CH <sub>2</sub>      | 4.47, s                       | 192.1, CH                  | 9.92, s                       | 64.9, CH <sub>2</sub>      | 4.69, d (5.4)                 |

<sup>a</sup> Measured in acetone-*d*<sub>6</sub>.<sup>b</sup> Measured in CDCl<sub>3</sub>.



**Table S10.** NMR data for compounds **14** and **15** ( $\delta$  in ppm)

| Position | <b>14</b> <sup>a</sup>     |                               | <b>15</b> <sup>b</sup>     |                               |
|----------|----------------------------|-------------------------------|----------------------------|-------------------------------|
|          | $\delta_{\text{C}}$ , Type | $\delta_{\text{H}}$ (J in Hz) | $\delta_{\text{C}}$ , Type | $\delta_{\text{H}}$ (J in Hz) |
| 1        | 141.2, C                   |                               | 141.1, C                   |                               |
| 2        | 112.5, CH                  | 6.29, s                       | 112.2, CH                  | 6.40, s                       |
| 3        | 159.0, C                   |                               | 158.1, C                   |                               |
| 4        | 102.0, CH                  | 6.25, t (2.0)                 | 103.6, CH                  | 6.29, s                       |
| 5        | 159.1, C                   |                               | 156.7, C                   |                               |
| 6        | 111.4, CH                  | 6.43, s                       | 111.4, CH                  | 6.40, s                       |
| 7        | 21.5, CH <sub>3</sub>      | 2.25, s                       | 21.6, CH <sub>3</sub>      | 2.25, s                       |
| 8        | 141.2, C                   |                               | 141.1, C                   |                               |
| 9        | 112.0, CH                  | 6.51, s                       | 112.2, CH                  | 6.40, s                       |
| 10       | 159.4, C                   |                               | 158.1, C                   |                               |
| 11       | 104.0, CH                  | 6.35, s                       | 103.6, CH                  | 6.29, s                       |
| 12       | 161.8, C                   |                               | 156.7, C                   |                               |
| 13       | 110.3, CH                  | 6.39, s                       | 111.4, CH                  | 6.40, s                       |
| 14       | 21.4, CH <sub>3</sub>      | 2.21, s                       | 21.6, CH <sub>3</sub>      | 2.25, s                       |
| 12-OMe   | 55.5, CH <sub>3</sub>      | 3.74, s                       |                            |                               |

<sup>a</sup> Measured in acetone-*d*<sub>6</sub>.<sup>b</sup> Measured in CDCl<sub>3</sub>.**Figure S1.** ECD Spectra of Compounds **2–4** and **12**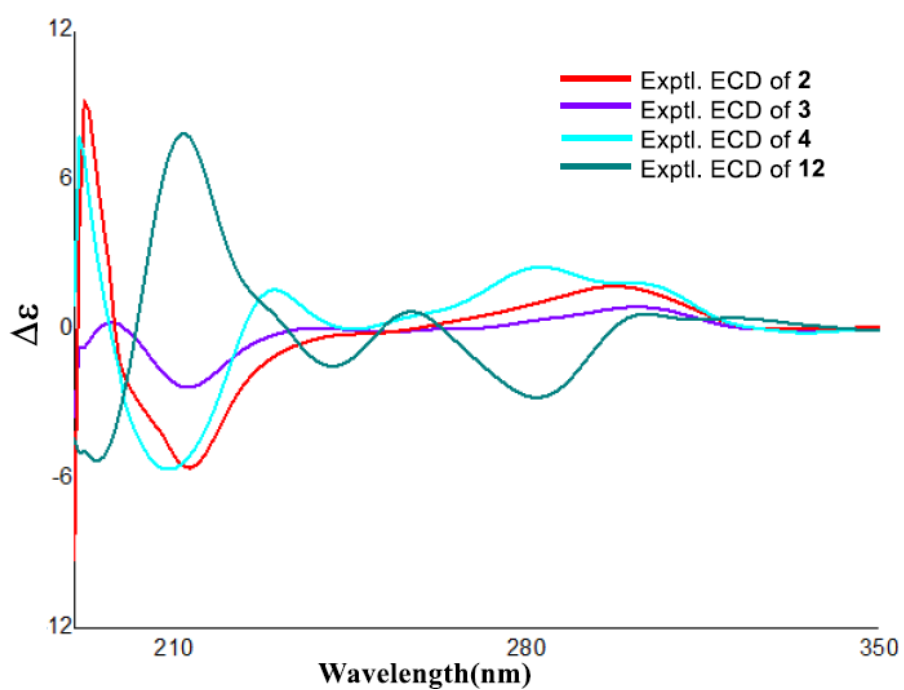

**Figure S2.**  $^1\text{H}$  NMR (500 MHz,  $\text{CDCl}_3$ ) Spectrum of Compound **1a**

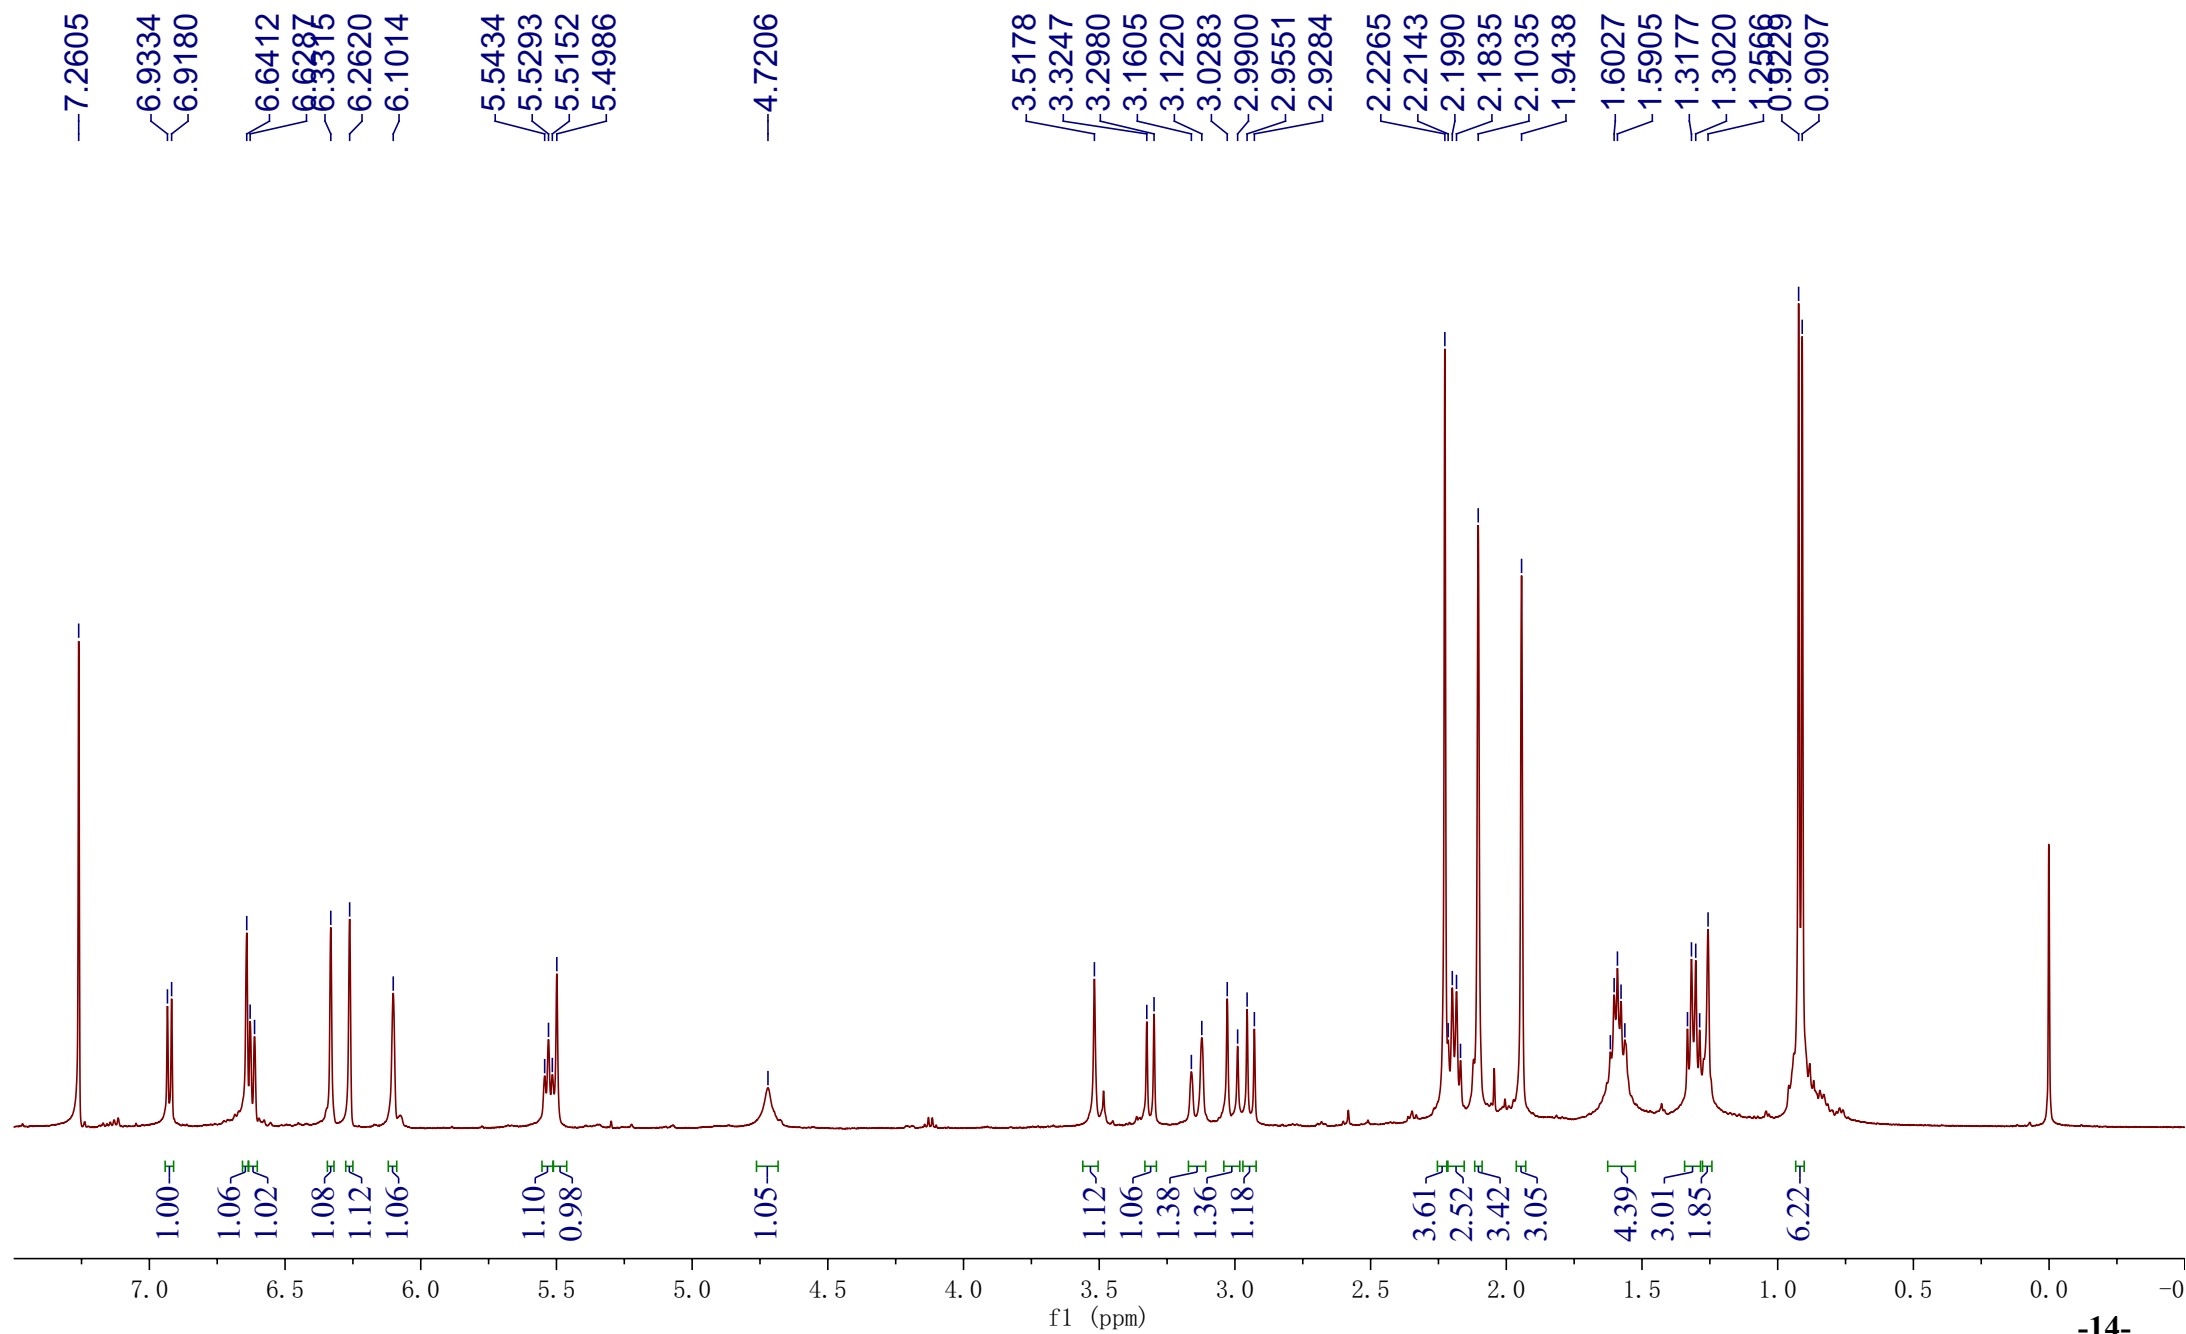

**Figure S3.**  $^{13}\text{C}$  NMR (125 MHz,  $\text{CDCl}_3$ ) Spectrum of Compound **1a**

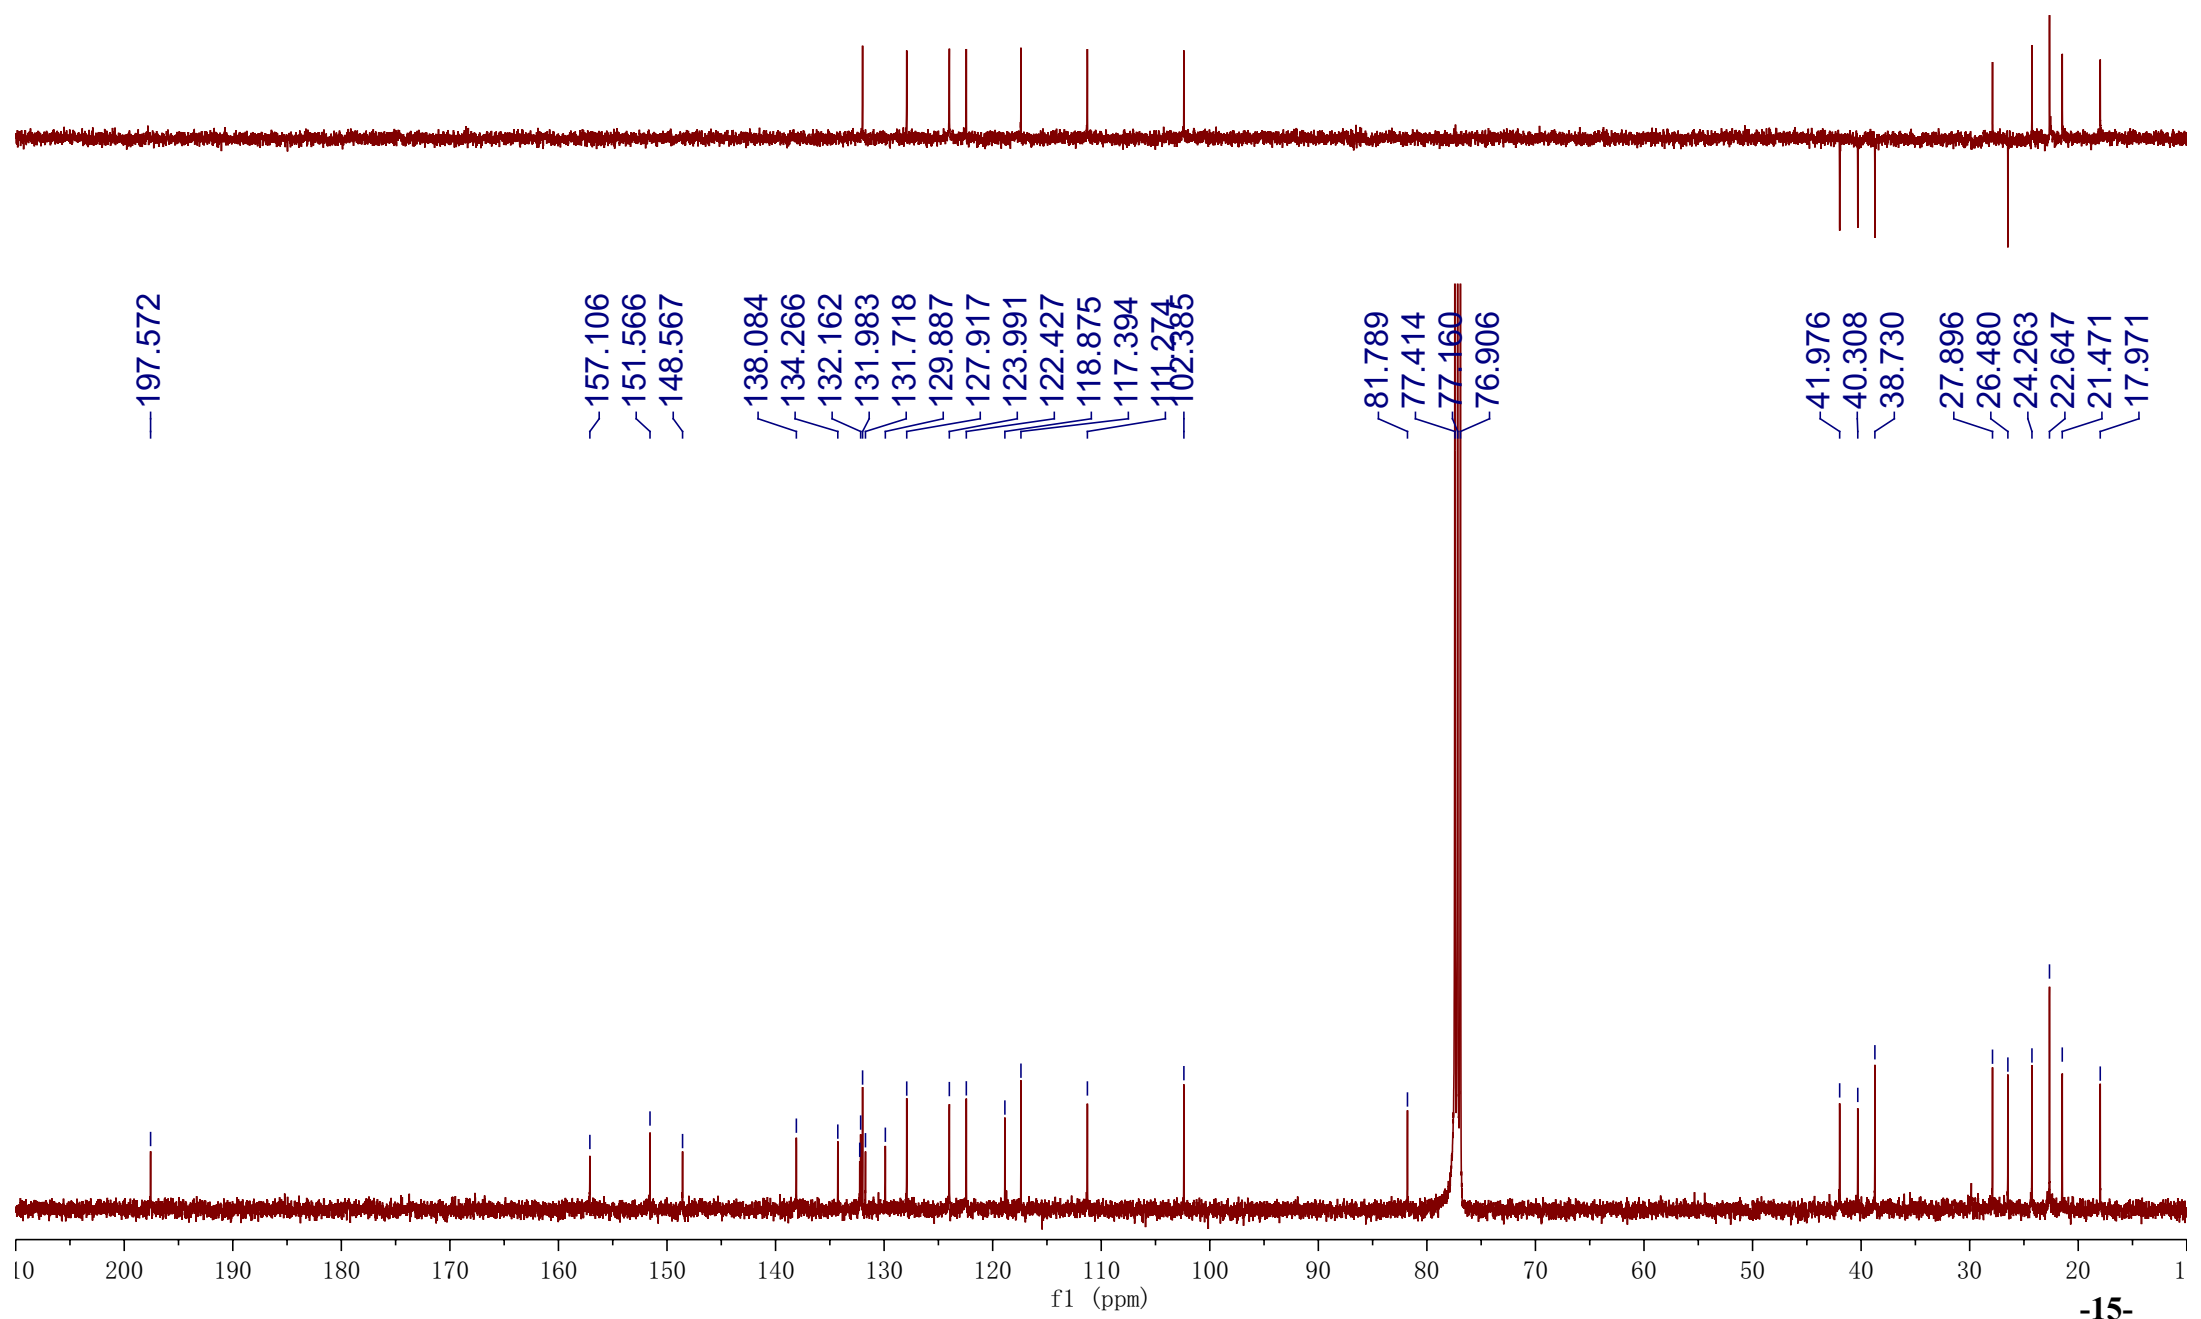

**Figure S4.**  $^1\text{H}$  NMR (500 MHz,  $\text{CDCl}_3$ ) Spectrum of Compound **1b**

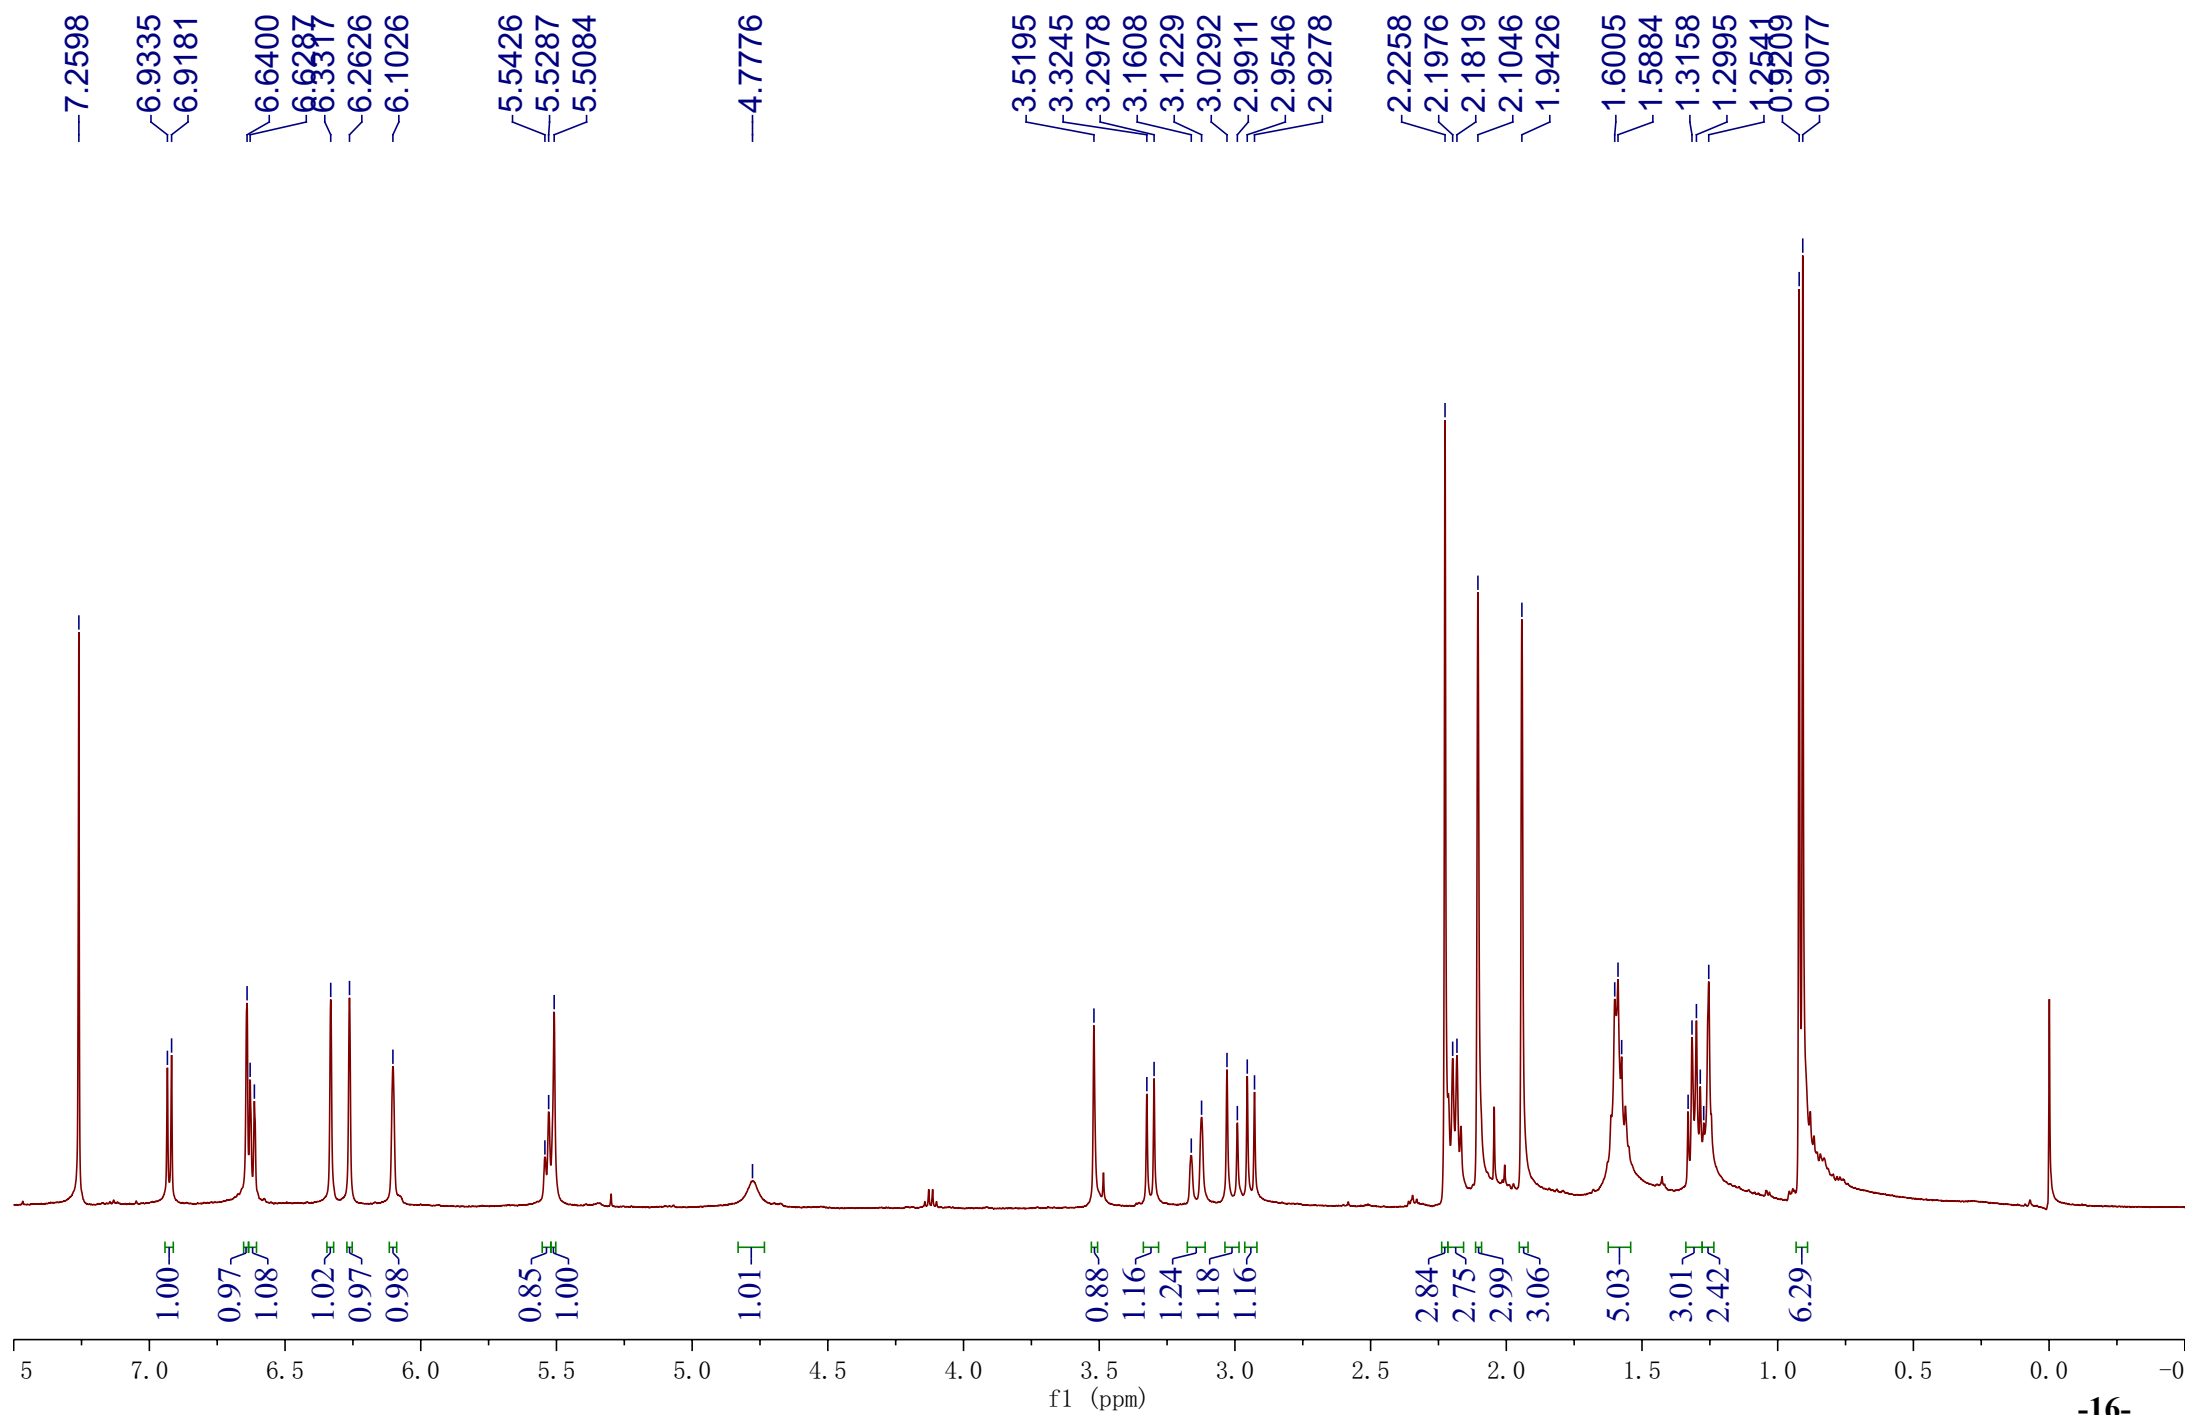

**Figure S5.**  $^{13}\text{C}$  NMR (125 MHz,  $\text{CDCl}_3$ ) Spectrum of Compound **1b**

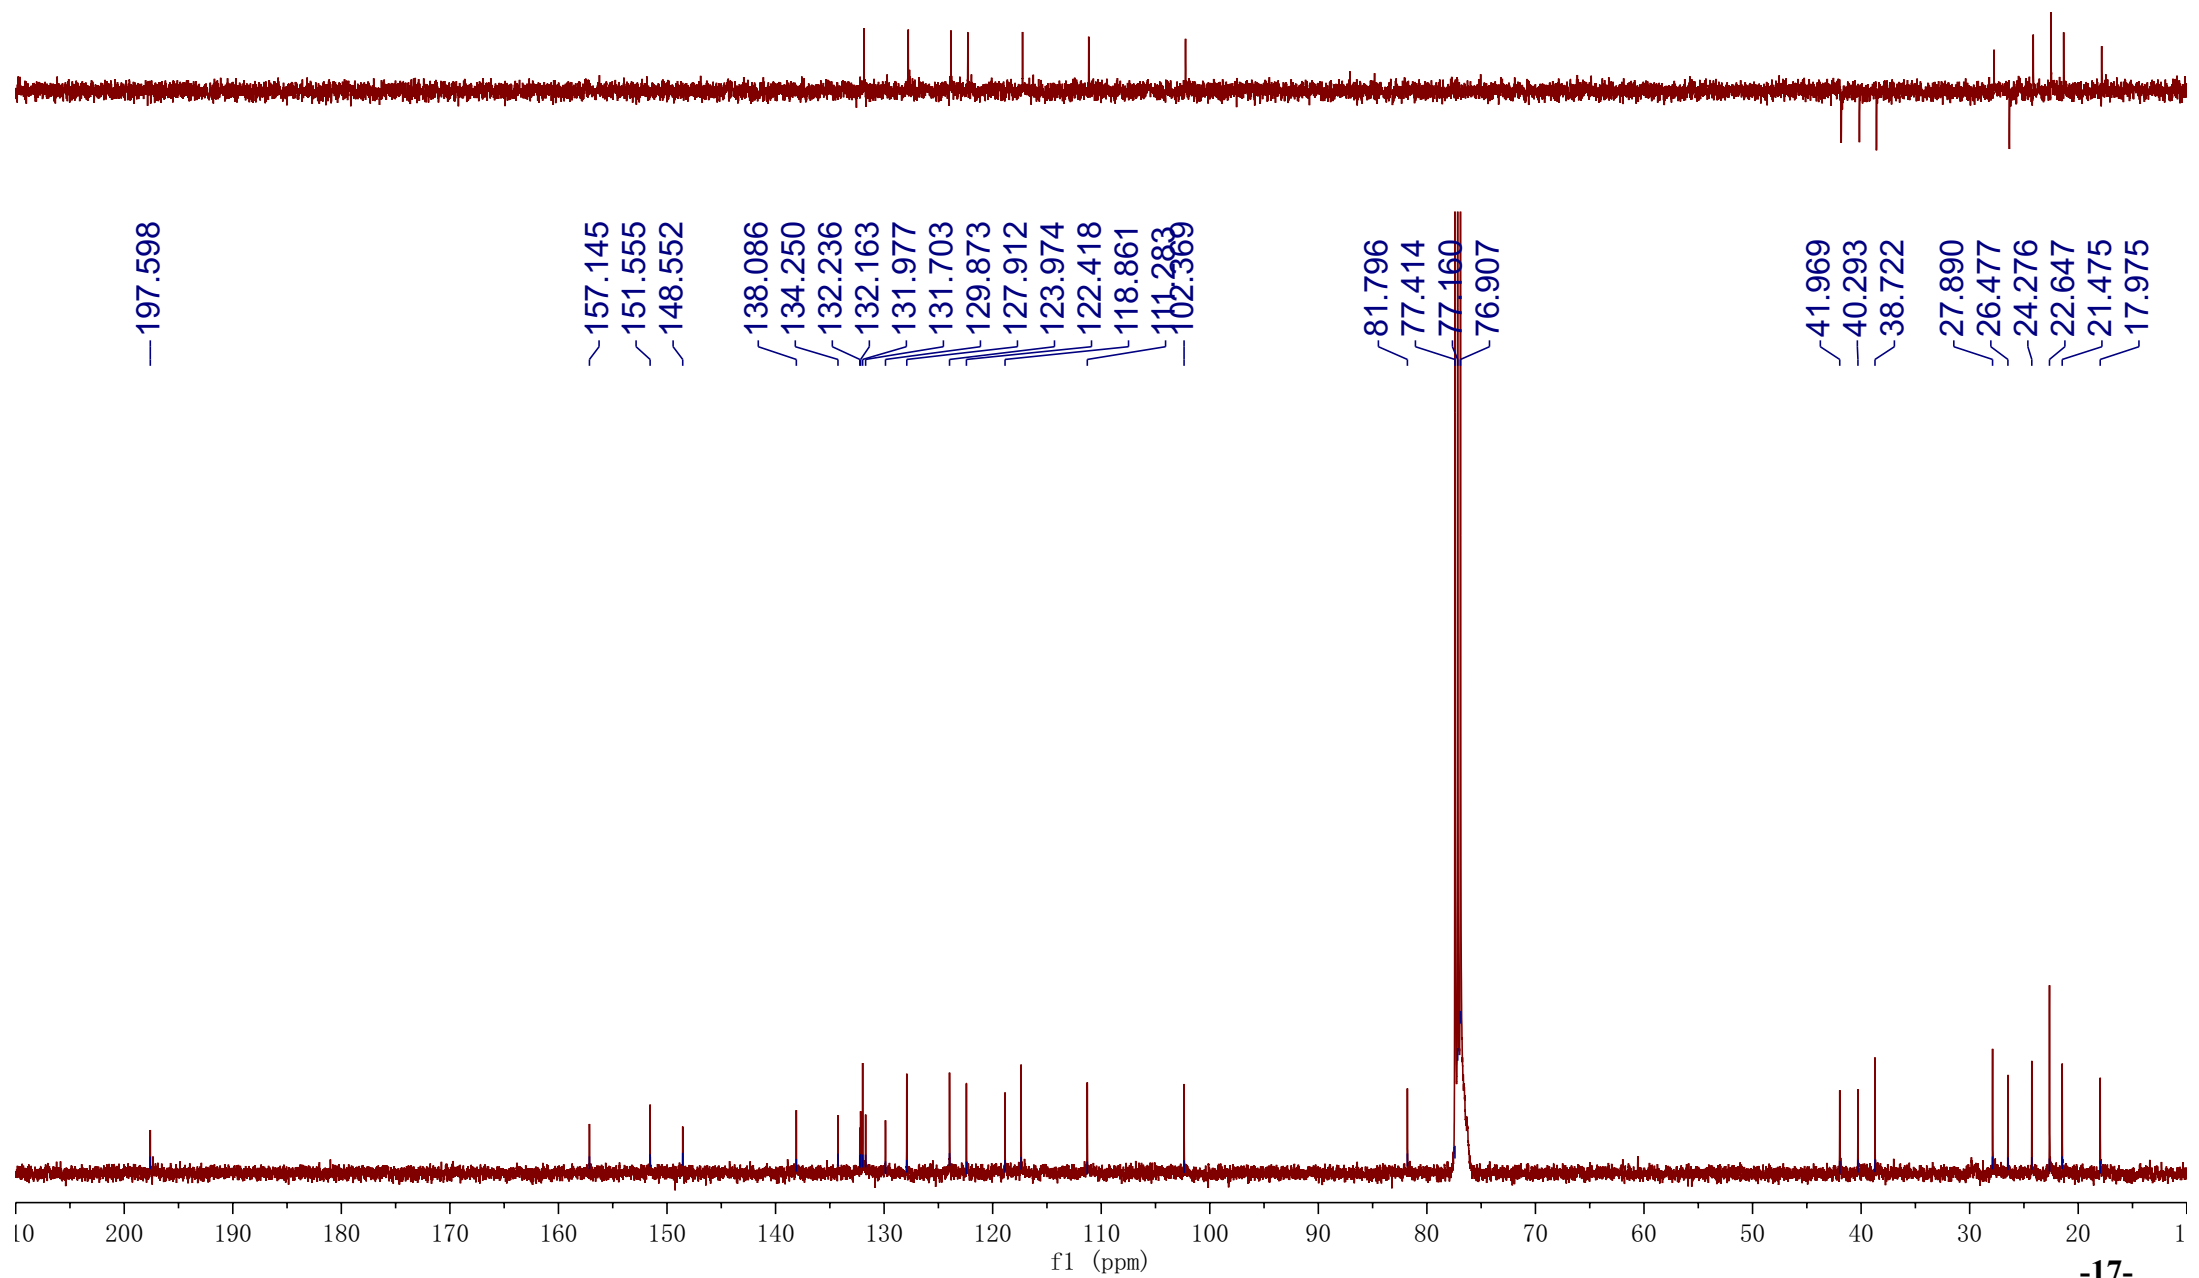

**Figure S6.** HSQC (500 MHz, CDCl<sub>3</sub>) Spectrum of Compound **1b**

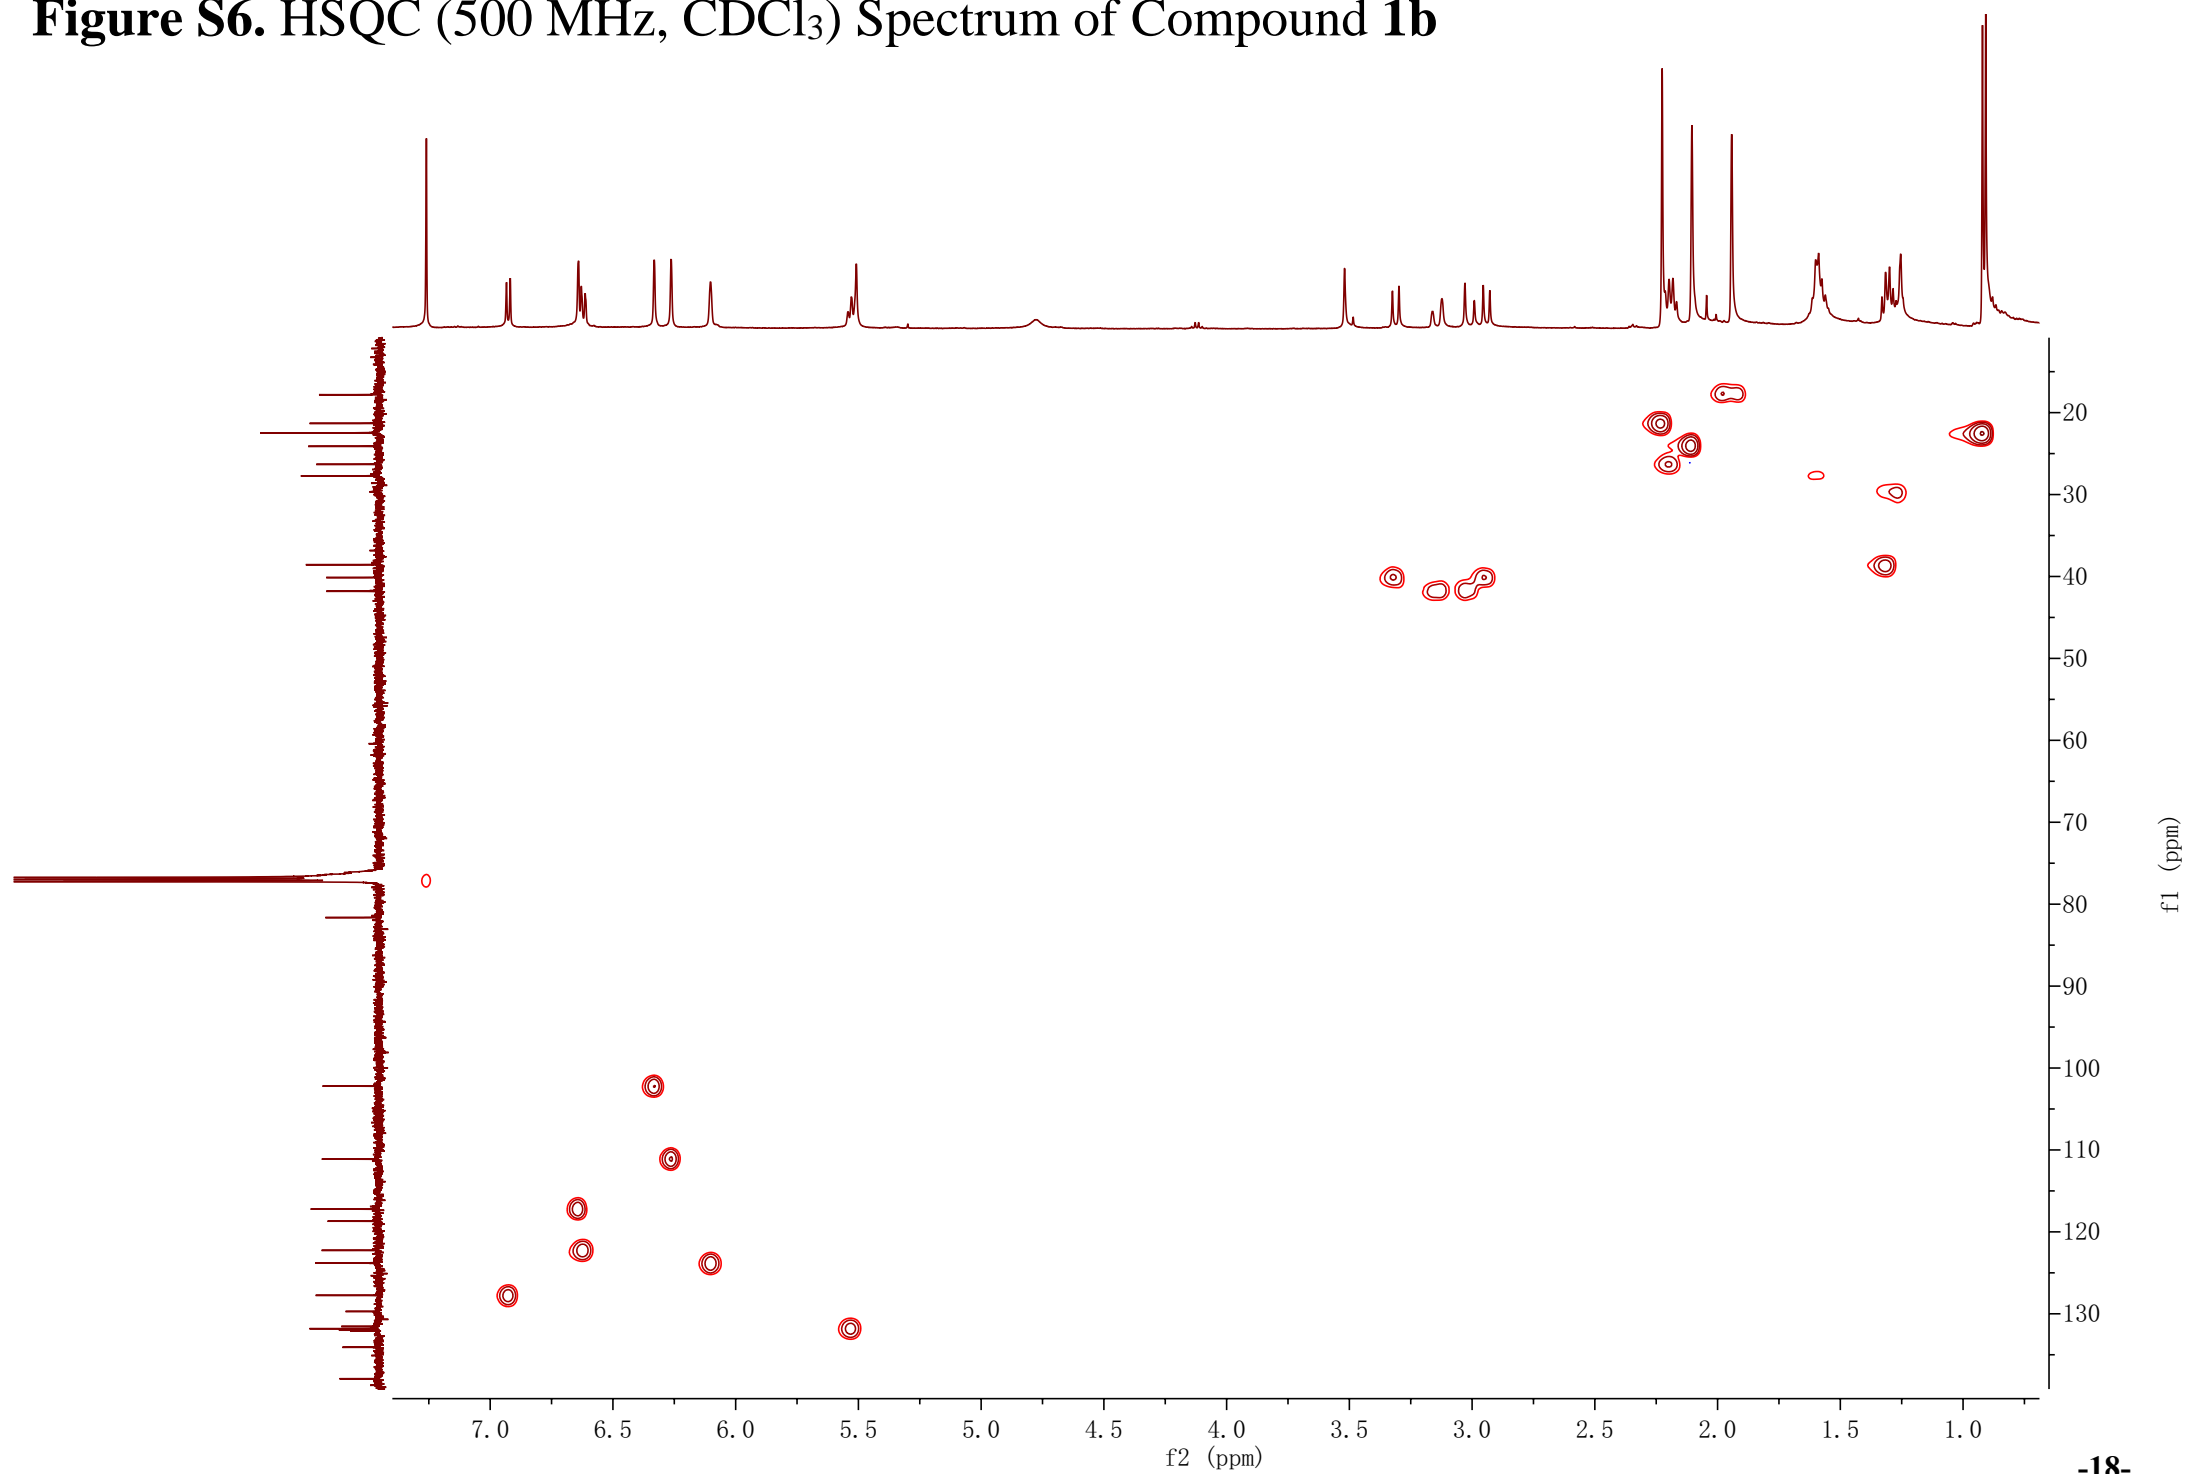

**Figure S7.**  $^1\text{H}$ - $^1\text{H}$  COSY (500 MHz,  $\text{CDCl}_3$ ) Spectrum of Compound **1b**

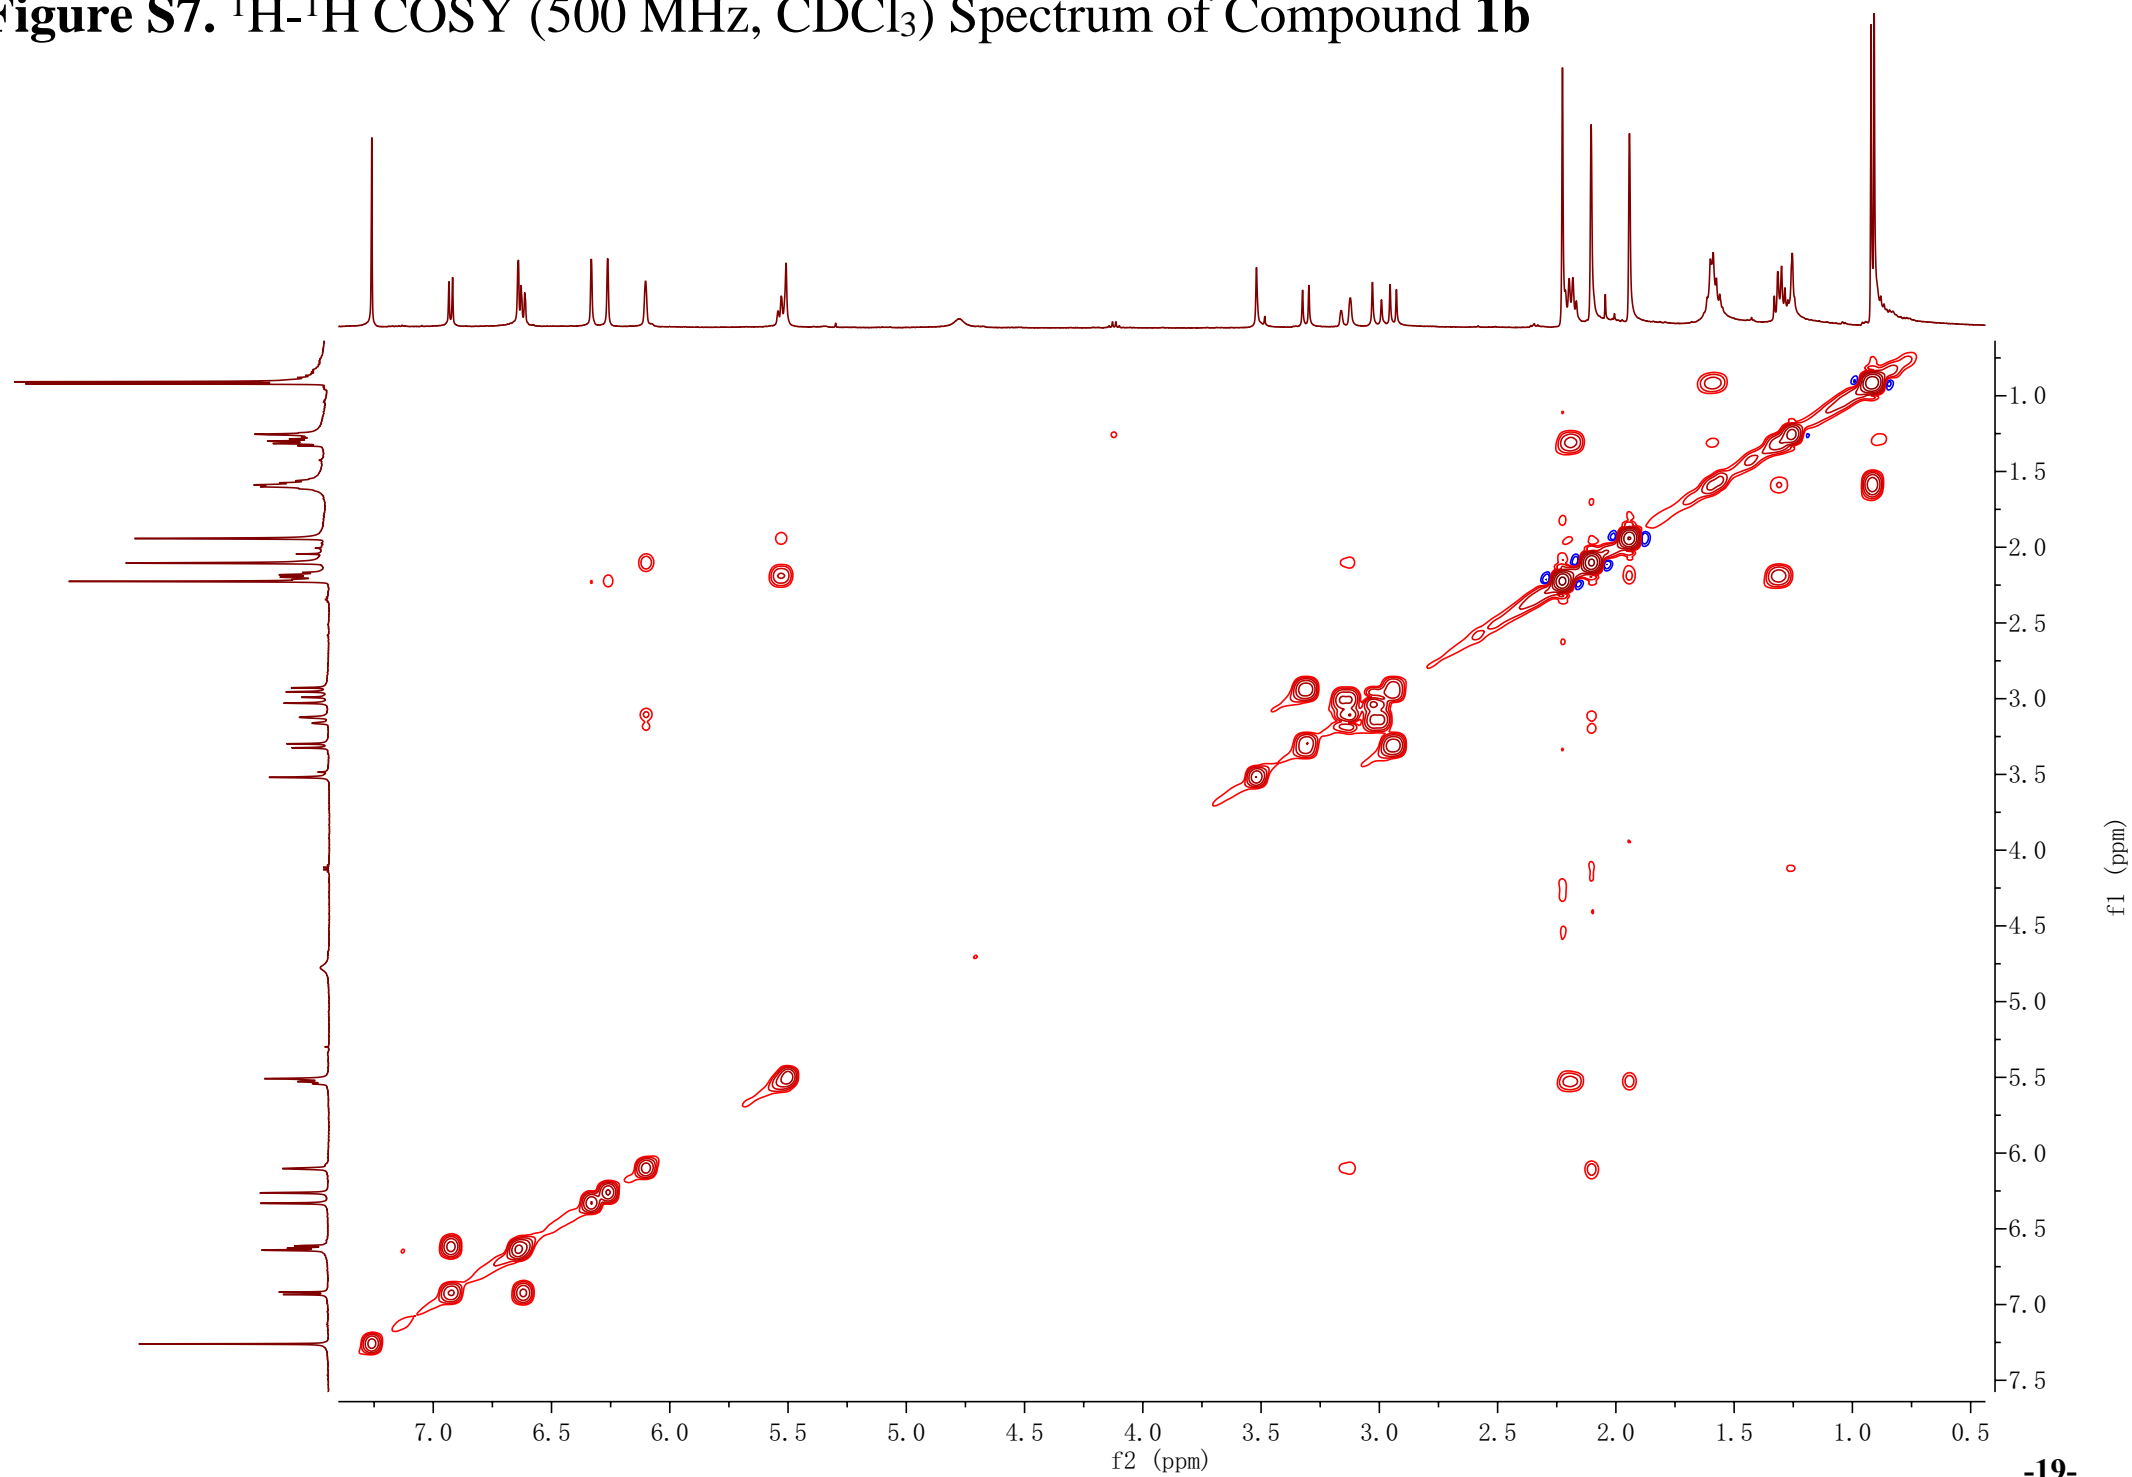

**Figure S8.** HMBC (500 MHz, CDCl<sub>3</sub>) Spectrum of Compound **1b**

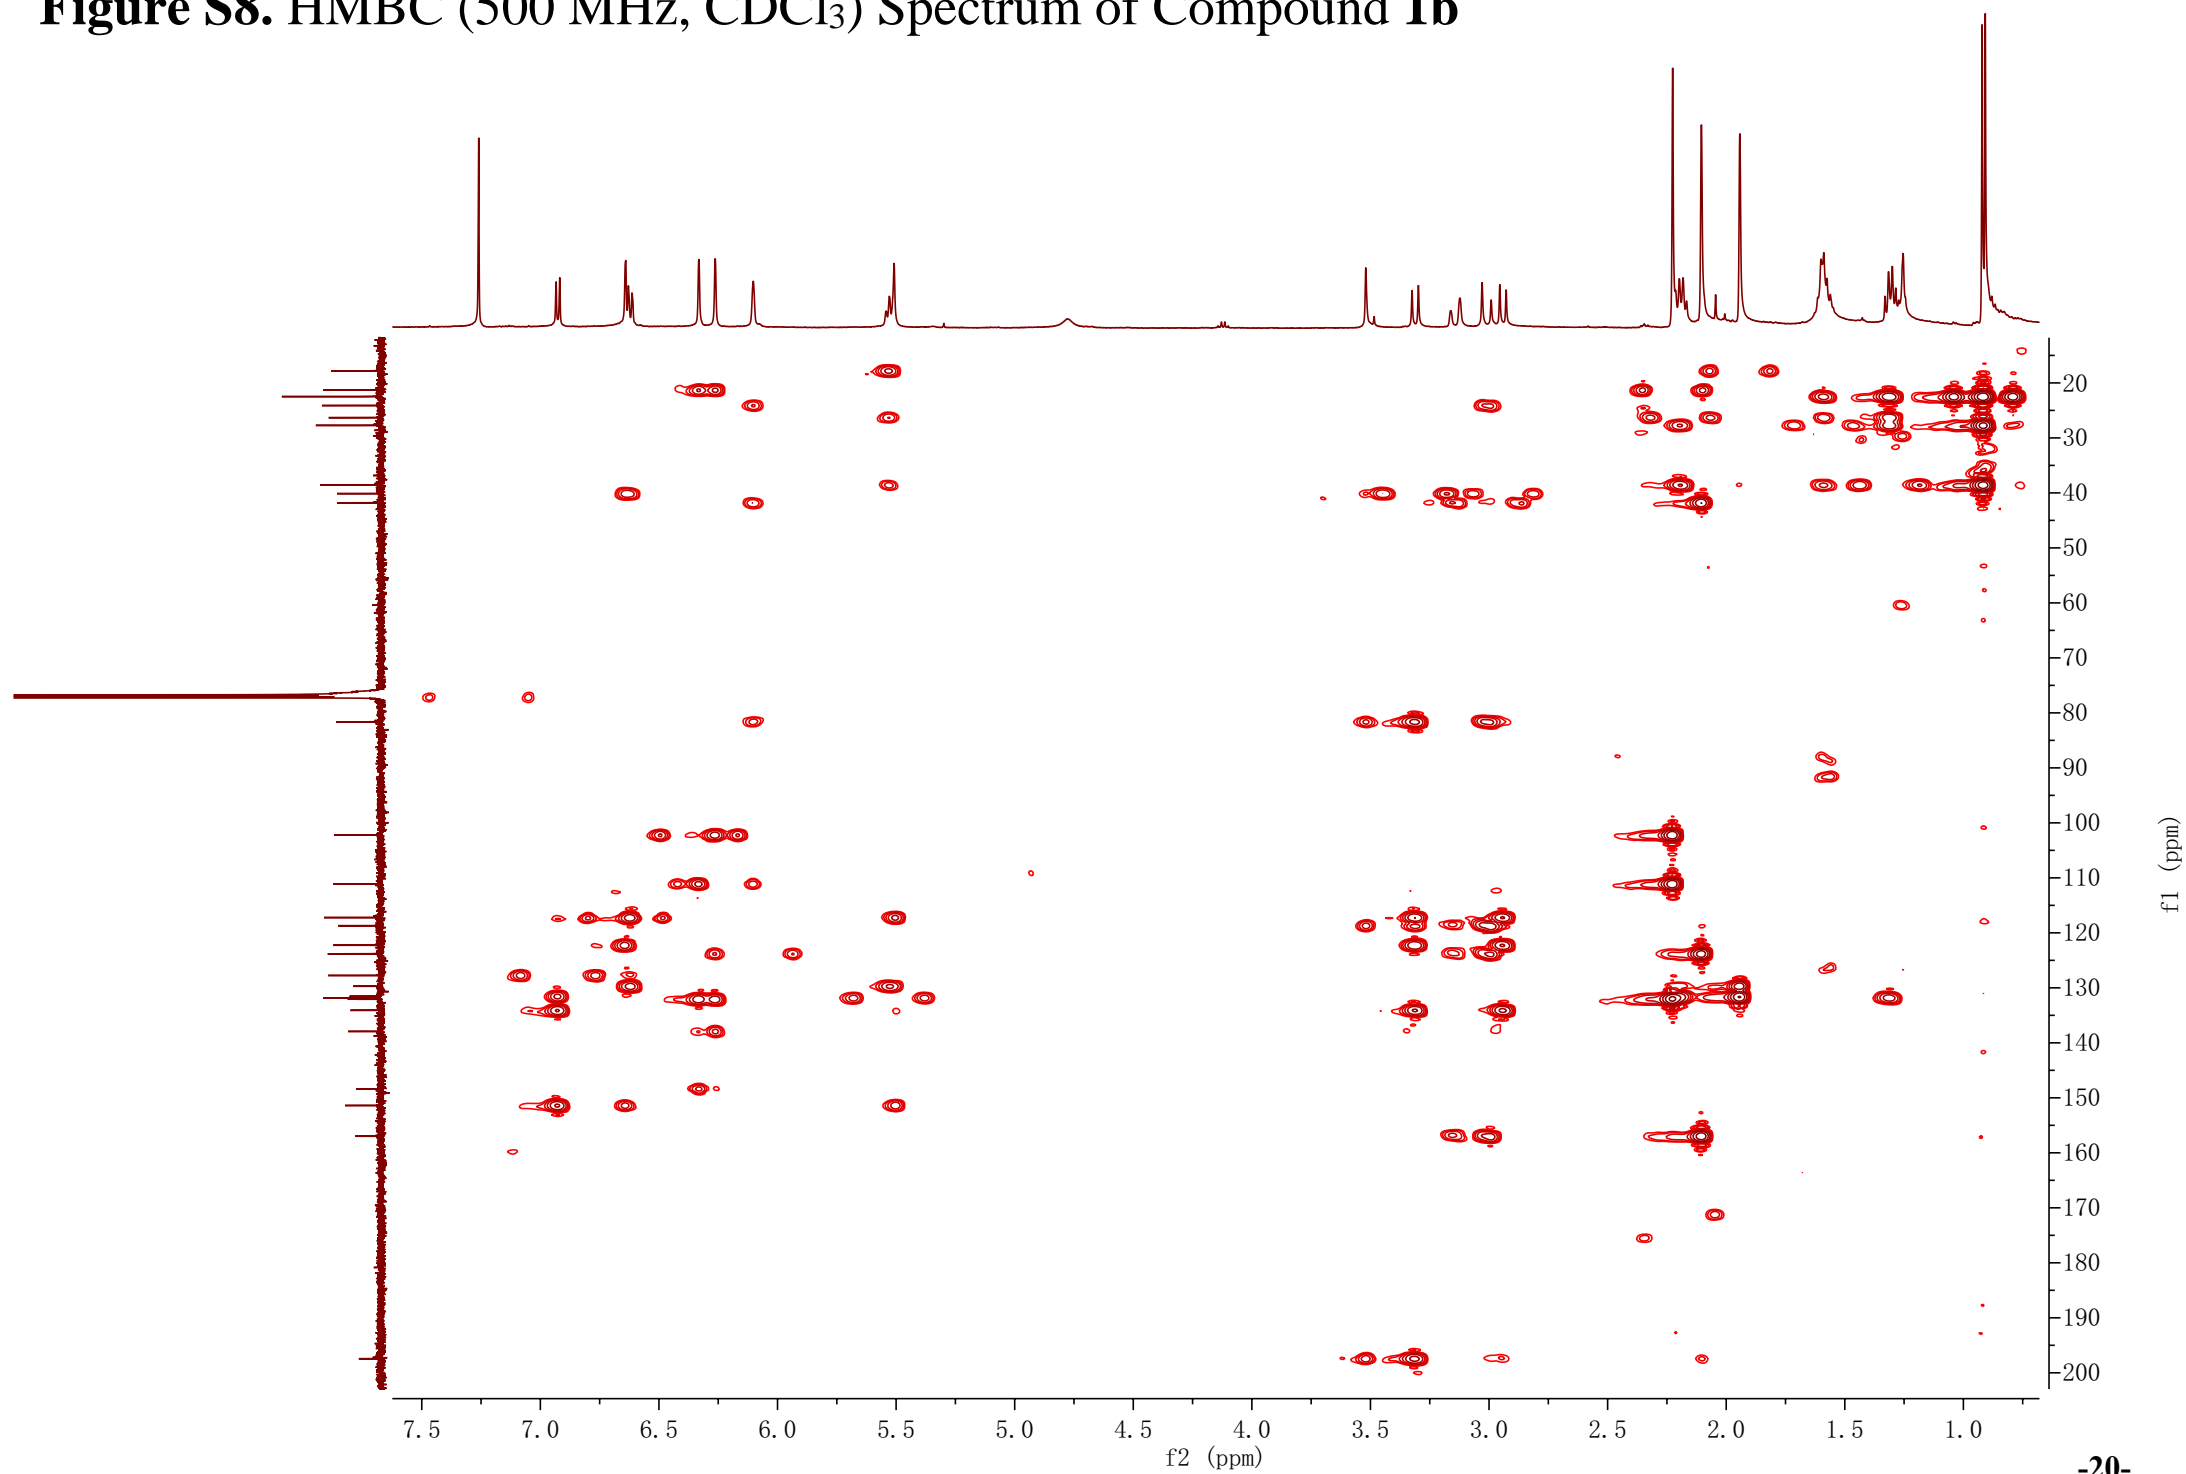



**Figure S9.** NOESY (500 MHz, CDCl<sub>3</sub>) Spectrum of Compound **1b**

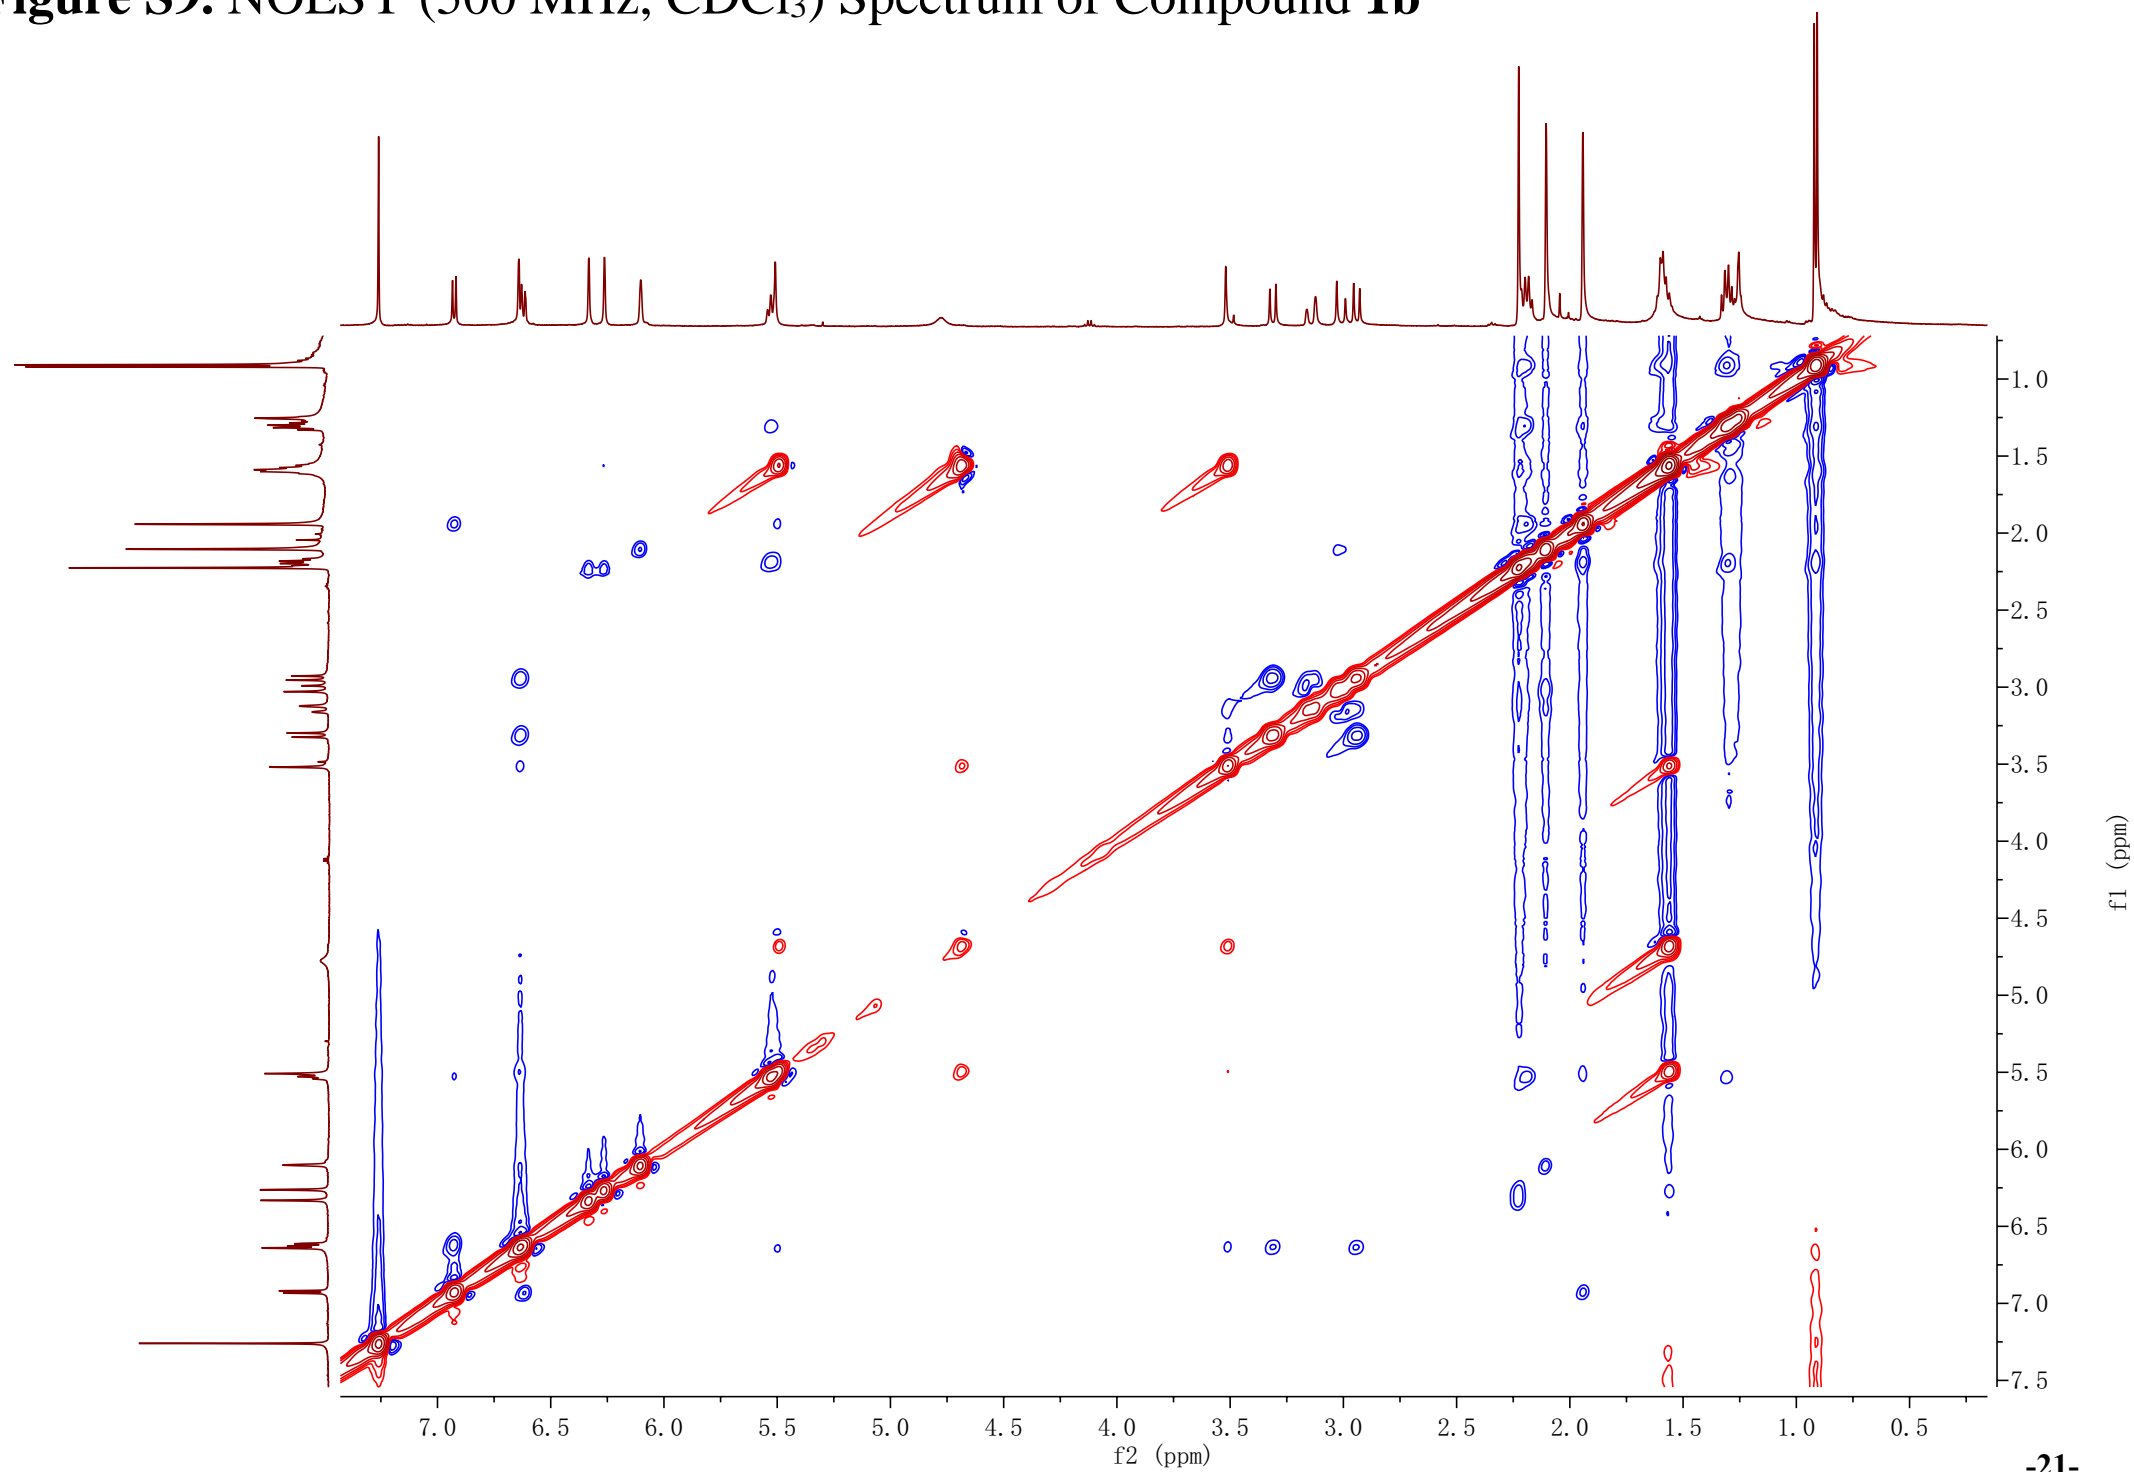

**Figure S10.** HR-ESI-MS (E+) Spectrum of Compound 1

| Elmt | Val. | Min | Max | Elmt | Val. | Min | Max | Elmt | Val. | Min | Max | Use Adduct |
|------|------|-----|-----|------|------|-----|-----|------|------|-----|-----|------------|
| H    | 1    | 30  | 38  | O    | 2    | 6   | 6   | Br   | 1    | 0   | 0   | H          |
| B    | 3    | 0   | 0   | F    | 1    | 0   | 0   | I    | 3    | 0   | 0   | Na         |
| C    | 4    | 29  | 29  | S    | 2    | 0   | 0   |      |      |     |     | K          |
| N    | 3    | 0   | 0   | Cl   | 1    | 0   | 0   |      |      |     |     | NH4        |

Error Margin (mDa): 50.0  
 HC Ratio: 0.0 - 100.0  
 Max Isotopes: all  
 MSn Iso RI (%): 75.00

DBE Range: -100.0 - 200.0  
 Apply N Rule: no  
 Isotope RI (%): 1.00  
 MSn Logic Mode: OR

Electron Ions: both  
 Use MSn Info: no  
 Isotope Res: 10000  
 Max Results: 1000

Event#: 1 MS(E+) Ret. Time : 0.983 Scan#: 147

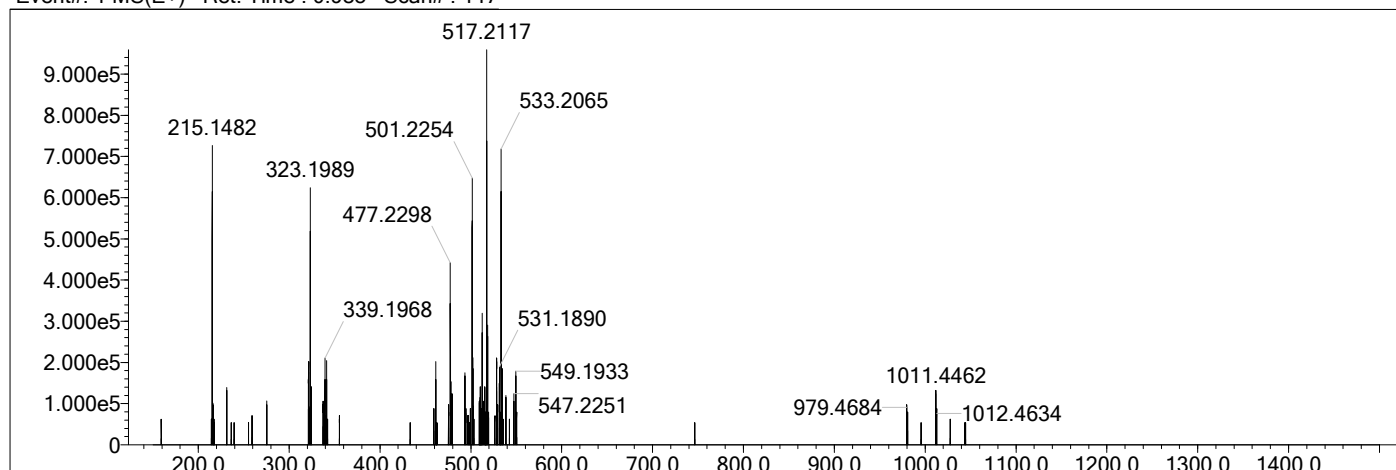

Measured region for 501.2254 m/z

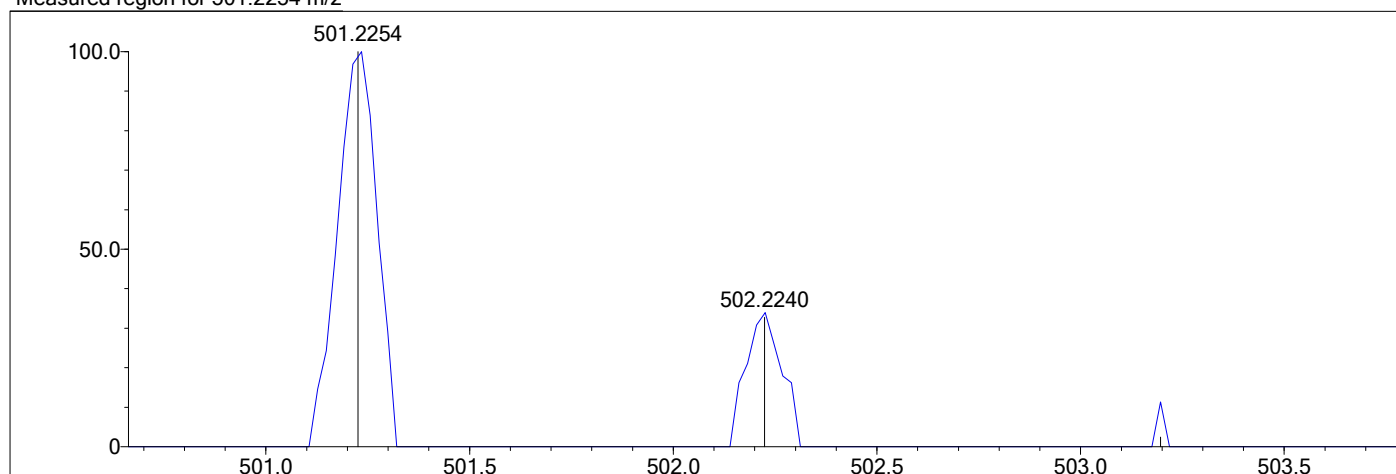

C29 H34 O6 [M+Na]+ : Predicted region for 501.2248 m/z

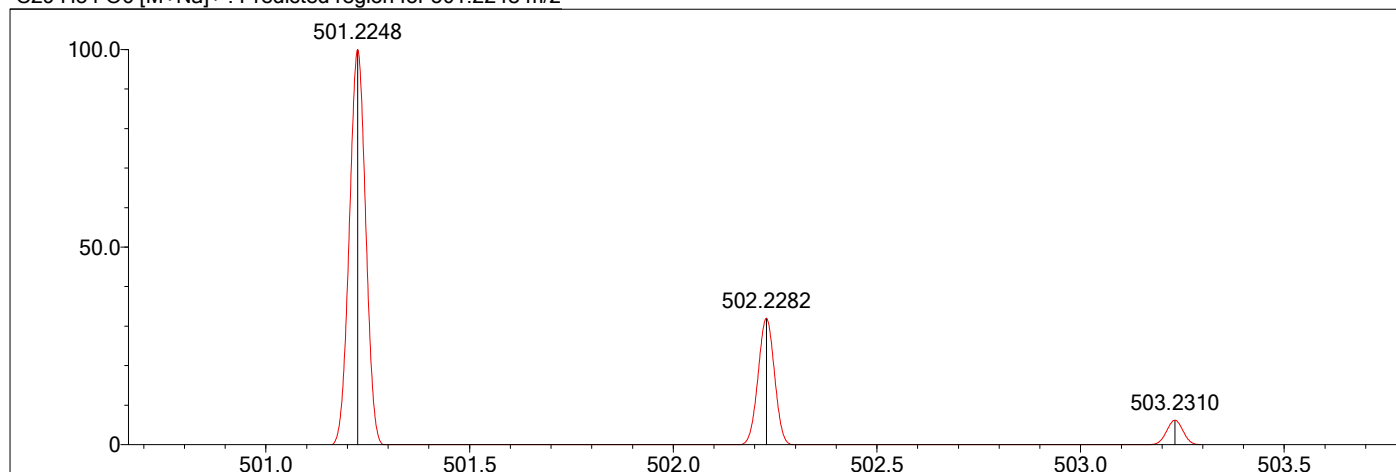

| Rank | Score | Formula (M) | Ion     | Meas. m/z | Pred. m/z | Df. (mDa) | Df. (ppm) | Iso   | DBE  |
|------|-------|-------------|---------|-----------|-----------|-----------|-----------|-------|------|
| 1    | 87.80 | C29 H34 O6  | [M+Na]+ | 501.2254  | 501.2248  | 0.6       | 1.20      | 88.24 | 13.0 |

Figure S11. HR-ESI-MS (E-) Spectrum of Compound 1

| Elmt | Val. | Min | Max | Elmt | Val. | Min | Max | Elmt | Val. | Min | Max | Use Adduct |
|------|------|-----|-----|------|------|-----|-----|------|------|-----|-----|------------|
| H    | 1    | 30  | 38  | O    | 2    | 6   | 6   | Br   | 1    | 0   | 0   | H          |
| B    | 3    | 0   | 0   | F    | 1    | 0   | 0   | I    | 3    | 0   | 0   | HCOO       |
| C    | 4    | 29  | 29  | S    | 2    | 0   | 0   |      |      |     |     | CH3COO     |
| N    | 3    | 0   | 0   | Cl   | 1    | 0   | 0   |      |      |     |     | Cl         |

Error Margin (mDa): 50.0 DBE Range: -100.0 - 200.0 Electron Ions: both  
HC Ratio: 0.0 - 100.0 Apply N Rule: no Use MSn Info: no  
Max Isotopes: all Isotope RI (%): 1.00 Isotope Res: 10000  
MSn Iso RI (%): 75.00 MSn Logic Mode: OR Max Results: 1000

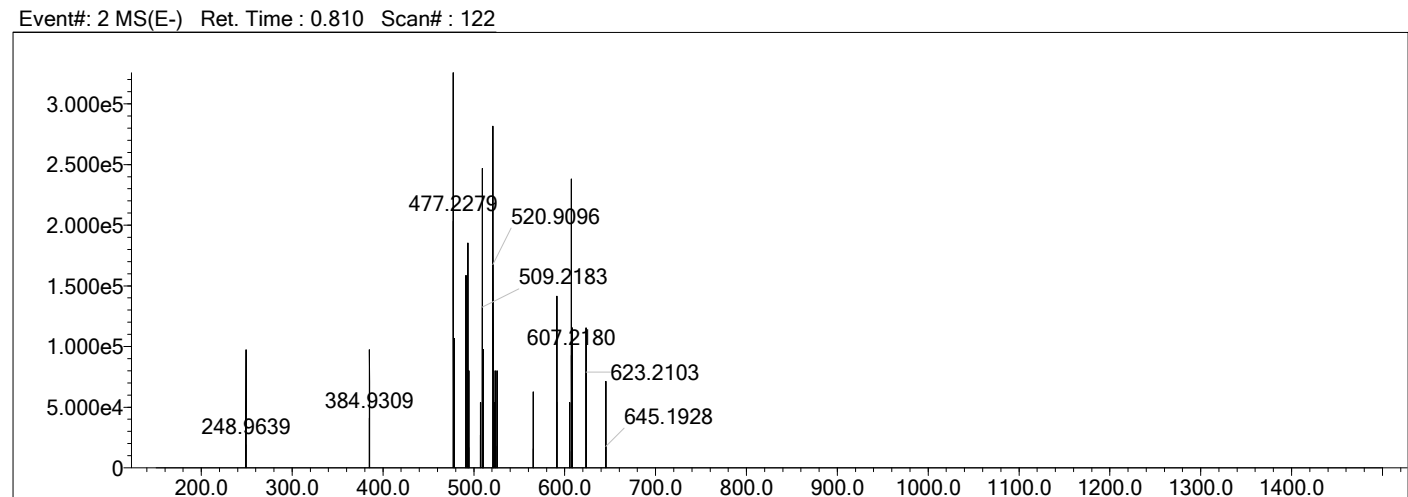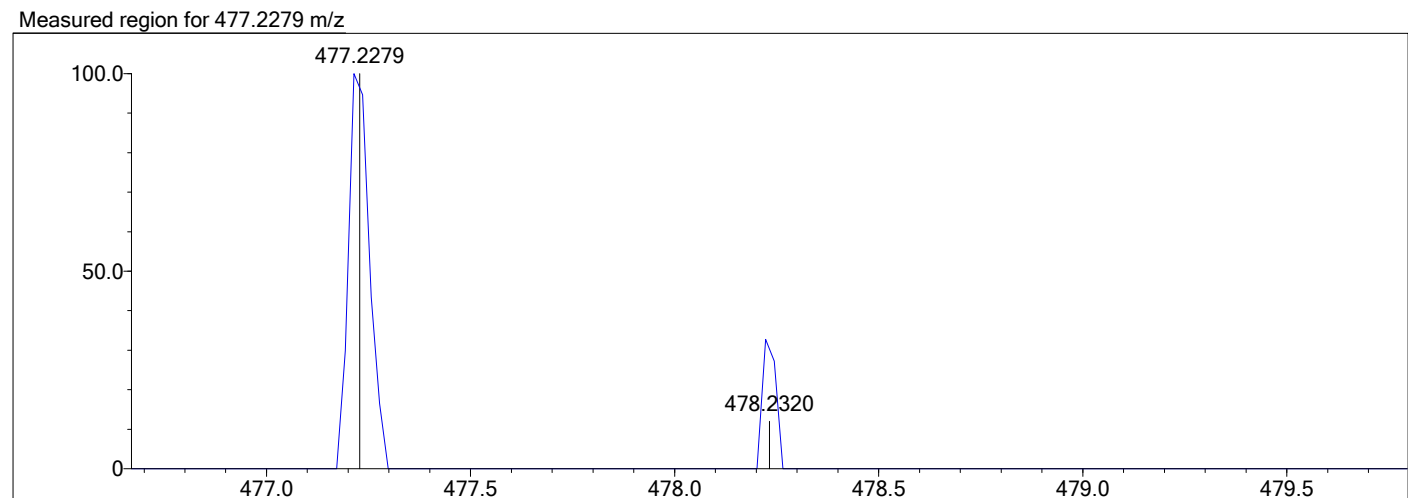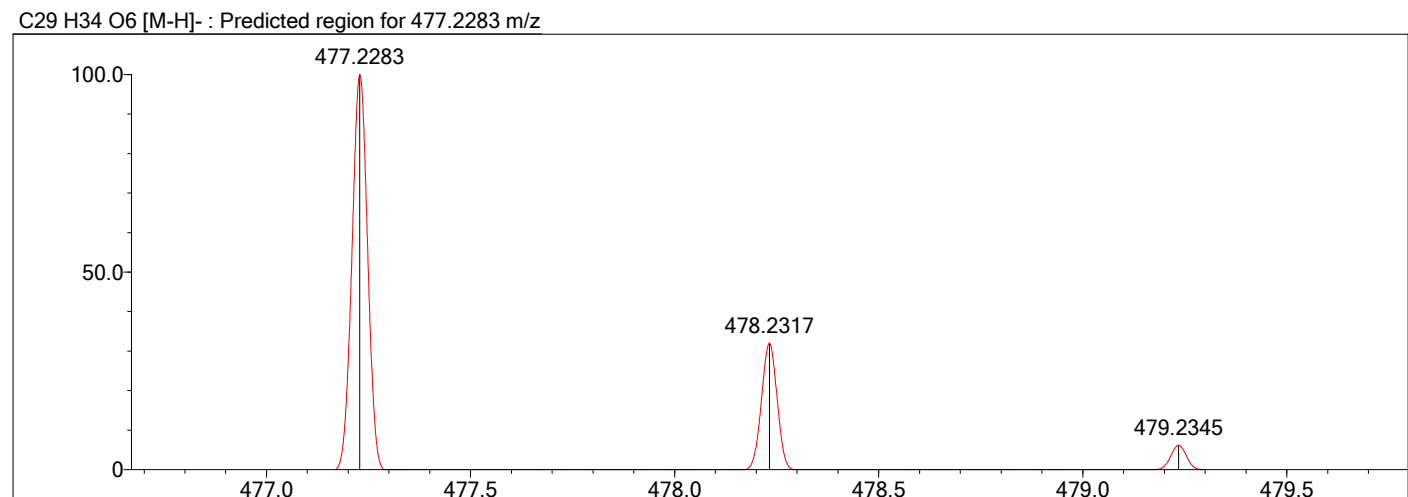

| Rank | Score | Formula (M) | Ion    | Meas. m/z | Pred. m/z | Df. (mDa) | Df. (ppm) | Iso   | DBE  |
|------|-------|-------------|--------|-----------|-----------|-----------|-----------|-------|------|
| 1    | 84.64 | C29 H34 O6  | [M-H]- | 477.2279  | 477.2283  | -0.4      | -0.84     | 84.64 | 13.0 |

**Figure S12.**  $^1\text{H}$  NMR (400 MHz,  $\text{CDCl}_3$ ) Spectrum of Compound **2**

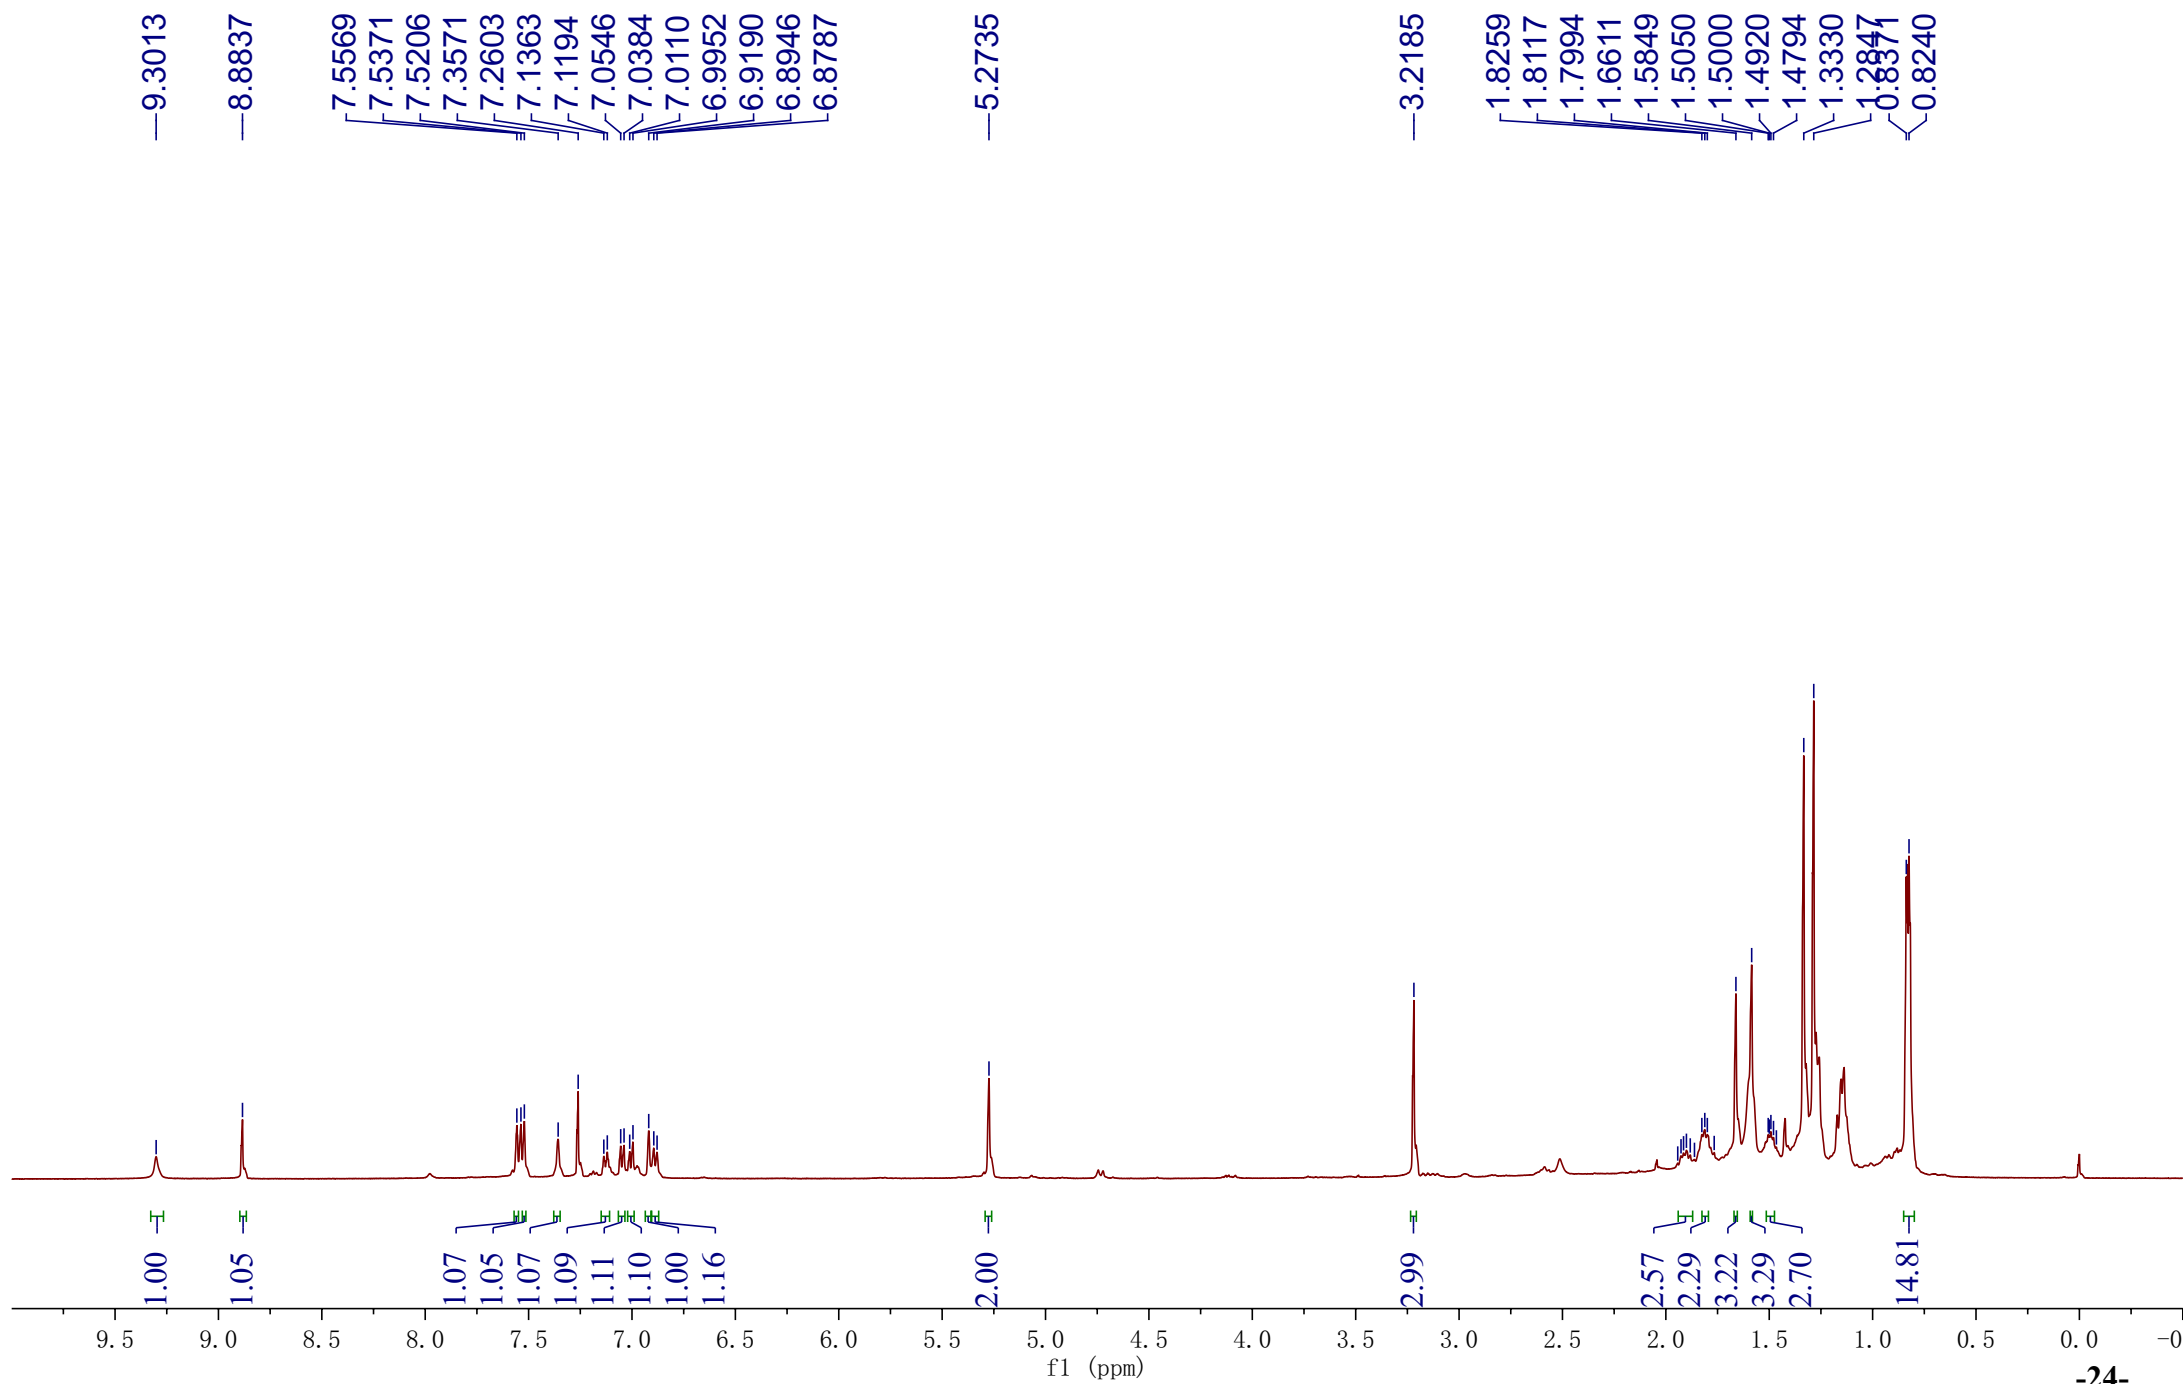

**Figure S13.**  $^{13}\text{C}$  NMR (100 MHz,  $\text{CDCl}_3$ ) Spectrum of Compound 2

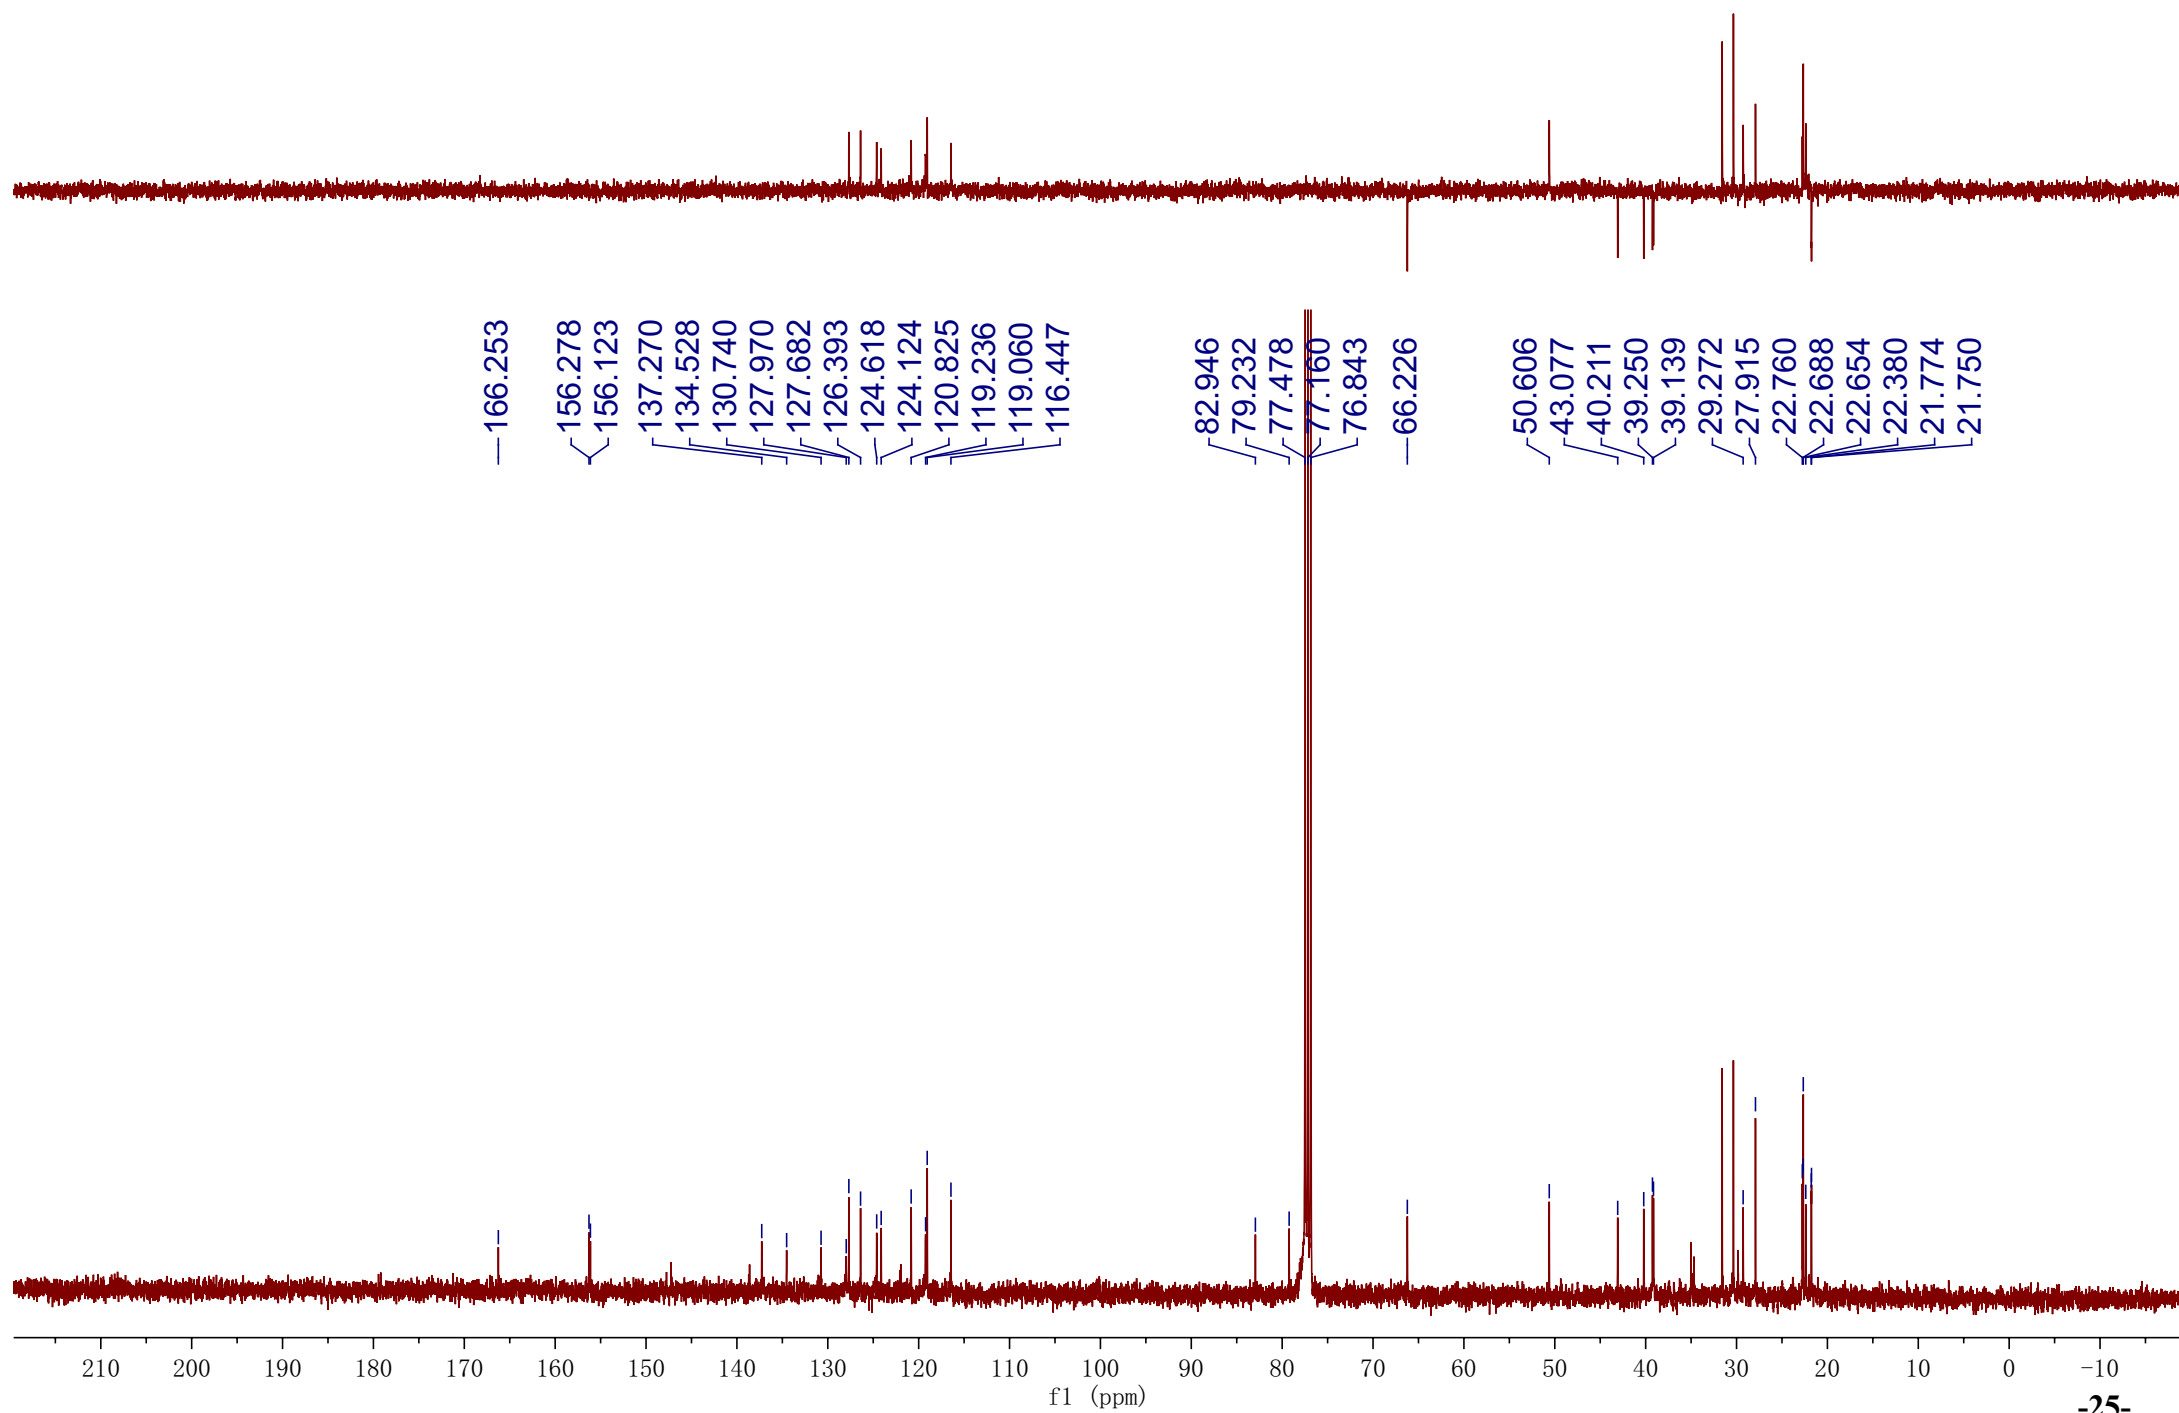

**Figure S14.** HSQC (400 MHz,  $\text{CDCl}_3$ ) Spectrum of Compound **2**

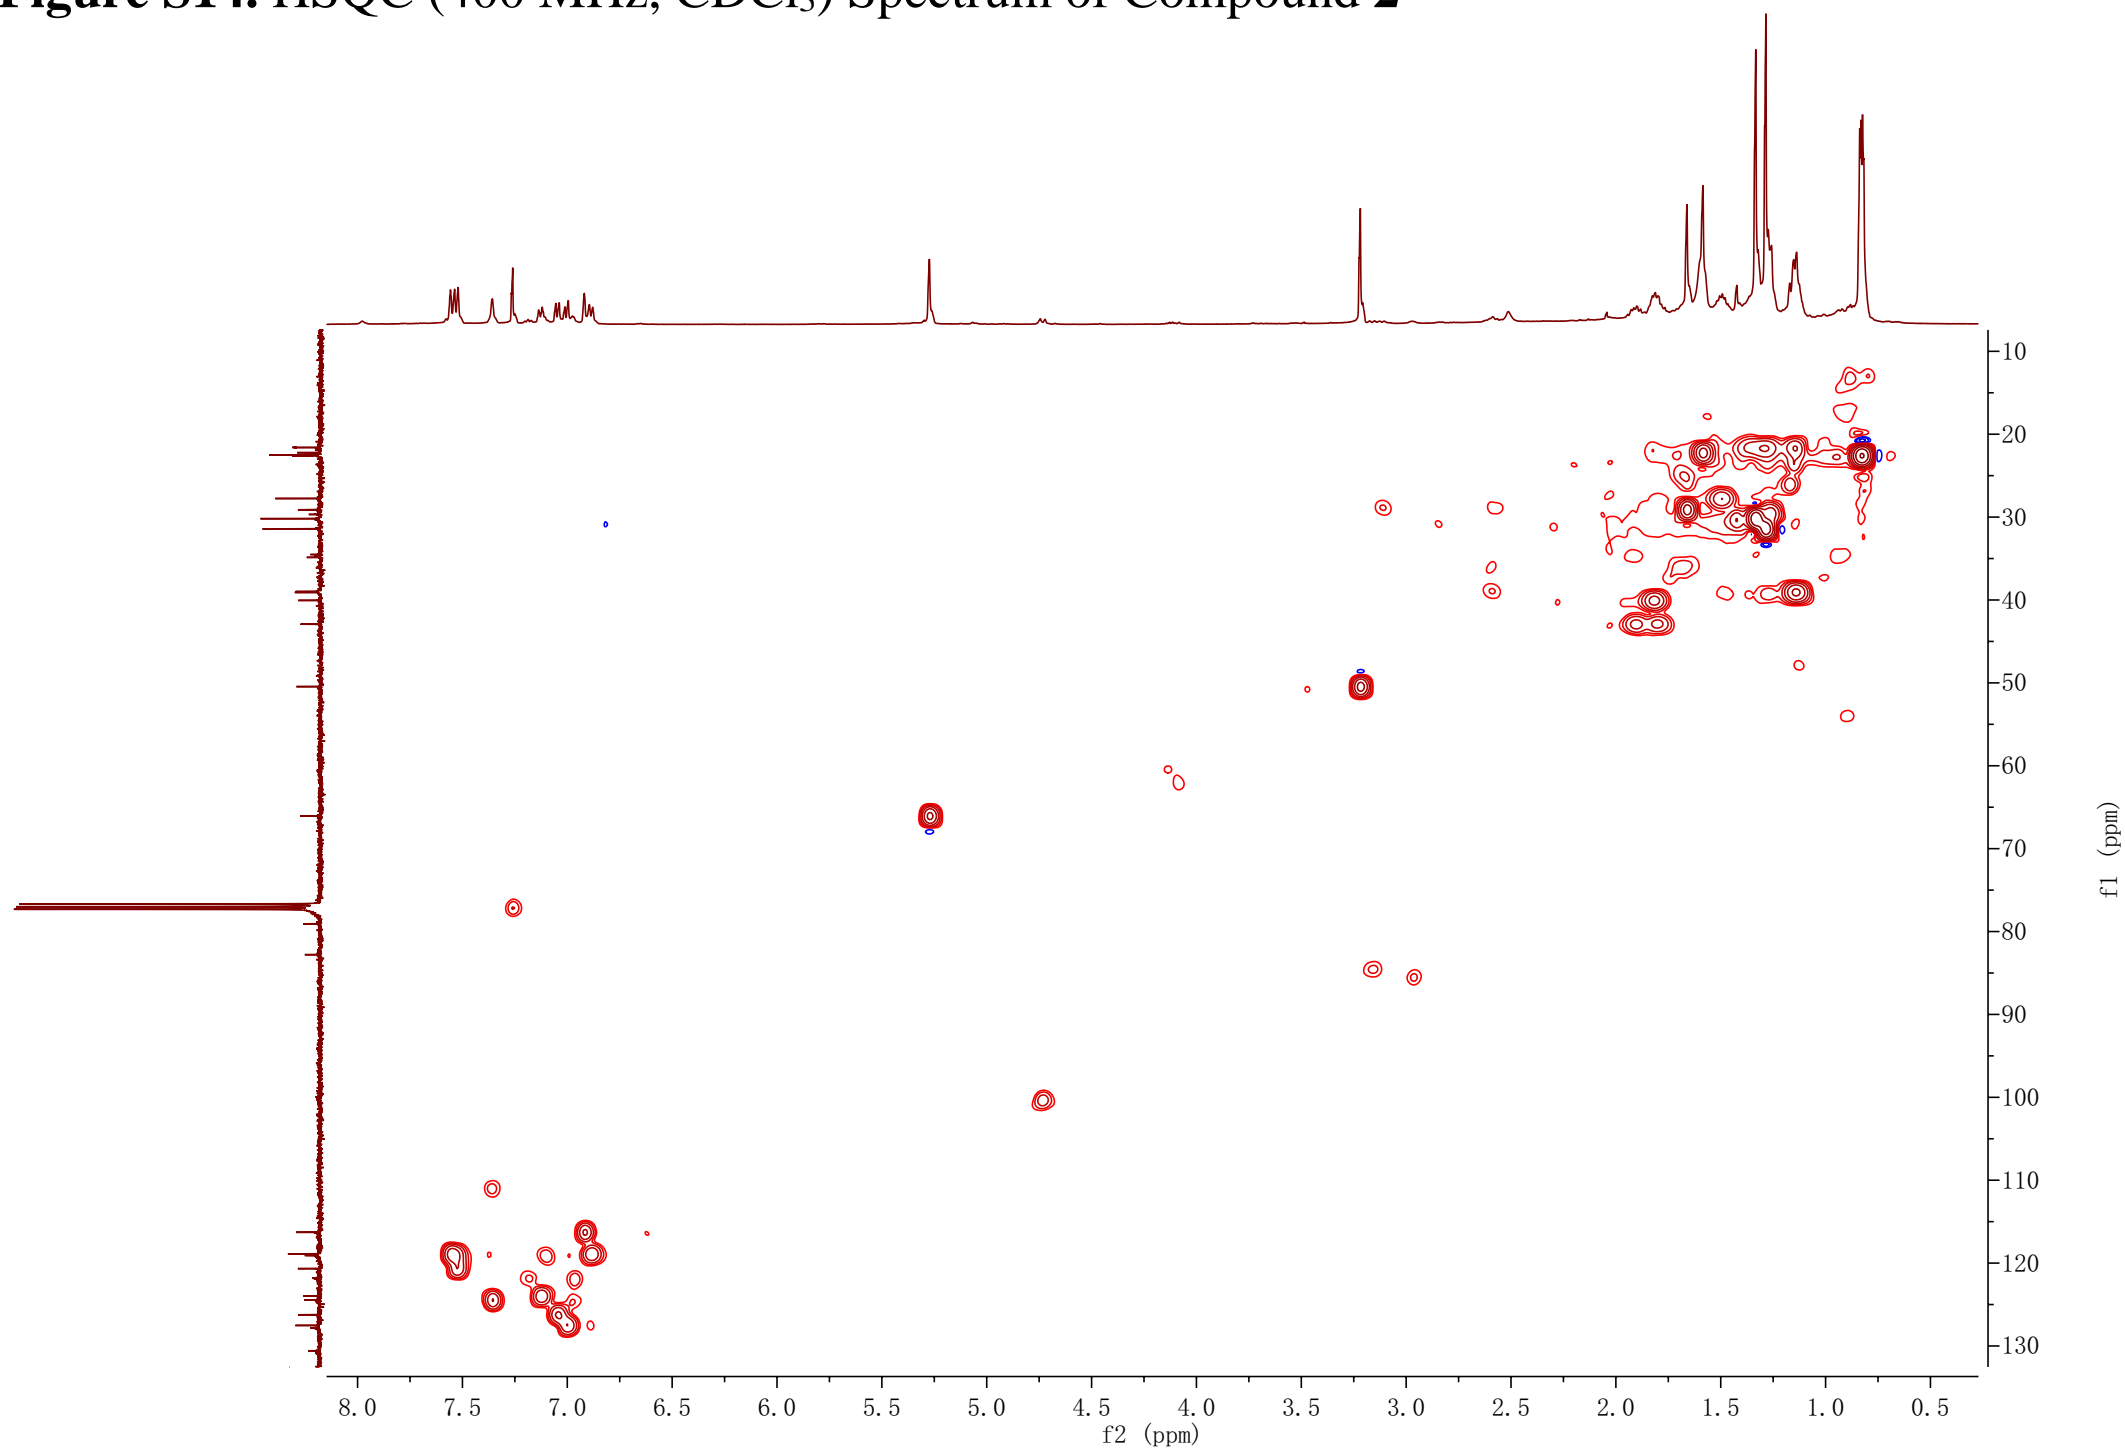

**Figure S15.**  $^1\text{H}$ - $^1\text{H}$  COSY (400 MHz,  $\text{CDCl}_3$ ) Spectrum of Compound **2**

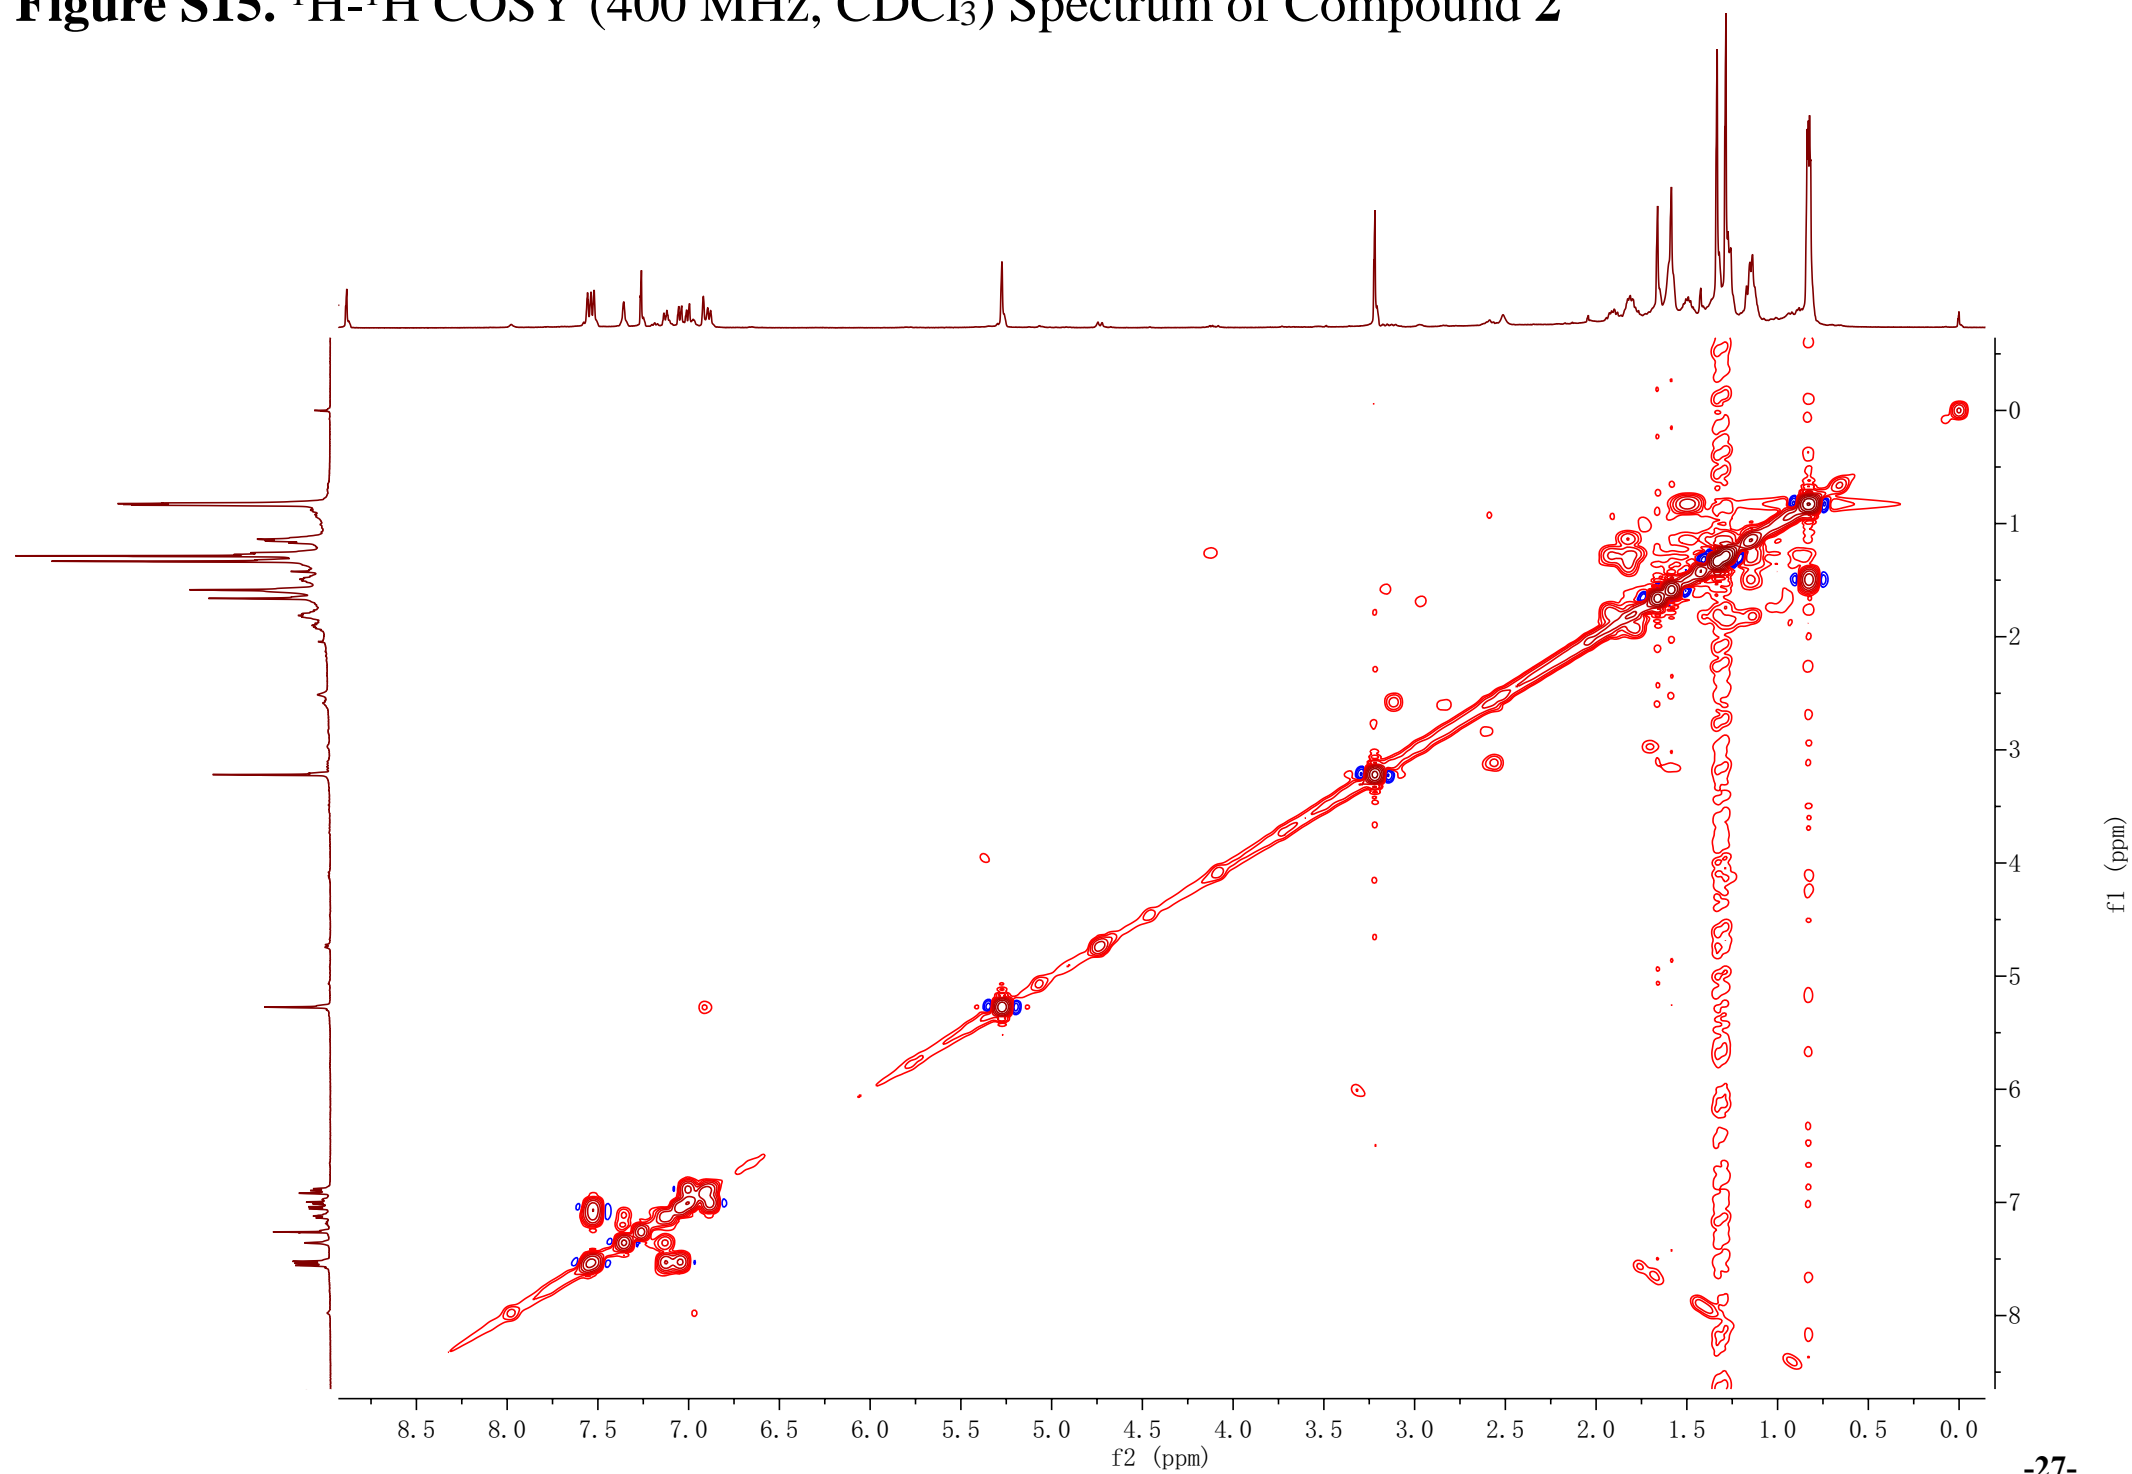

**Figure S16.** HMBC (400 MHz, CDCl<sub>3</sub>) Spectrum of Compound 2

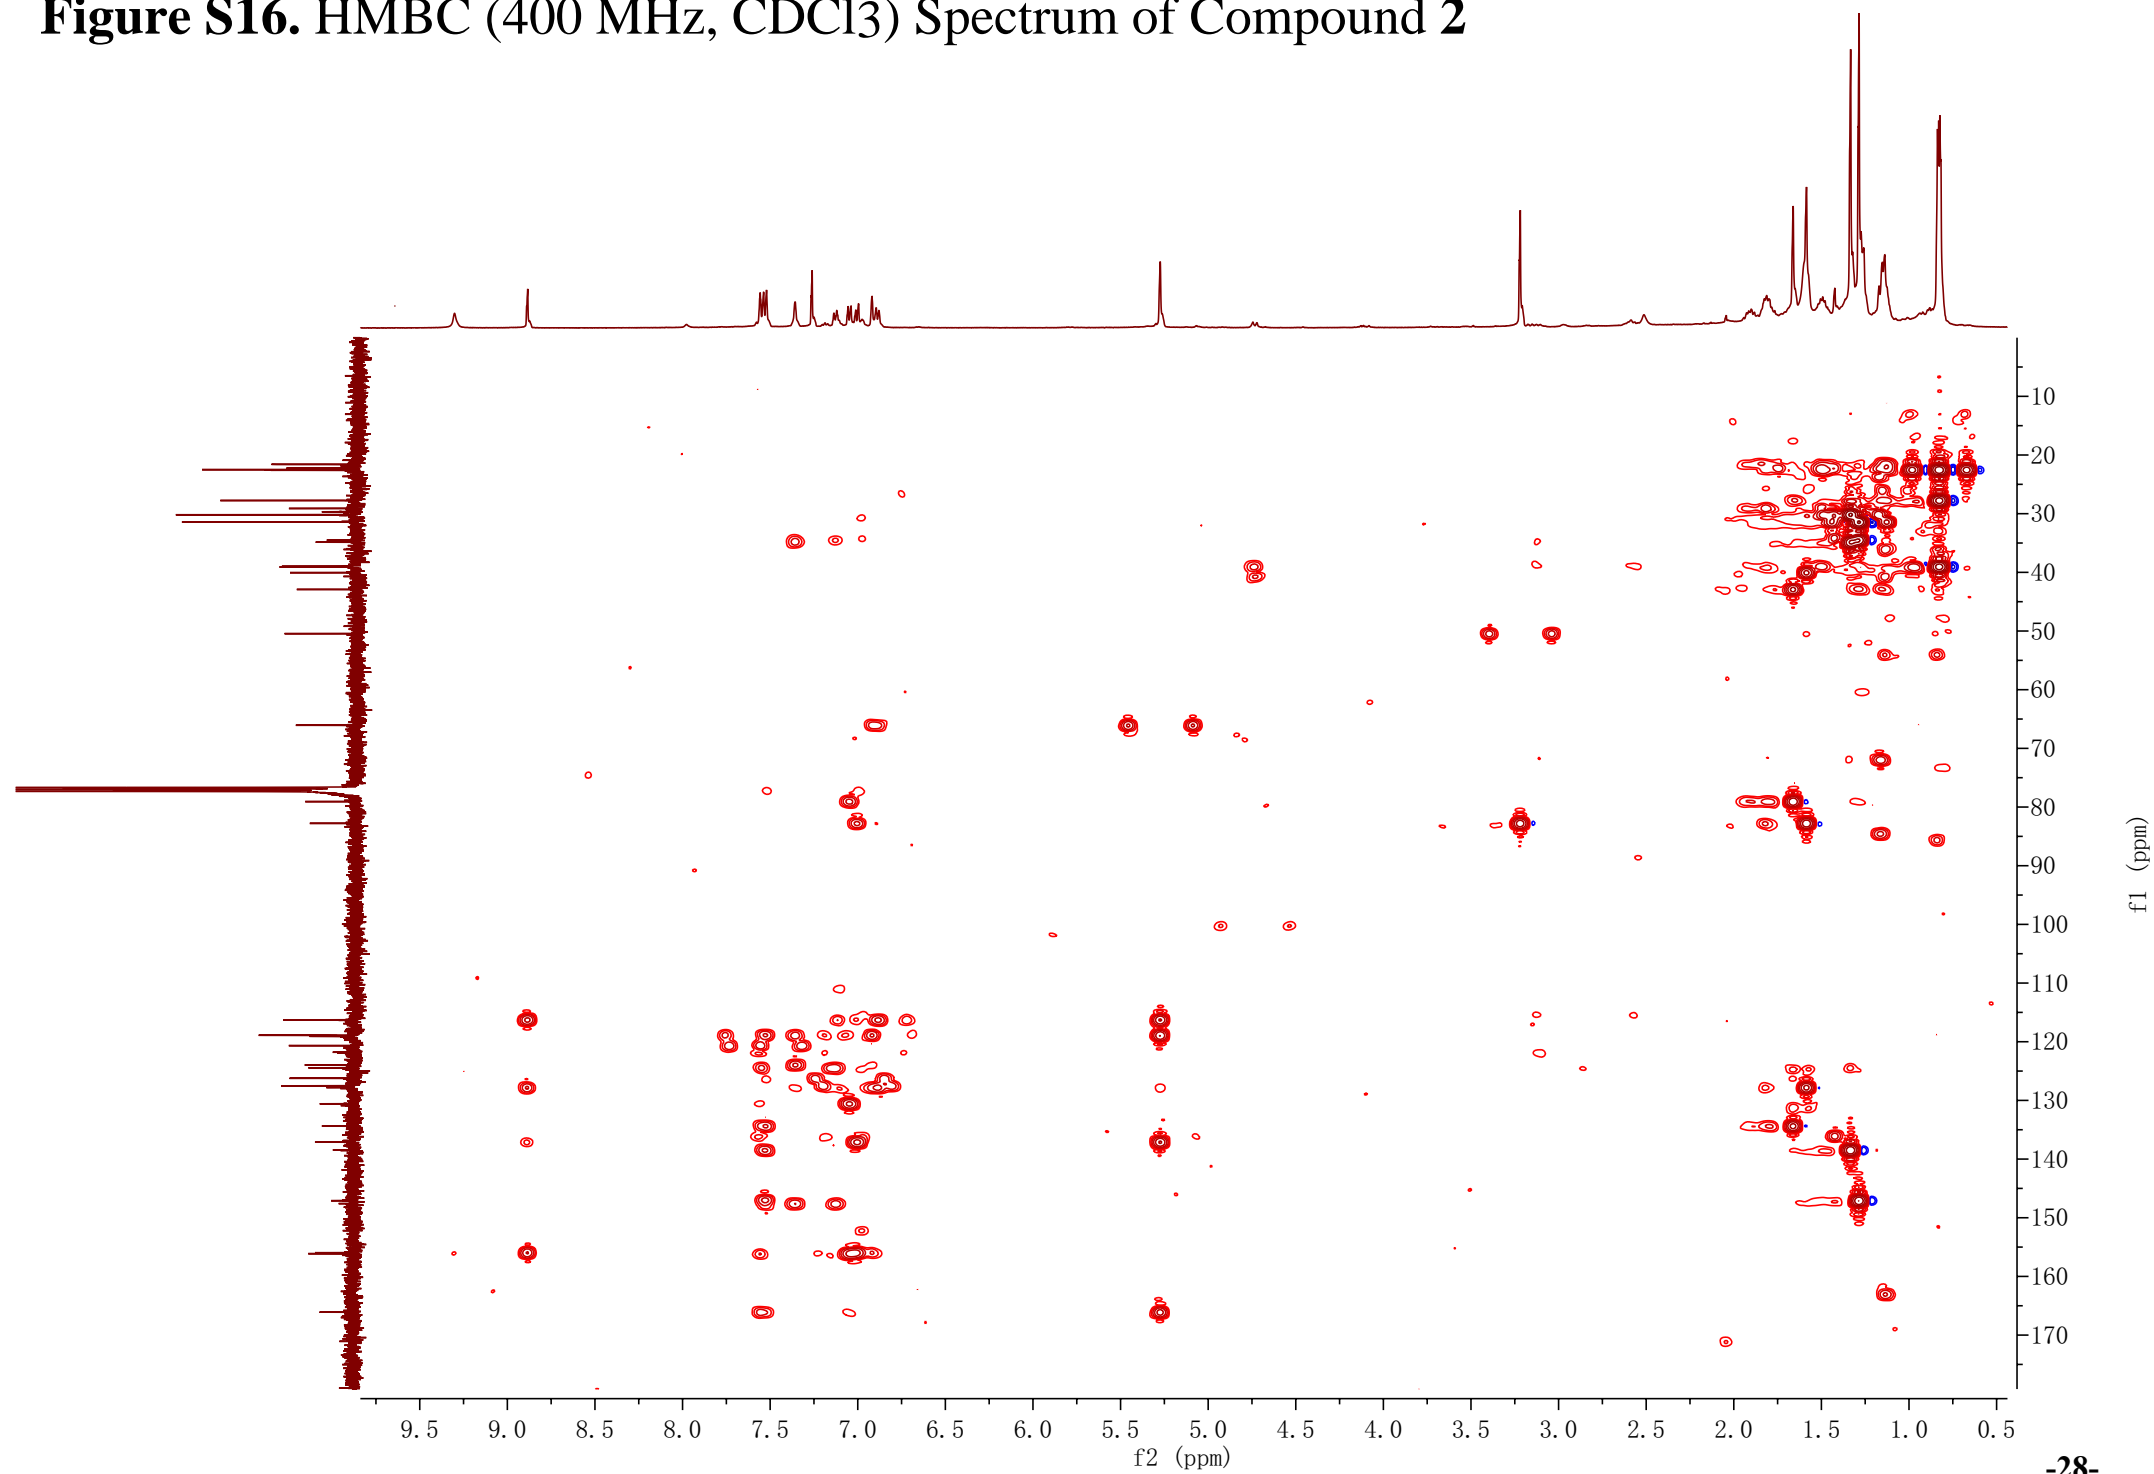



**Figure S17. HR-ESI-MS Spectrum of Compound 2**

| Elmt | Val. | Min | Max | Elmt | Val. | Min | Max | Use Adduct |
|------|------|-----|-----|------|------|-----|-----|------------|
| H    | 1    | 46  | 46  | F    | 1    | 0   | 1   | H          |
| C    | 4    | 30  | 31  | S    | 2    | 0   | 0   | Na         |
| N    | 3    | 0   | 2   |      |      |     |     | K          |
| O    | 2    | 3   | 7   |      |      |     |     | NH4        |

Error Margin (ppm): 20  
 HC Ratio: 0.0 - 100.0  
 Max Isotopes: all  
 MSn Iso RI (%): 75.00

DBE Range: -100.0 - 200.0  
 Apply N Rule: no  
 Isotope RI (%): 1.00  
 MSn Logic Mode: OR

Electron Ions: both  
 Use MSn Info: no  
 Isotope Res: 10000  
 Max Results: 1000

Event#: 1 MS(E+) Ret. Time : 1.463 Scan# : 219

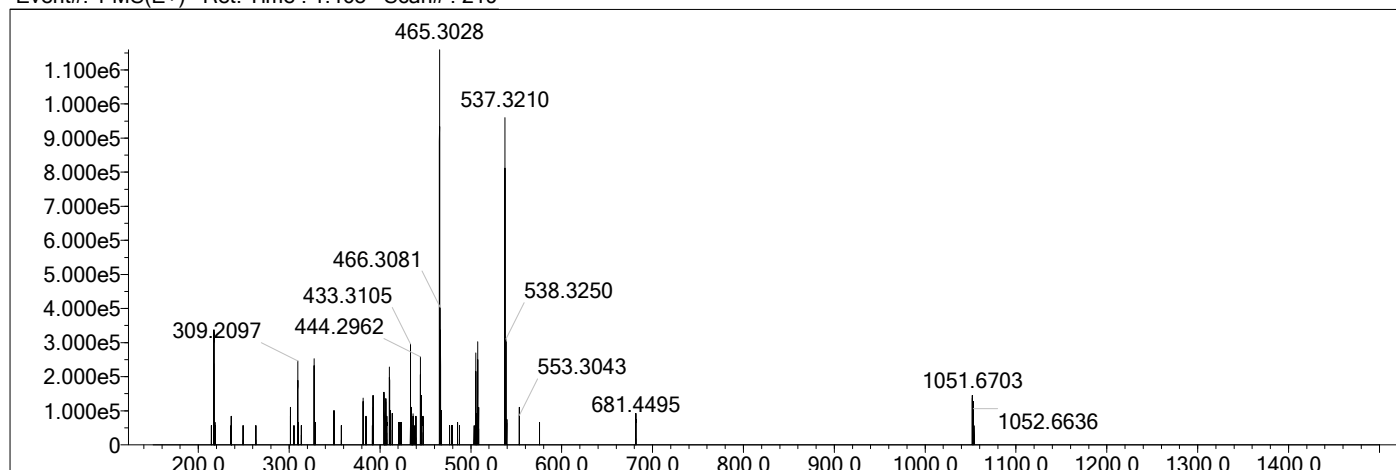

Measured region for 537.3210 m/z

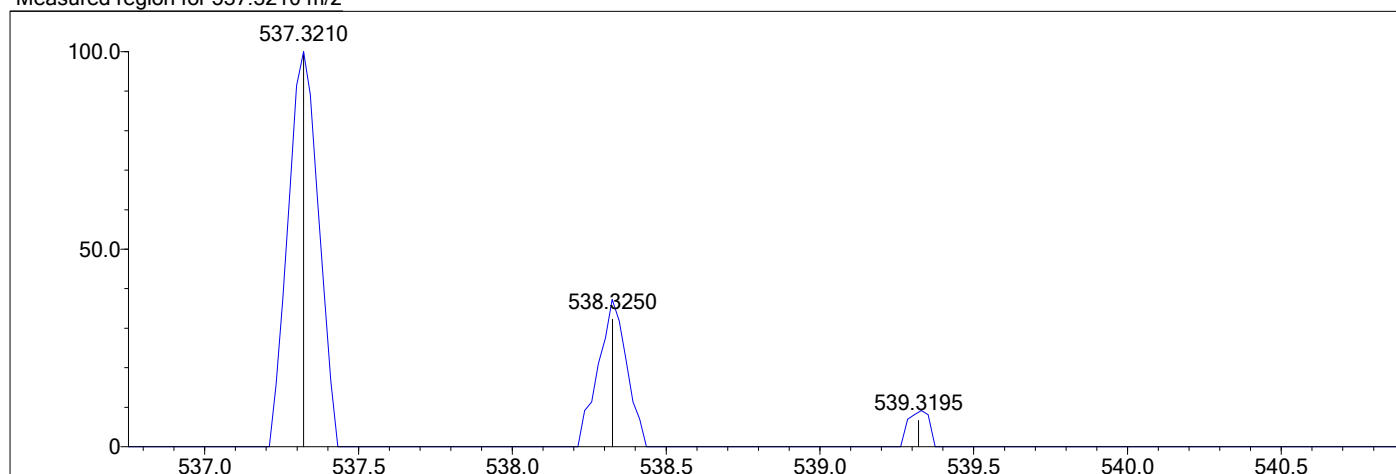

C31 H46 O6 [M+Na]+ : Predicted region for 537.3187 m/z

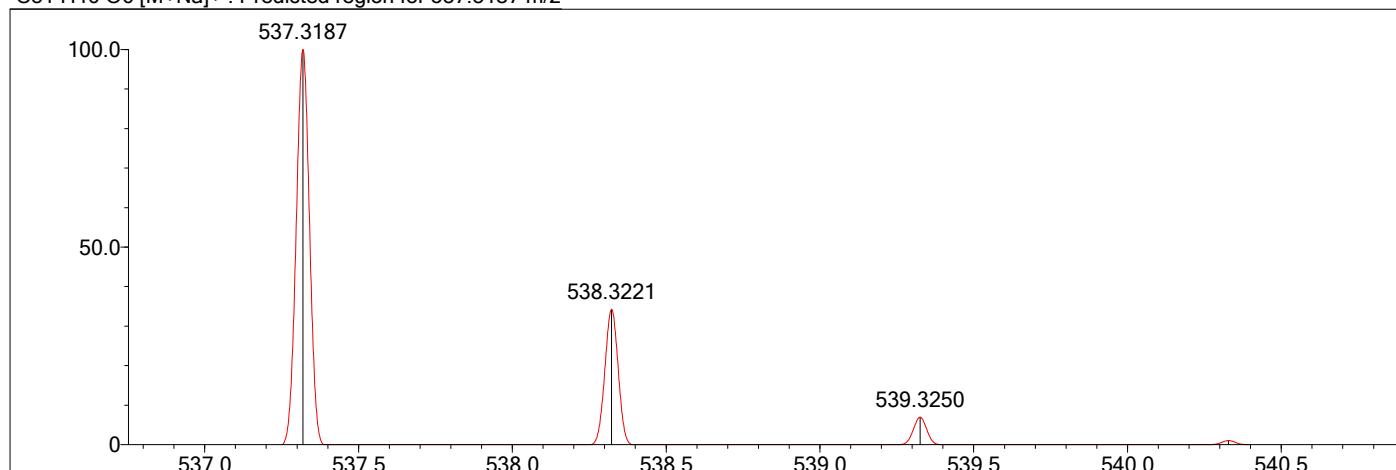

| Rank | Score | Formula (M) | Ion     | Meas. m/z | Pred. m/z | Df. (mDa) | Df. (ppm) | Iso   | DBE |
|------|-------|-------------|---------|-----------|-----------|-----------|-----------|-------|-----|
| 1    | 79.09 | C31 H46 O6  | [M+Na]+ | 537.3210  | 537.3187  | 2.3       | 4.28      | 86.16 | 9.0 |

**Figure S18.**  $^1\text{H}$  NMR (500 MHz,  $\text{CDCl}_3$ ) Spectrum of Compound **3**

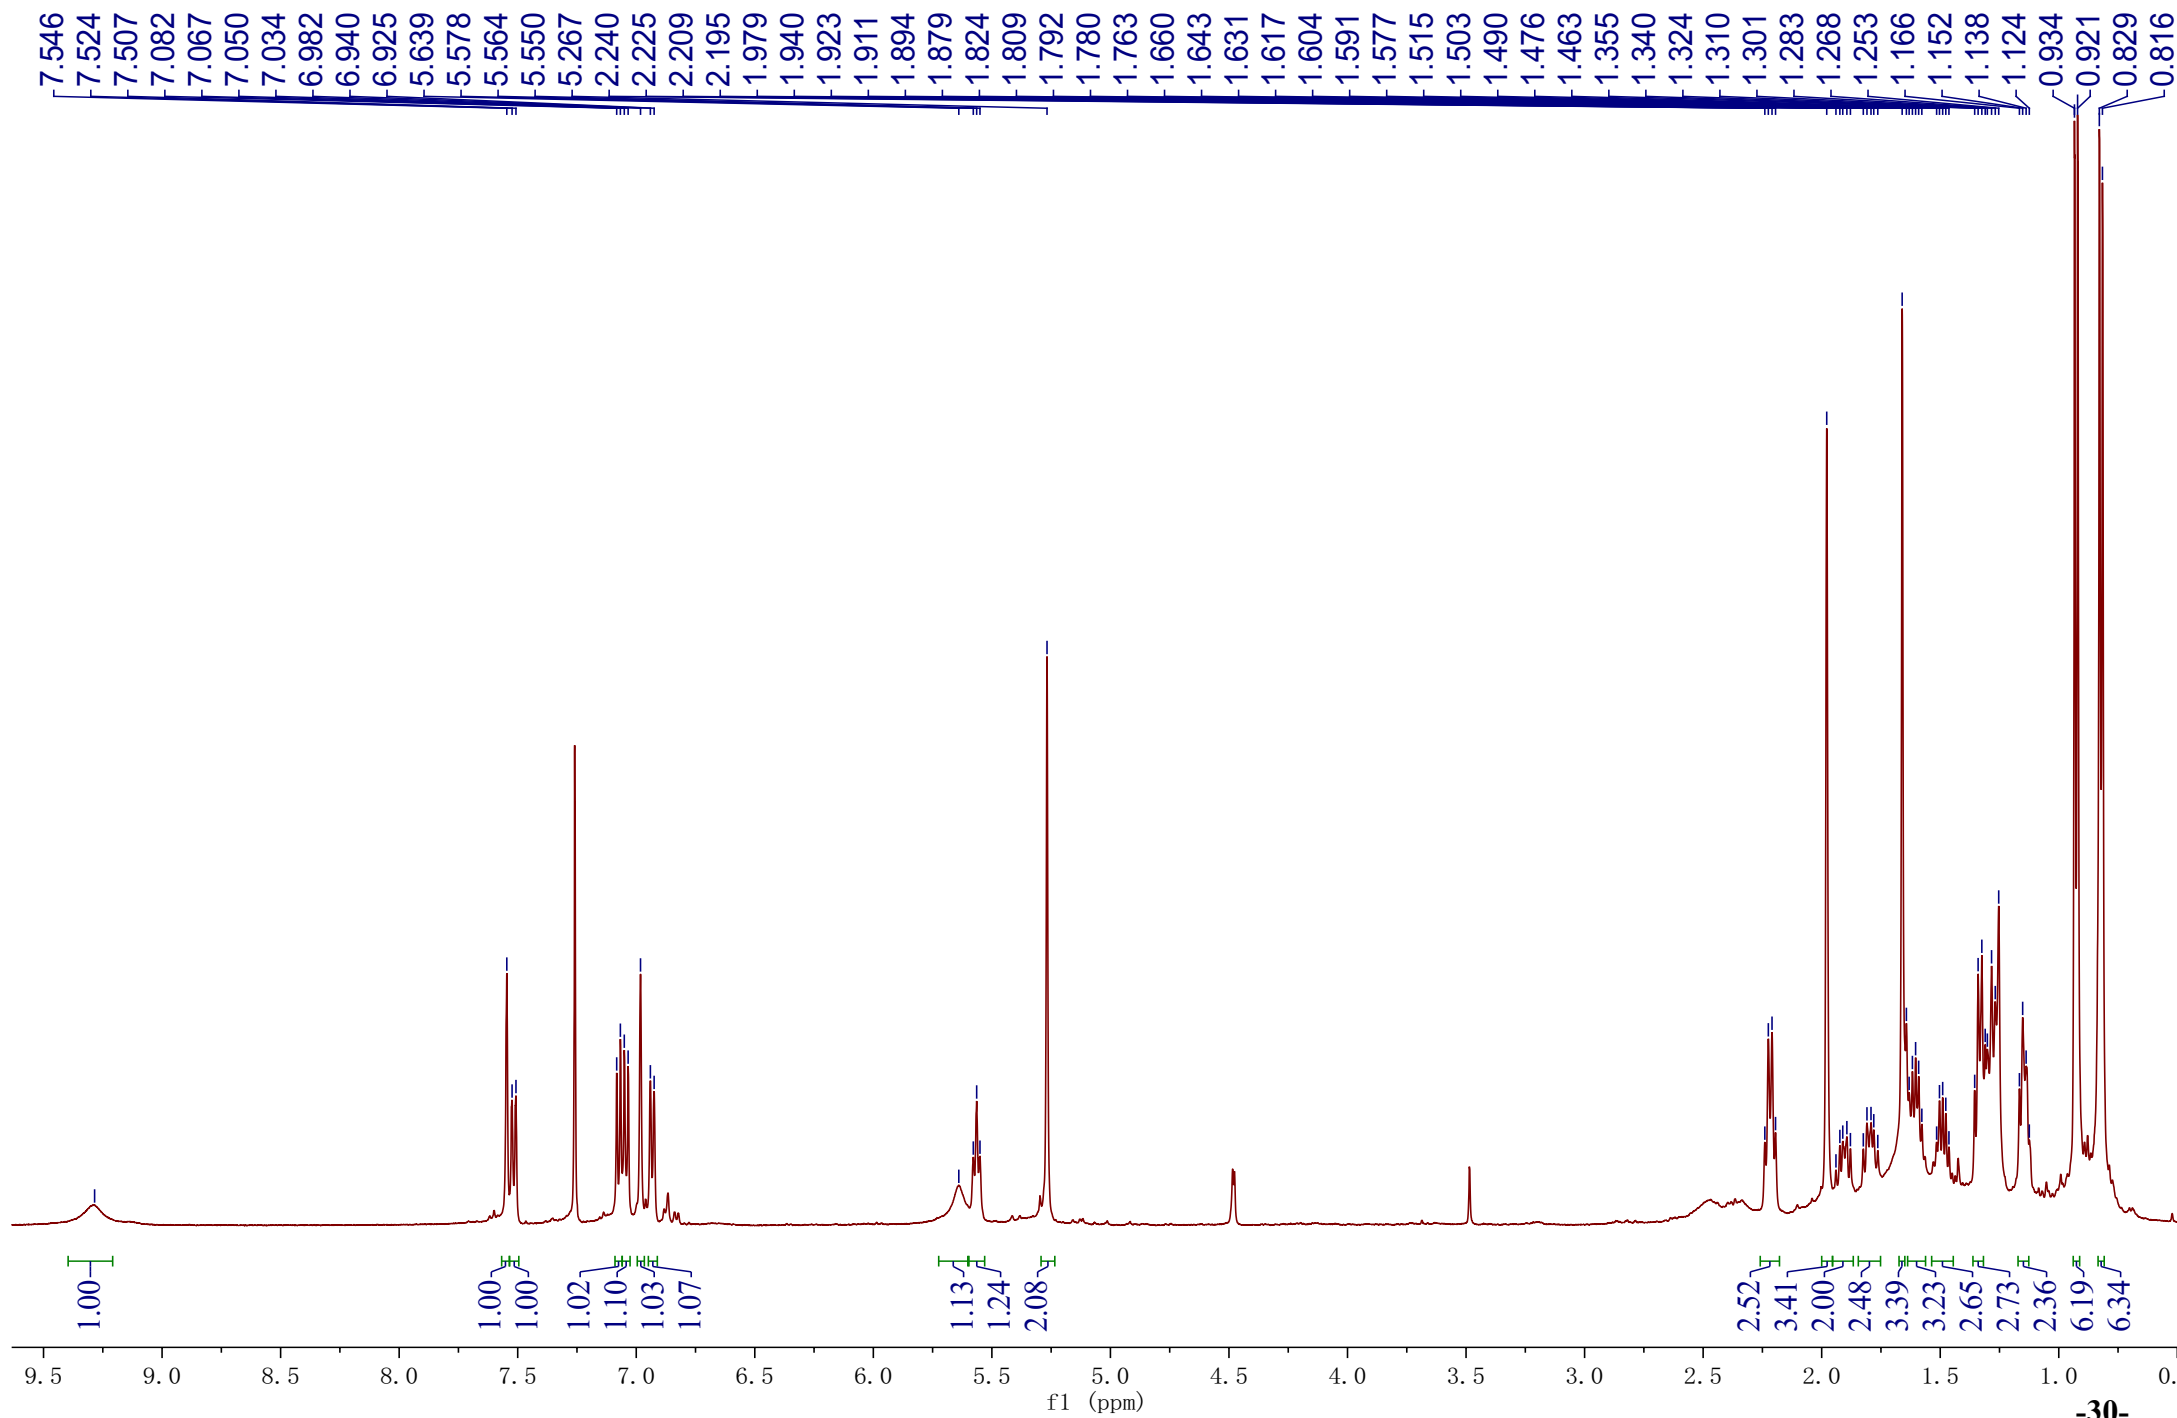

**Figure S19.**  $^{13}\text{C}$  NMR (125 MHz,  $\text{CDCl}_3$ ) Spectrum of Compound **3**

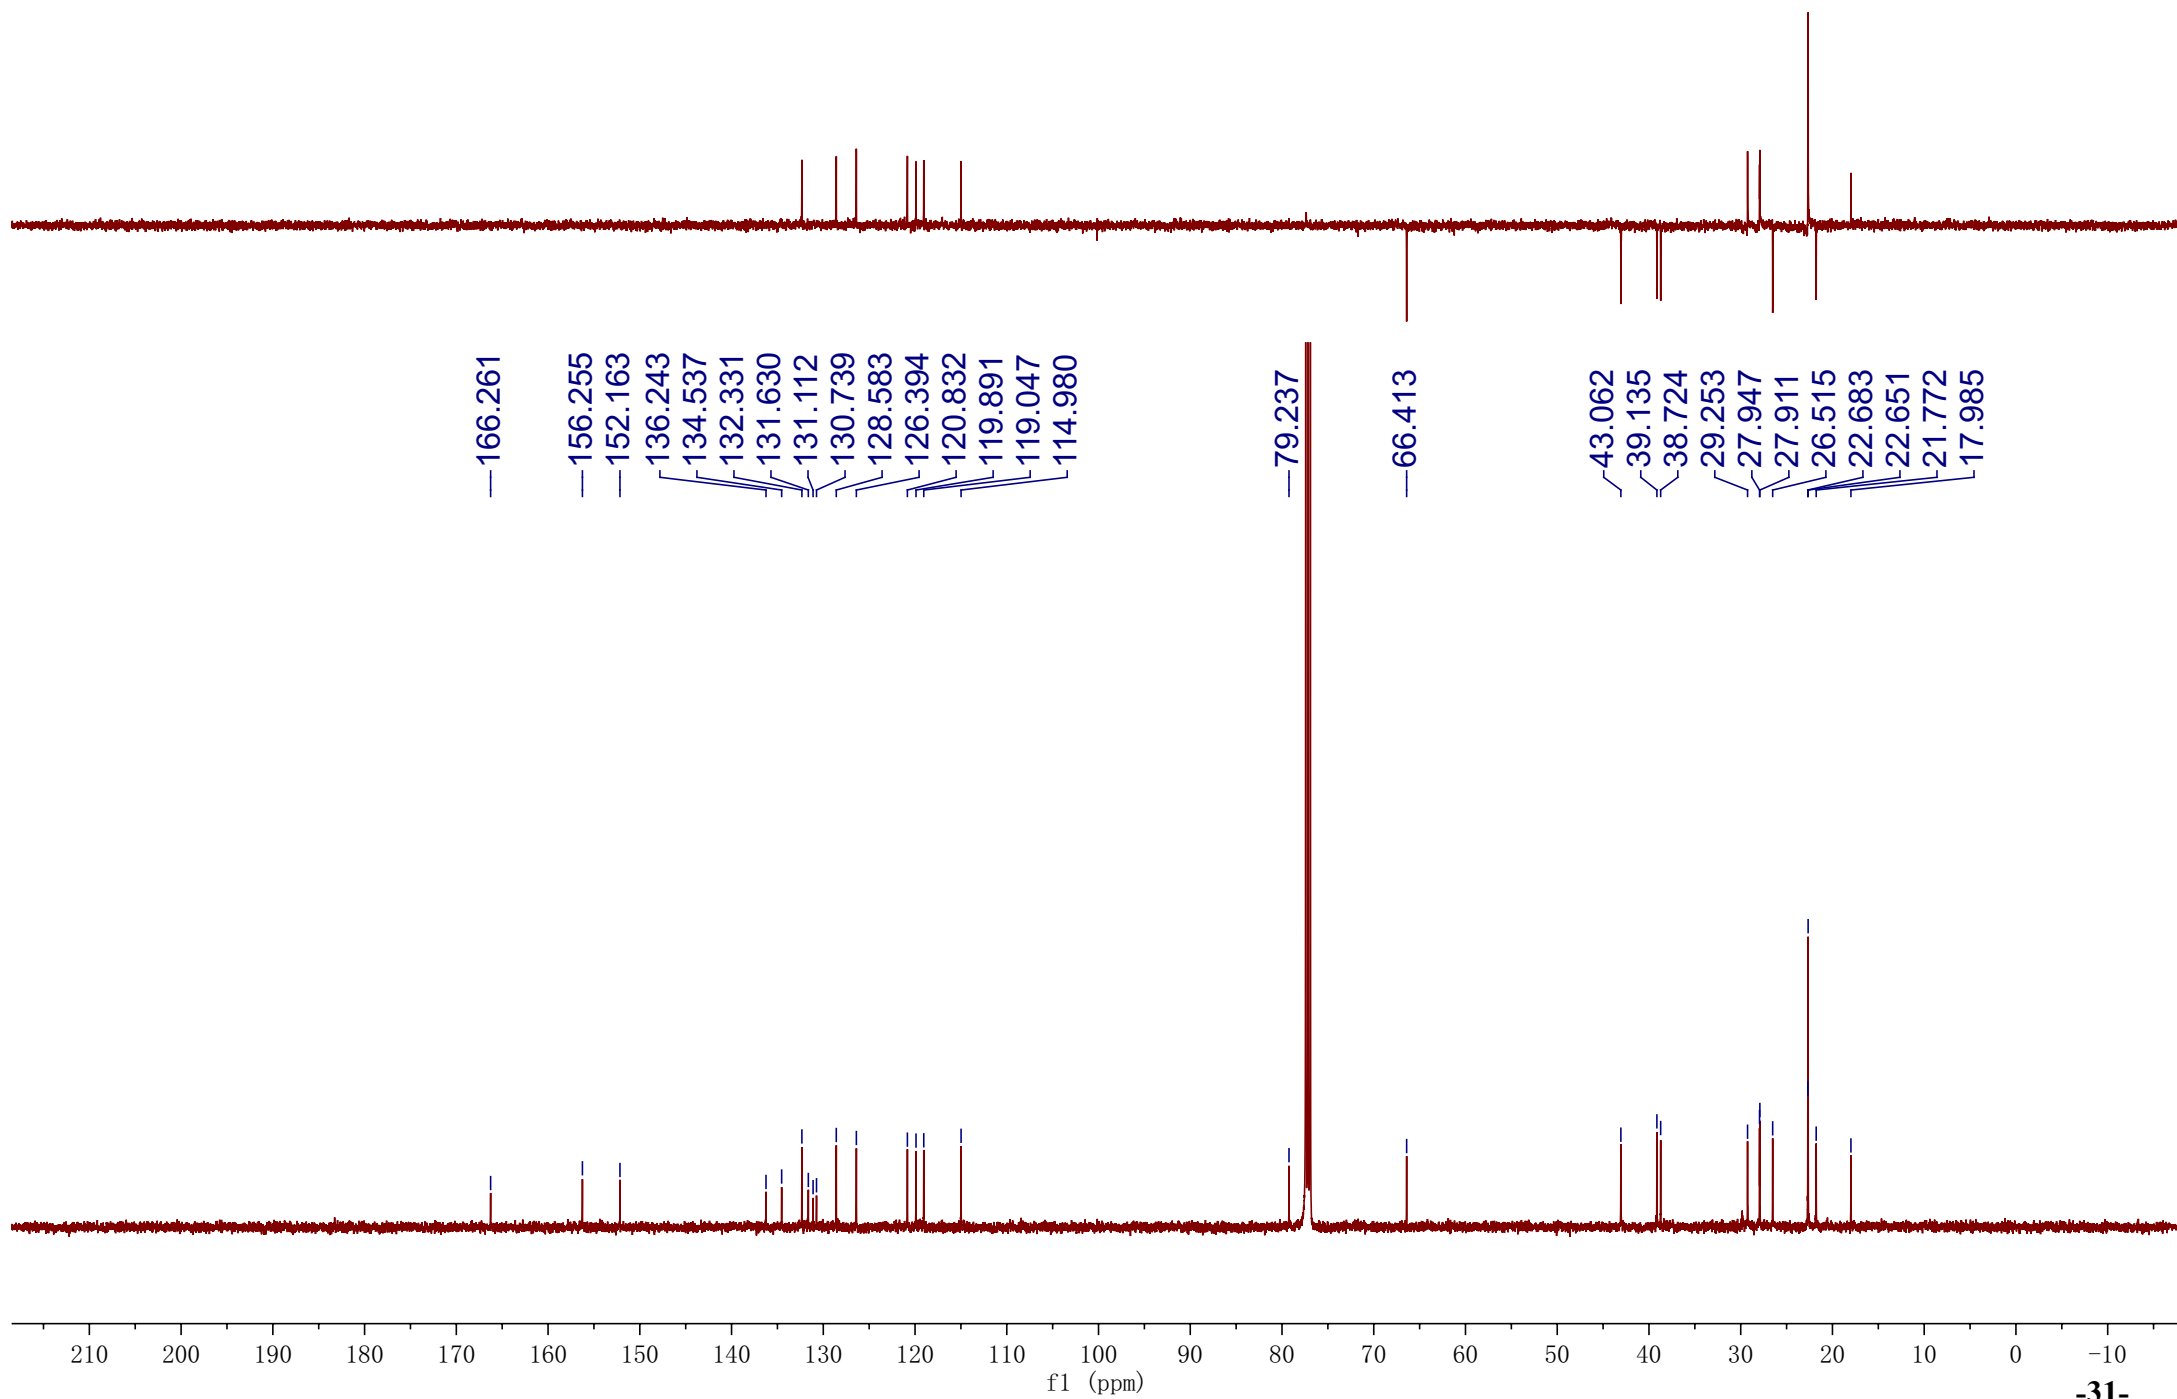

**Figure S20.** HSQC (500 MHz, CDCl<sub>3</sub>) Spectrum of Compound **3**

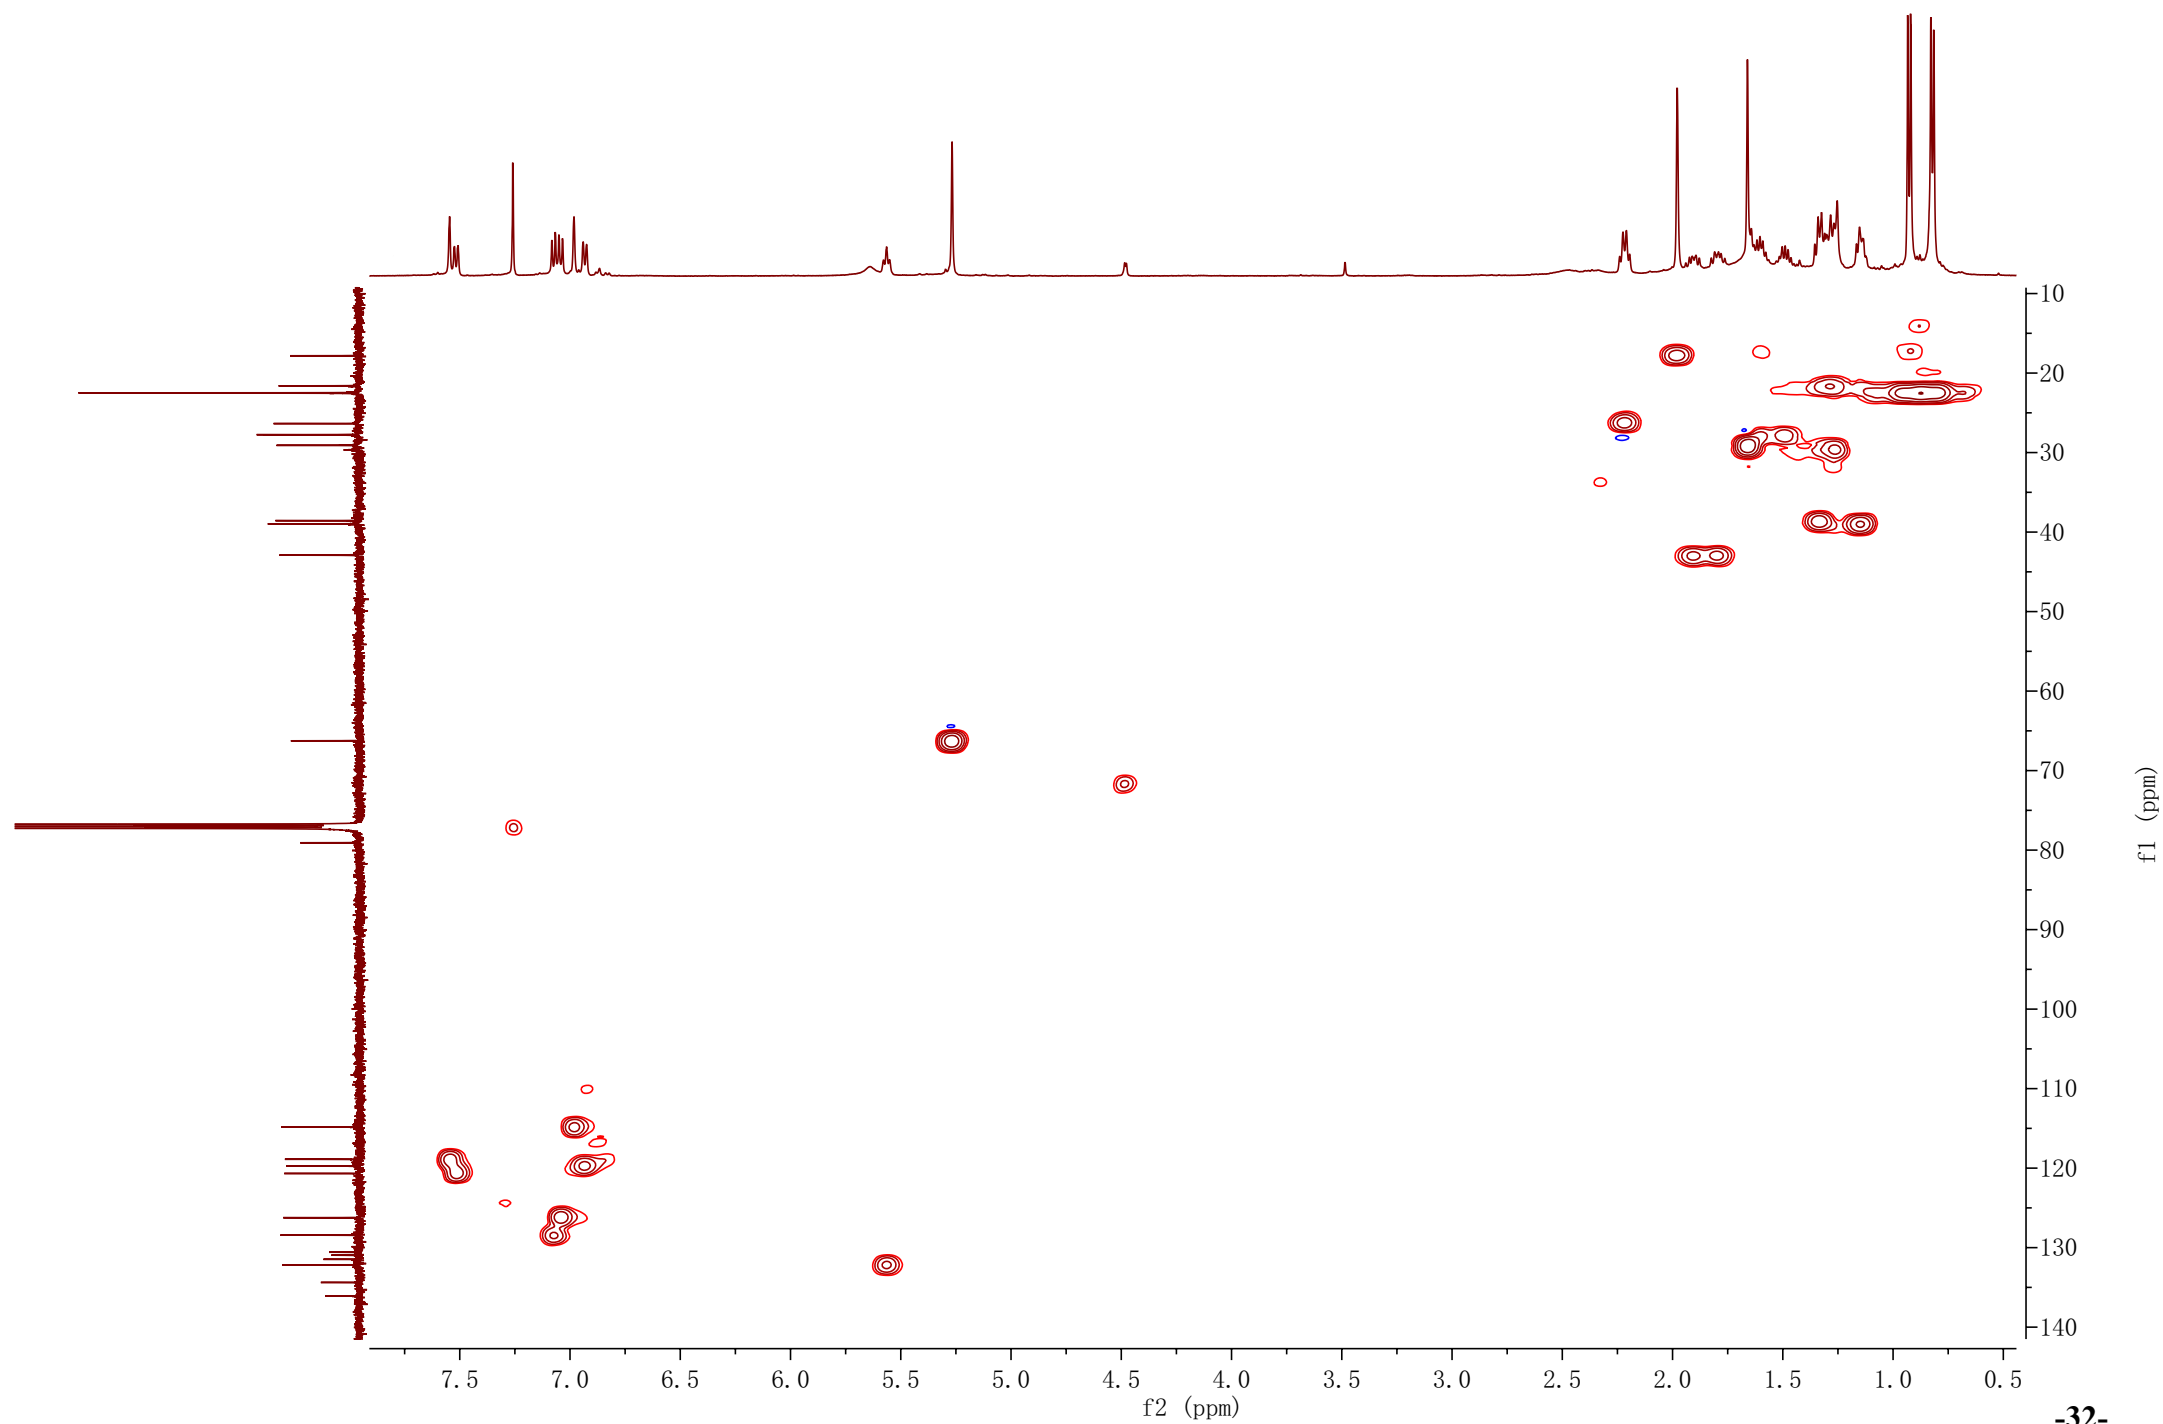

**Figure S21.**  $^1\text{H}$ - $^1\text{H}$  COSY (500 MHz,  $\text{CDCl}_3$ ) Spectrum of Compound **3**

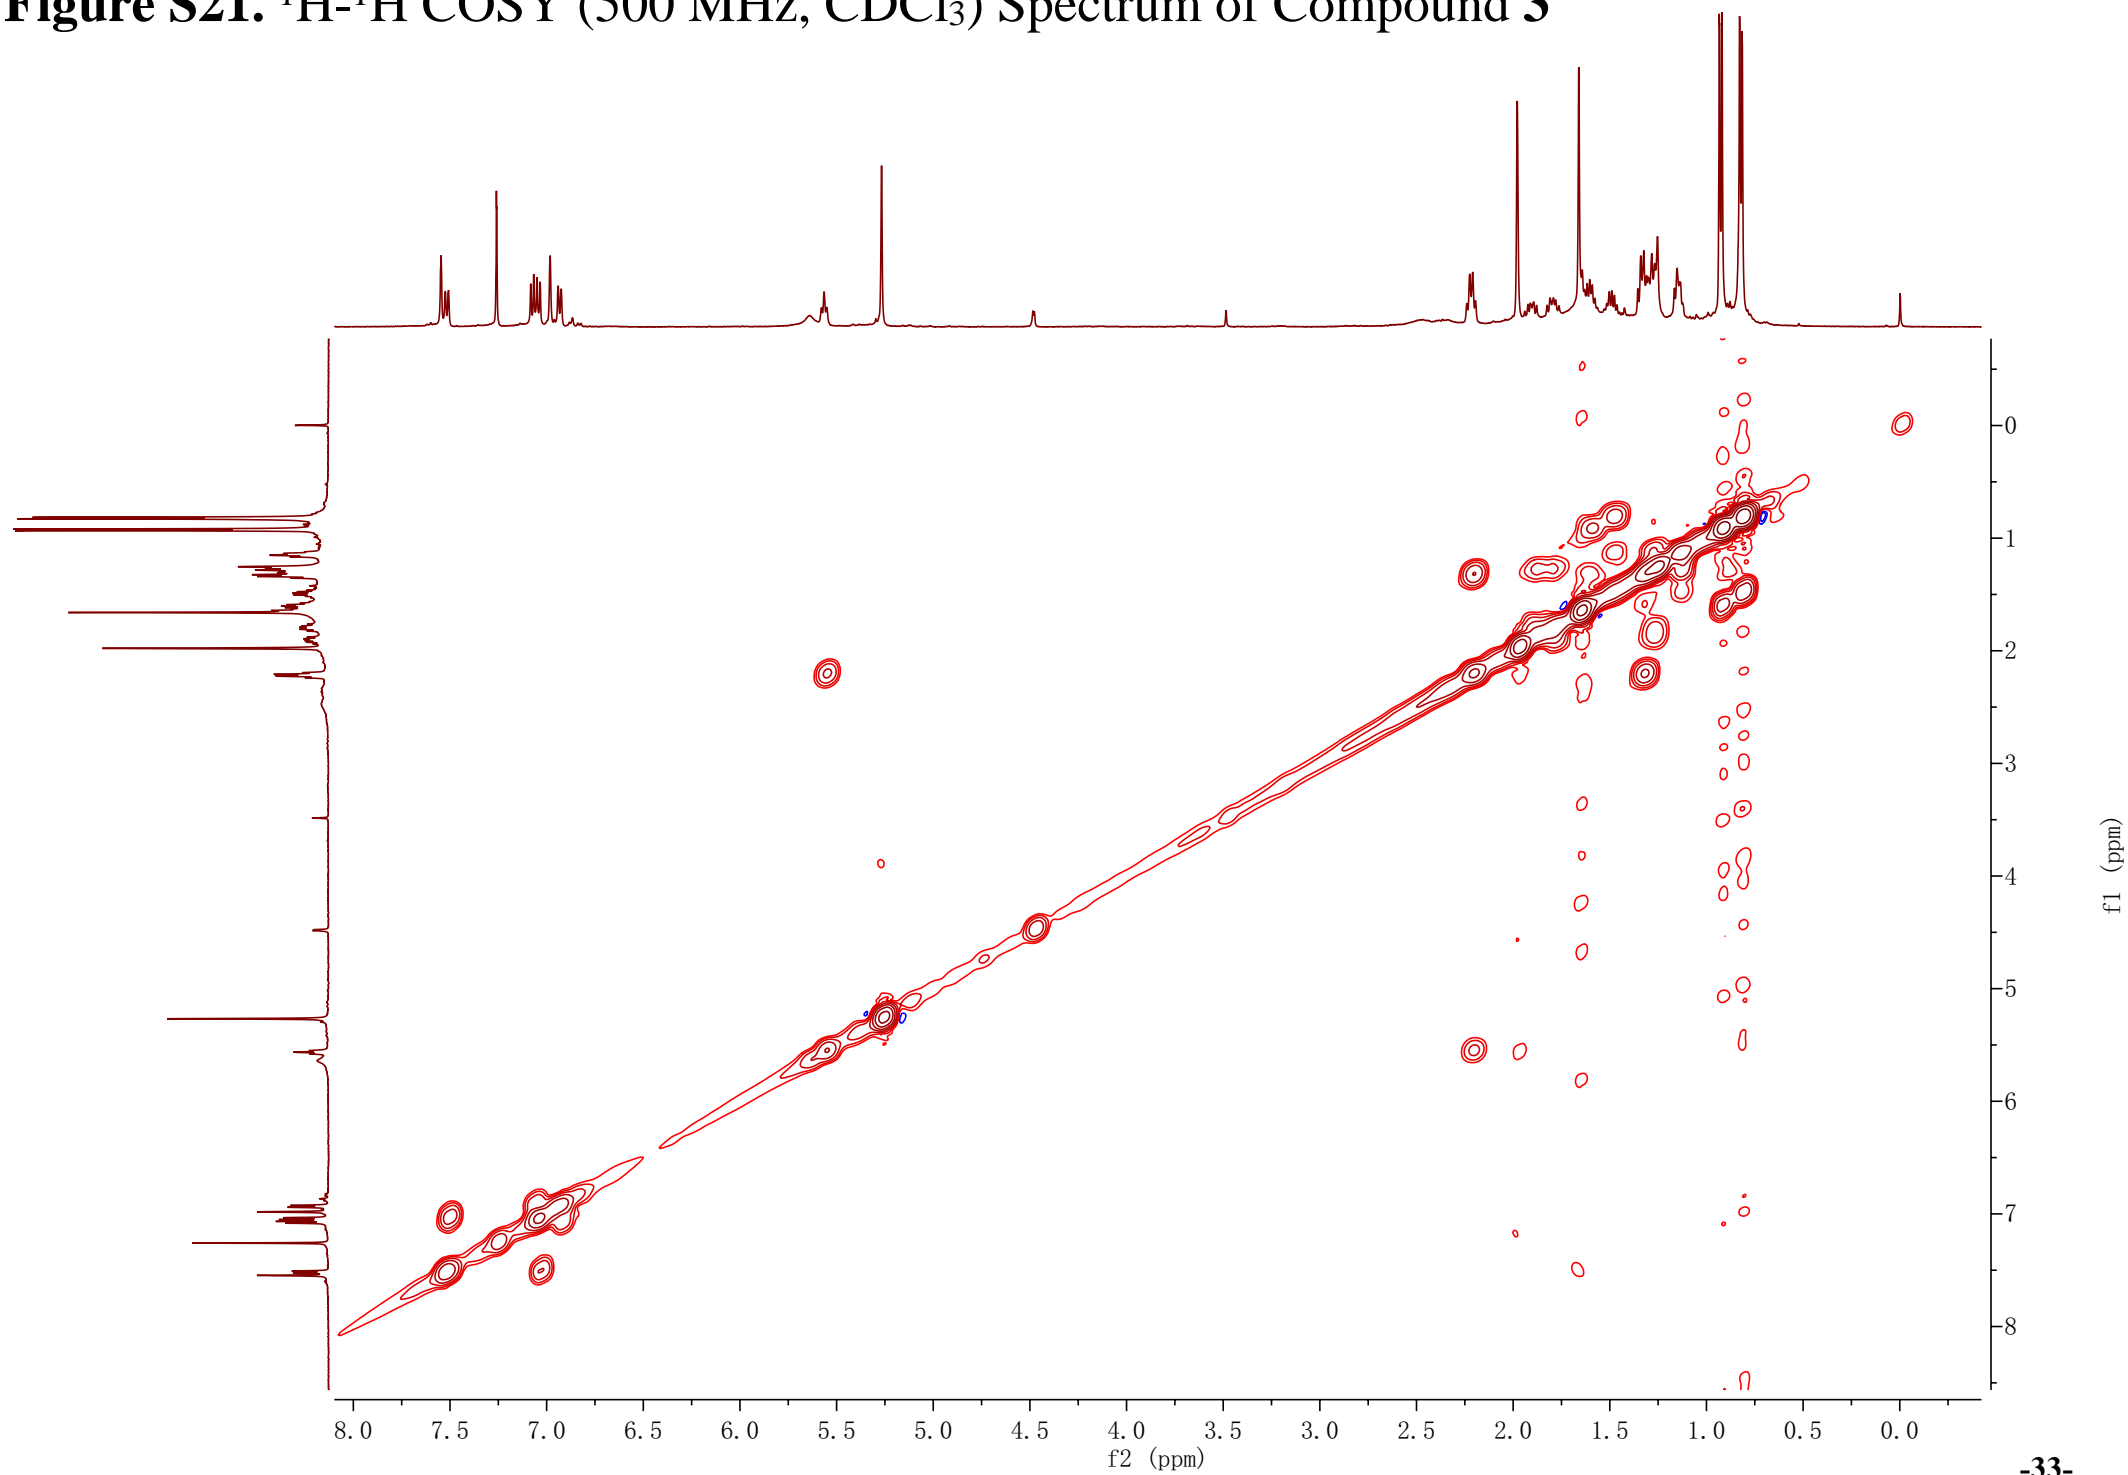

**Figure S22.** HMBC (500 MHz, CDCl<sub>3</sub>) Spectrum of Compound **3**

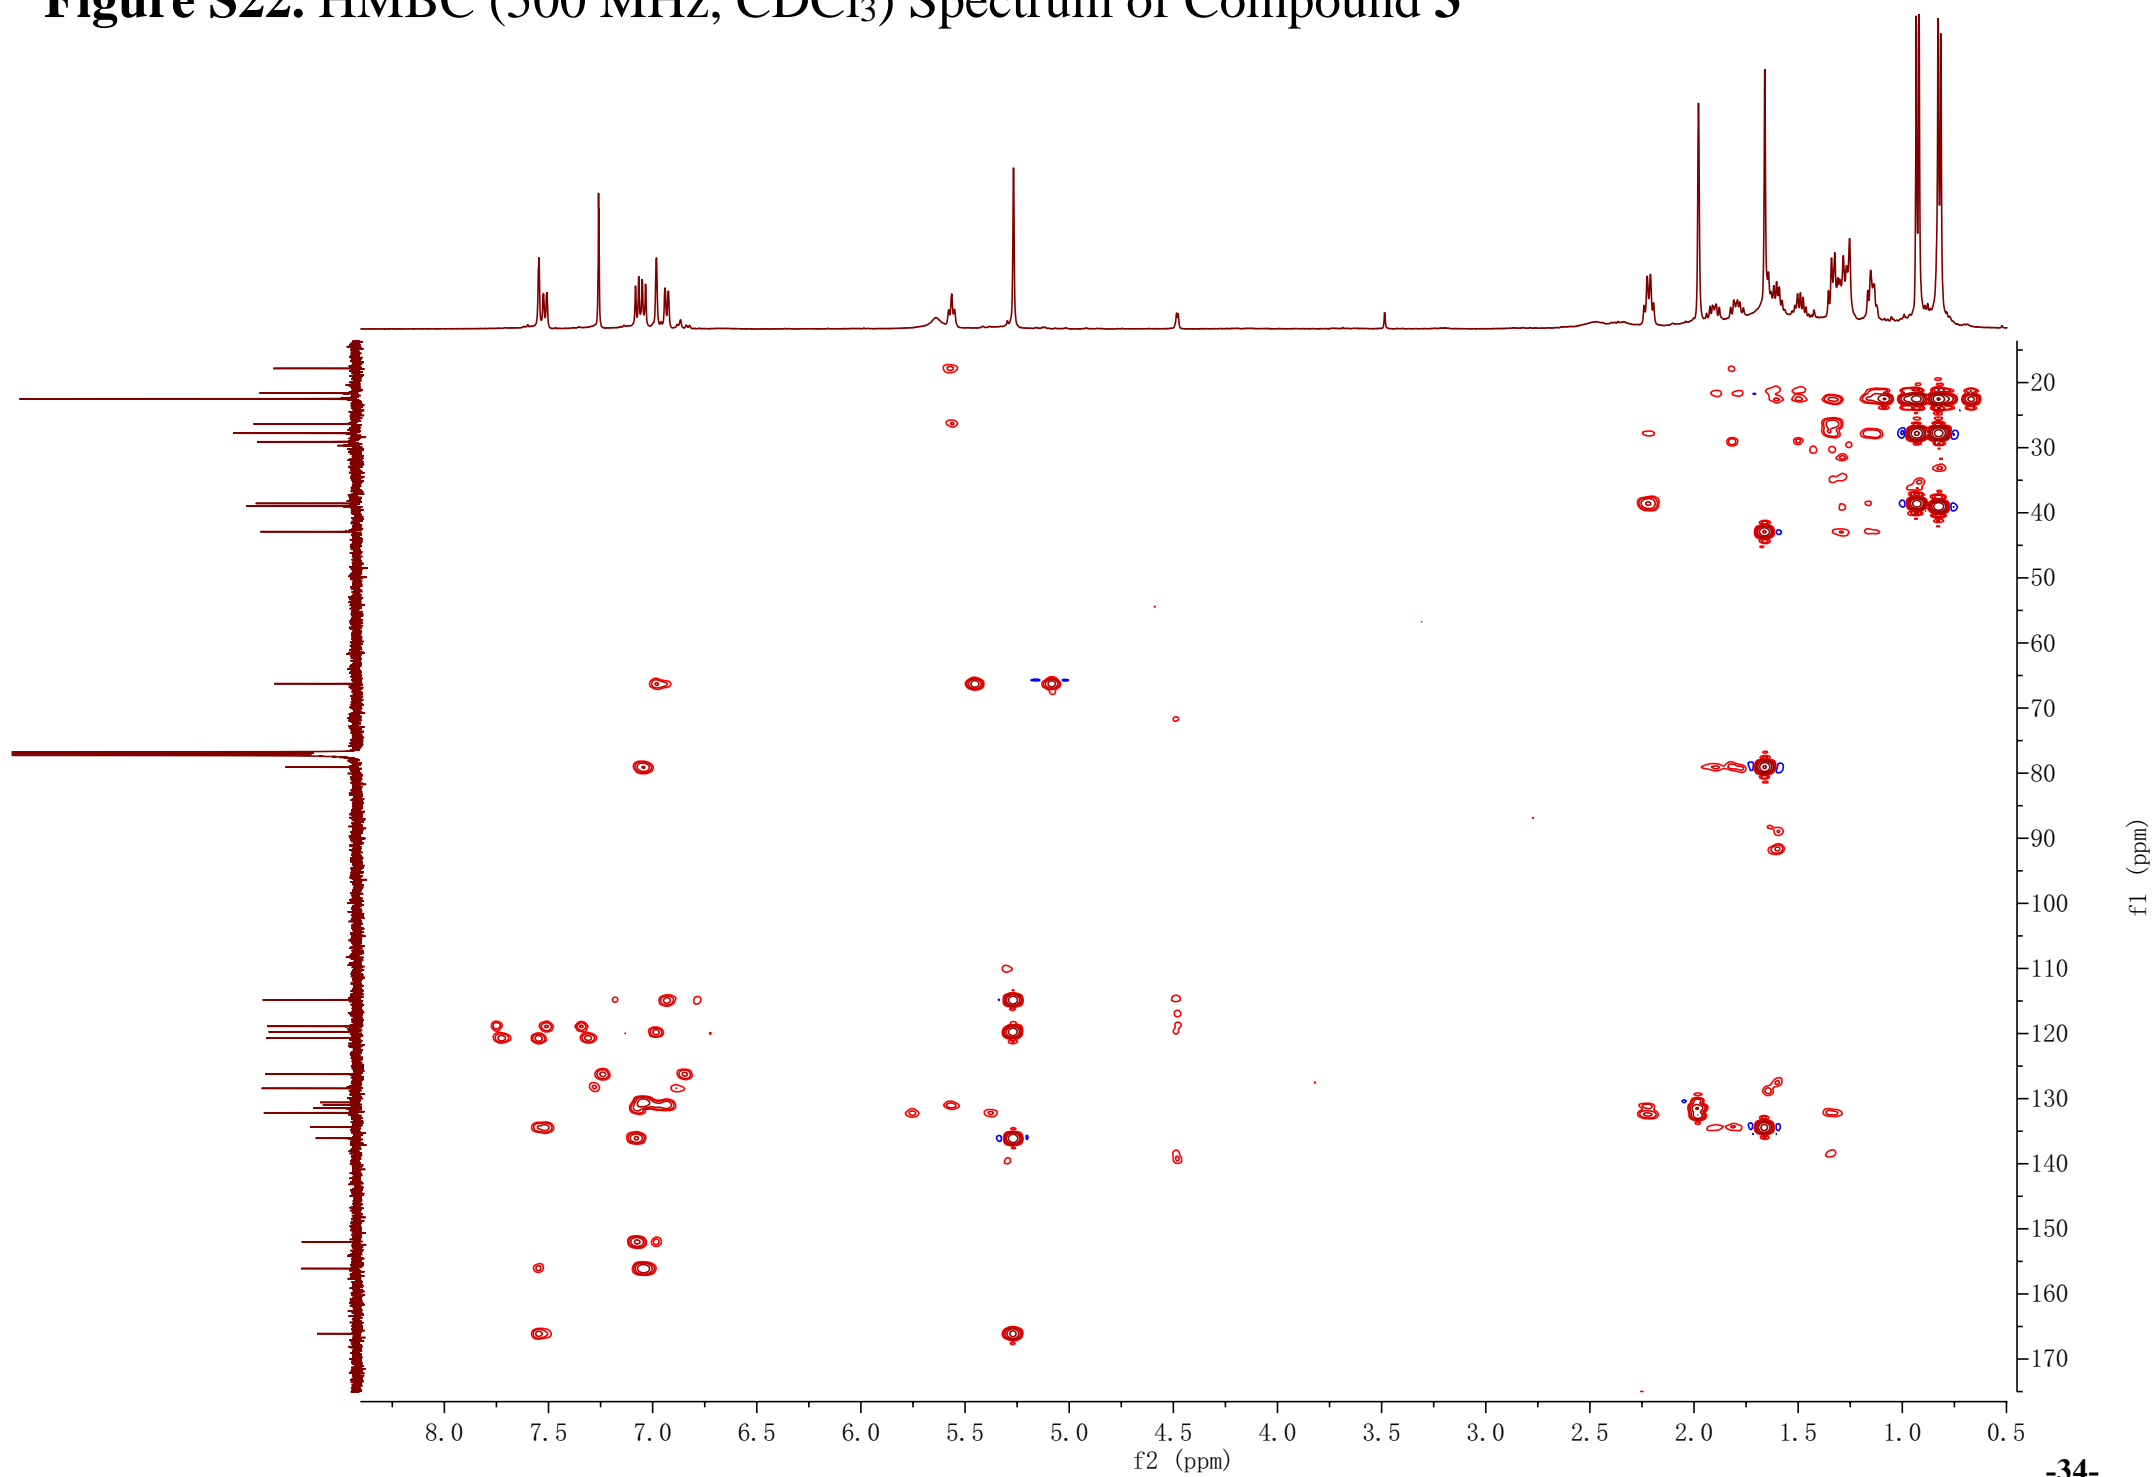

Figure S23. HR-ESI-MS Spectrum of Compound 3

| Elmt | Val. | Min | Max | Use Adduct |
|------|------|-----|-----|------|------|-----|-----|------|------|-----|-----|------|------|-----|-----|------------|
| H    | 1    | 42  | 42  | O    | 2    | 5   | 5   | S    | 2    | 0   | 0   | Br   | 1    | 0   | 0   | H          |
| B    | 3    | 0   | 0   | F    | 1    | 0   | 0   | Cl   | 1    | 0   | 0   | I    | 3    | 0   | 0   | Na         |
| C    | 4    | 30  | 30  | Si   | 4    | 0   | 0   | As   | 3    | 0   | 0   | Au   | 1    | 0   | 0   | K          |
| N    | 3    | 0   | 0   | P    | 3    | 0   | 0   | Se   | 2    | 0   | 0   |      |      |     |     | NH4        |

Error Margin (ppm): 100  
HC Ratio: 0.0 - 100.0  
Max Isotopes: all  
MSn Iso RI (%): 75.00

DBE Range: -100.0 - 200.0  
Apply N Rule: no  
Isotope RI (%): 1.00  
MSn Logic Mode: OR

Electron Ions: both  
Use MSn Info: no  
Isotope Res: 10000  
Max Results: 1000

Event#: 1 MS(E+) Ret. Time : 1.503 Scan# : 225

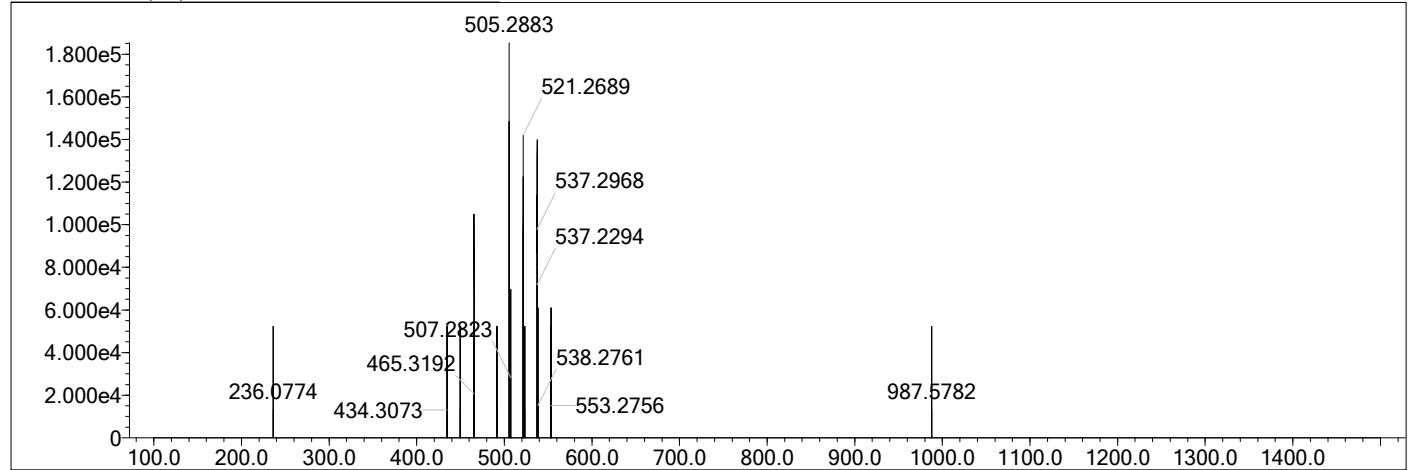

Measured region for 521.2689 m/z

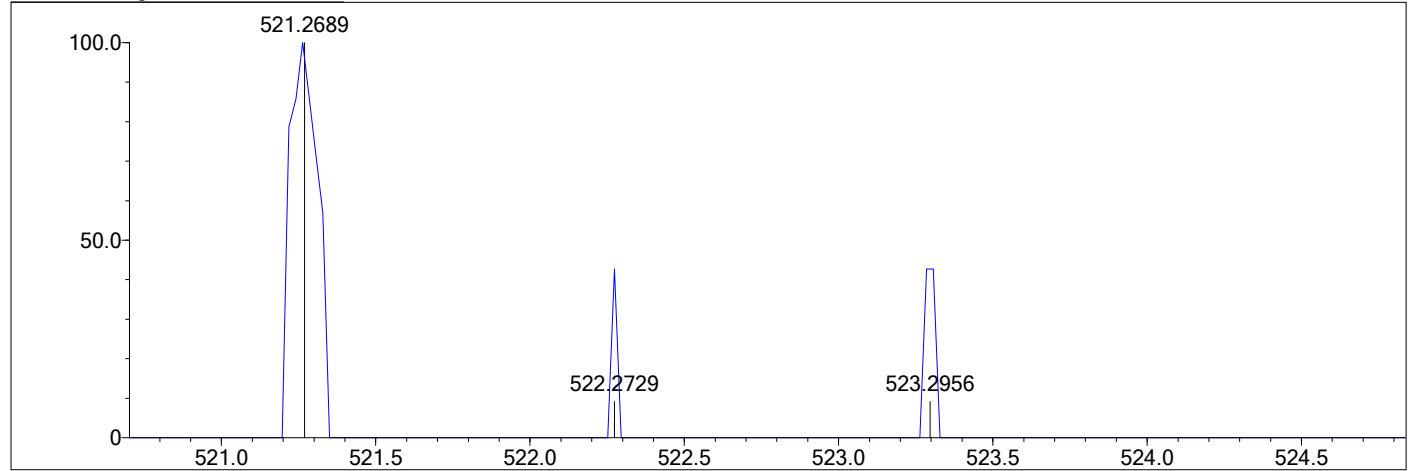

C30 H42 O5 [M+K]+ : Predicted region for 521.2664 m/z

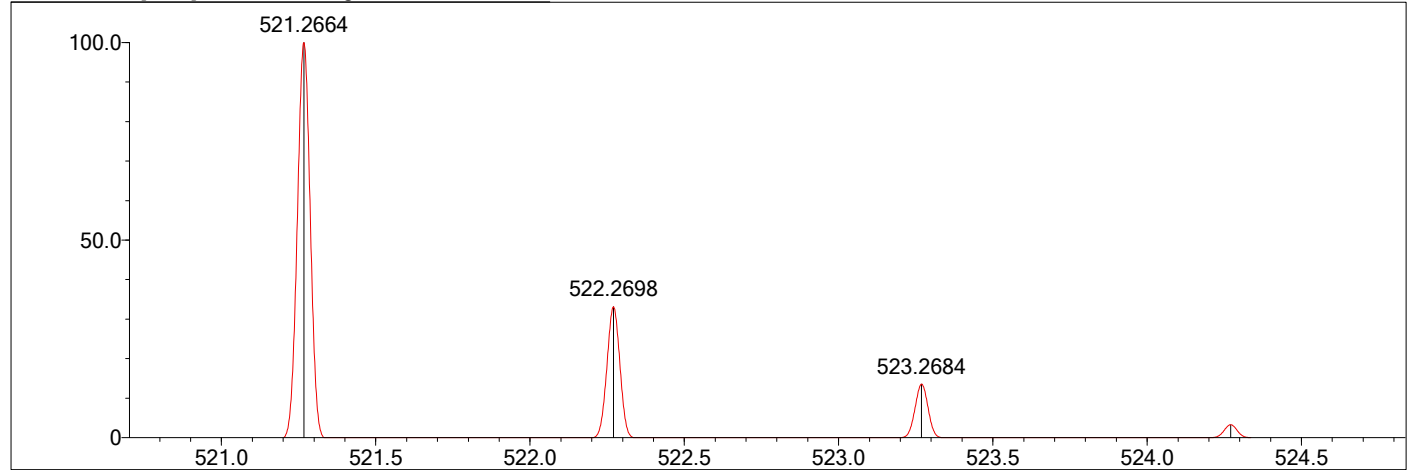

| Rank | Score | Formula (M) | Ion    | Meas. m/z | Pred. m/z | Df. (mDa) | Df. (ppm) | Iso   | DBE  |
|------|-------|-------------|--------|-----------|-----------|-----------|-----------|-------|------|
| 1    | 41.53 | C30 H42 O5  | [M+K]+ | 521.2689  | 521.2664  | 2.5       | 4.80      | 45.89 | 10.0 |

**Figure S24.**  $^1\text{H}$  NMR (400 MHz,  $\text{CDCl}_3$ ) Spectrum of Compound **4**

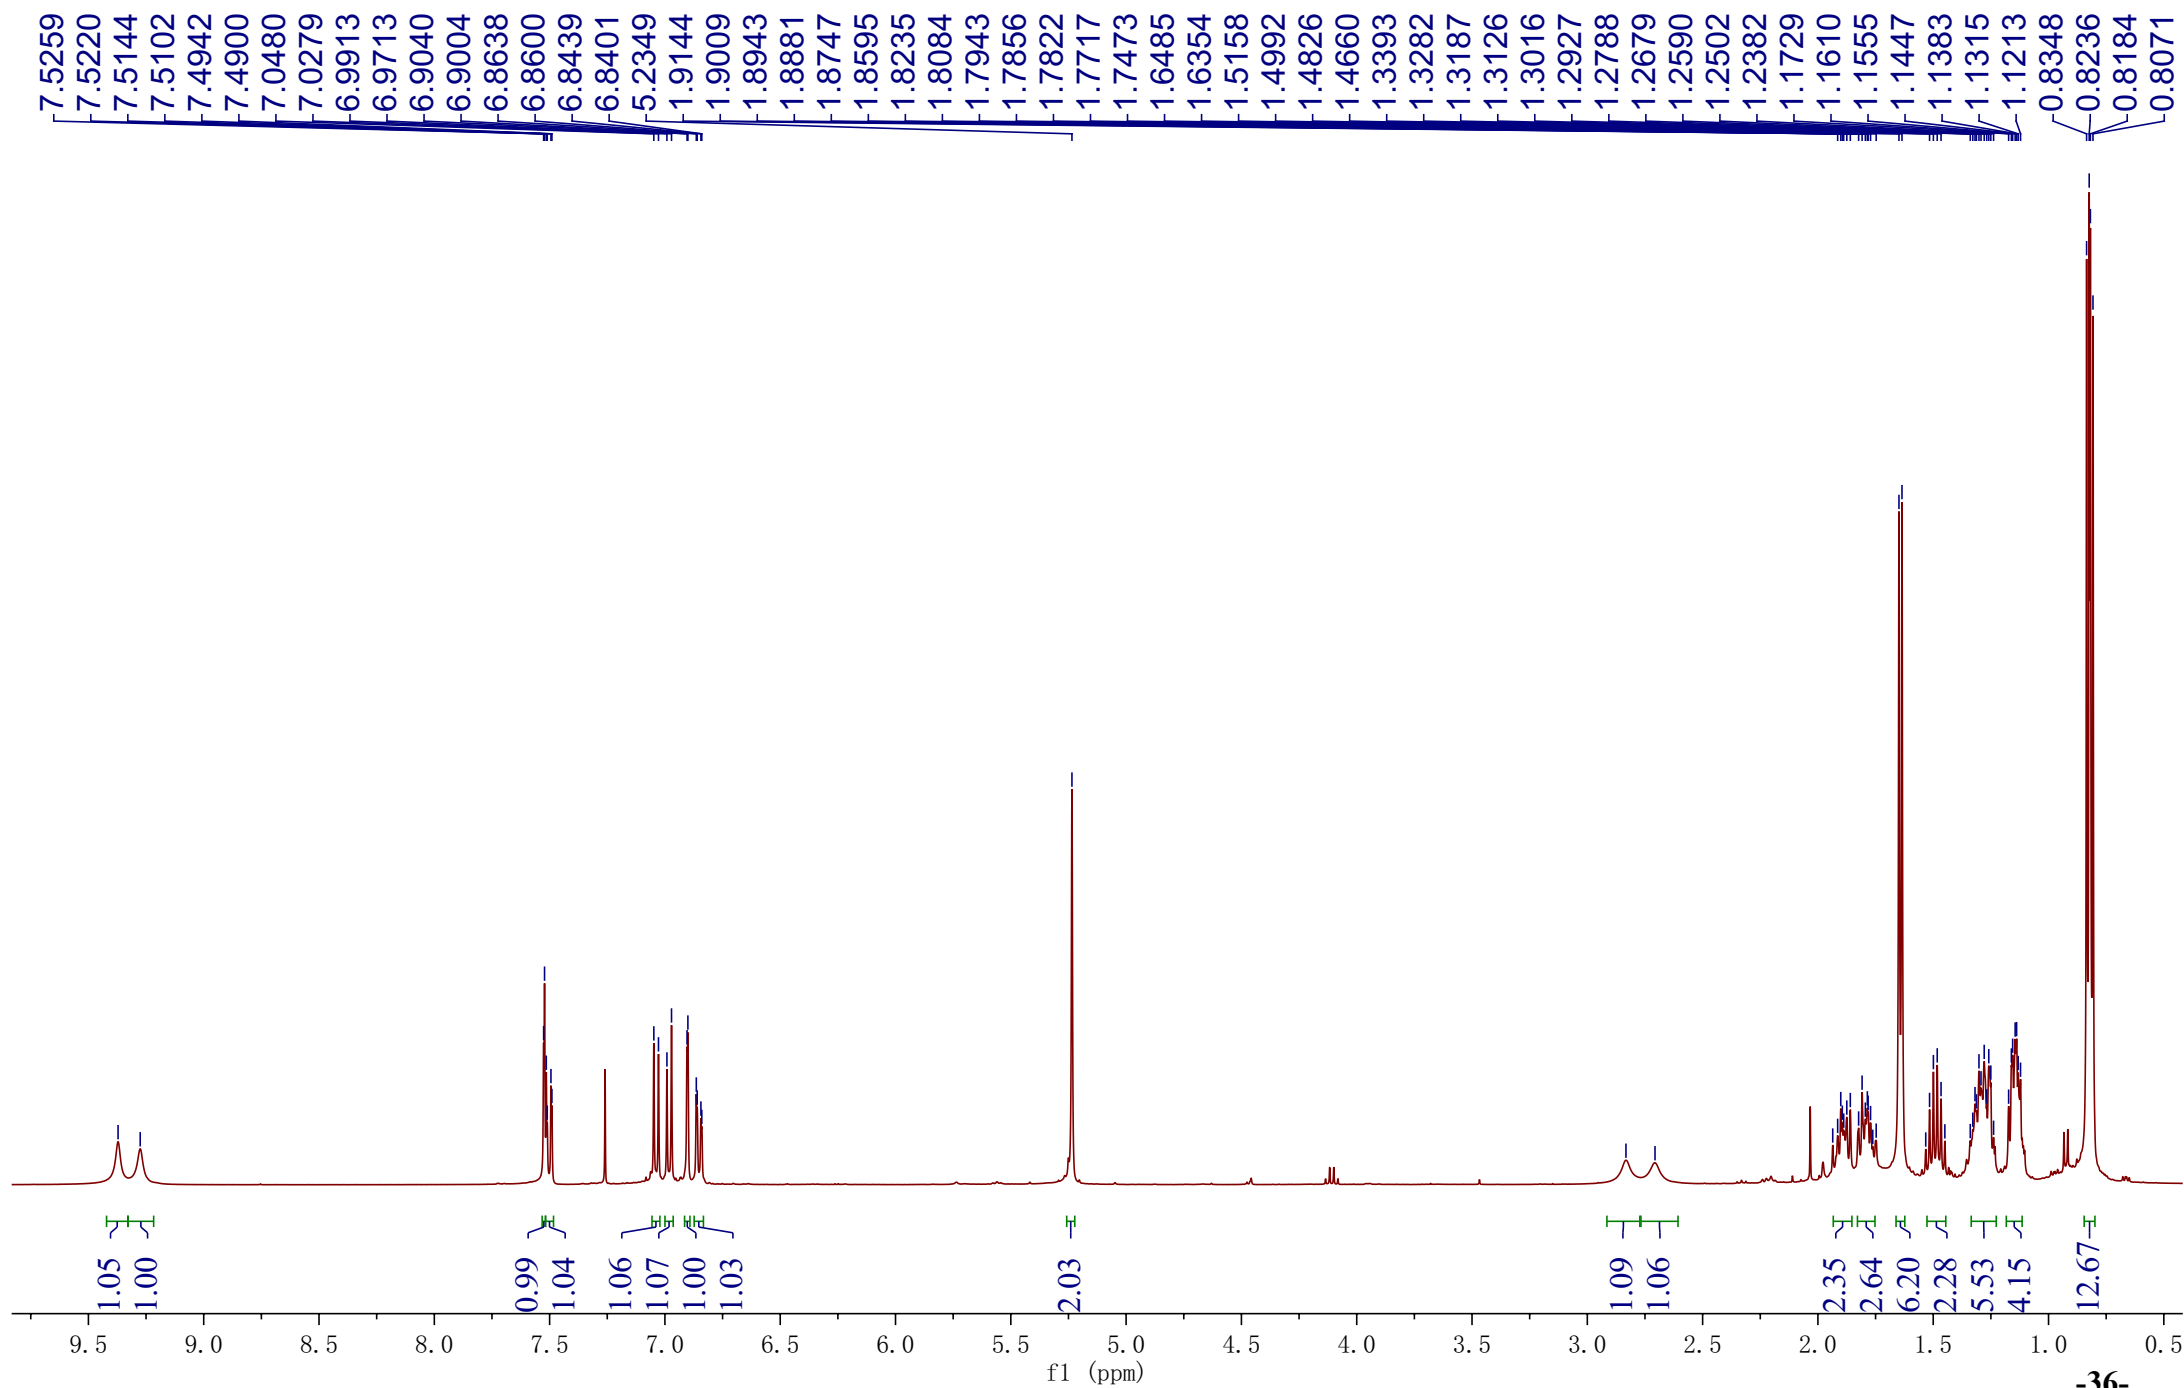



**Figure S25.**  $^{13}\text{C}$  NMR (100 MHz,  $\text{CDCl}_3$ ) Spectrum of Compound **4**

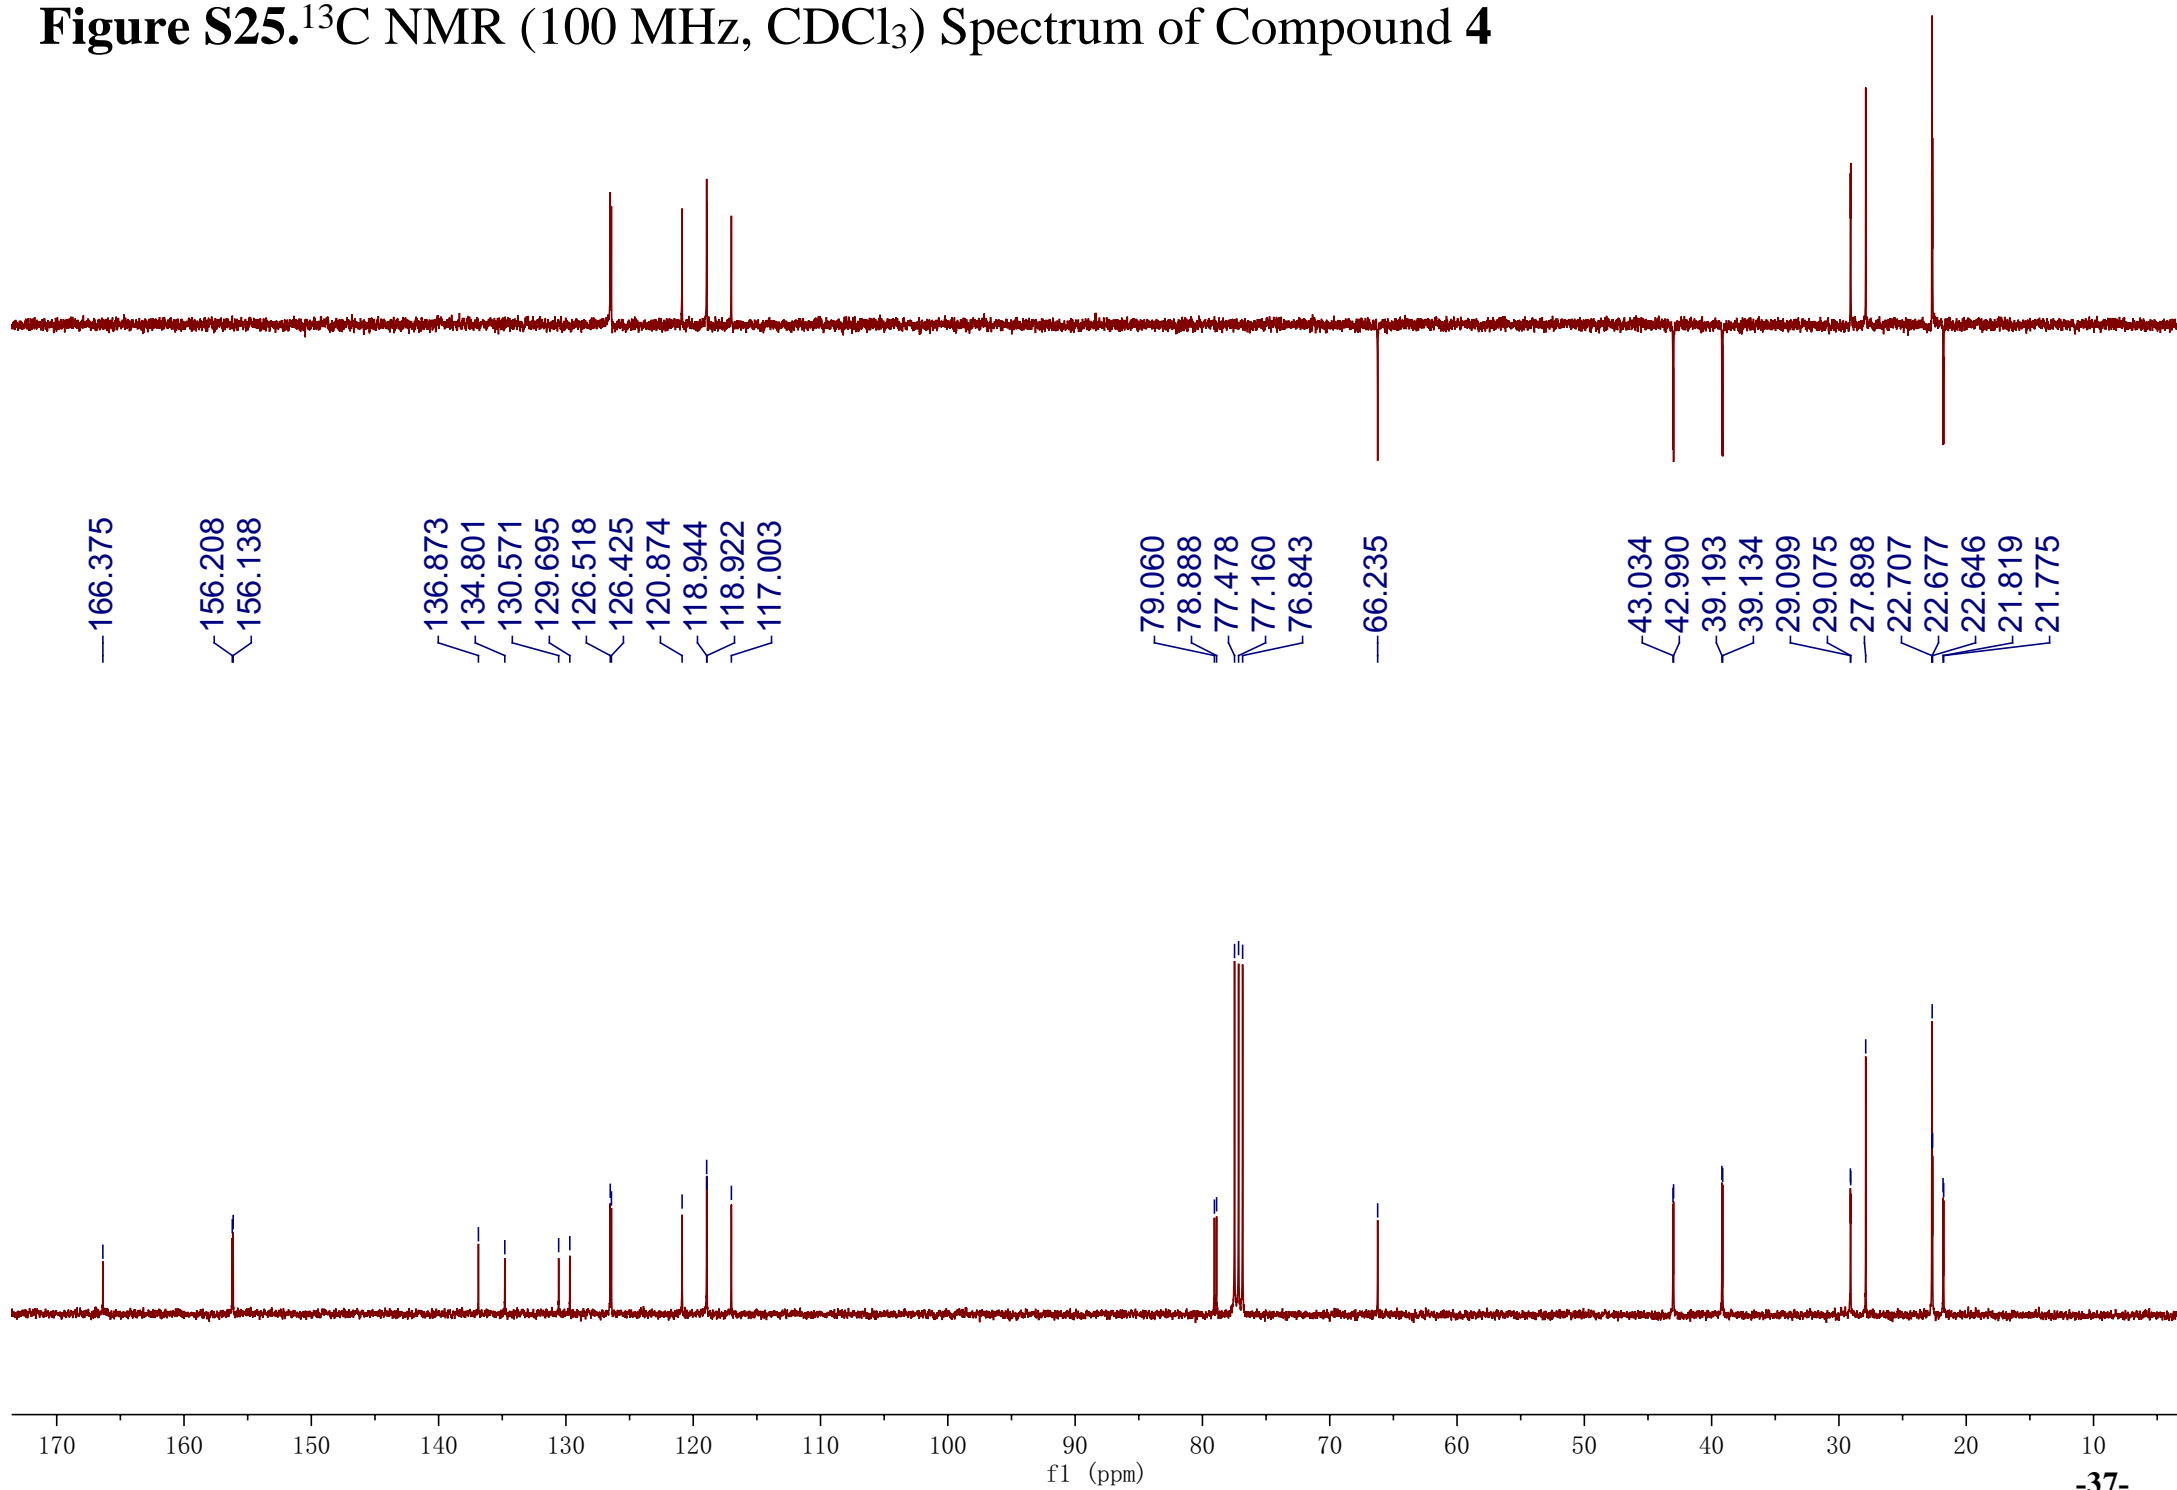

**Figure S26.** HSQC (400 MHz, CDCl<sub>3</sub>) Spectrum of Compound **4**

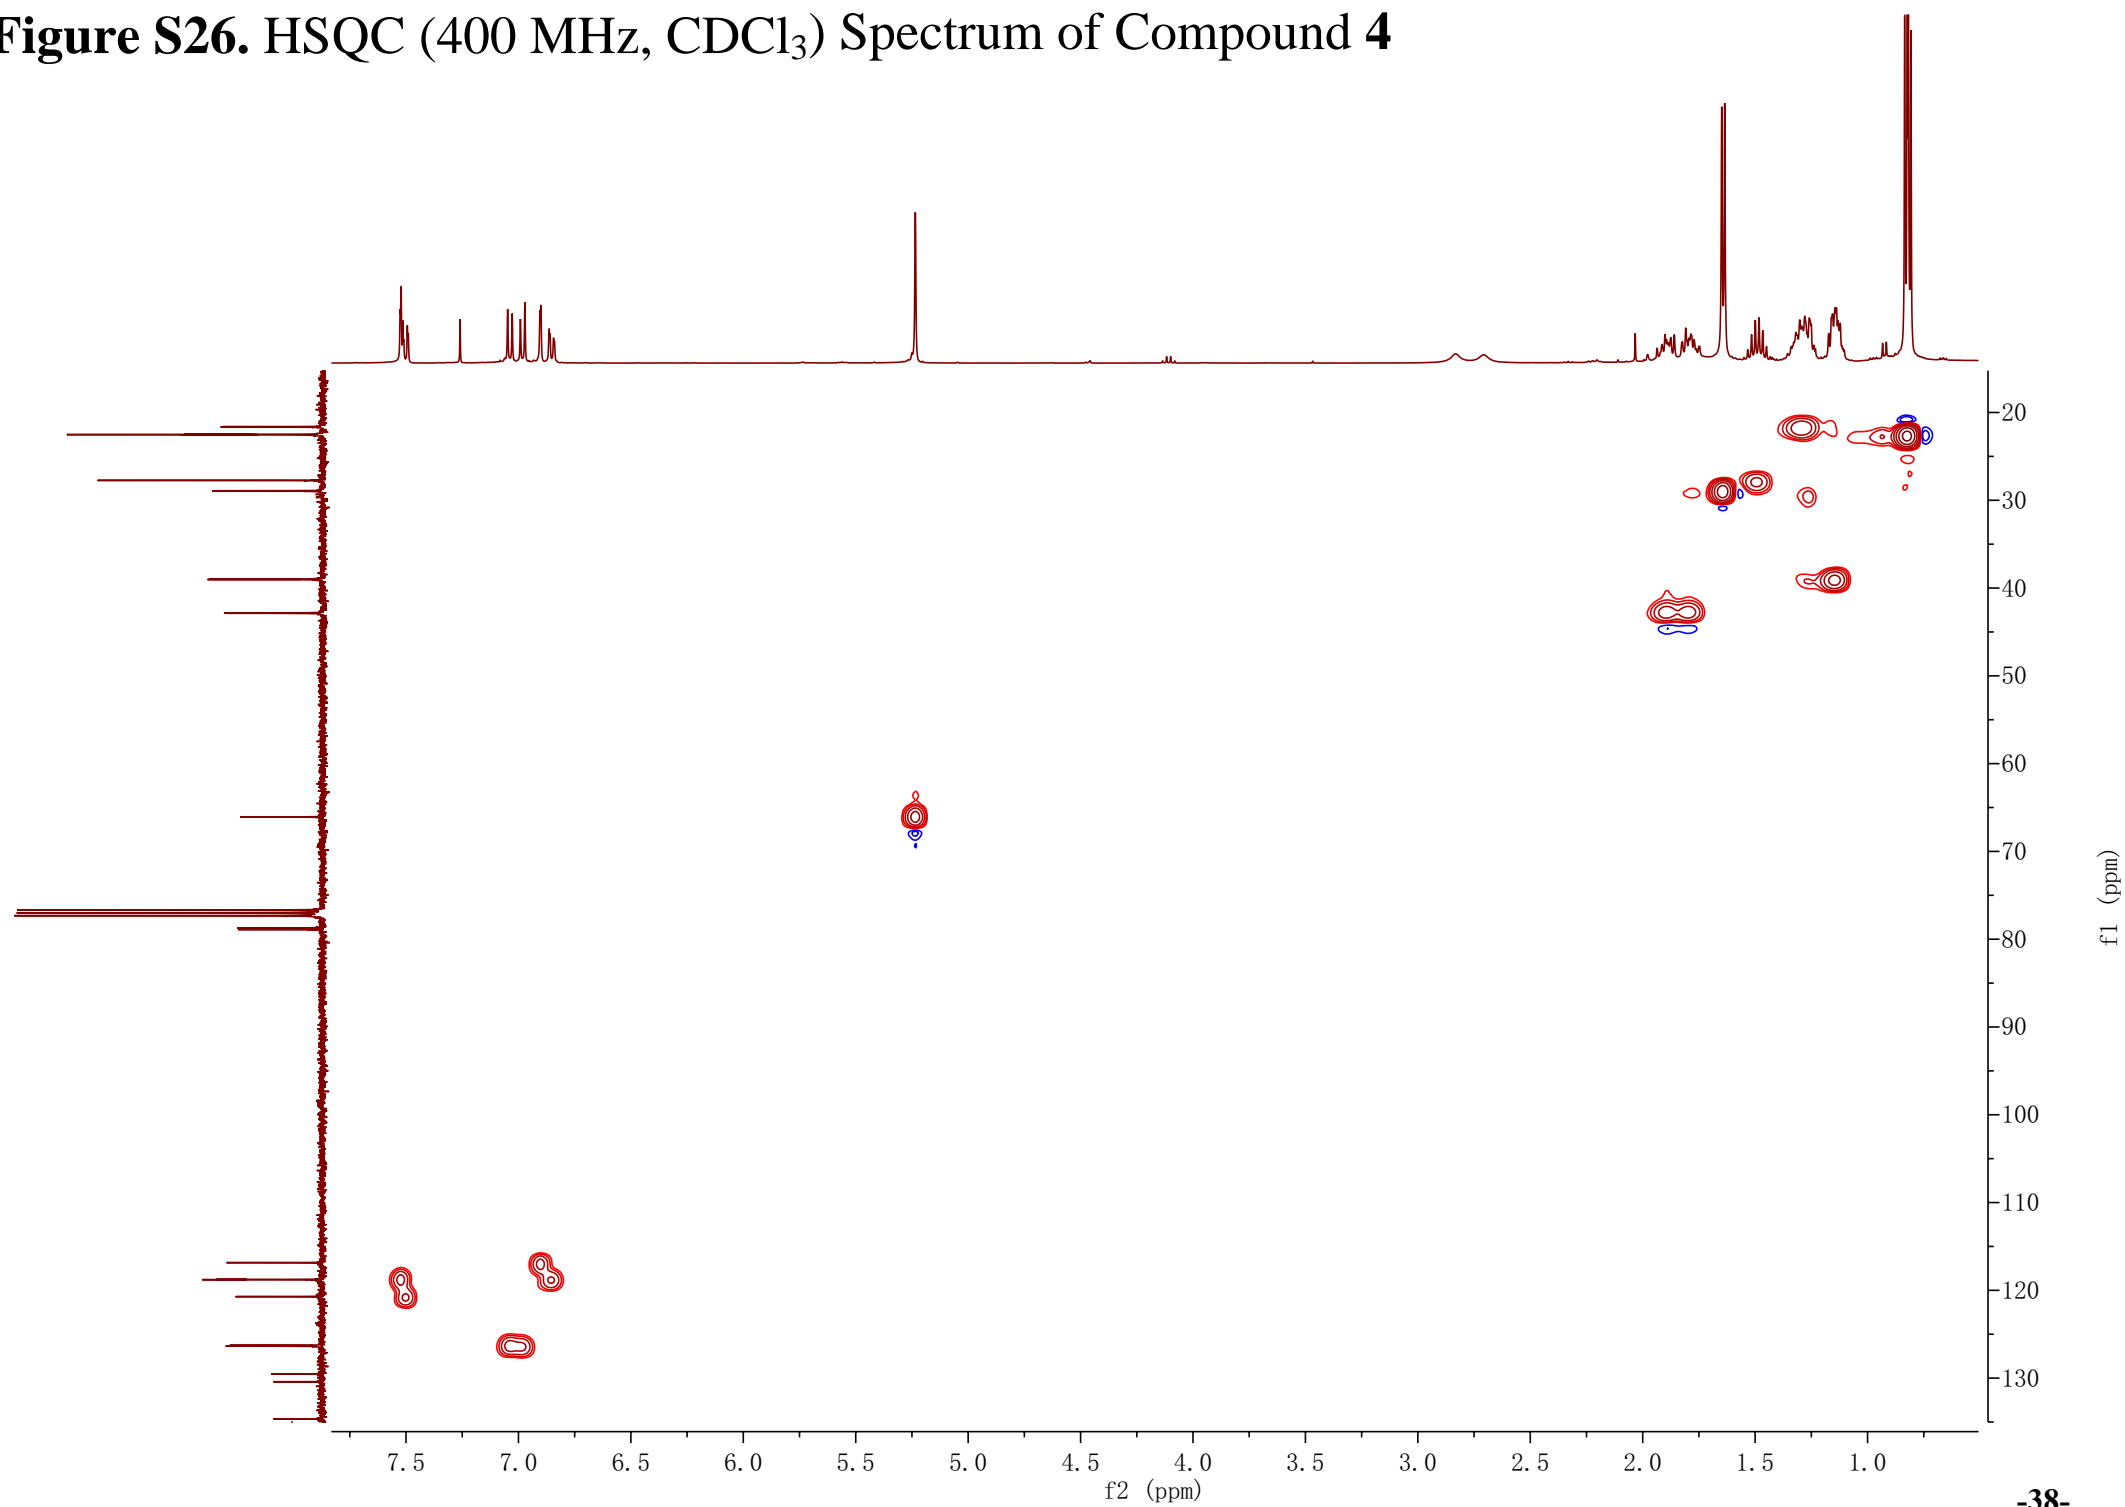

**Figure S27.**  $^1\text{H}$ - $^1\text{H}$  COSY (400 MHz,  $\text{CDCl}_3$ ) Spectrum of Compound **4**

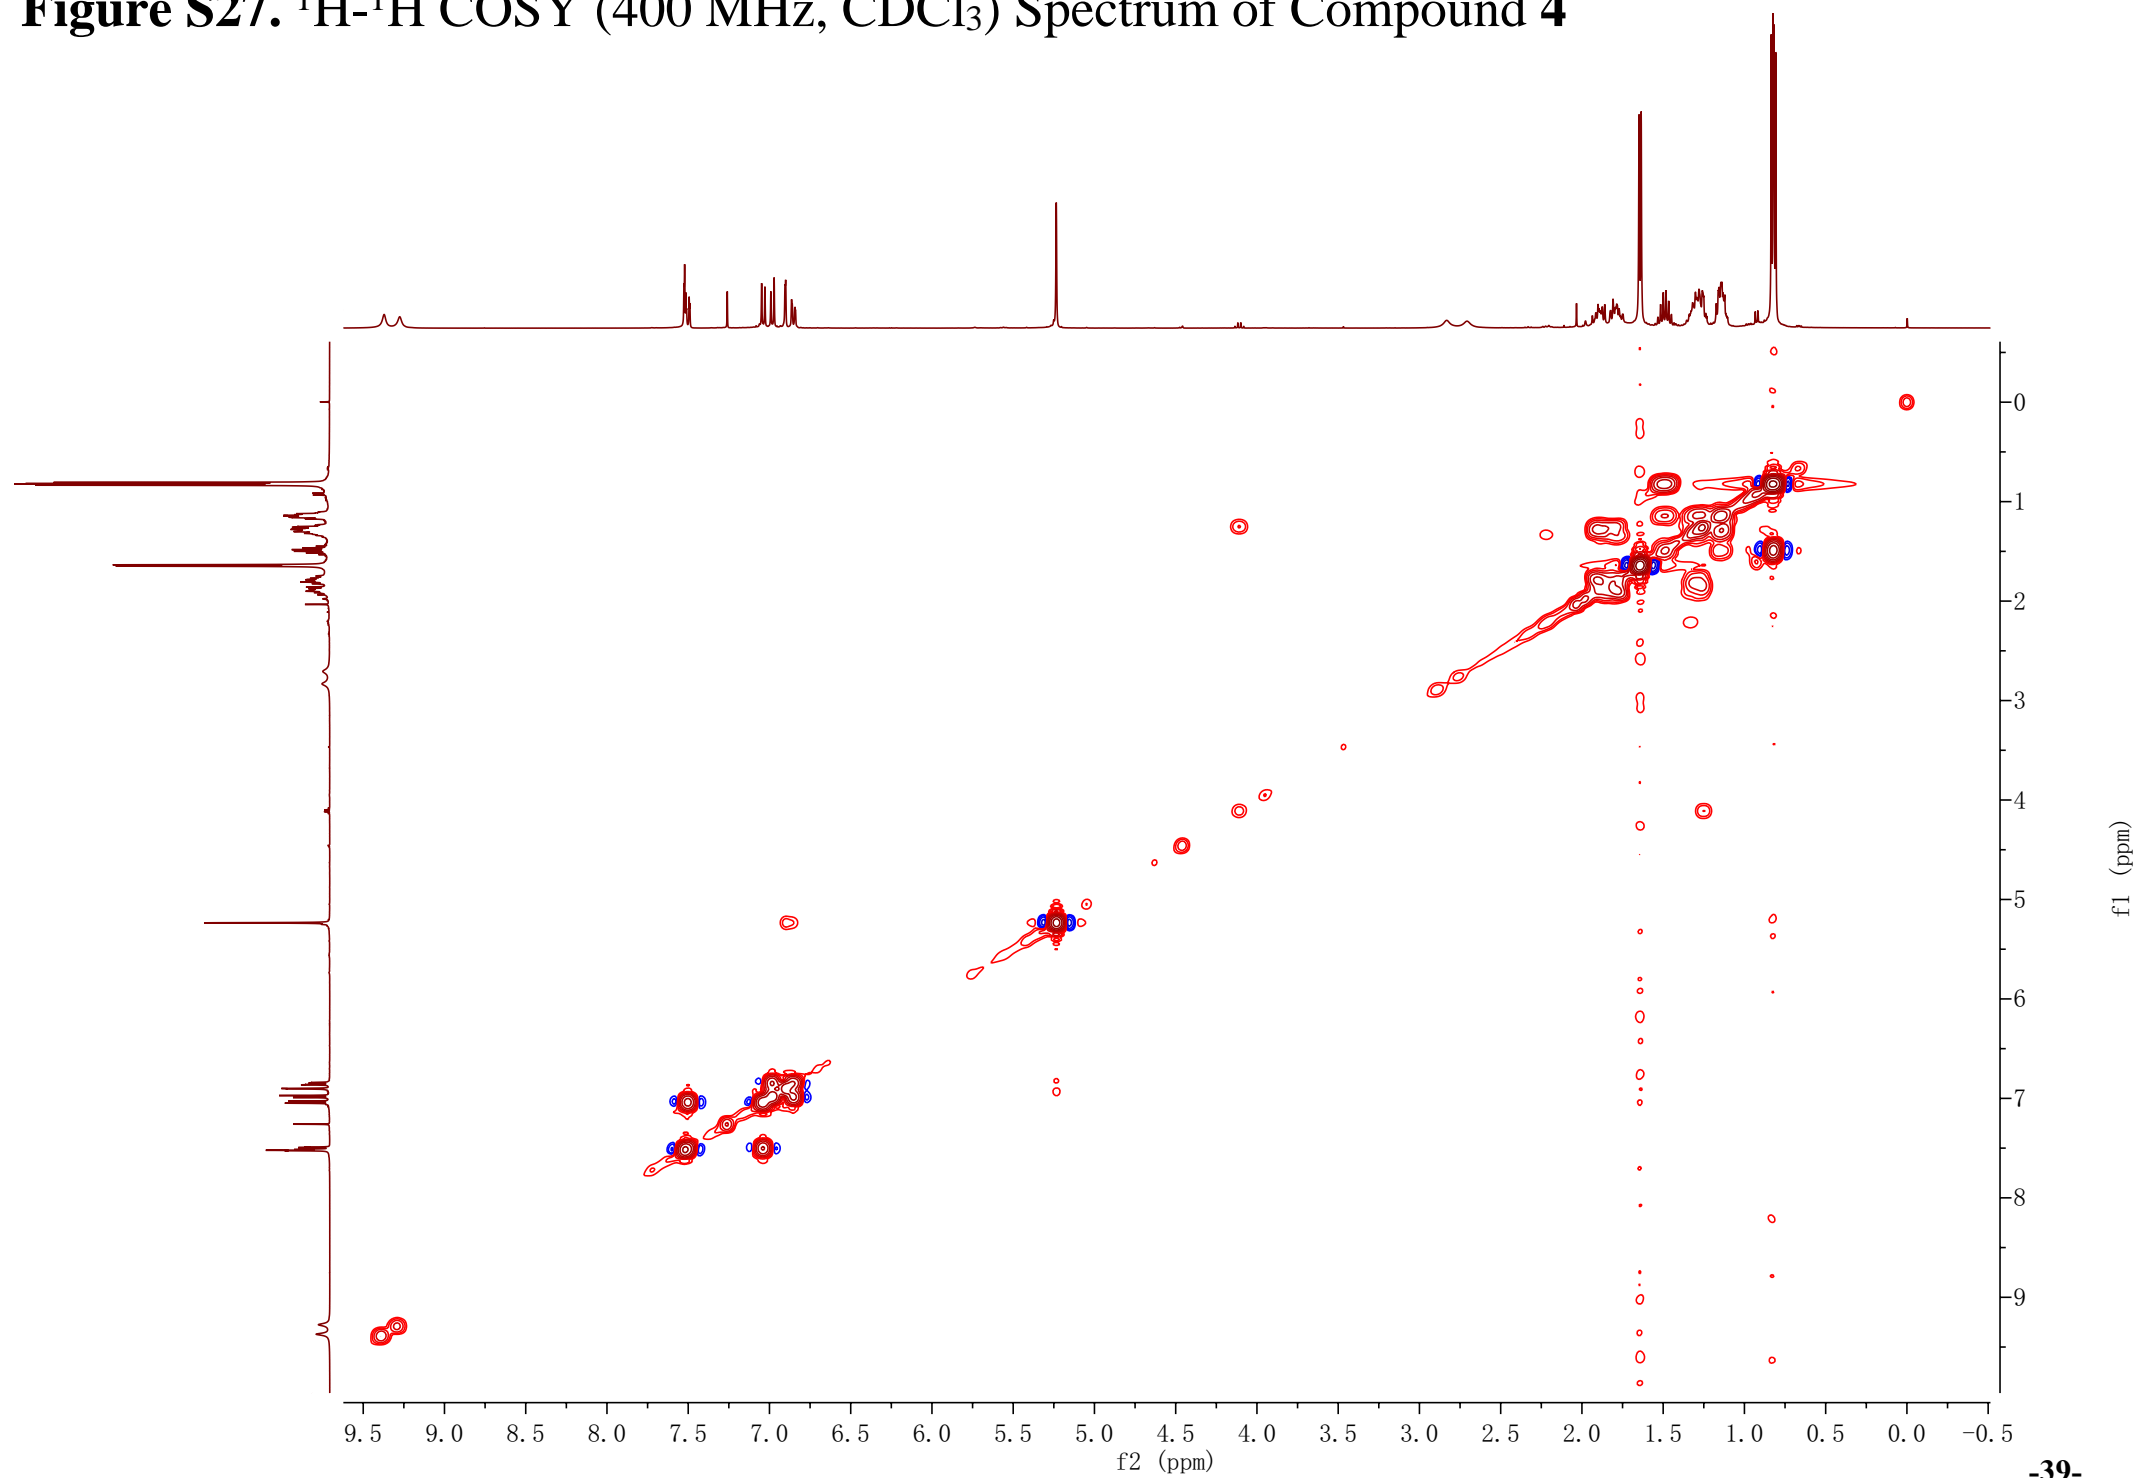

**Figure S28.** HMBC (400 MHz, CDCl<sub>3</sub>) Spectrum of Compound **4**

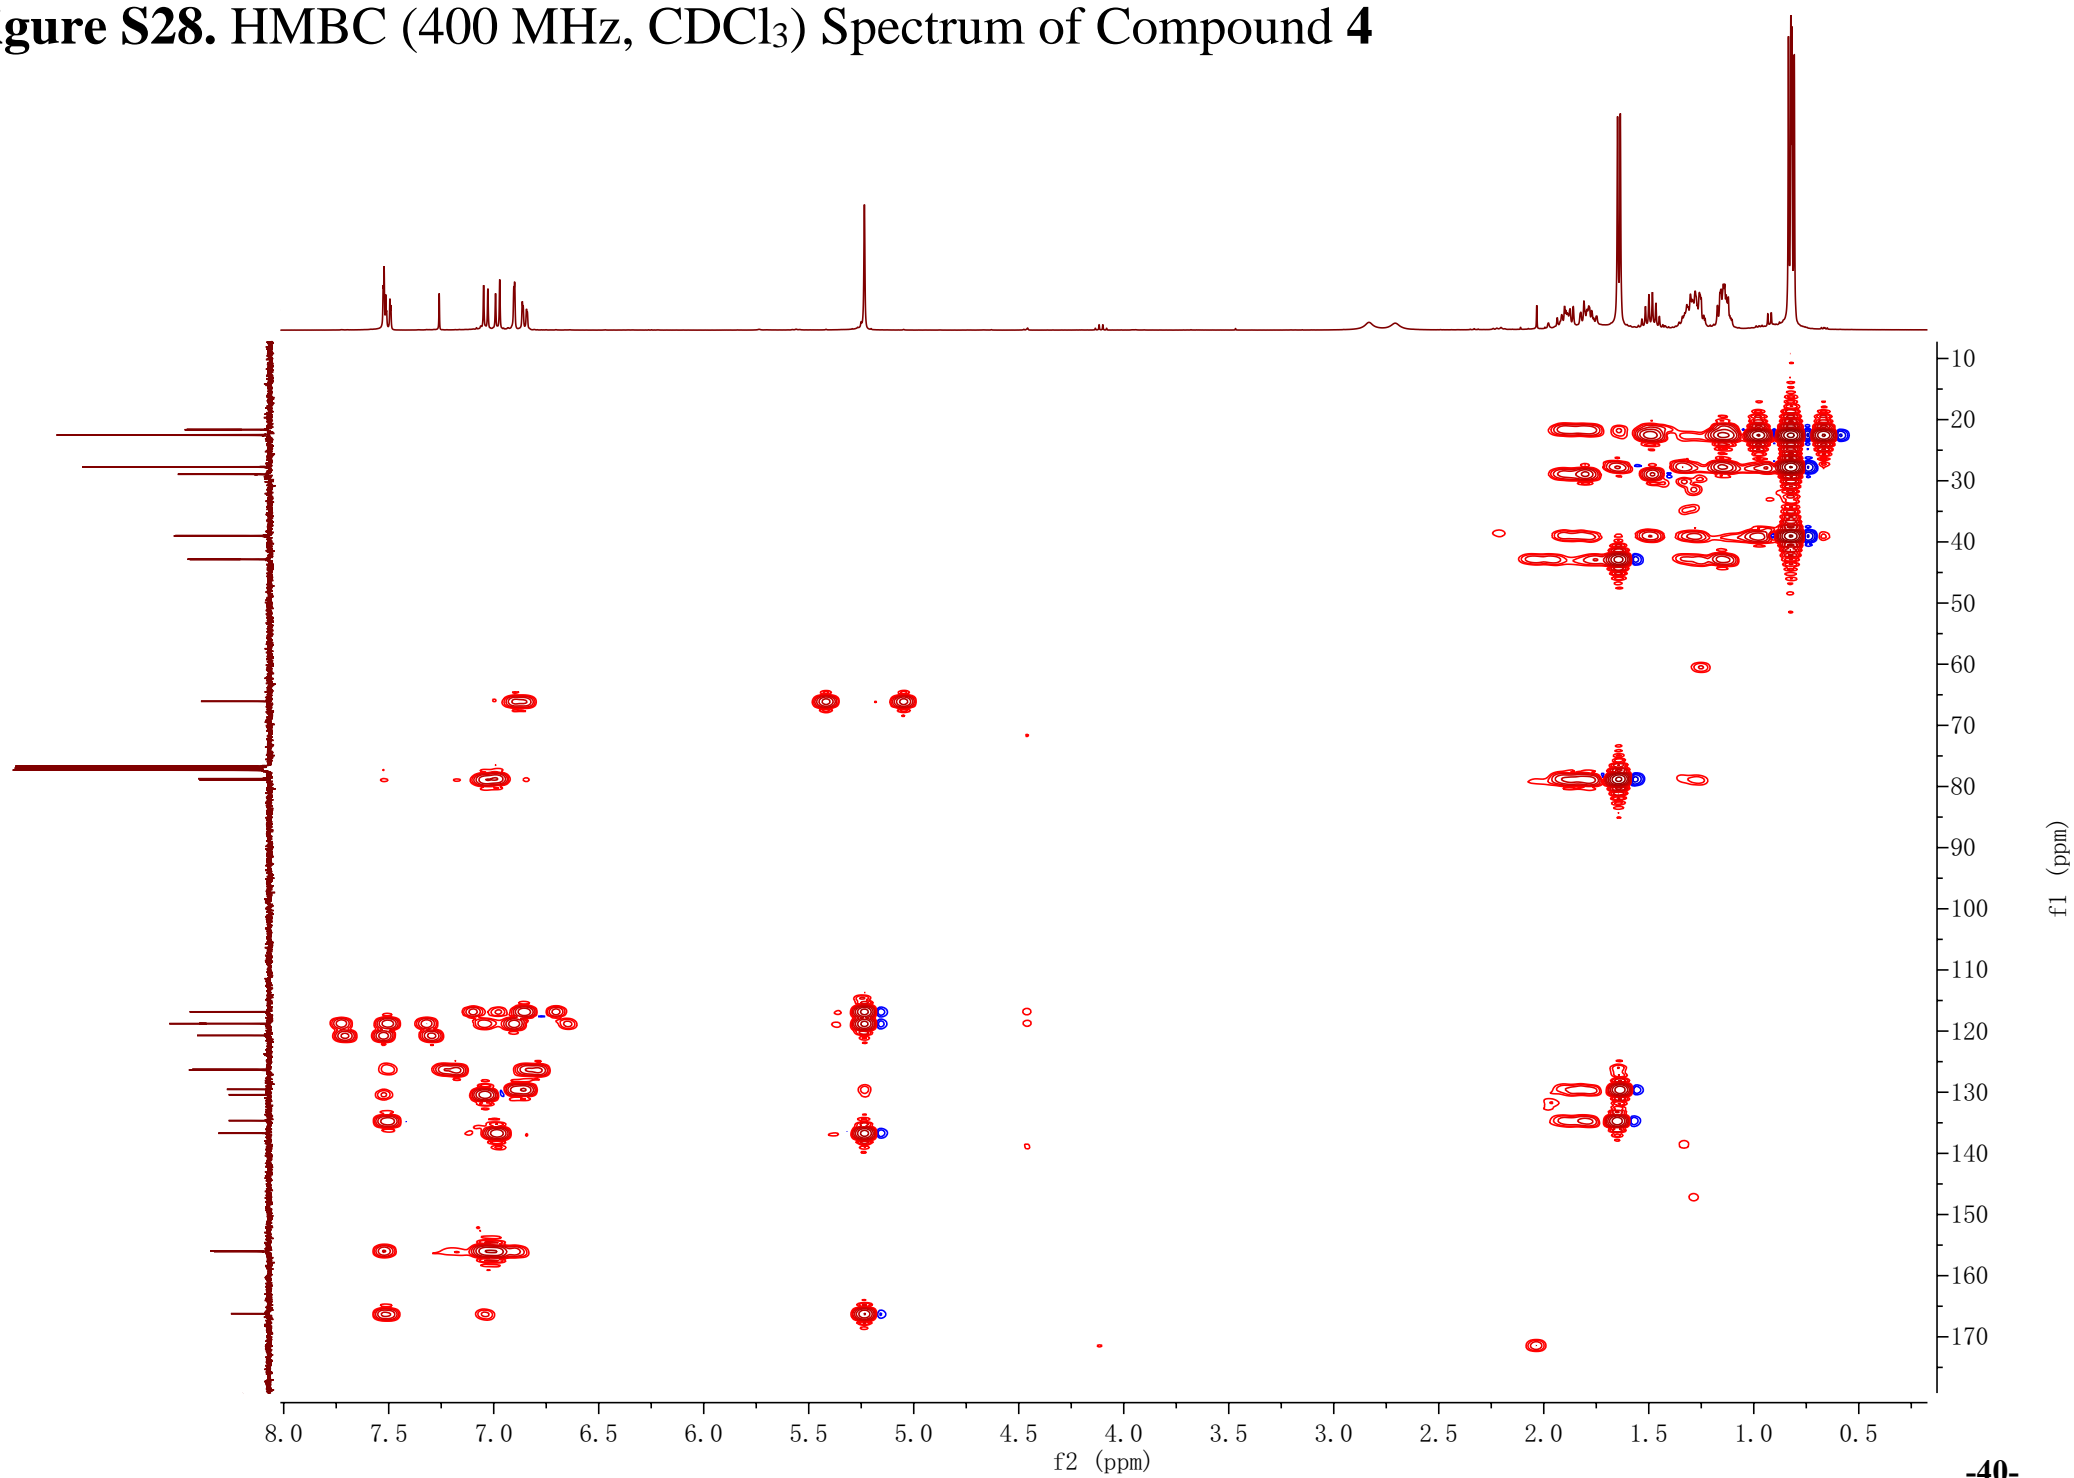

**Figure S29.**  $^1\text{H}$  NMR (400 MHz,  $\text{CDCl}_3$ ) Spectrum of Compound **5**

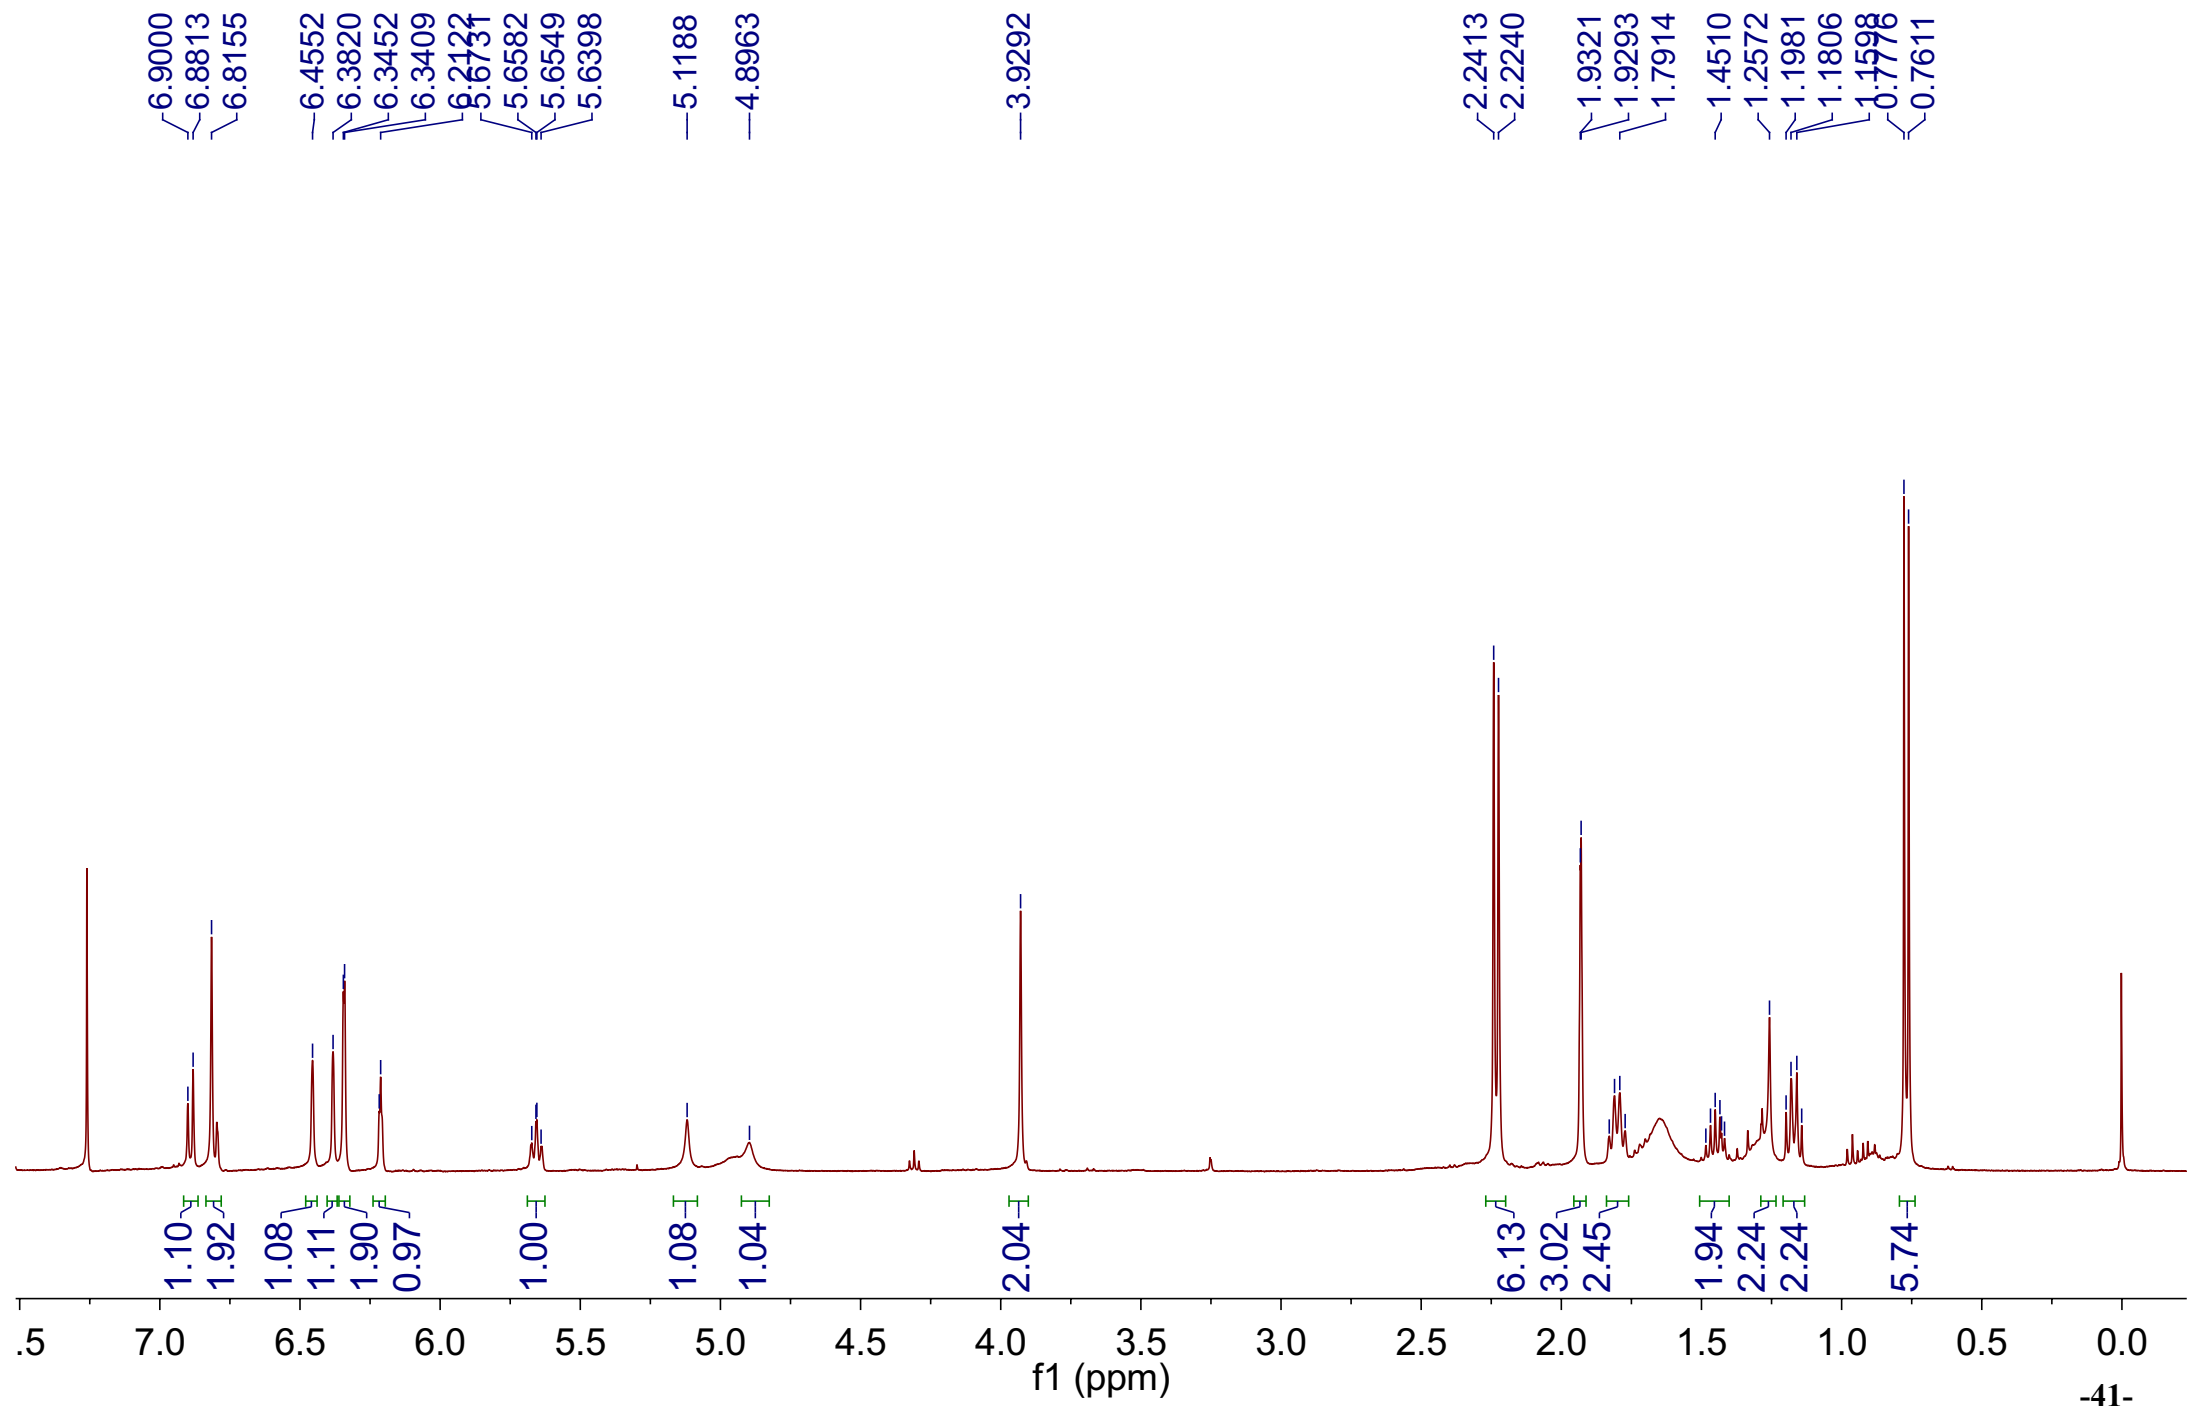

**Figure S30.**  $^{13}\text{C}$  NMR (100 MHz,  $\text{CDCl}_3$ ) Spectrum of Compound **5**

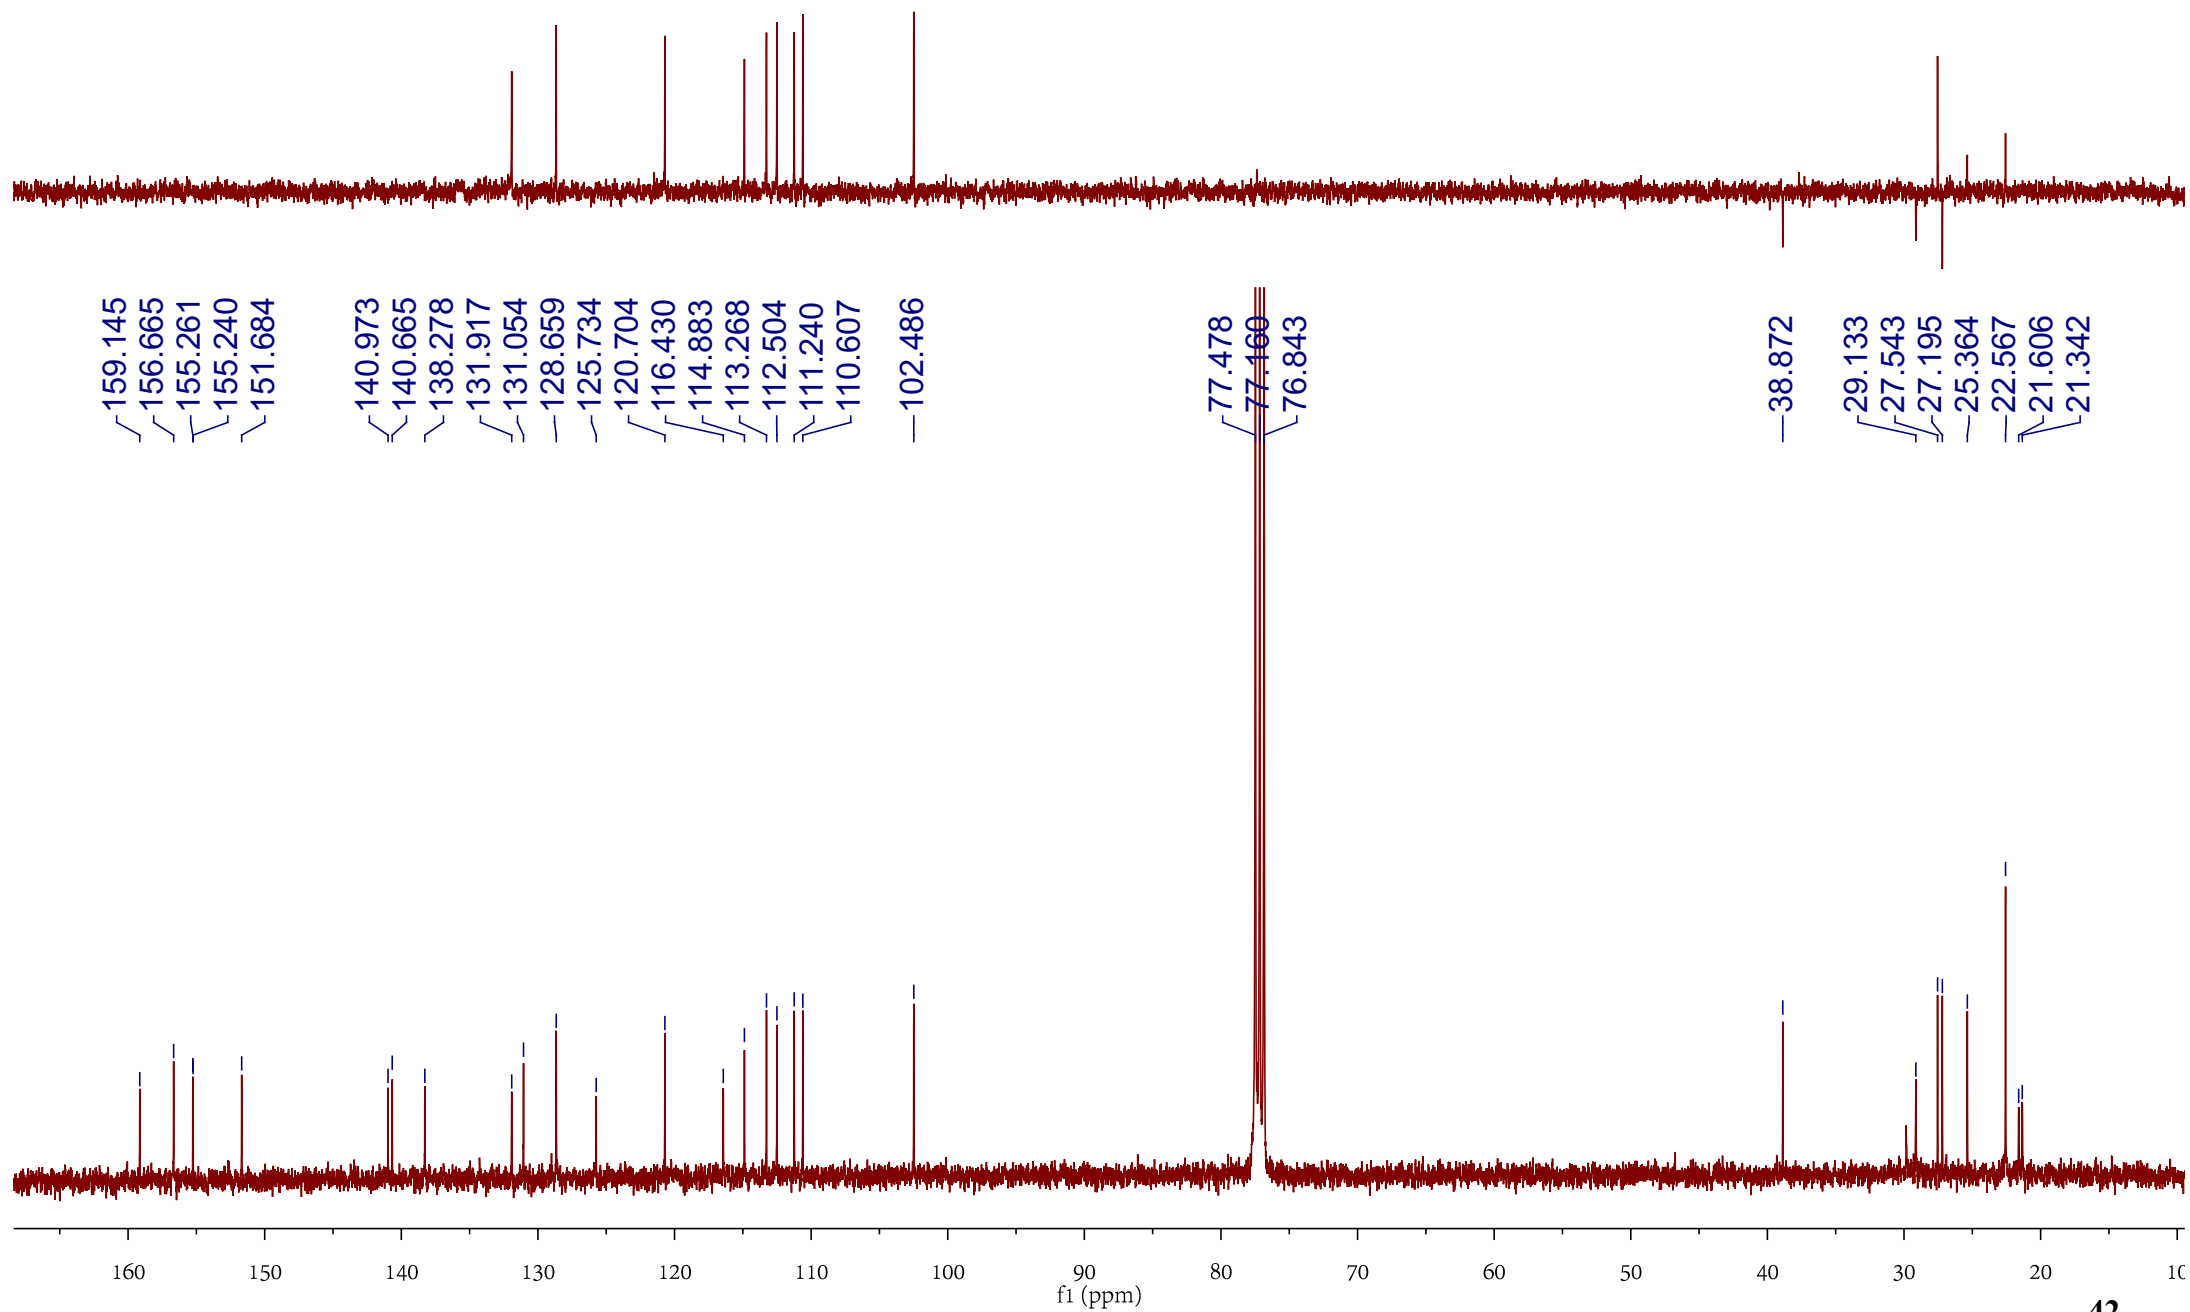

**Figure S31.** HSQC (400 MHz, CDCl<sub>3</sub>) Spectrum of Compound **5**

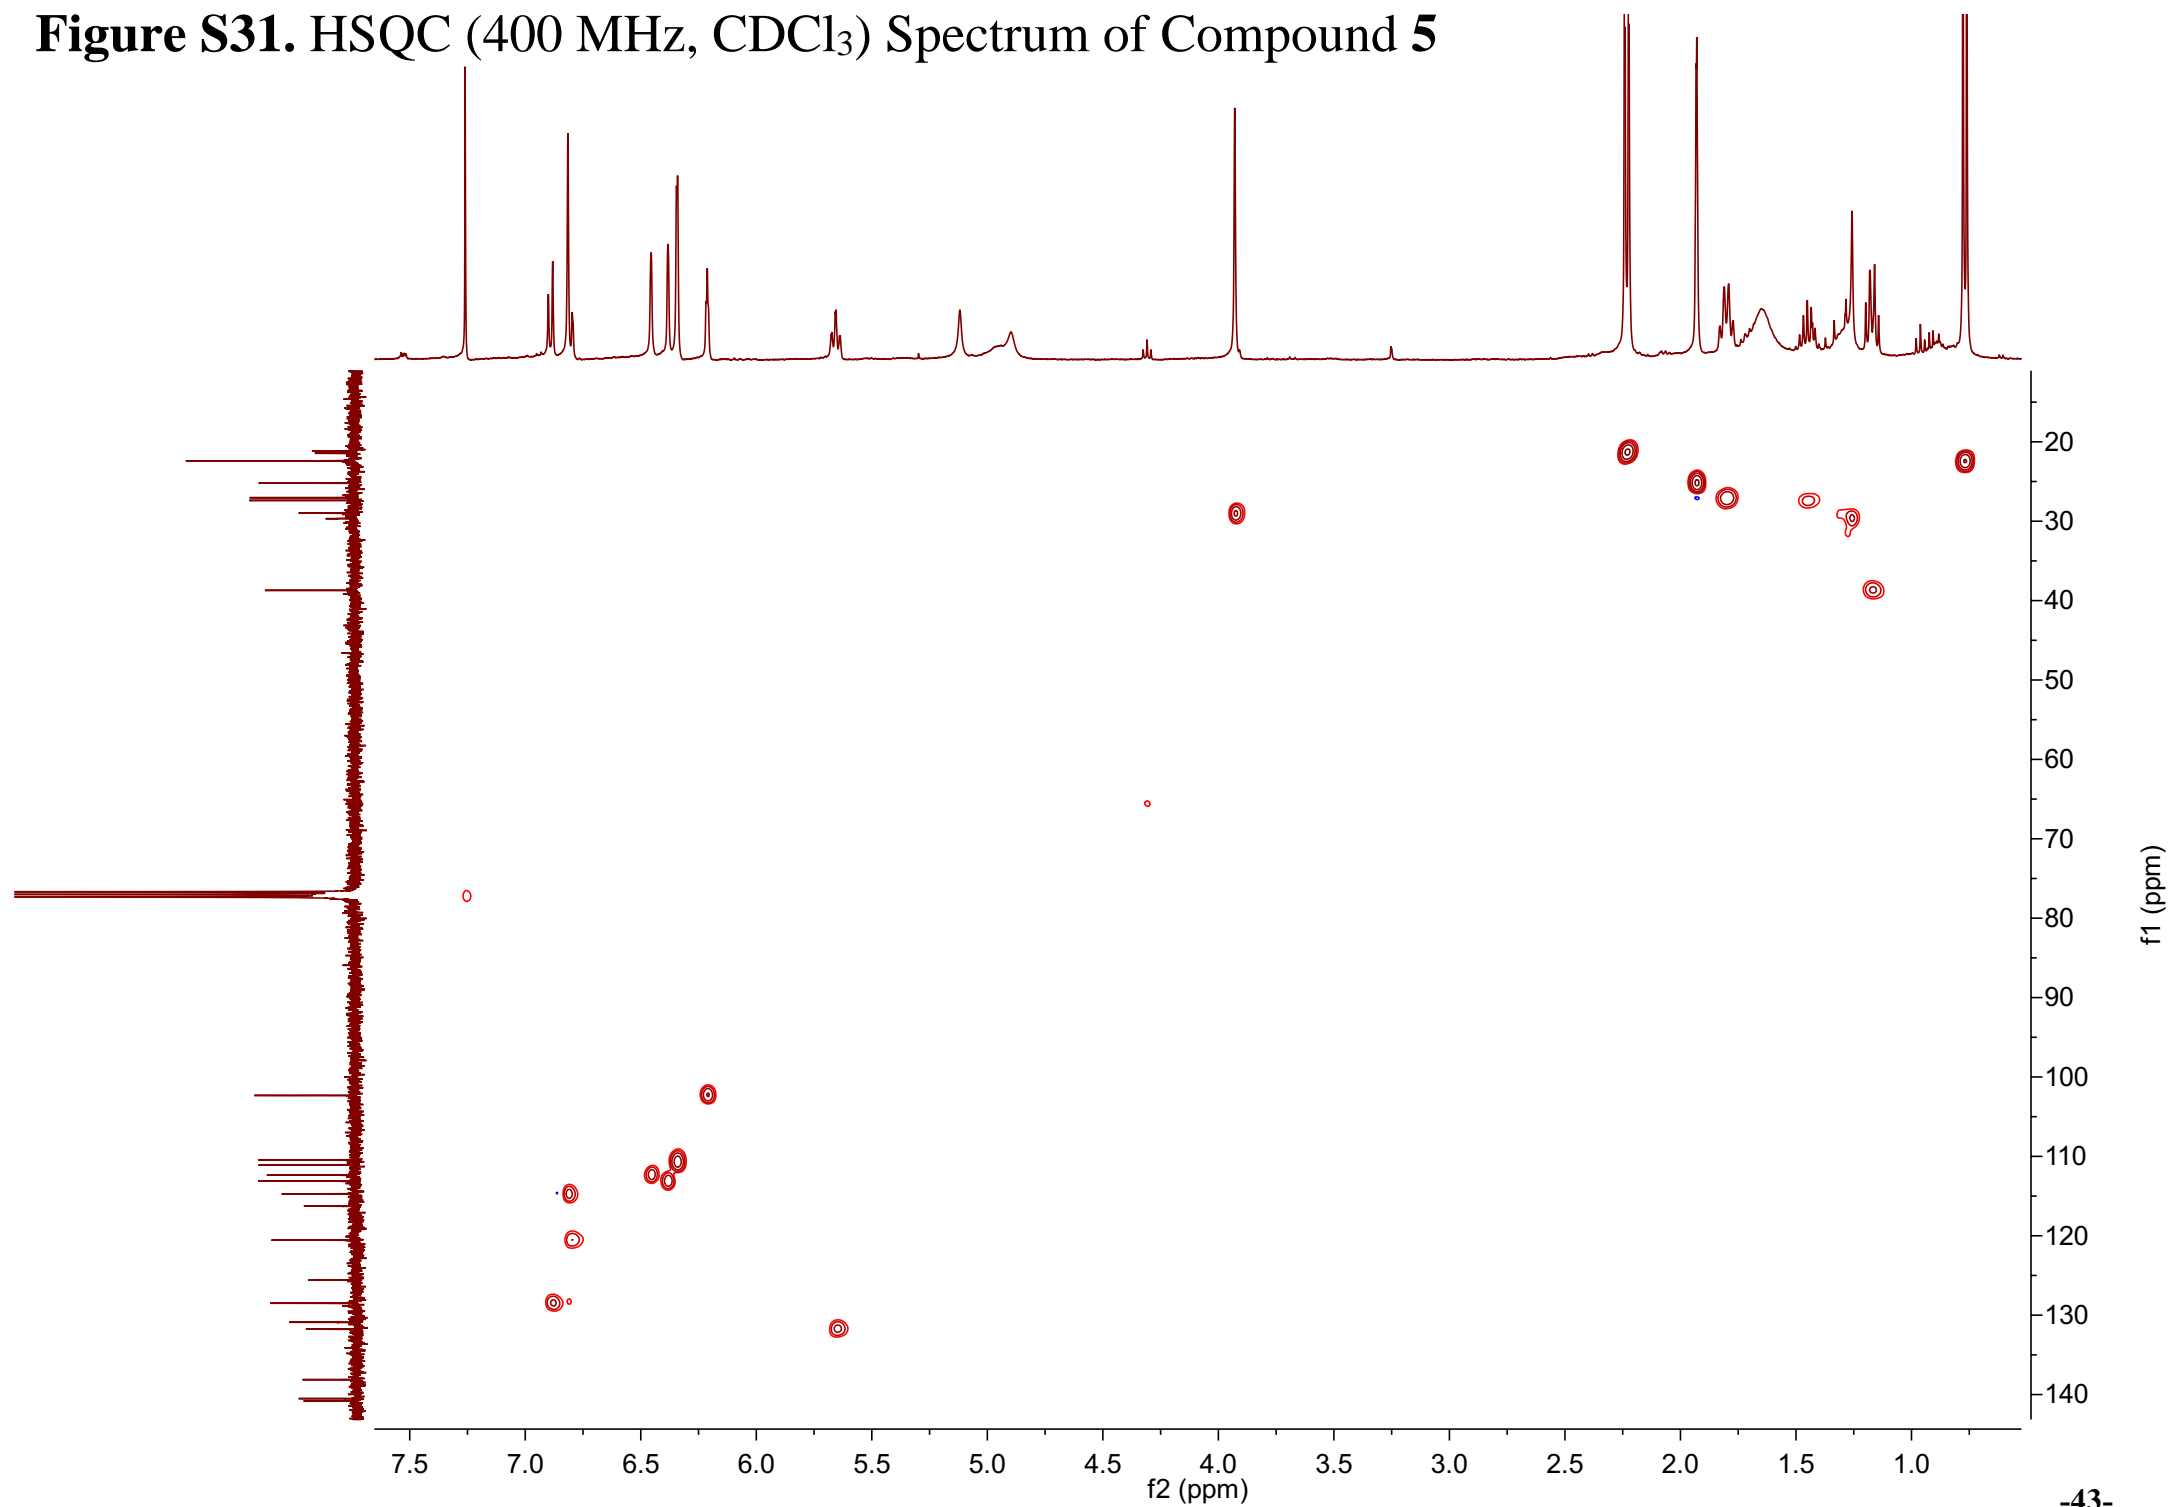

**Figure S32.**  $^1\text{H}$ - $^1\text{H}$  COSY (400 MHz,  $\text{CDCl}_3$ ) Spectrum of Compound **5**

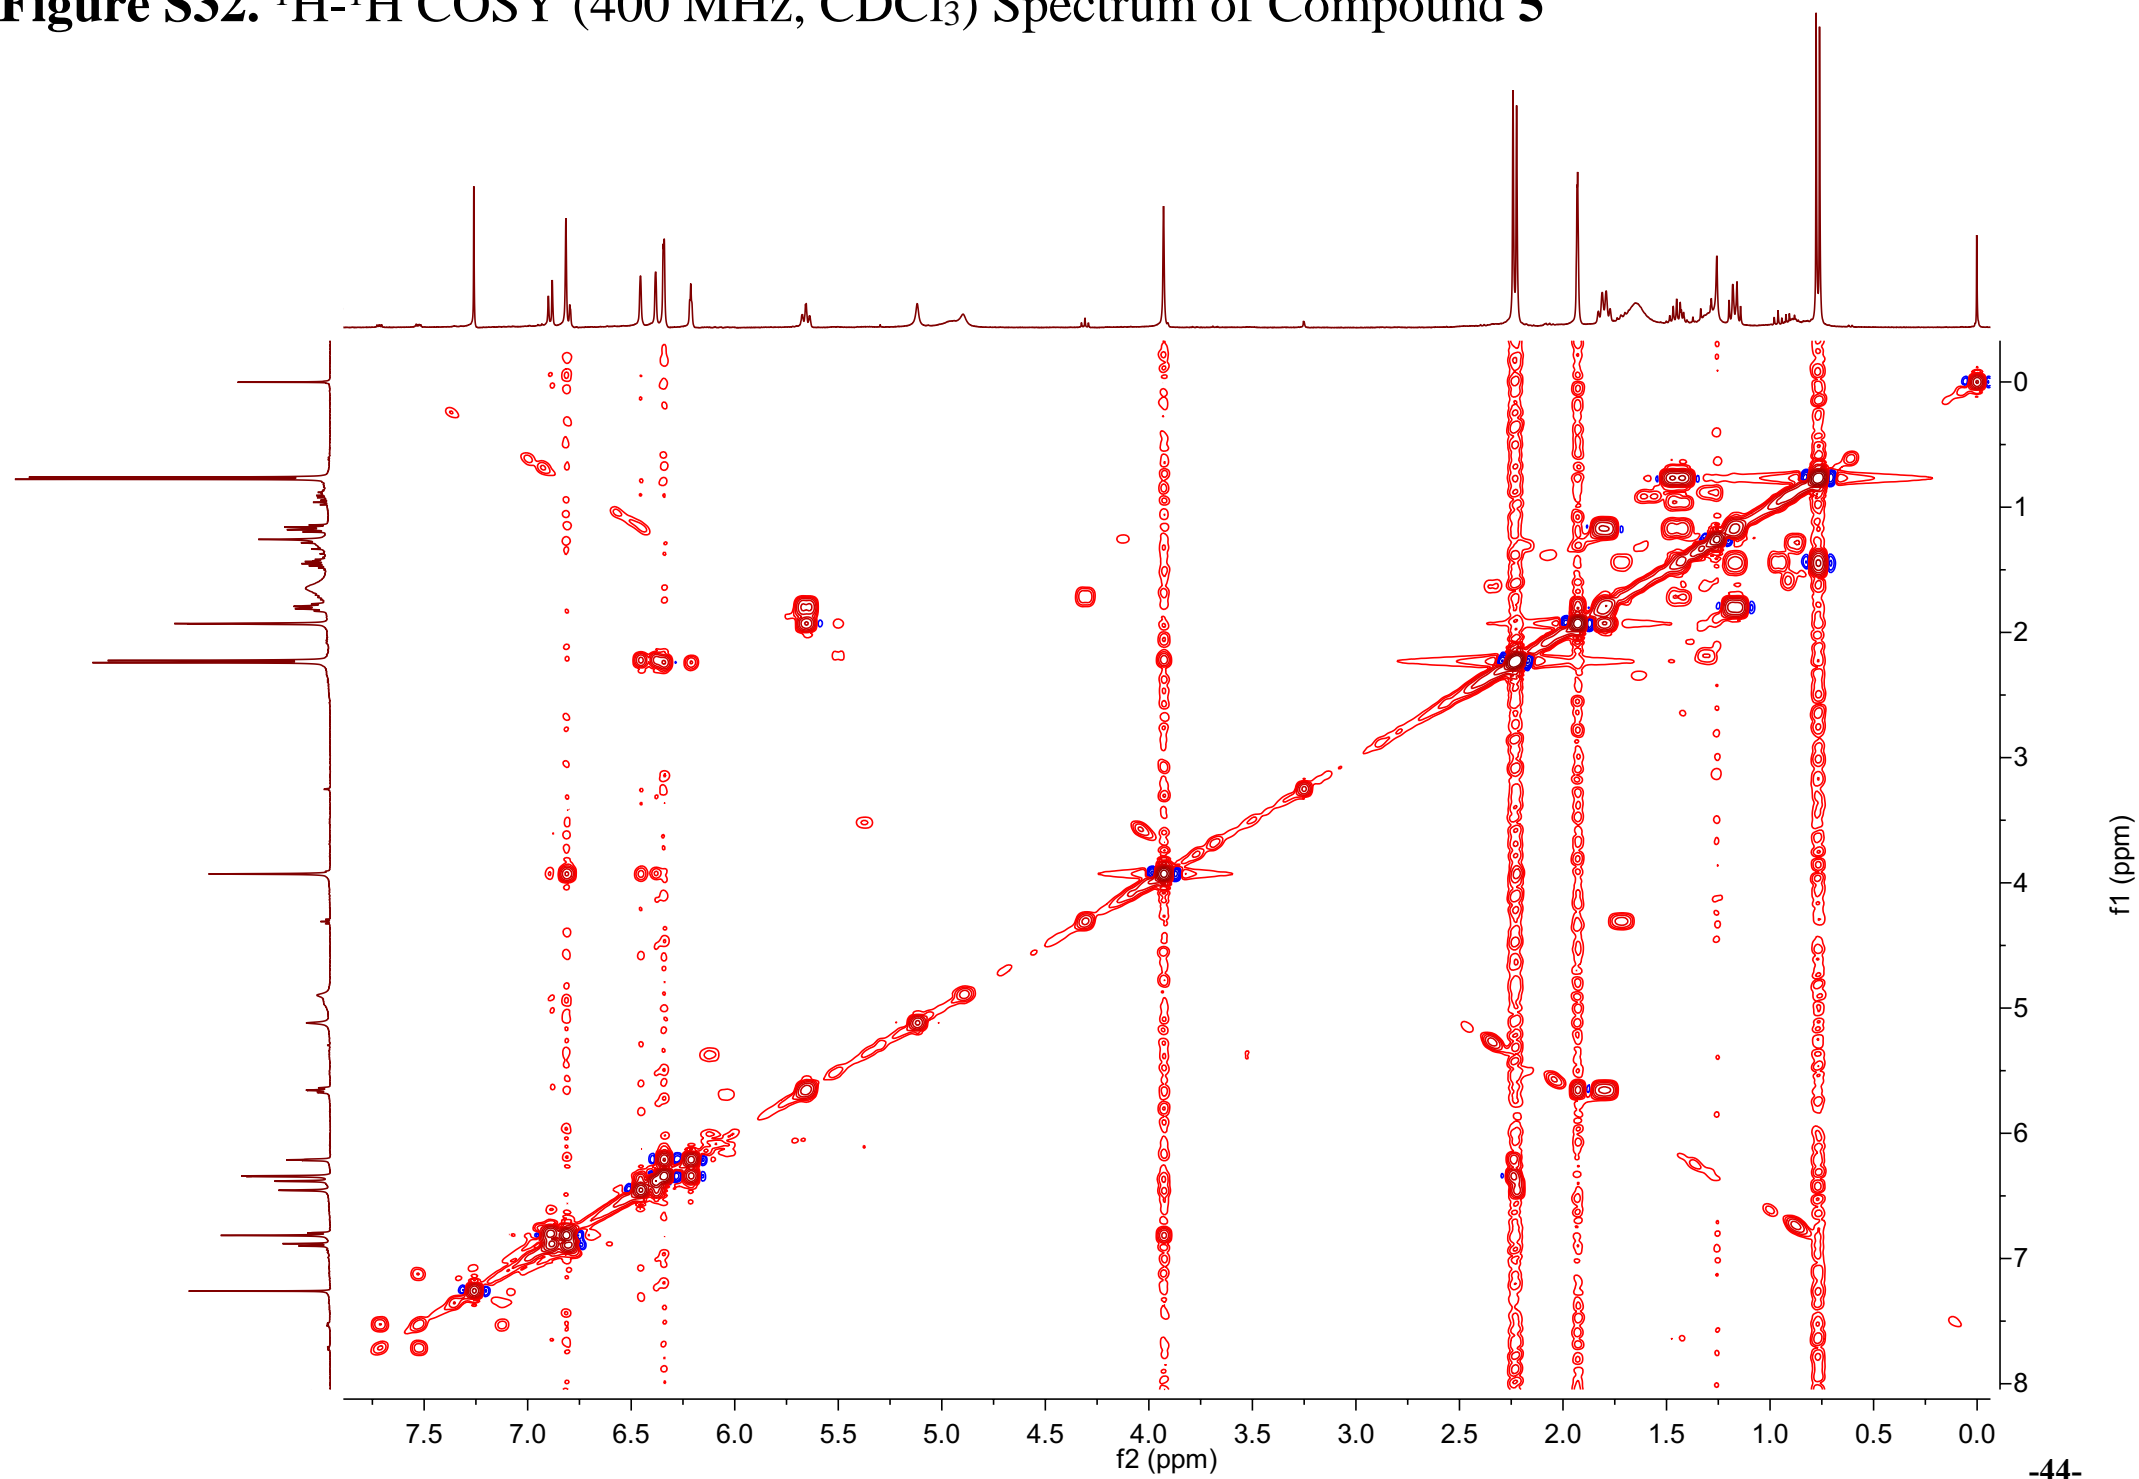



**Figure S33.** HMBC (400 MHz, CDCl<sub>3</sub>) Spectrum of Compound **5**

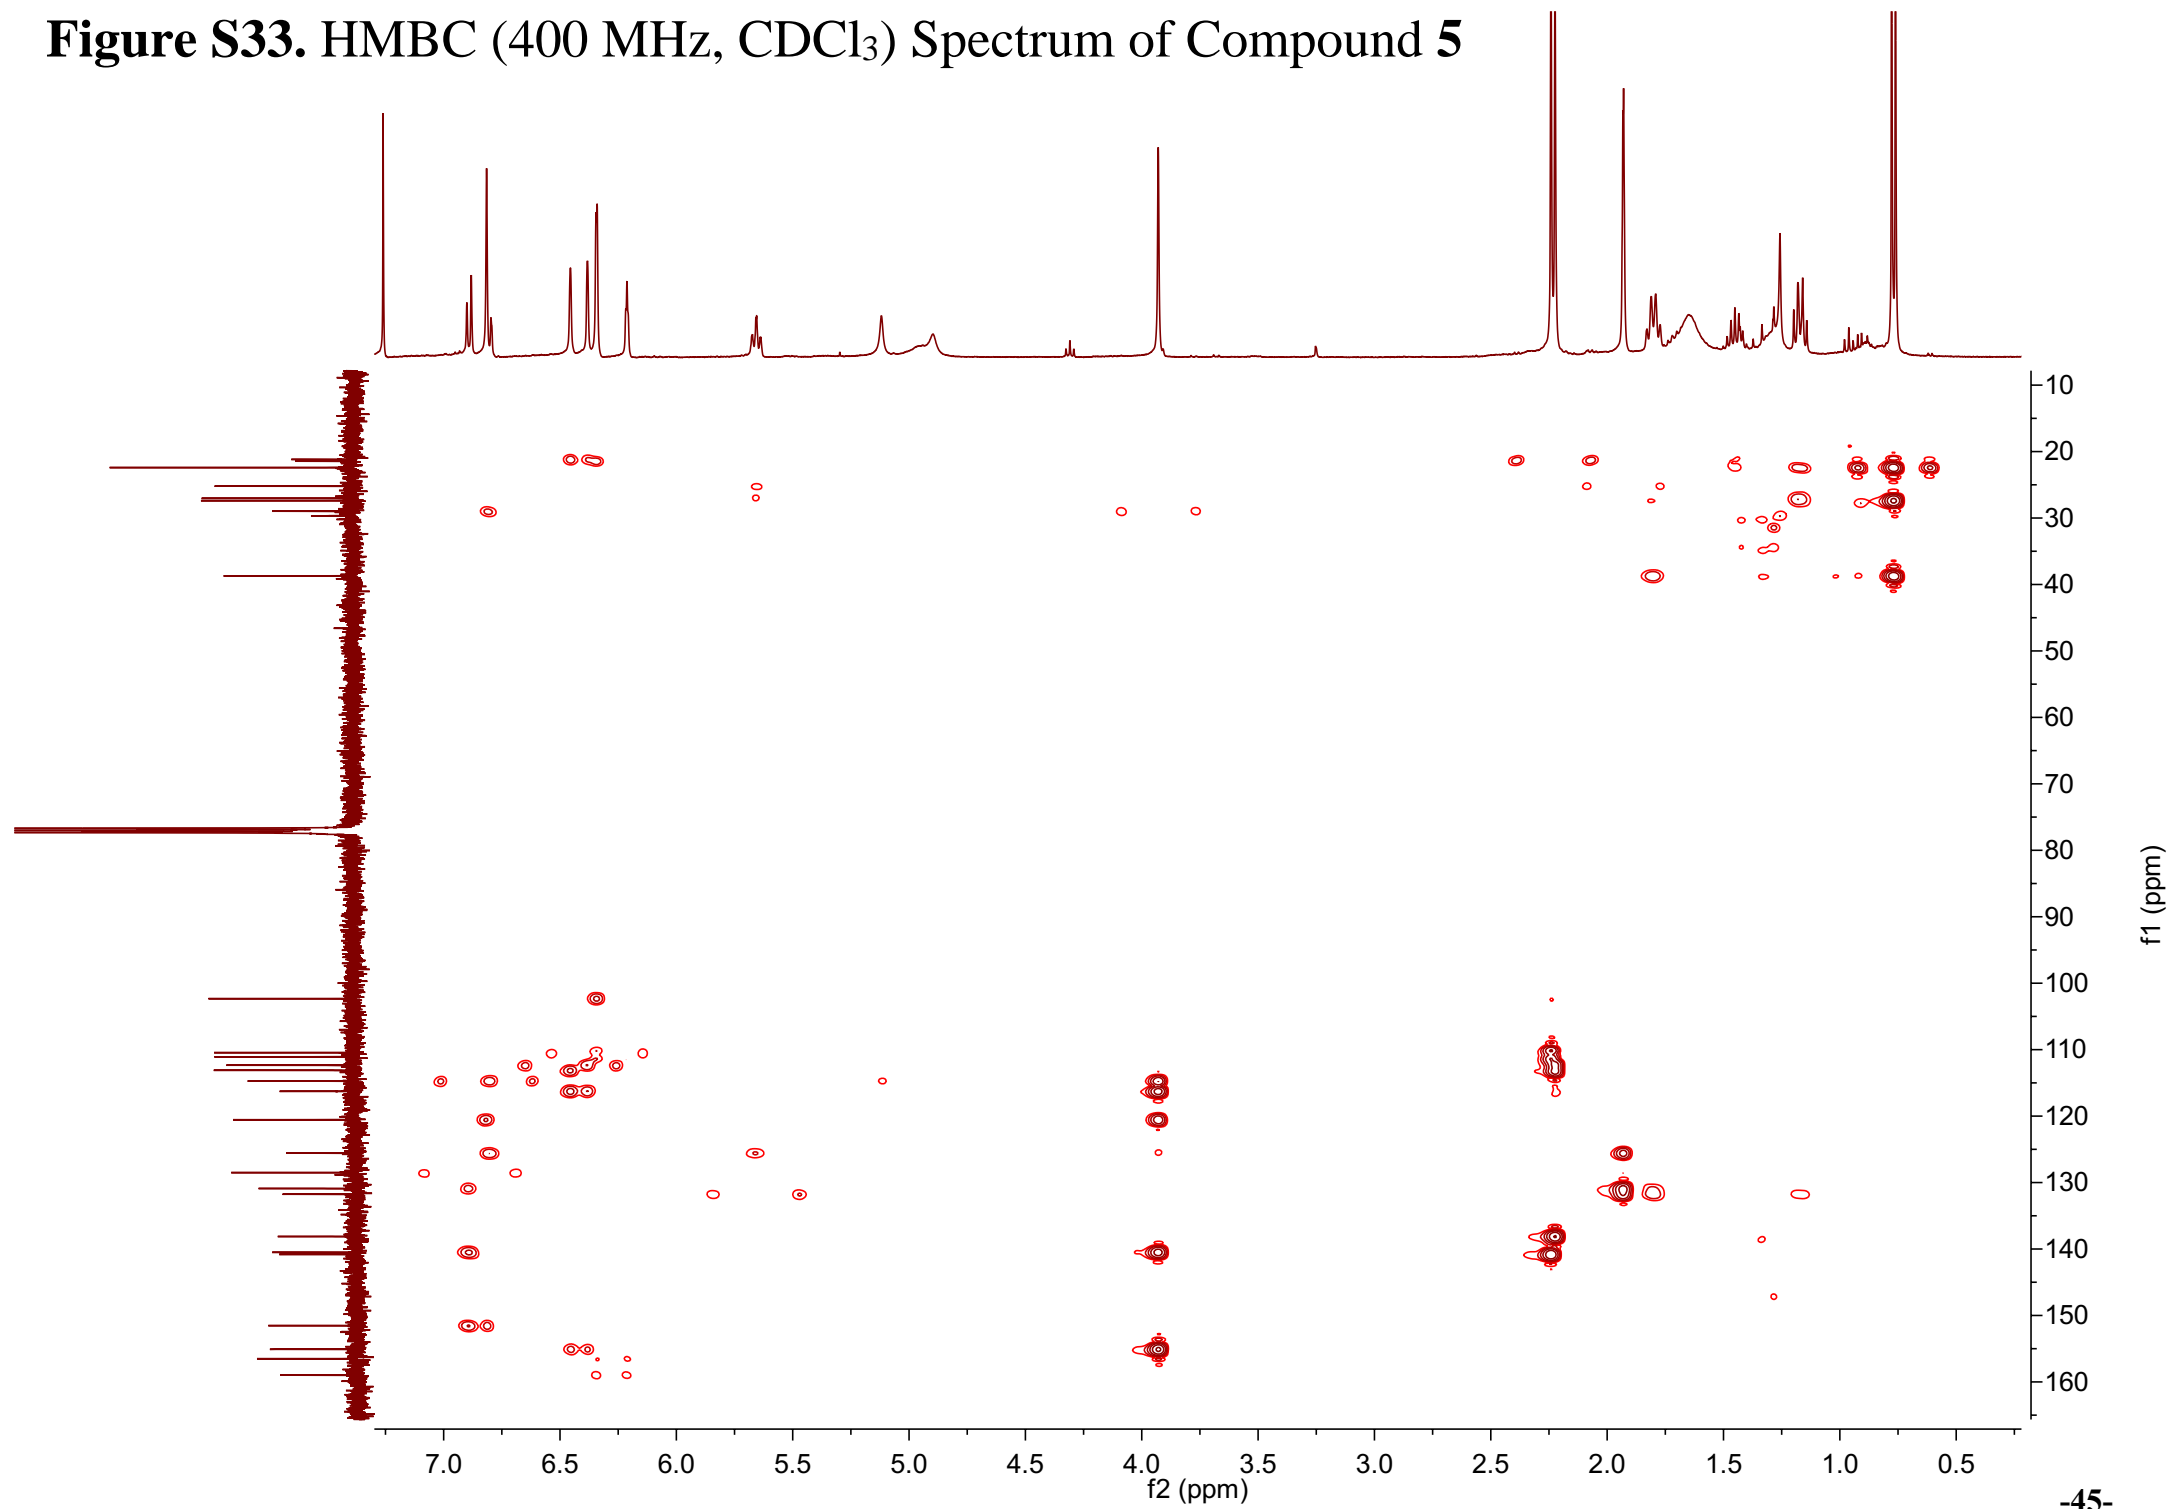

**Figure S34.**  $^1\text{H}$  NMR (400 MHz,  $\text{CDCl}_3$ ) Spectrum of Compound **6**

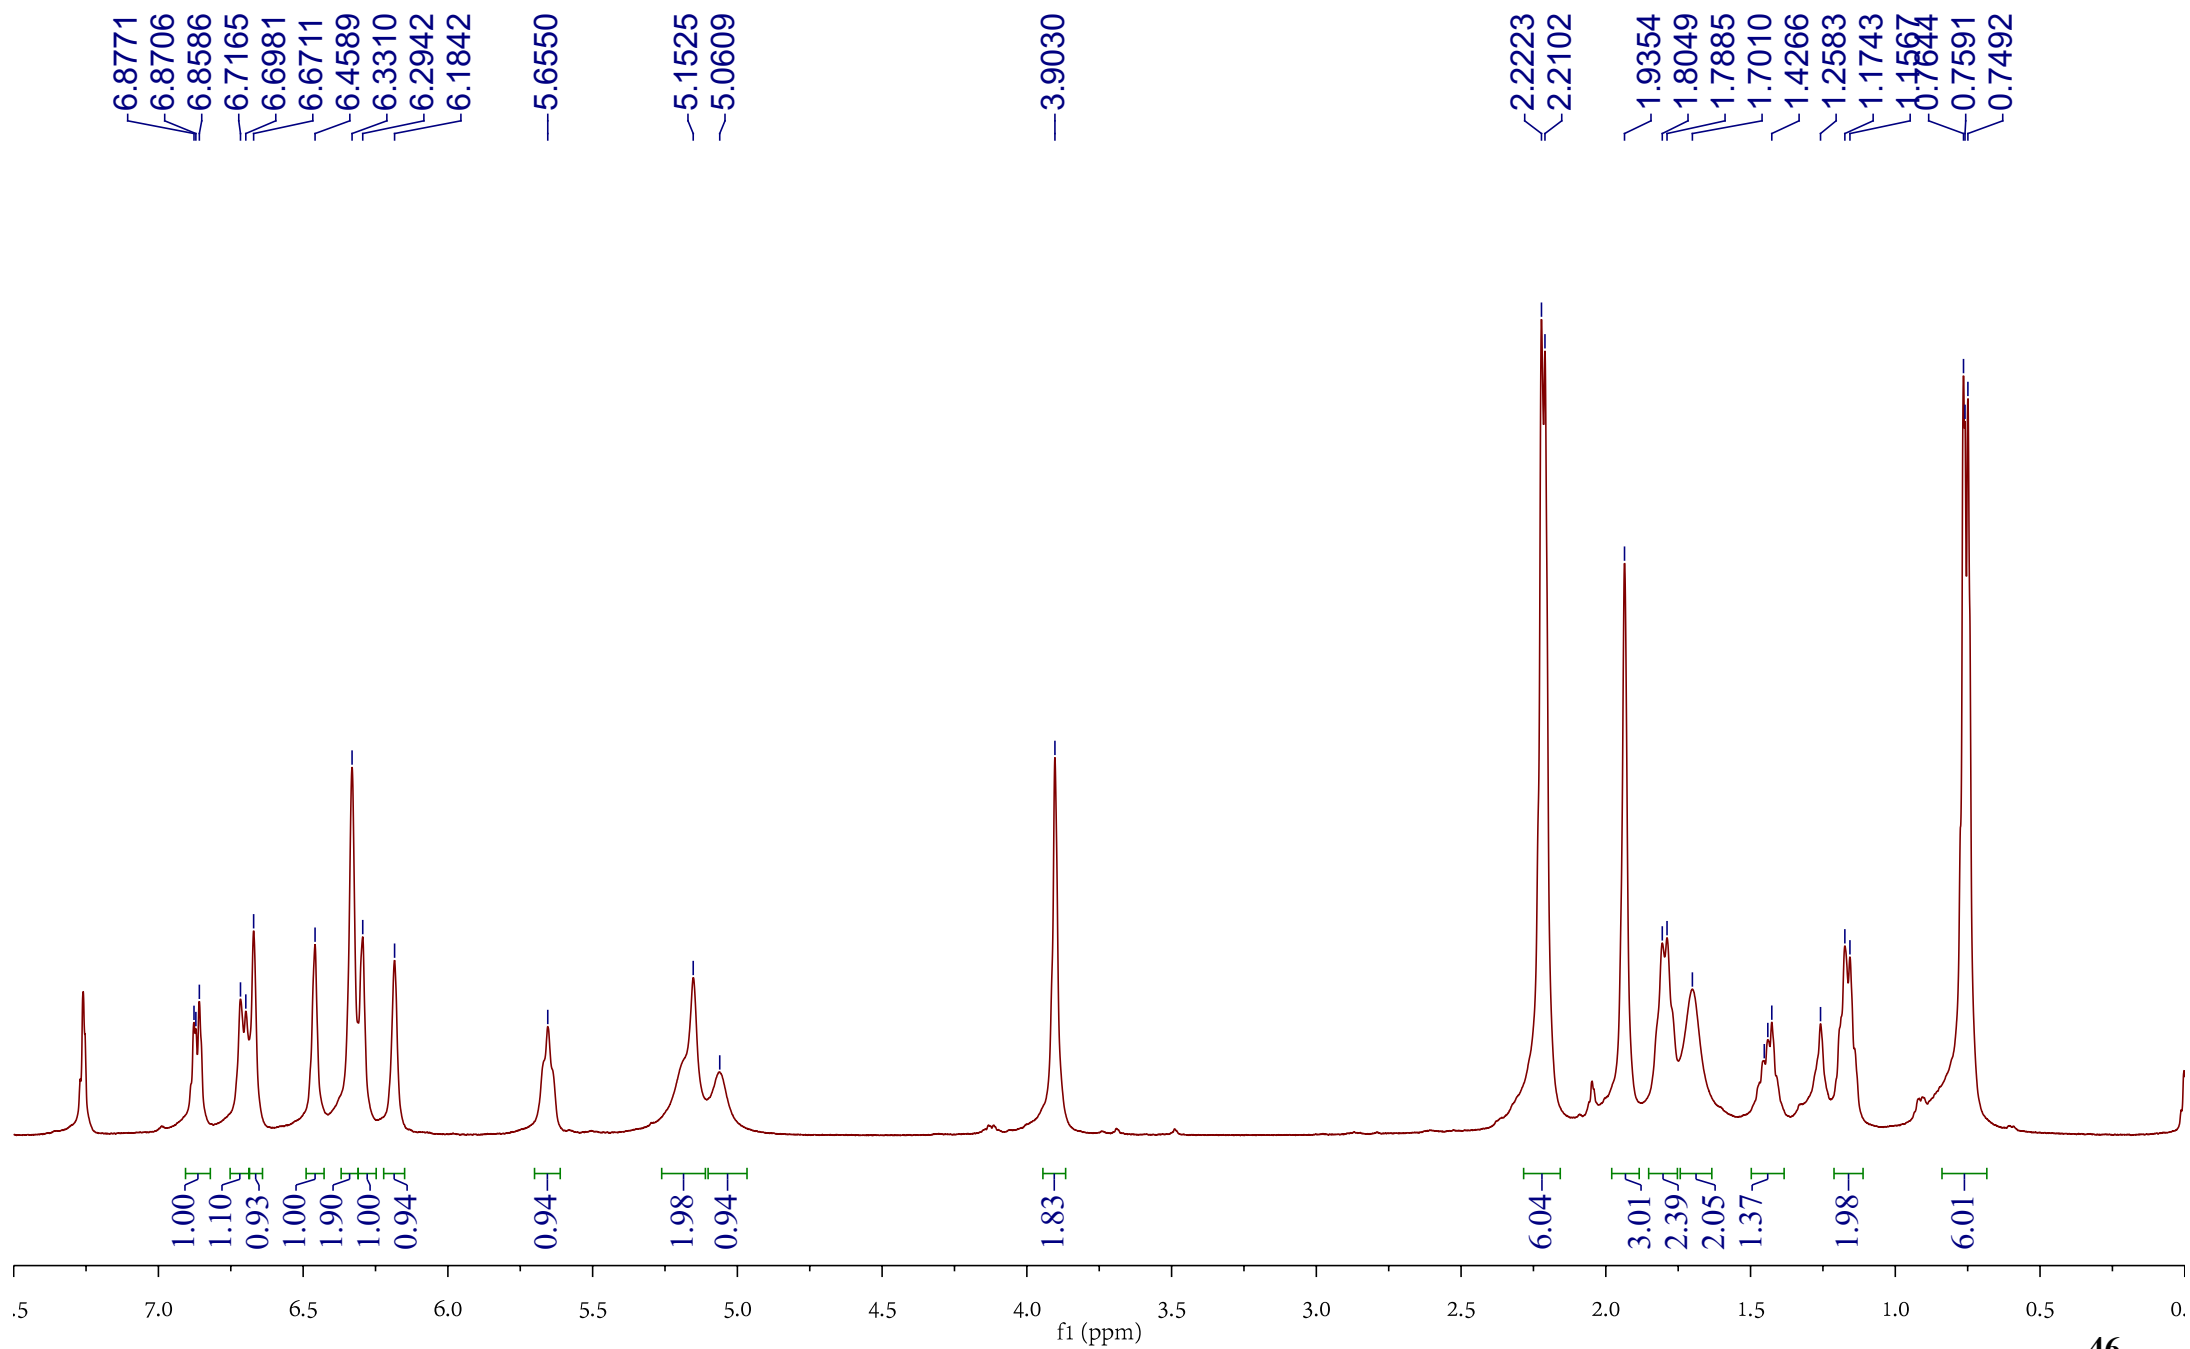

**Figure S35.**  $^{13}\text{C}$  NMR (100 MHz,  $\text{CDCl}_3$ ) Spectrum of Compound **6**

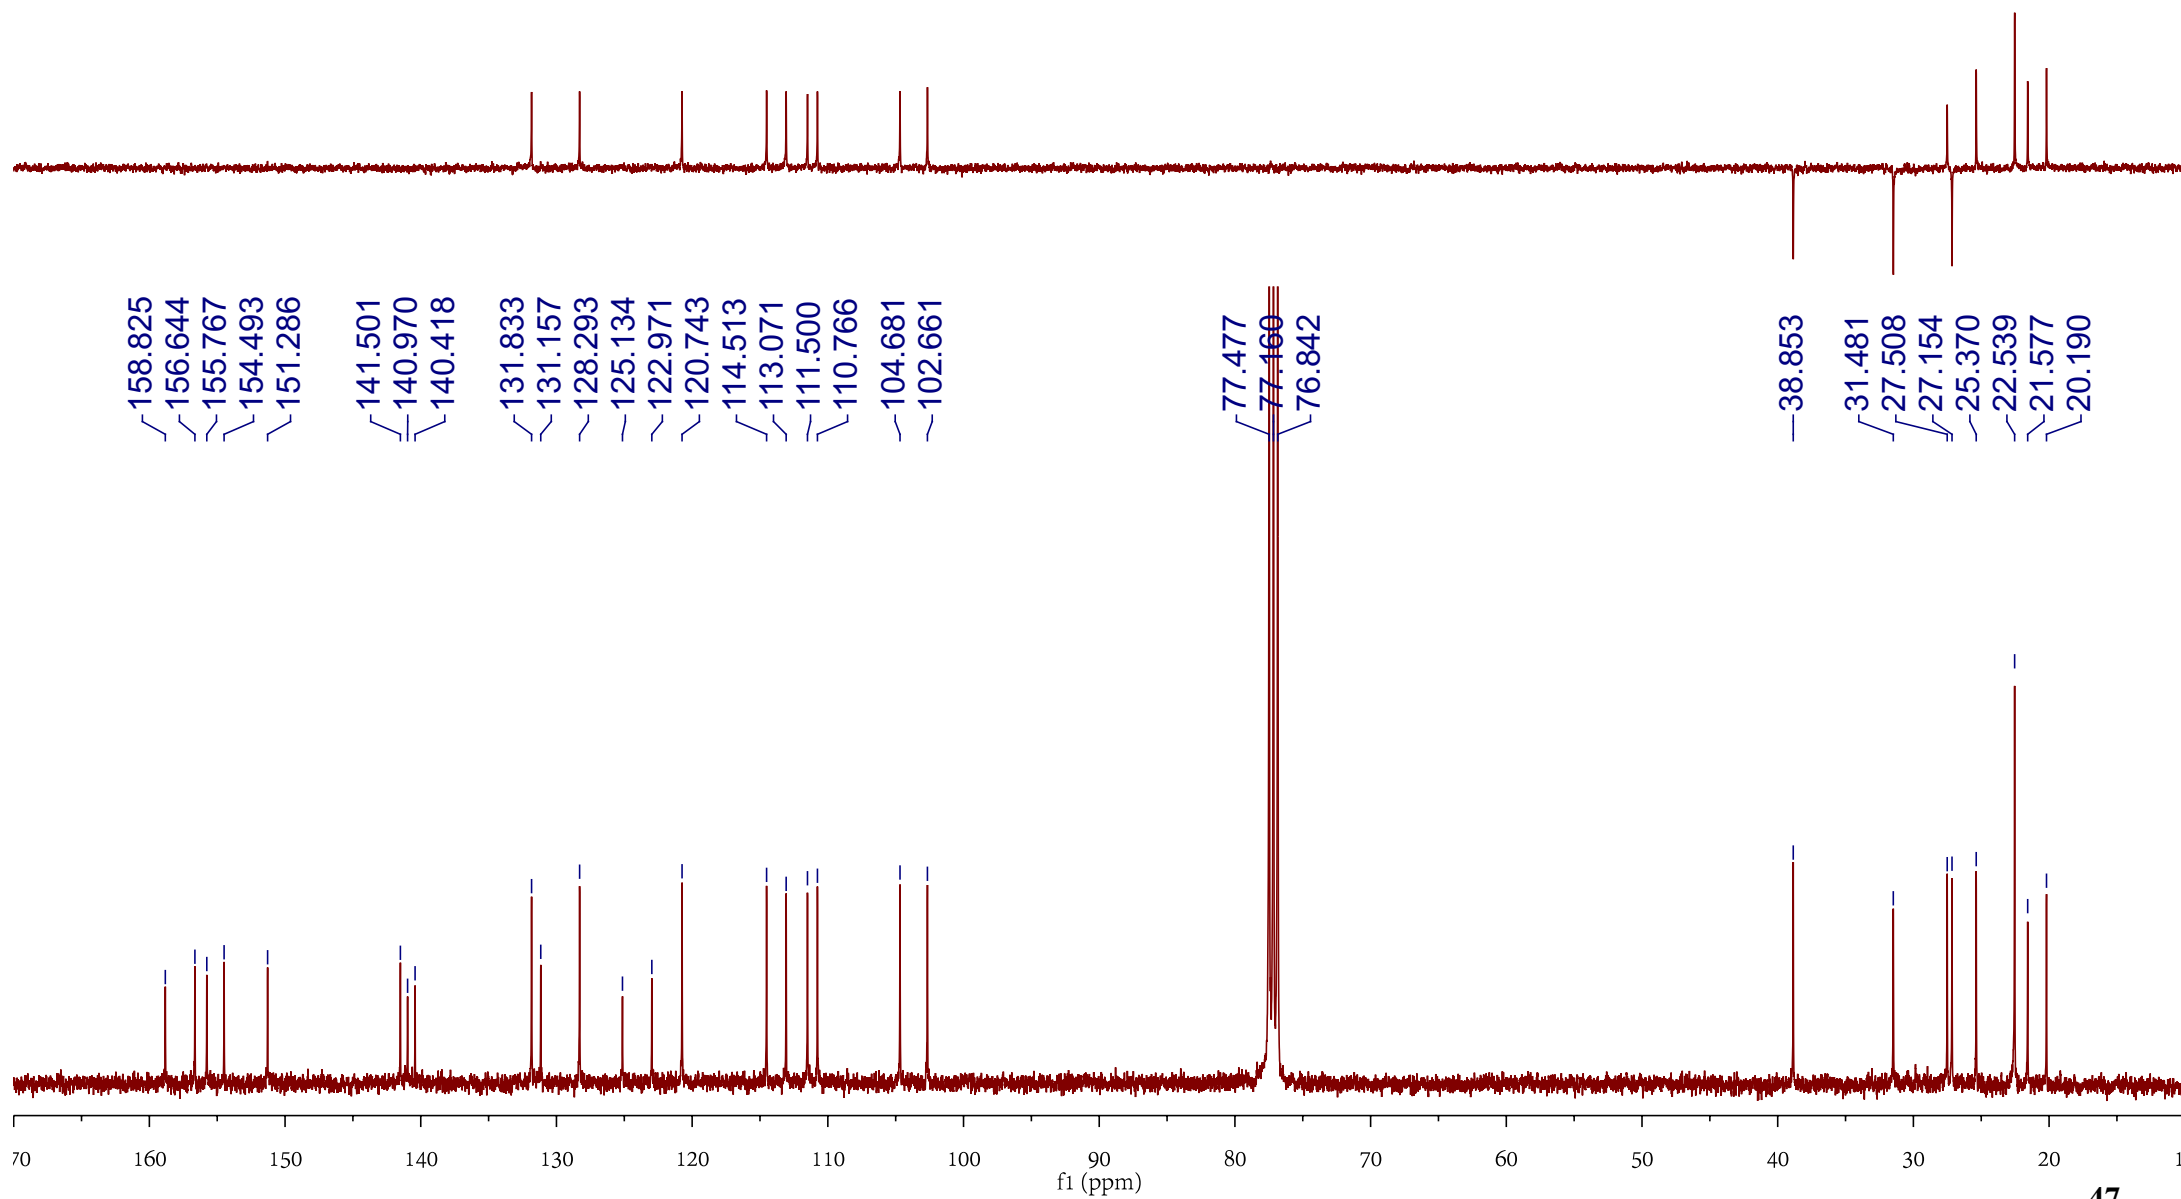

**Figure S36.**  $^1\text{H}$  NMR (400 MHz,  $\text{CDCl}_3$ ) Spectrum of Compound **7**

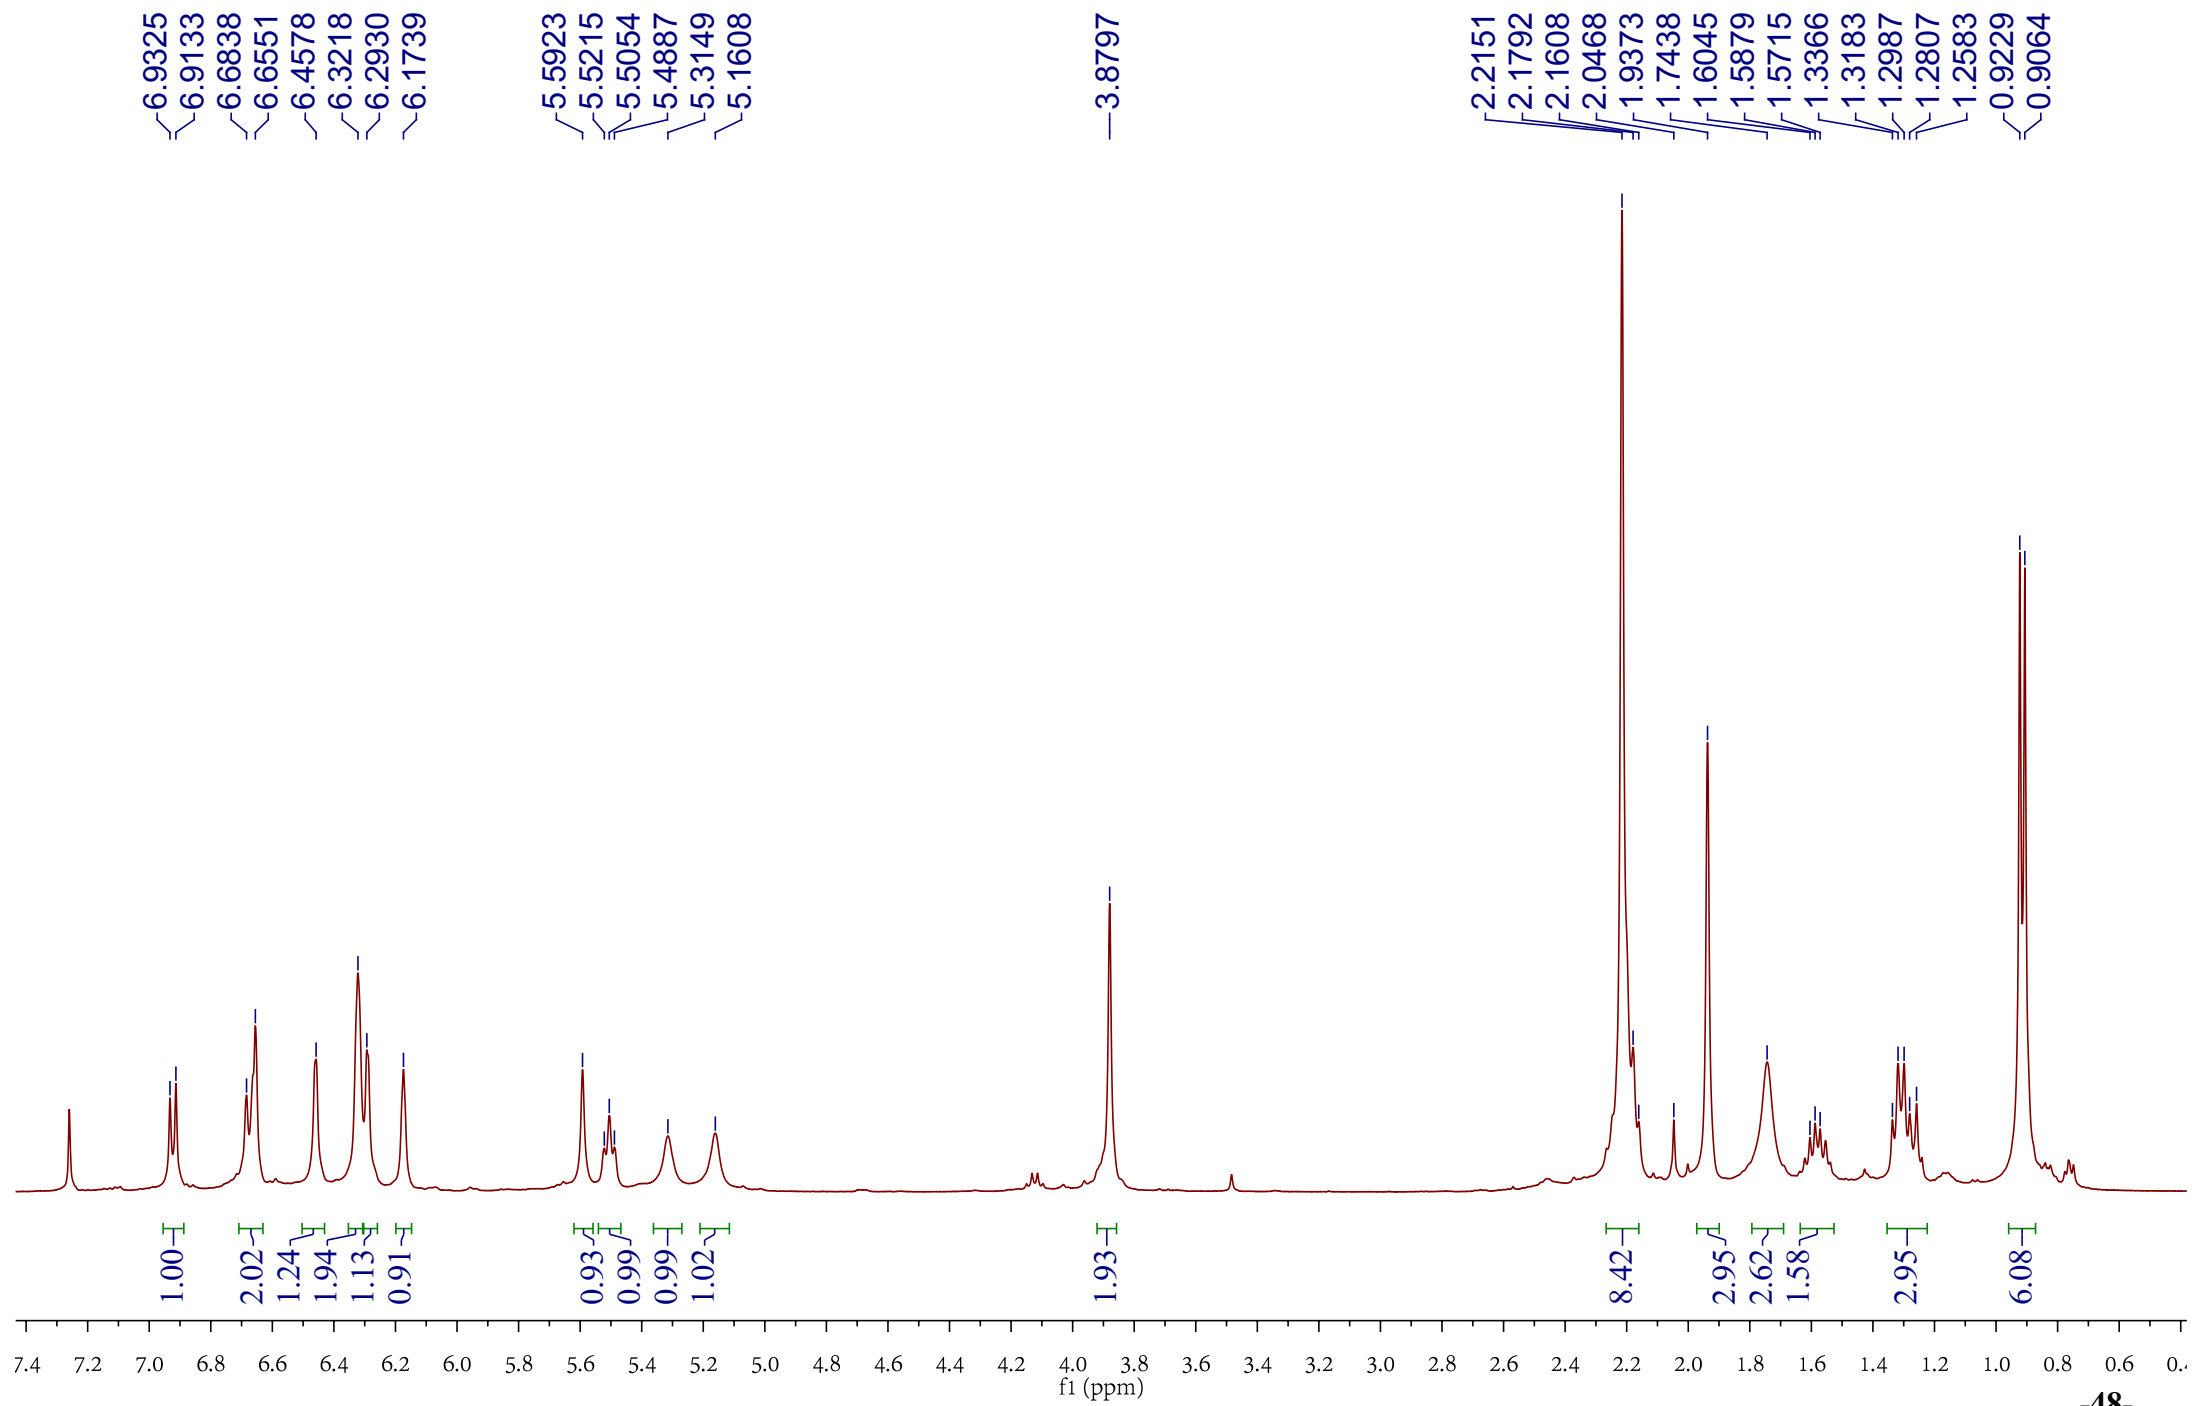

**Figure S37.**  $^{13}\text{C}$  NMR (100 MHz,  $\text{CDCl}_3$ ) Spectrum of Compound **7**

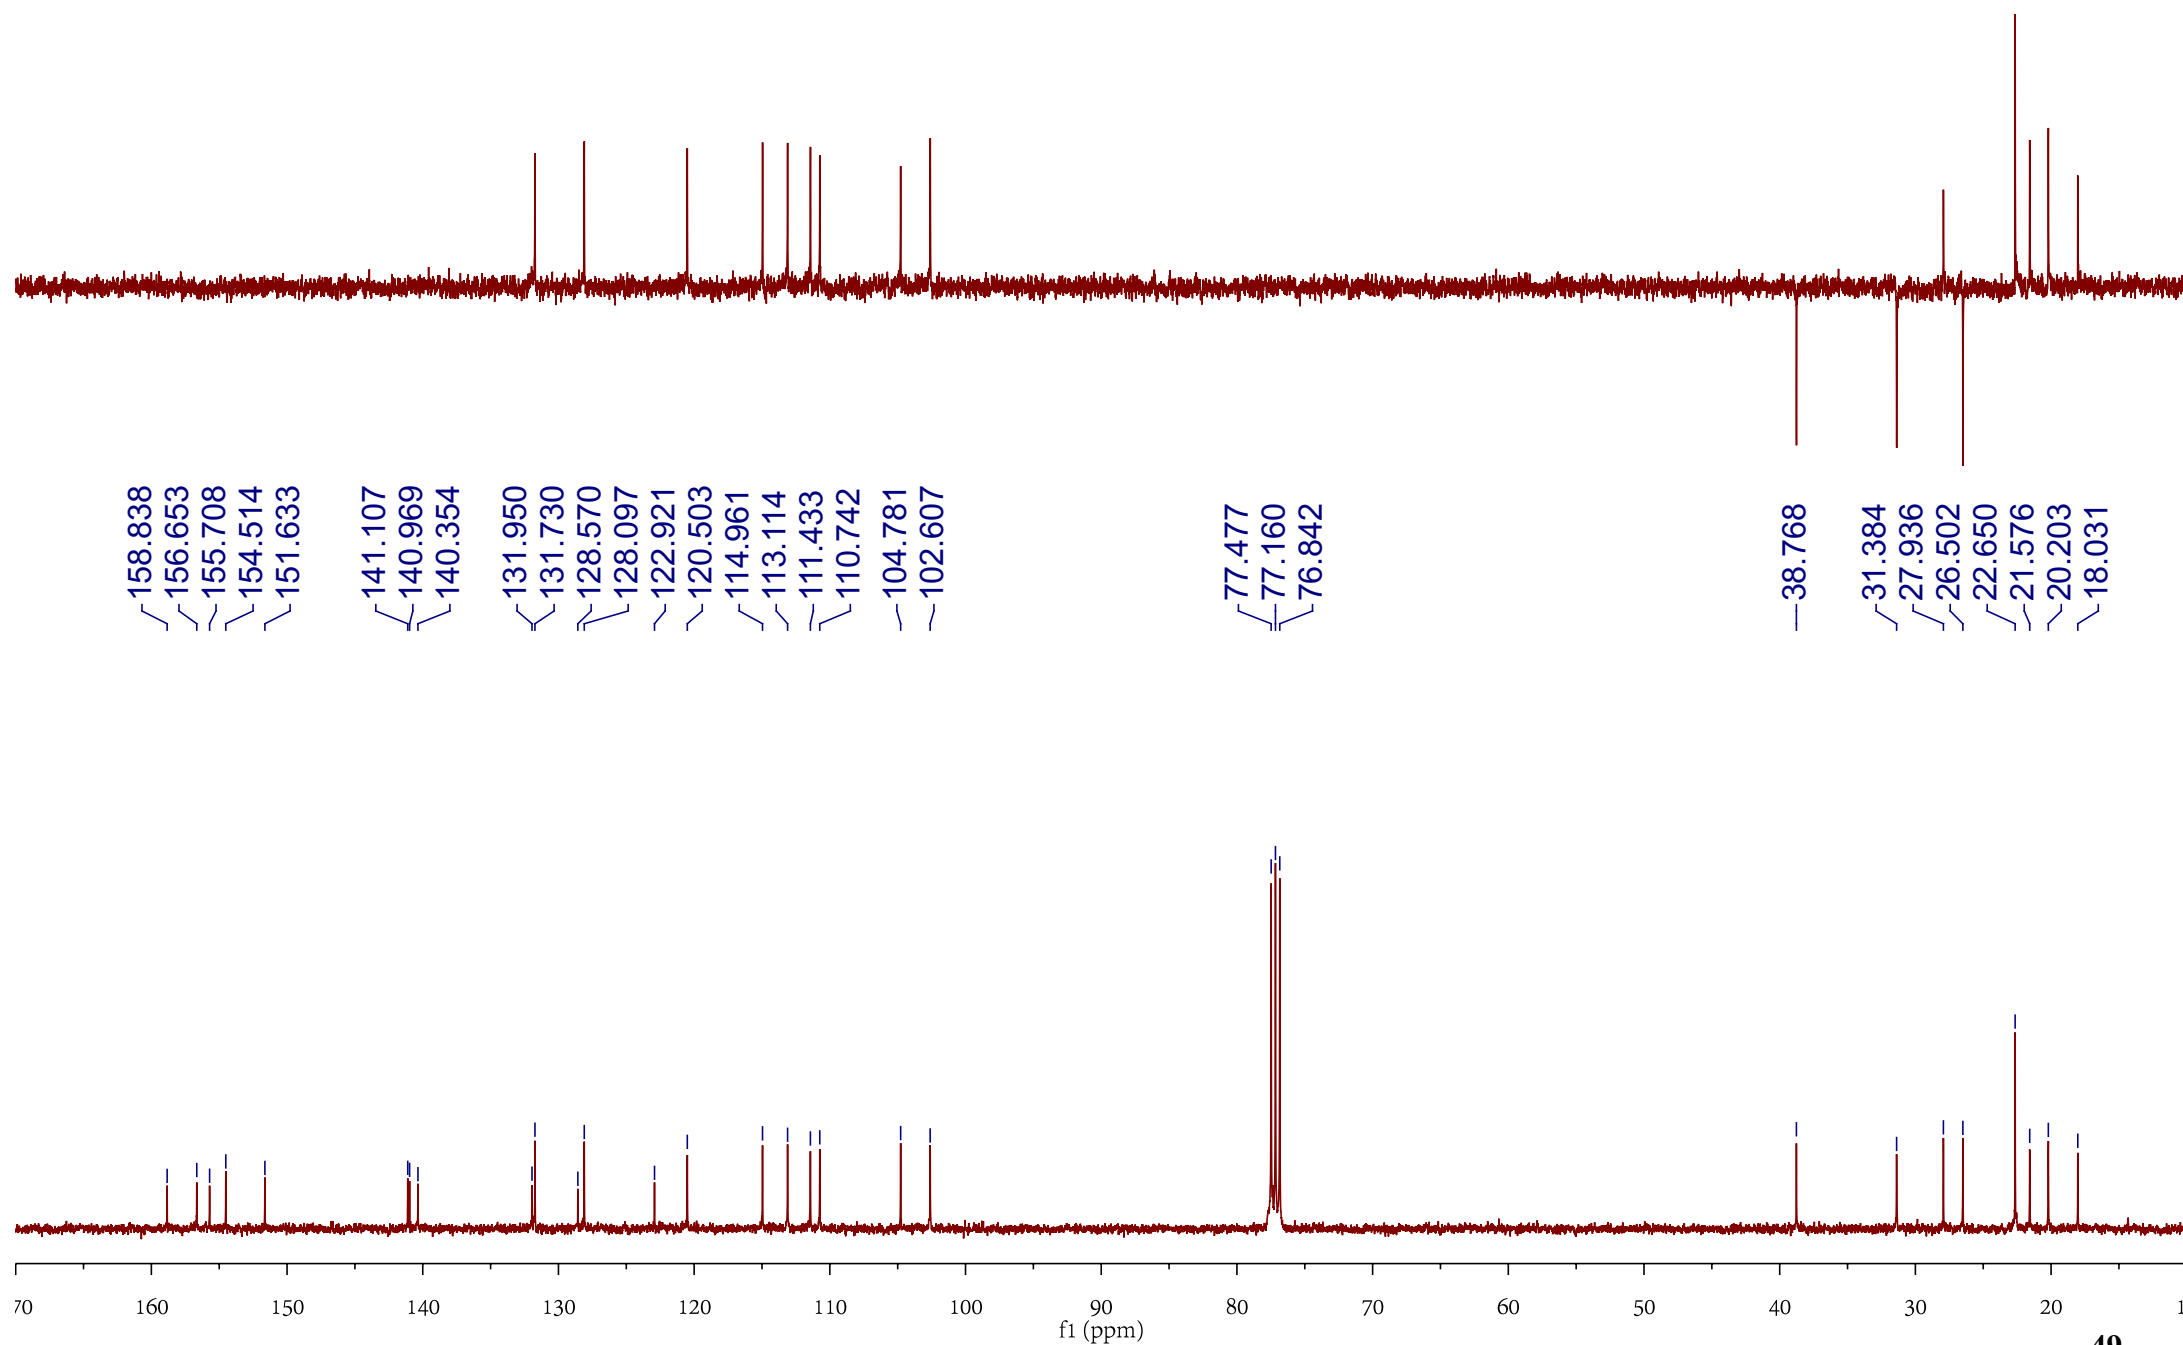

**Figure S38.**  $^1\text{H}$  NMR (400 MHz,  $\text{CDCl}_3$ ) Spectrum of Compound **8**

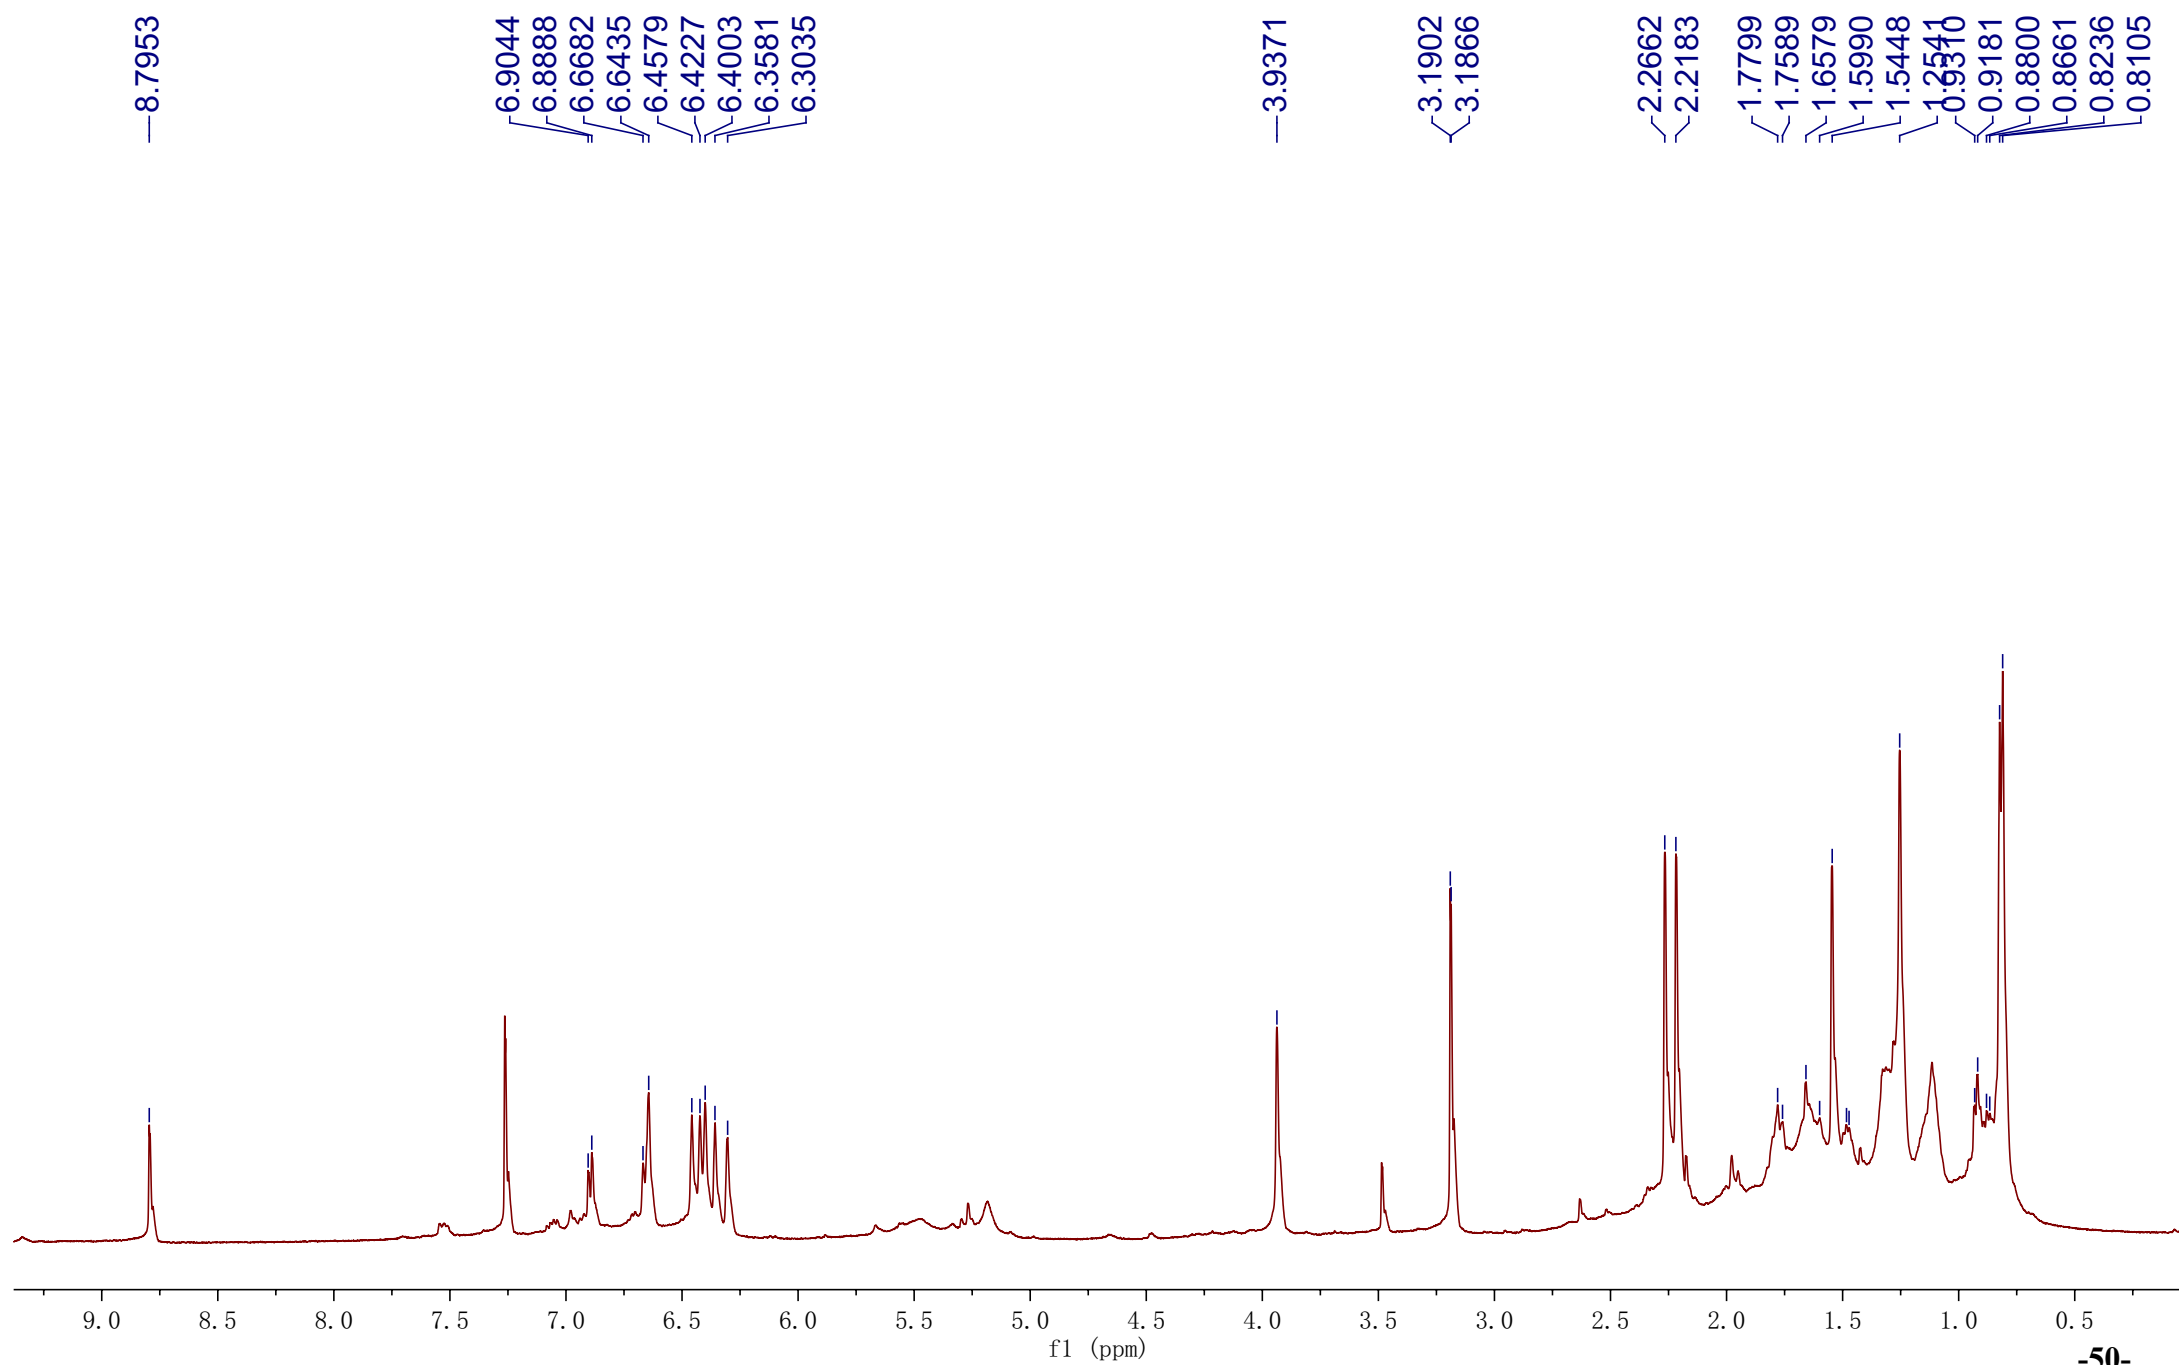

**Figure S39.**  $^{13}\text{C}$  NMR (100 MHz,  $\text{CDCl}_3$ ) Spectrum of Compound **8**

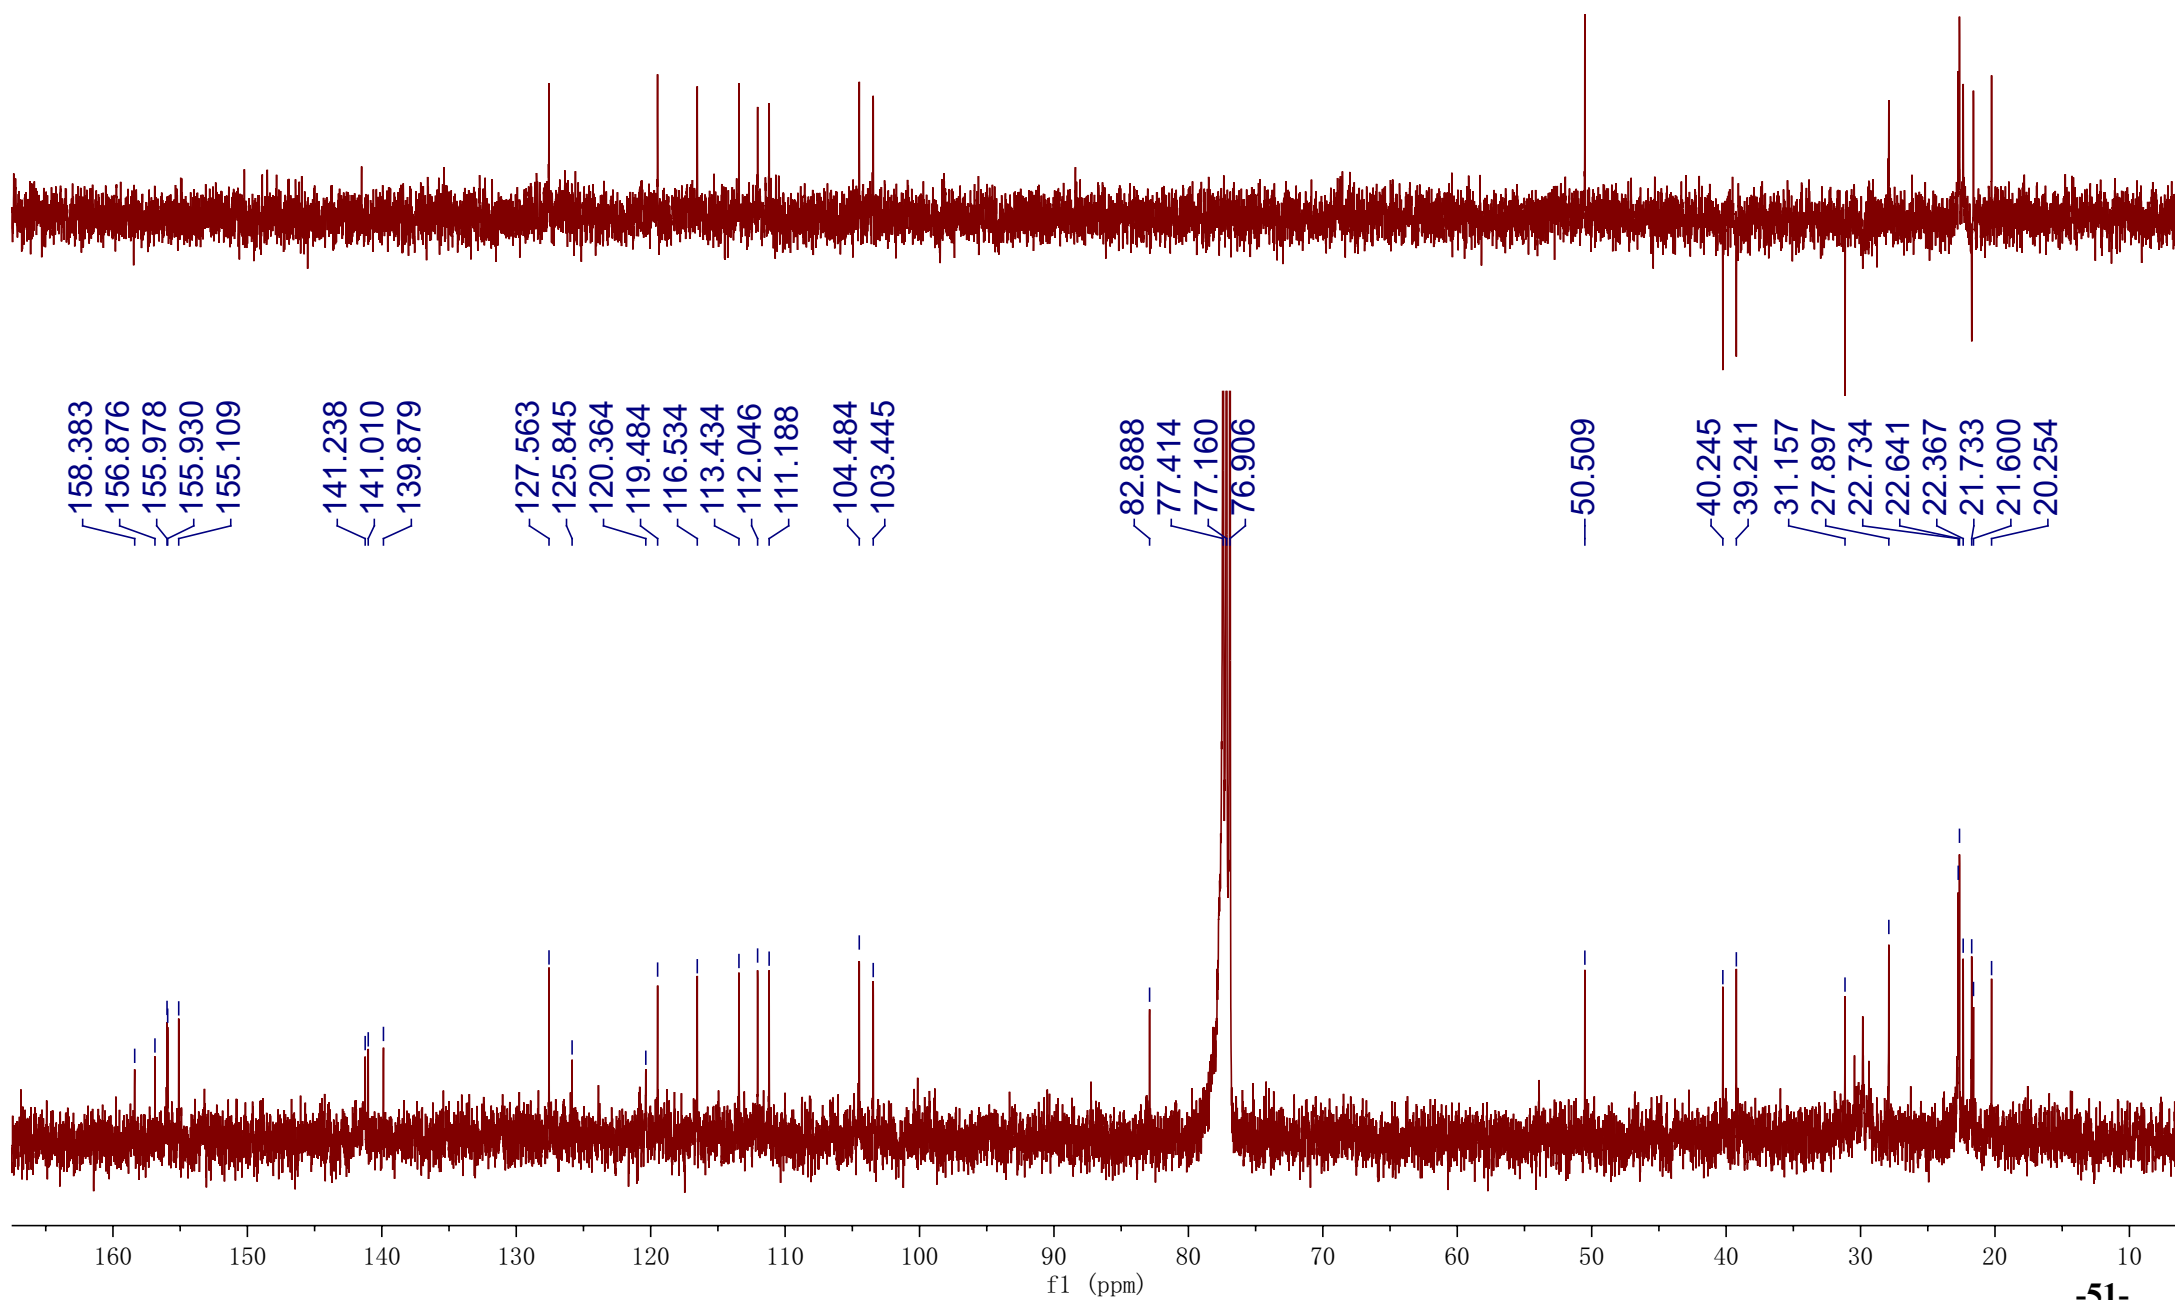

**Figure S40.** HSQC (400 MHz, CDCl<sub>3</sub>) Spectrum of Compound **8**

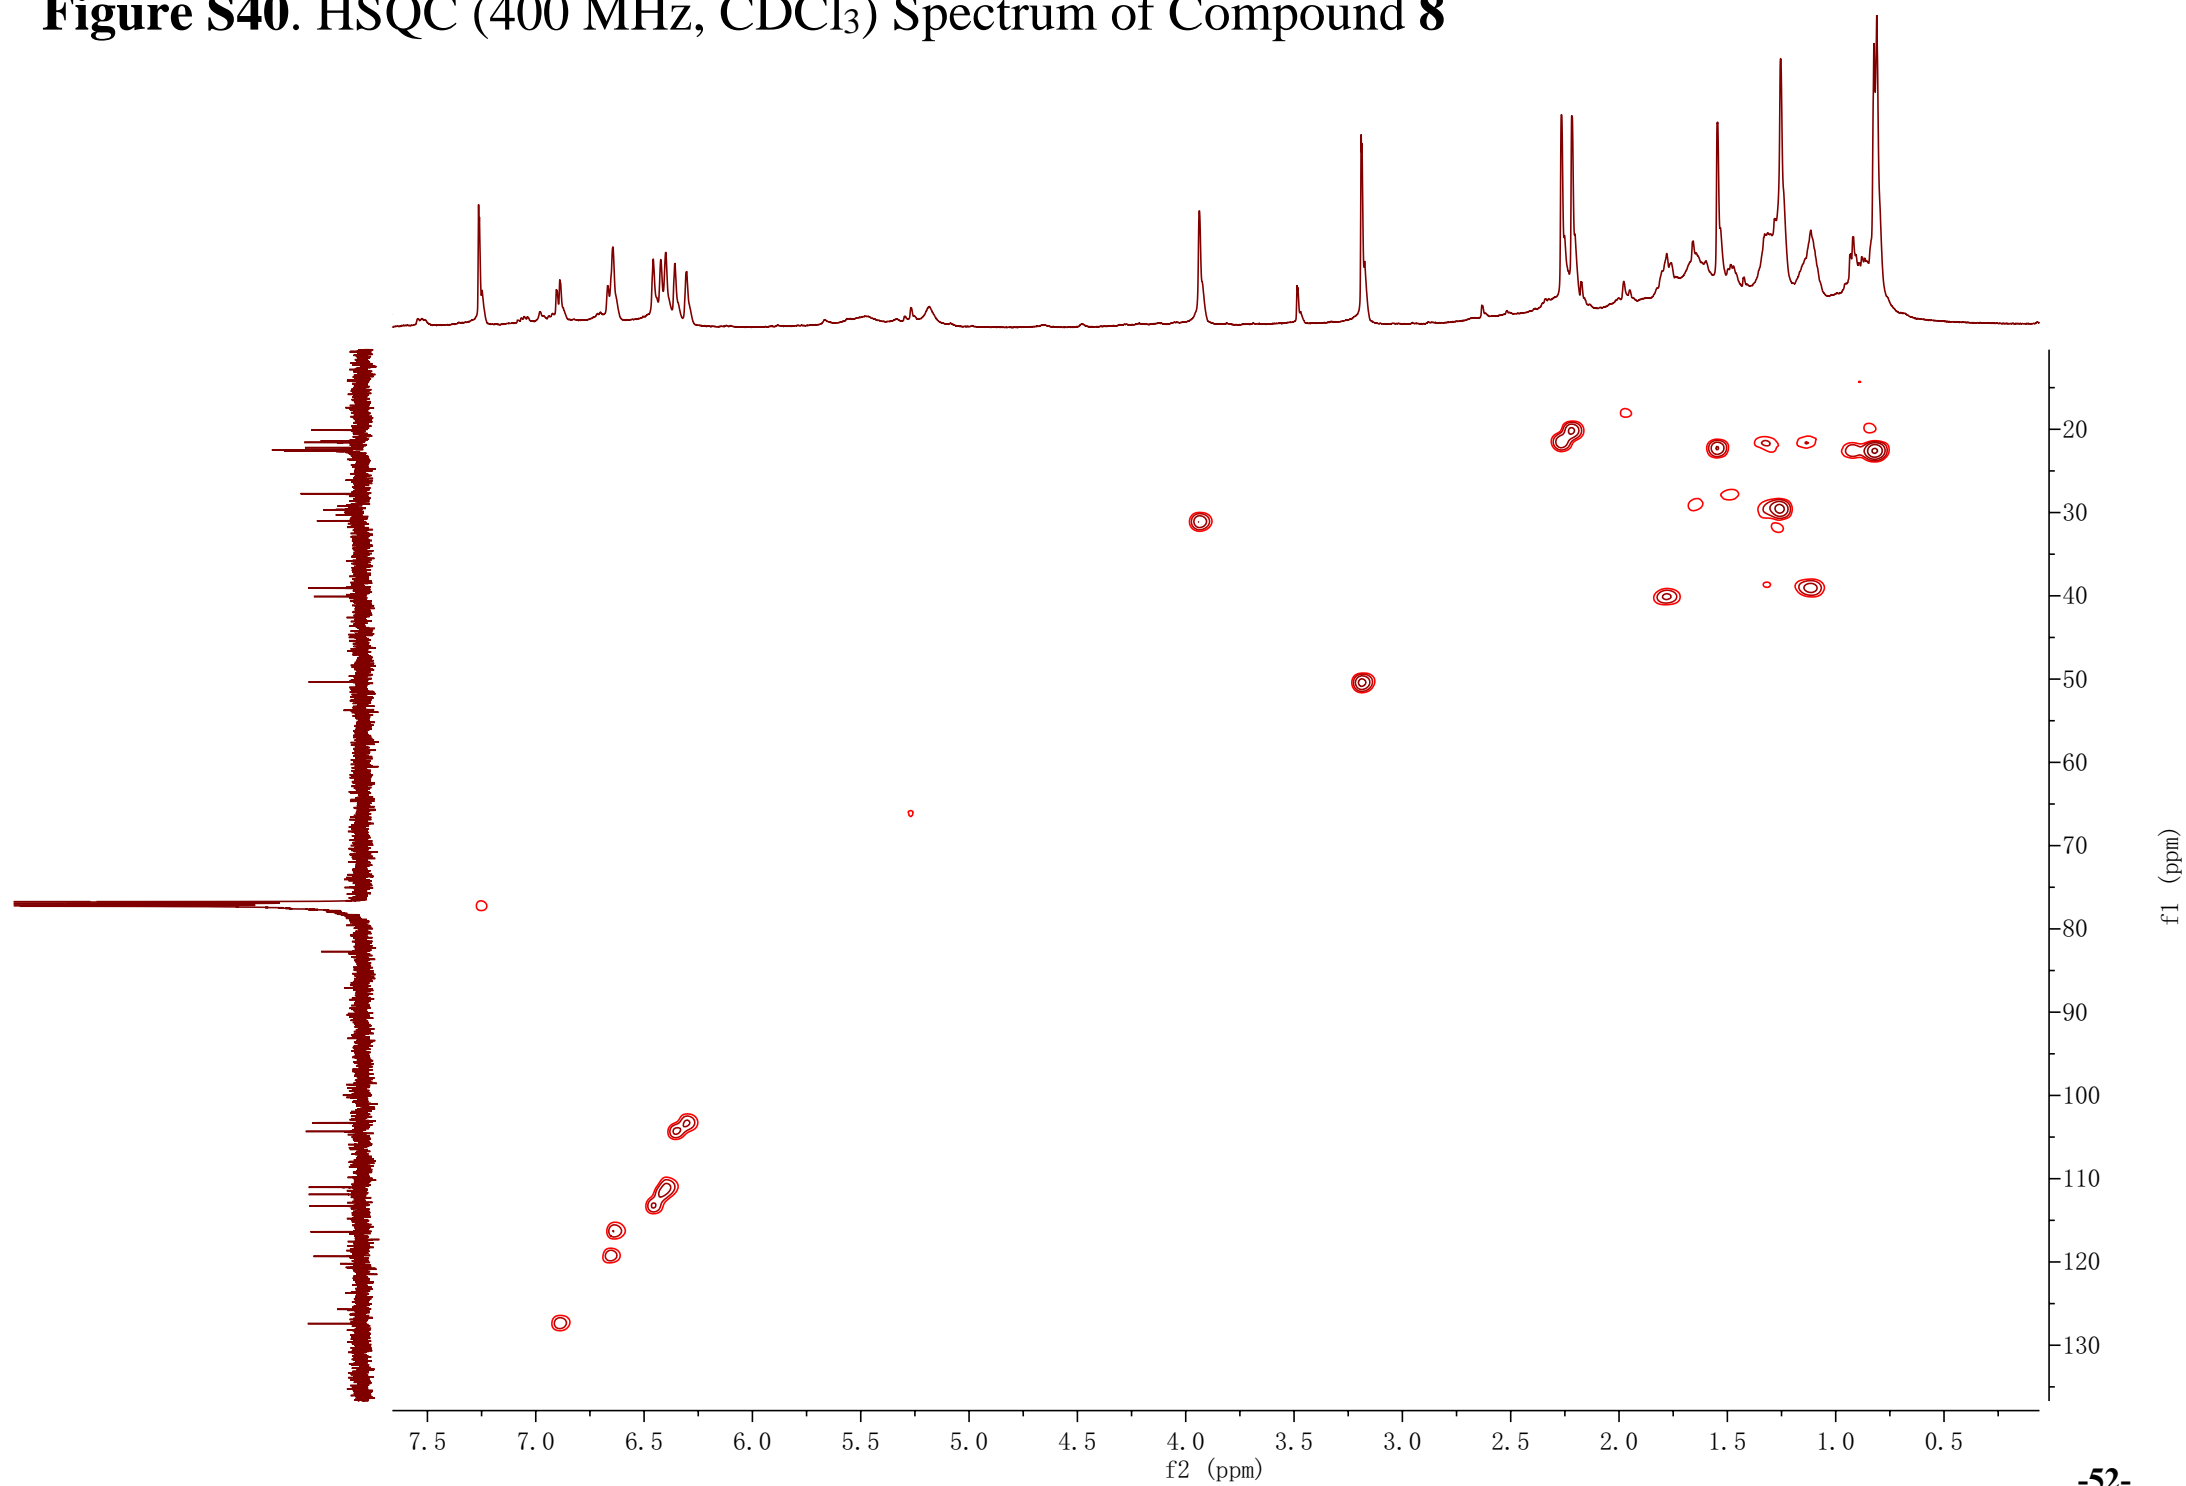



**Figure S41.**  $^1\text{H}$ - $^1\text{H}$  COSY (400 MHz,  $\text{CDCl}_3$ ) Spectrum of Compound **8**

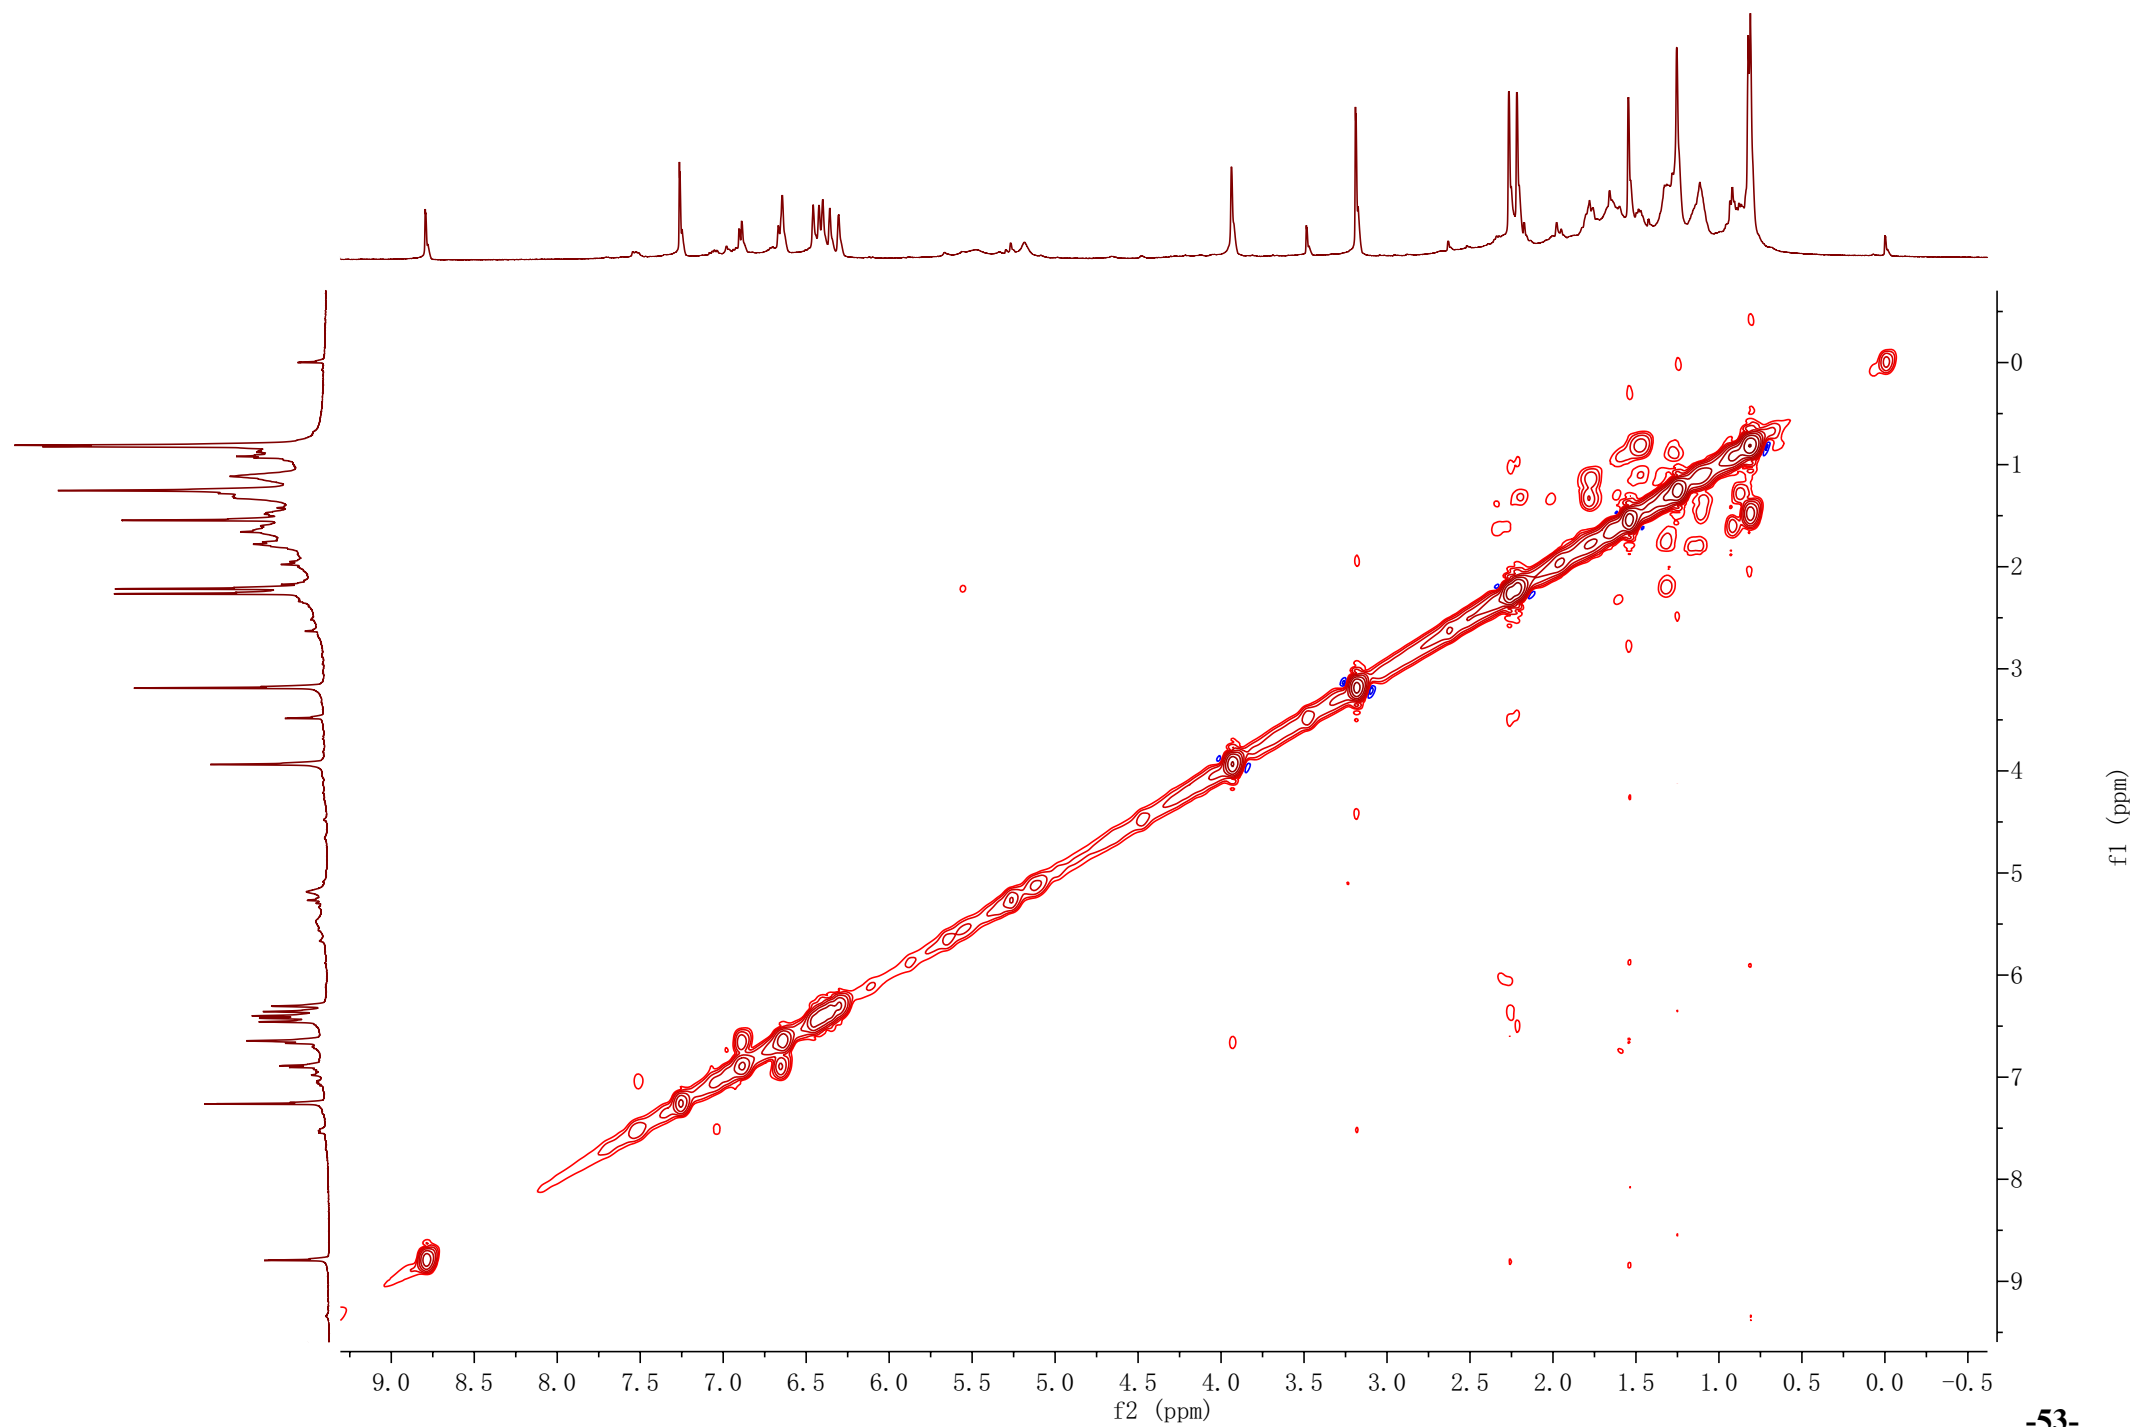

**Figure S42.** HMBC (400 MHz, CDCl<sub>3</sub>) Spectrum of Compound **8**

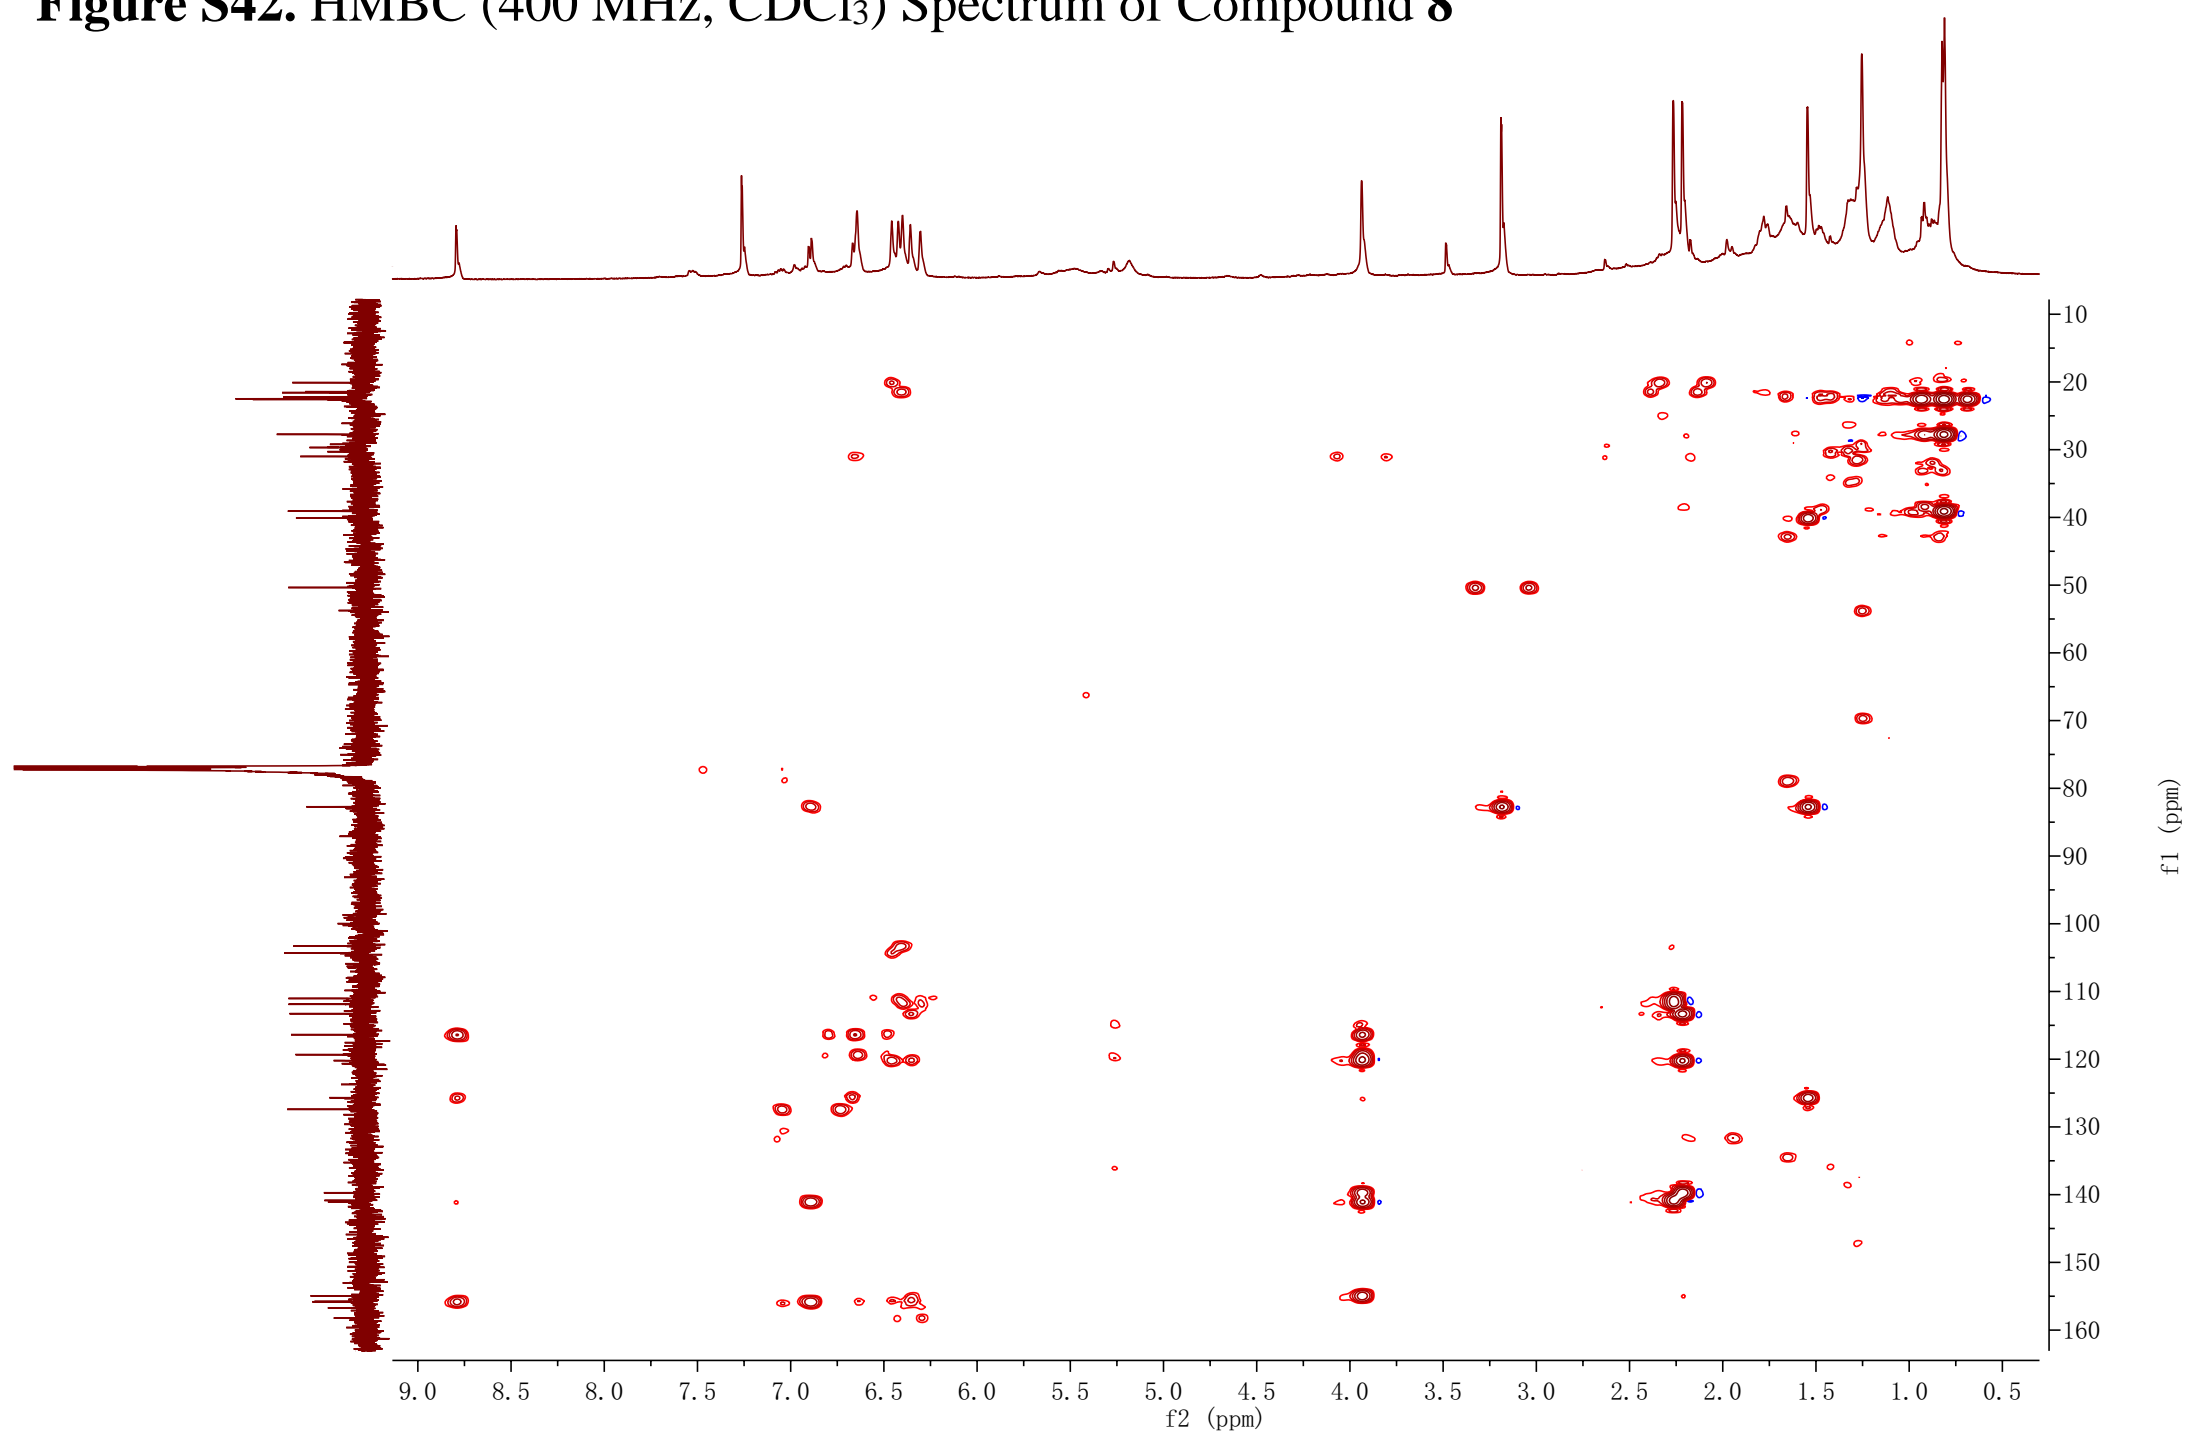

**Figure S43.**  $^1\text{H}$  NMR (500MHz,  $\text{CDCl}_3$ ) Spectrum of Compound **9**

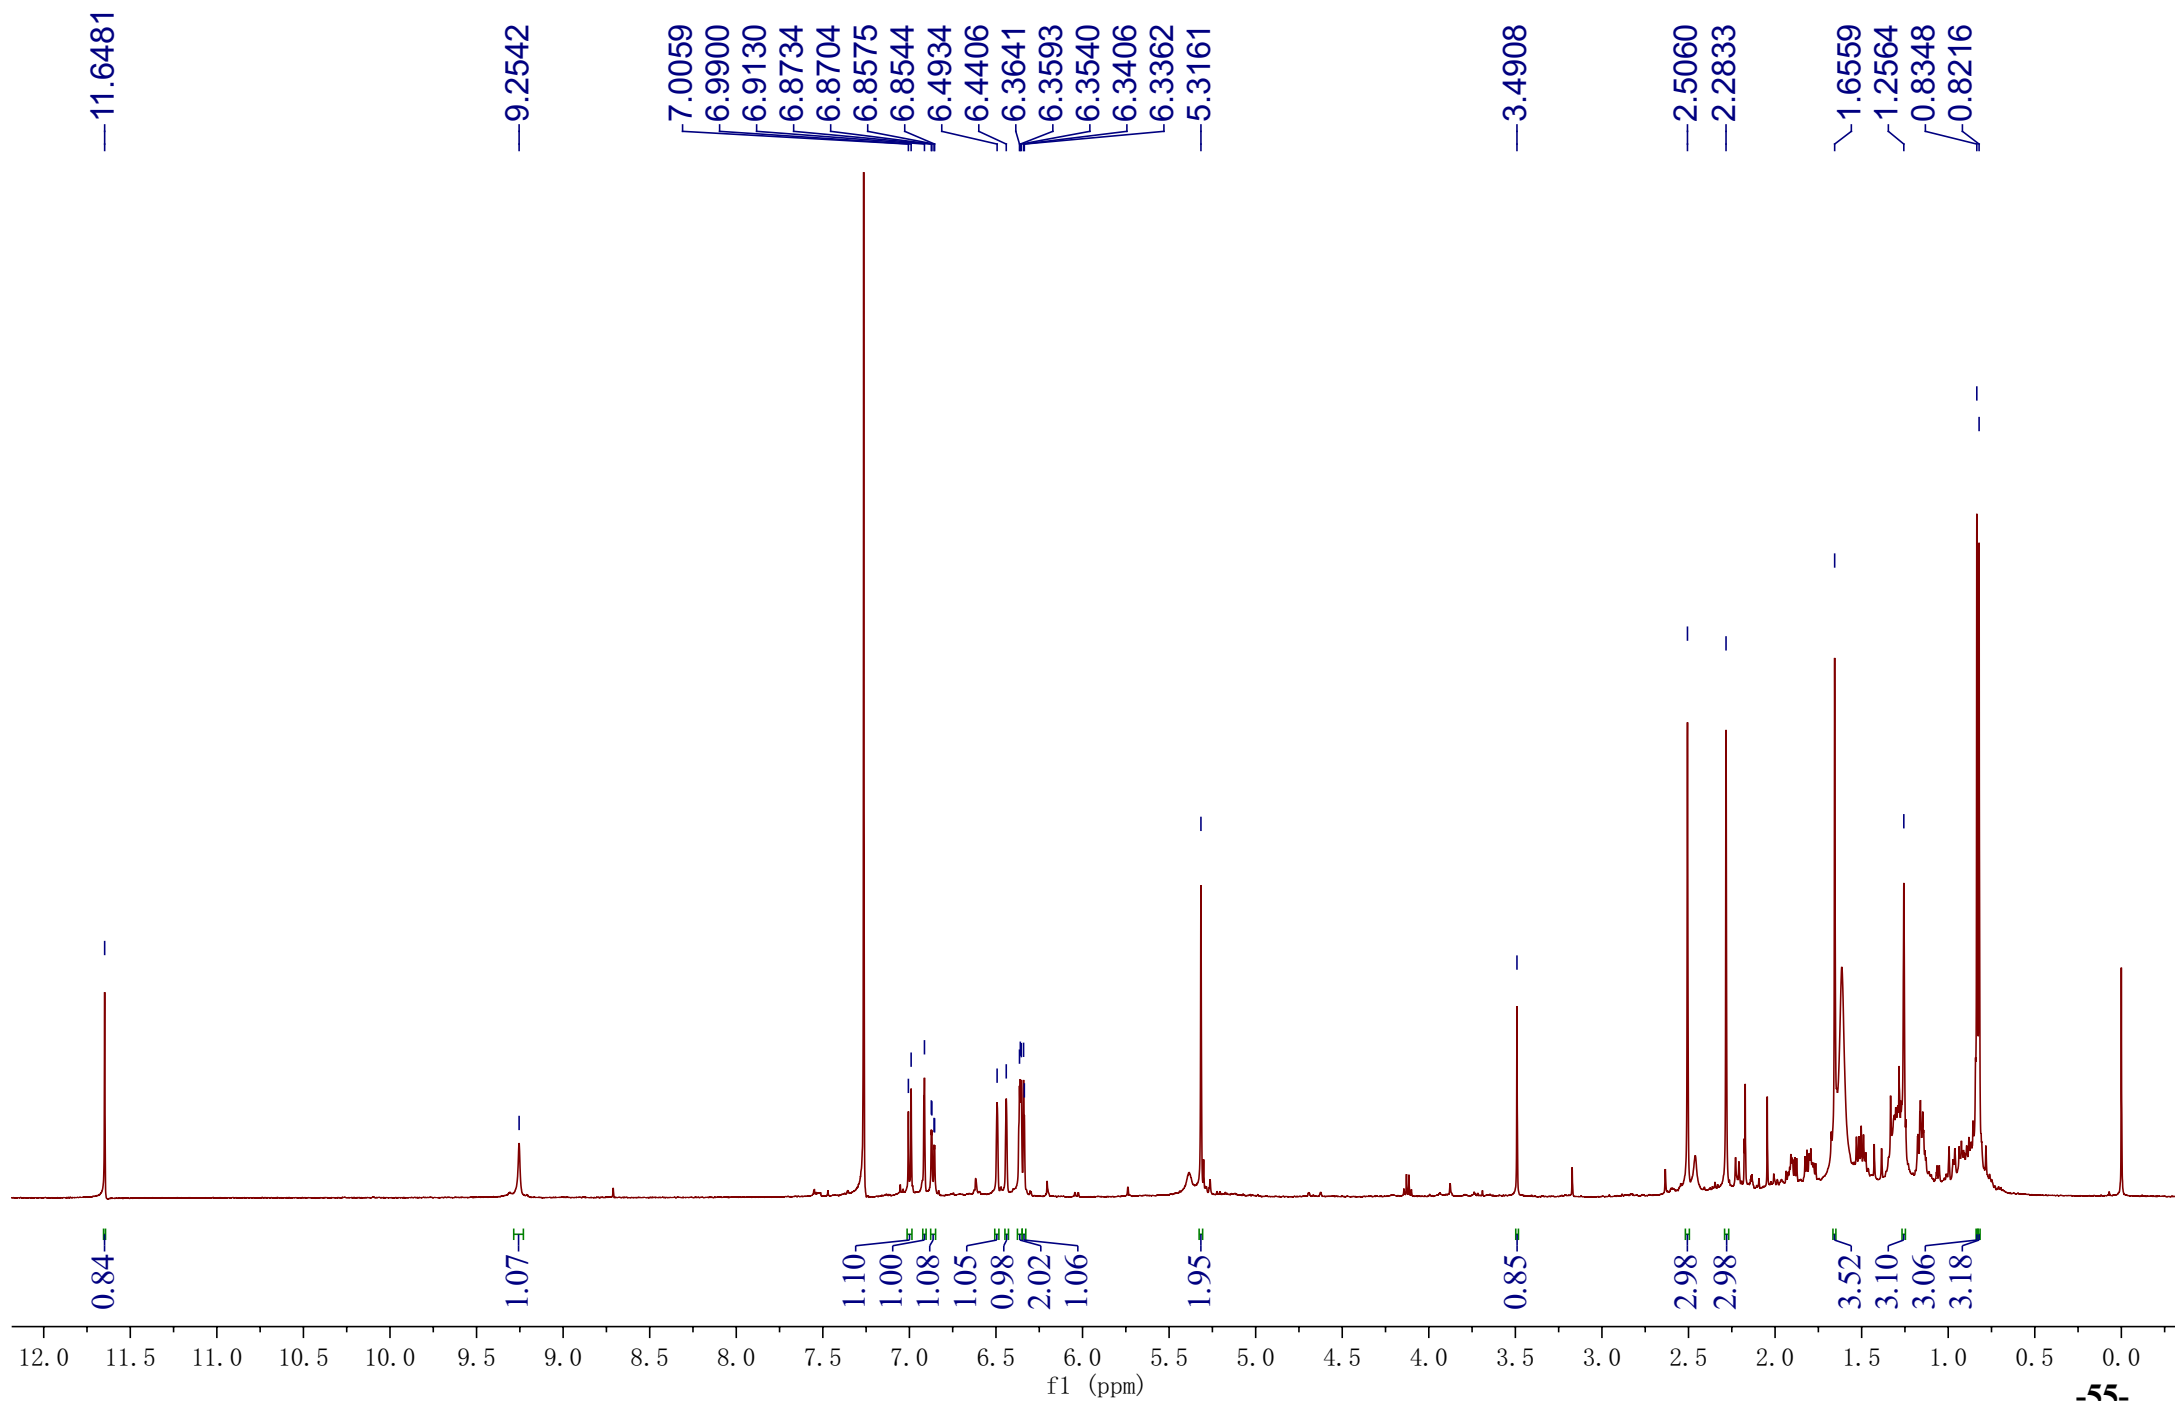

**Figure S44.**  $^{13}\text{C}$  NMR (125 MHz,  $\text{CDCl}_3$ ) Spectrum of Compound **9**

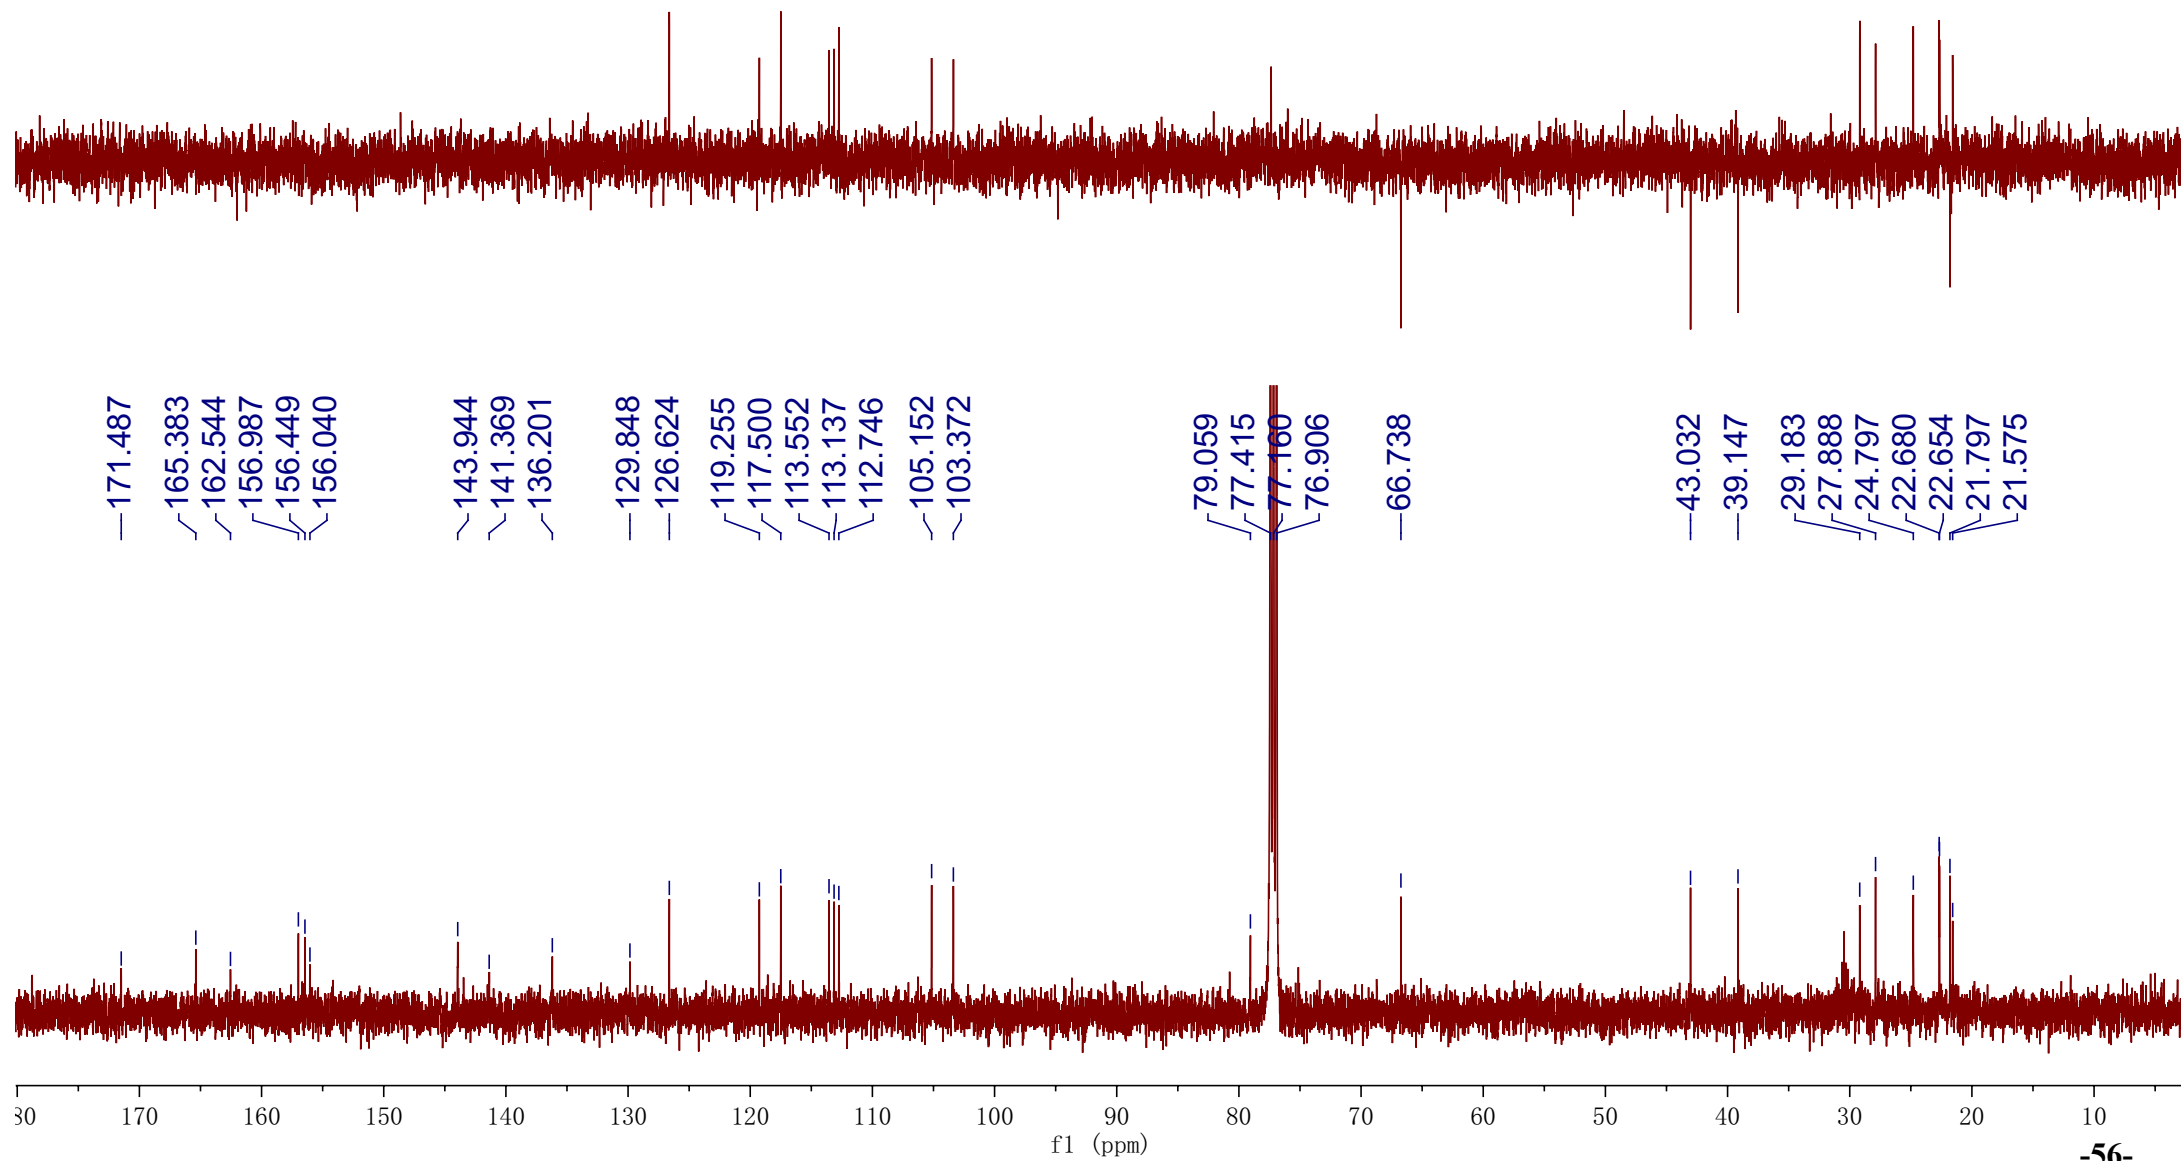

**FigureS45.**  $^1\text{H}$  NMR (400 MHz,  $\text{CDCl}_3$ ) Spectrum of Compound **10**

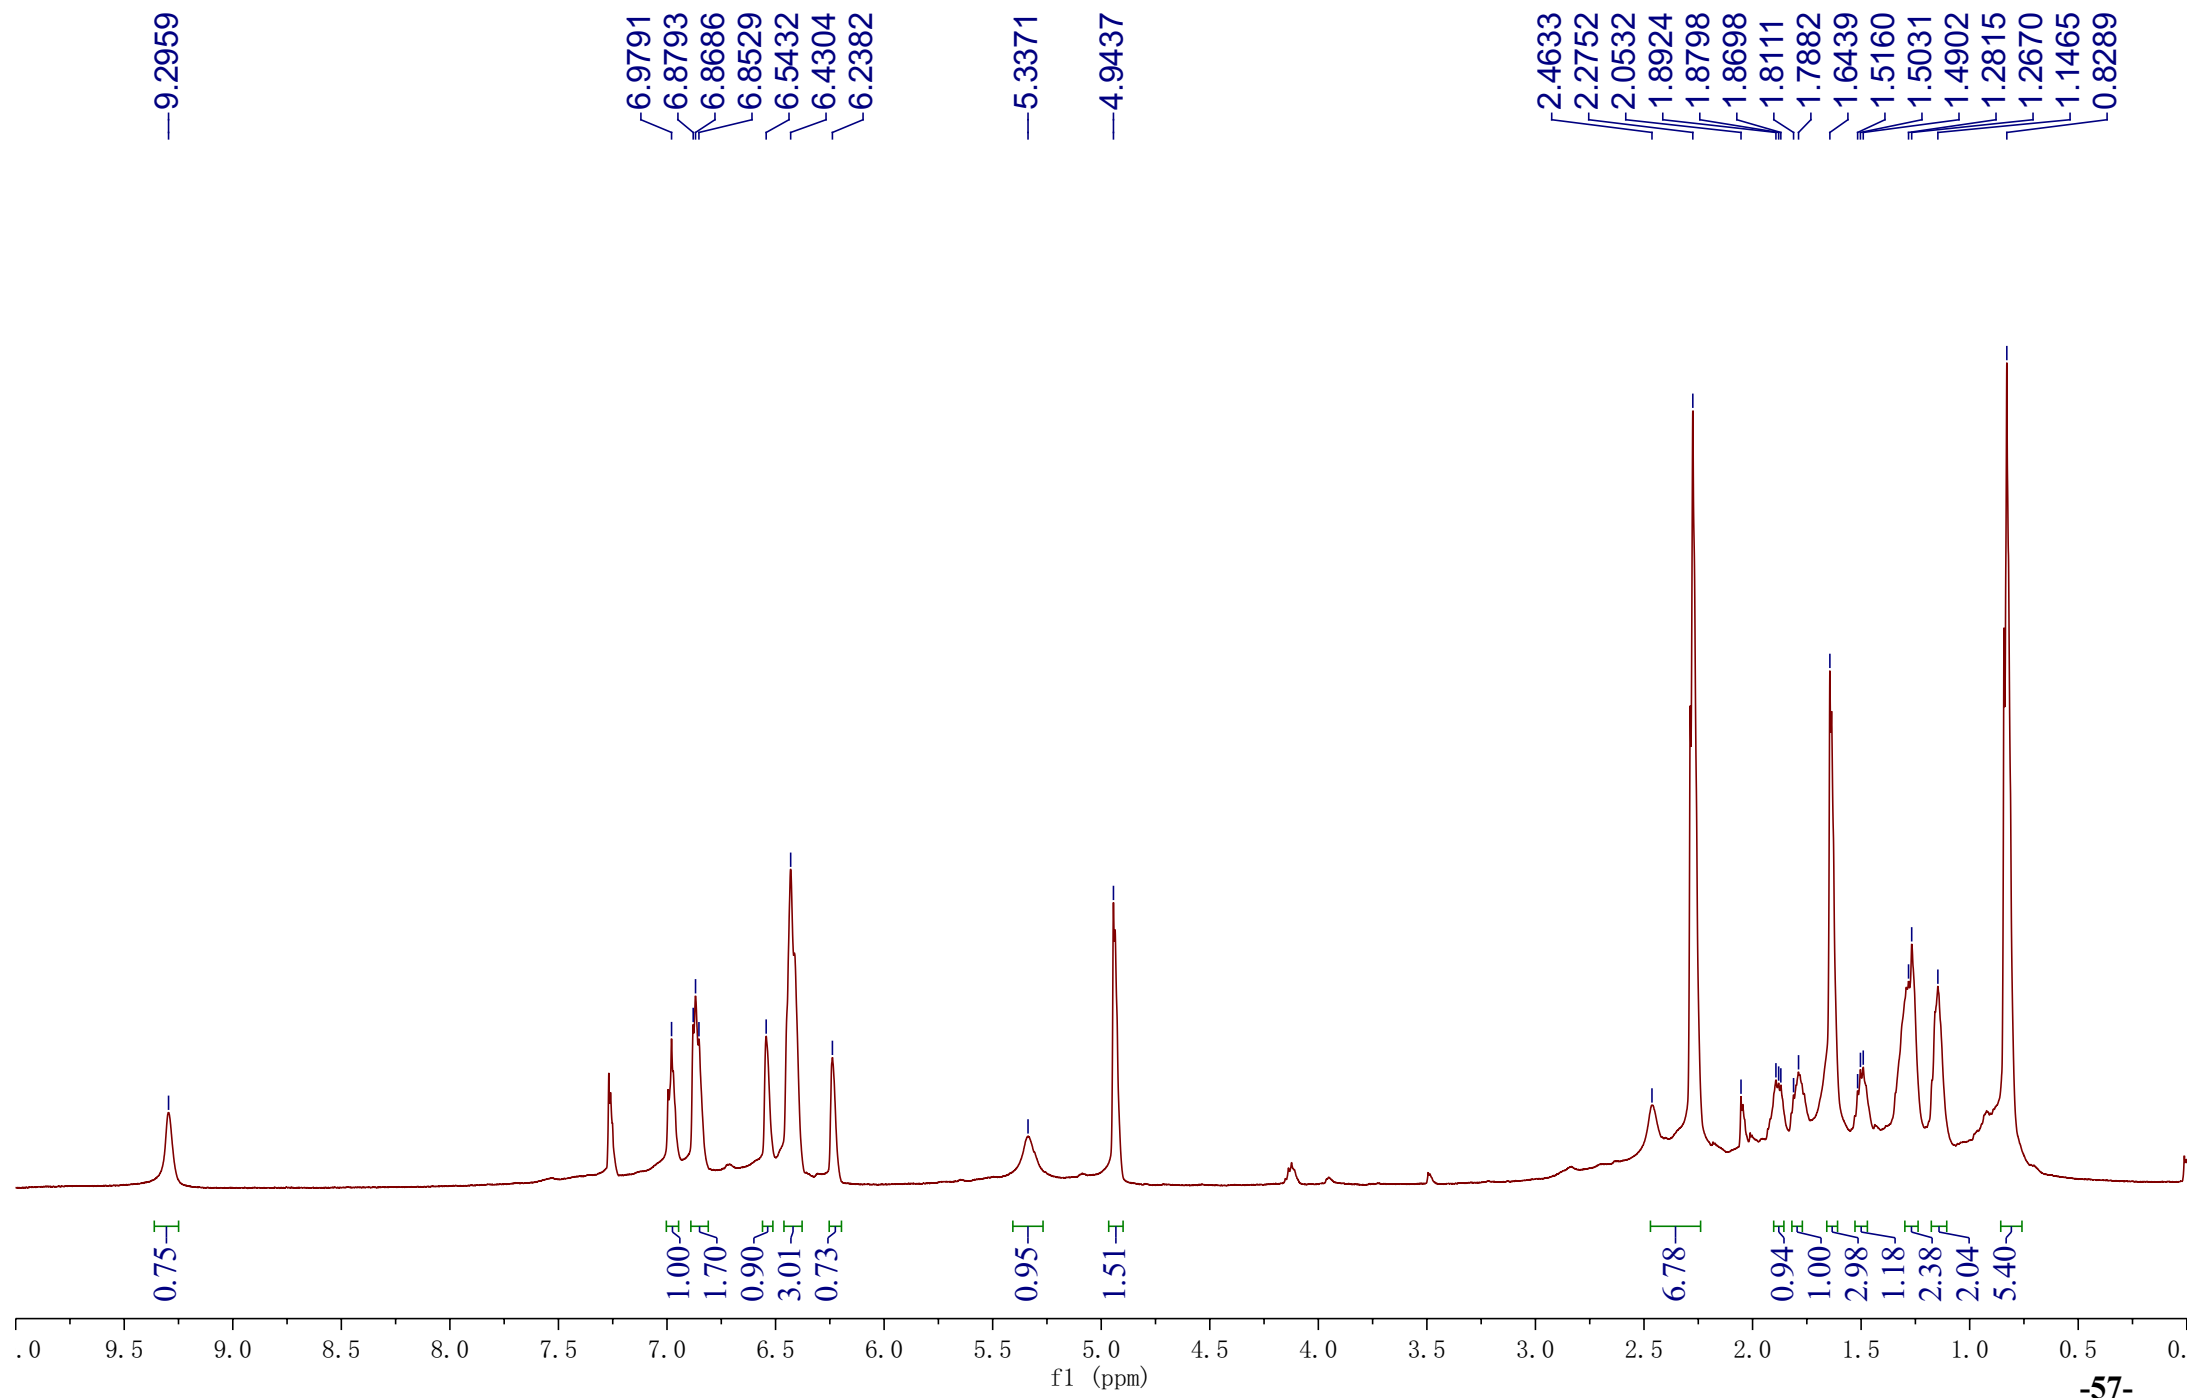

**Figure S46.**  $^{13}\text{C}$  NMR (100 MHz,  $\text{CDCl}_3$ ) Spectrum of Compound **10**

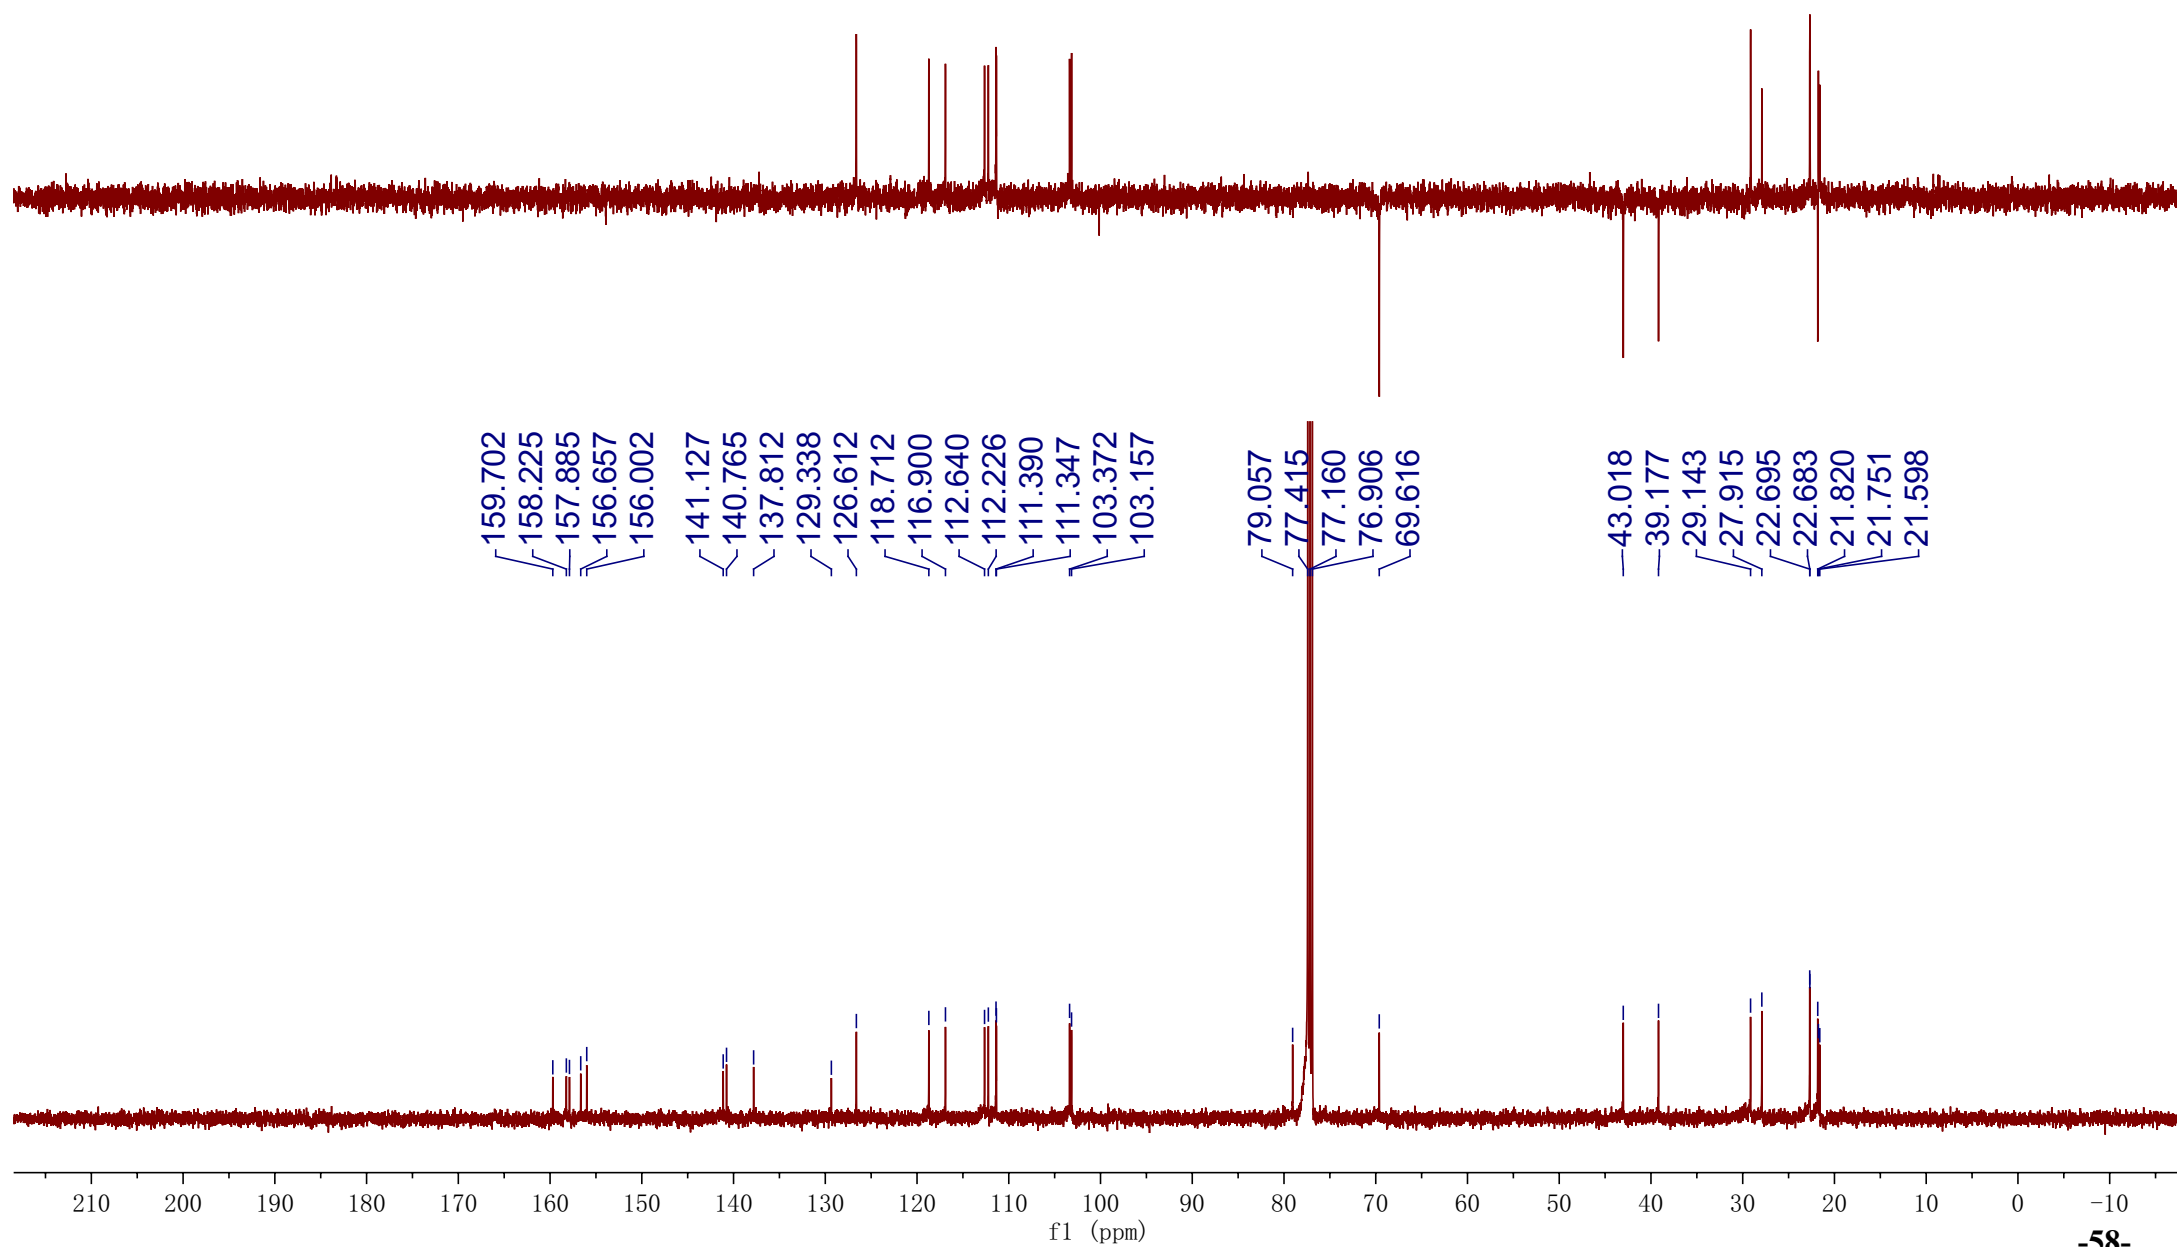

**Figure S47.**  $^1\text{H}$  NMR (400 MHz, Acetone- $d_6$ ) Spectrum of Compound **11**

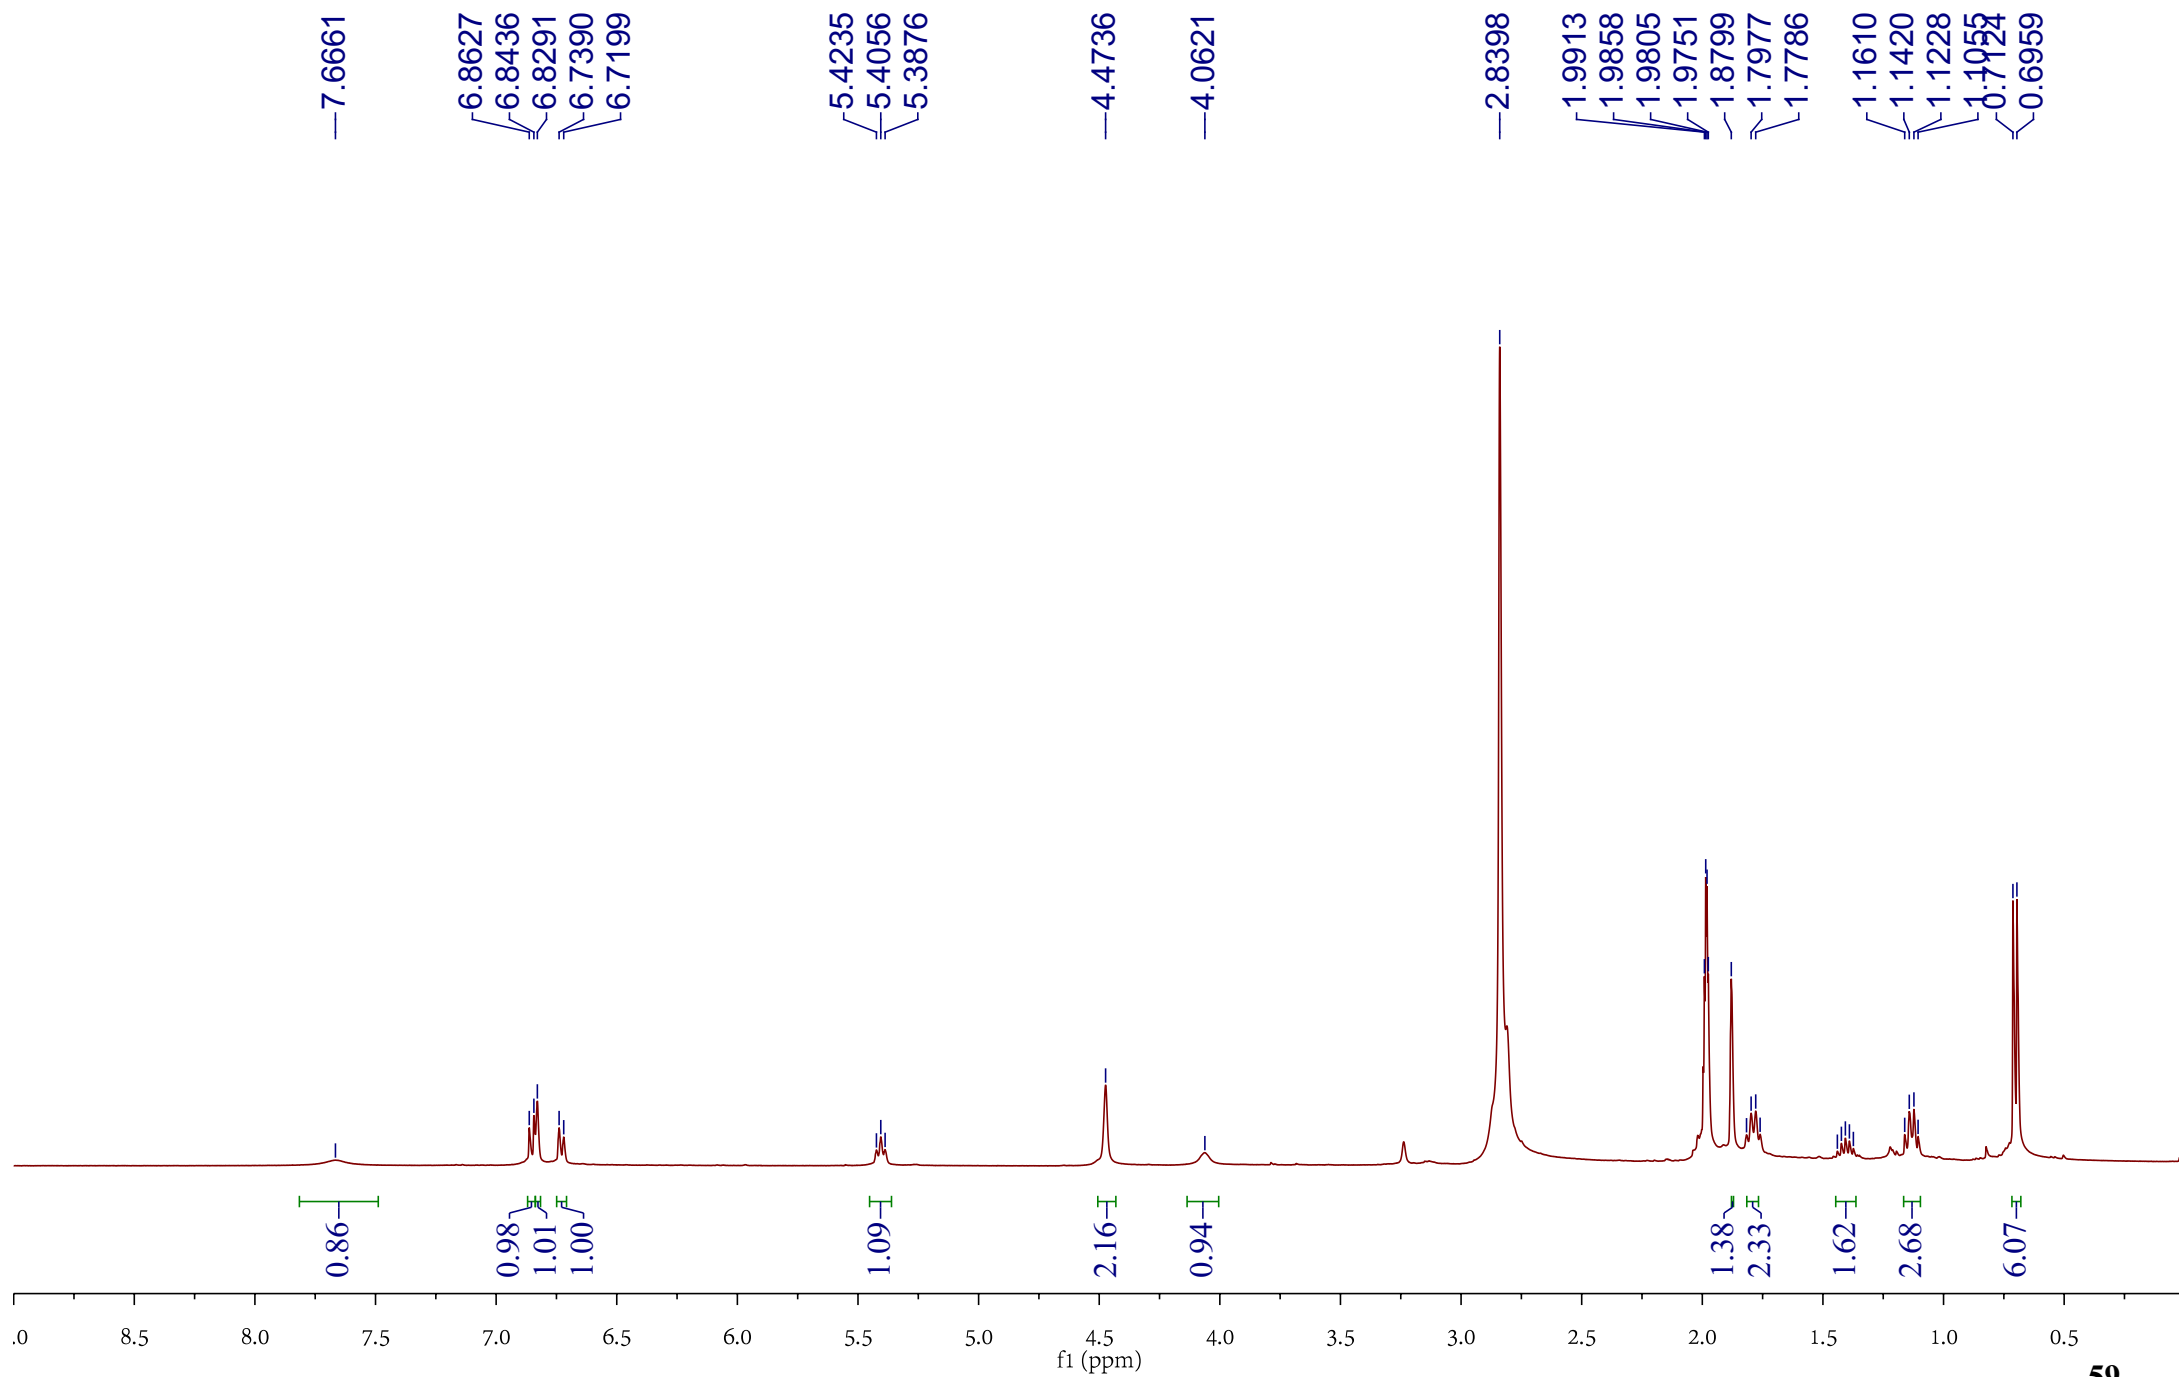

**Figure S48.**  $^{13}\text{C}$  NMR (100 MHz, Acetone- $d_6$ ) Spectrum of Compound **11**

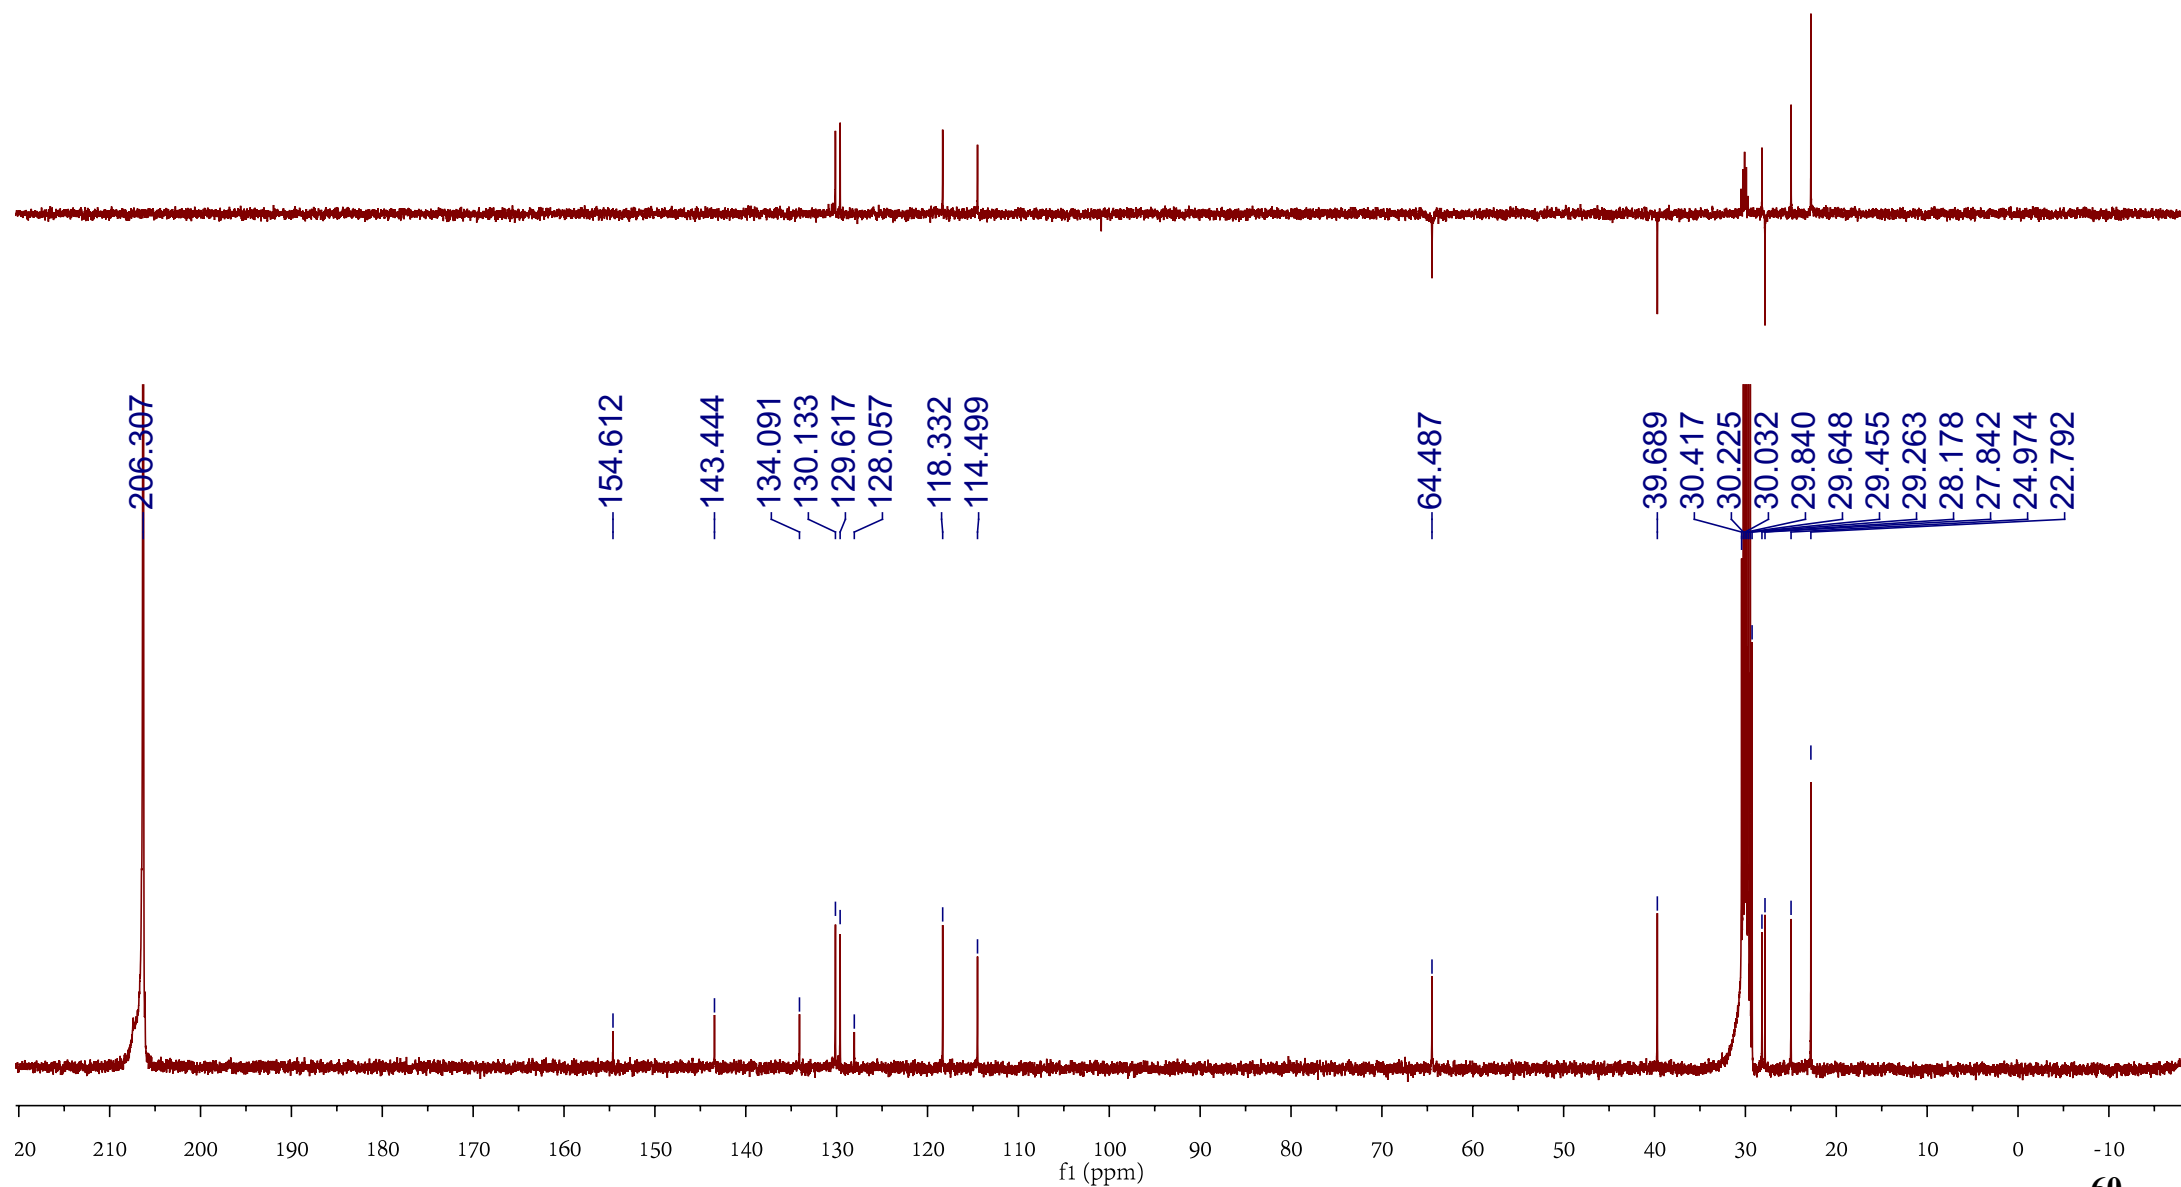



**Figure S49.**  $^1\text{H}$  NMR (400 MHz,  $\text{CDCl}_3$ ) Spectrum of Compound **12**

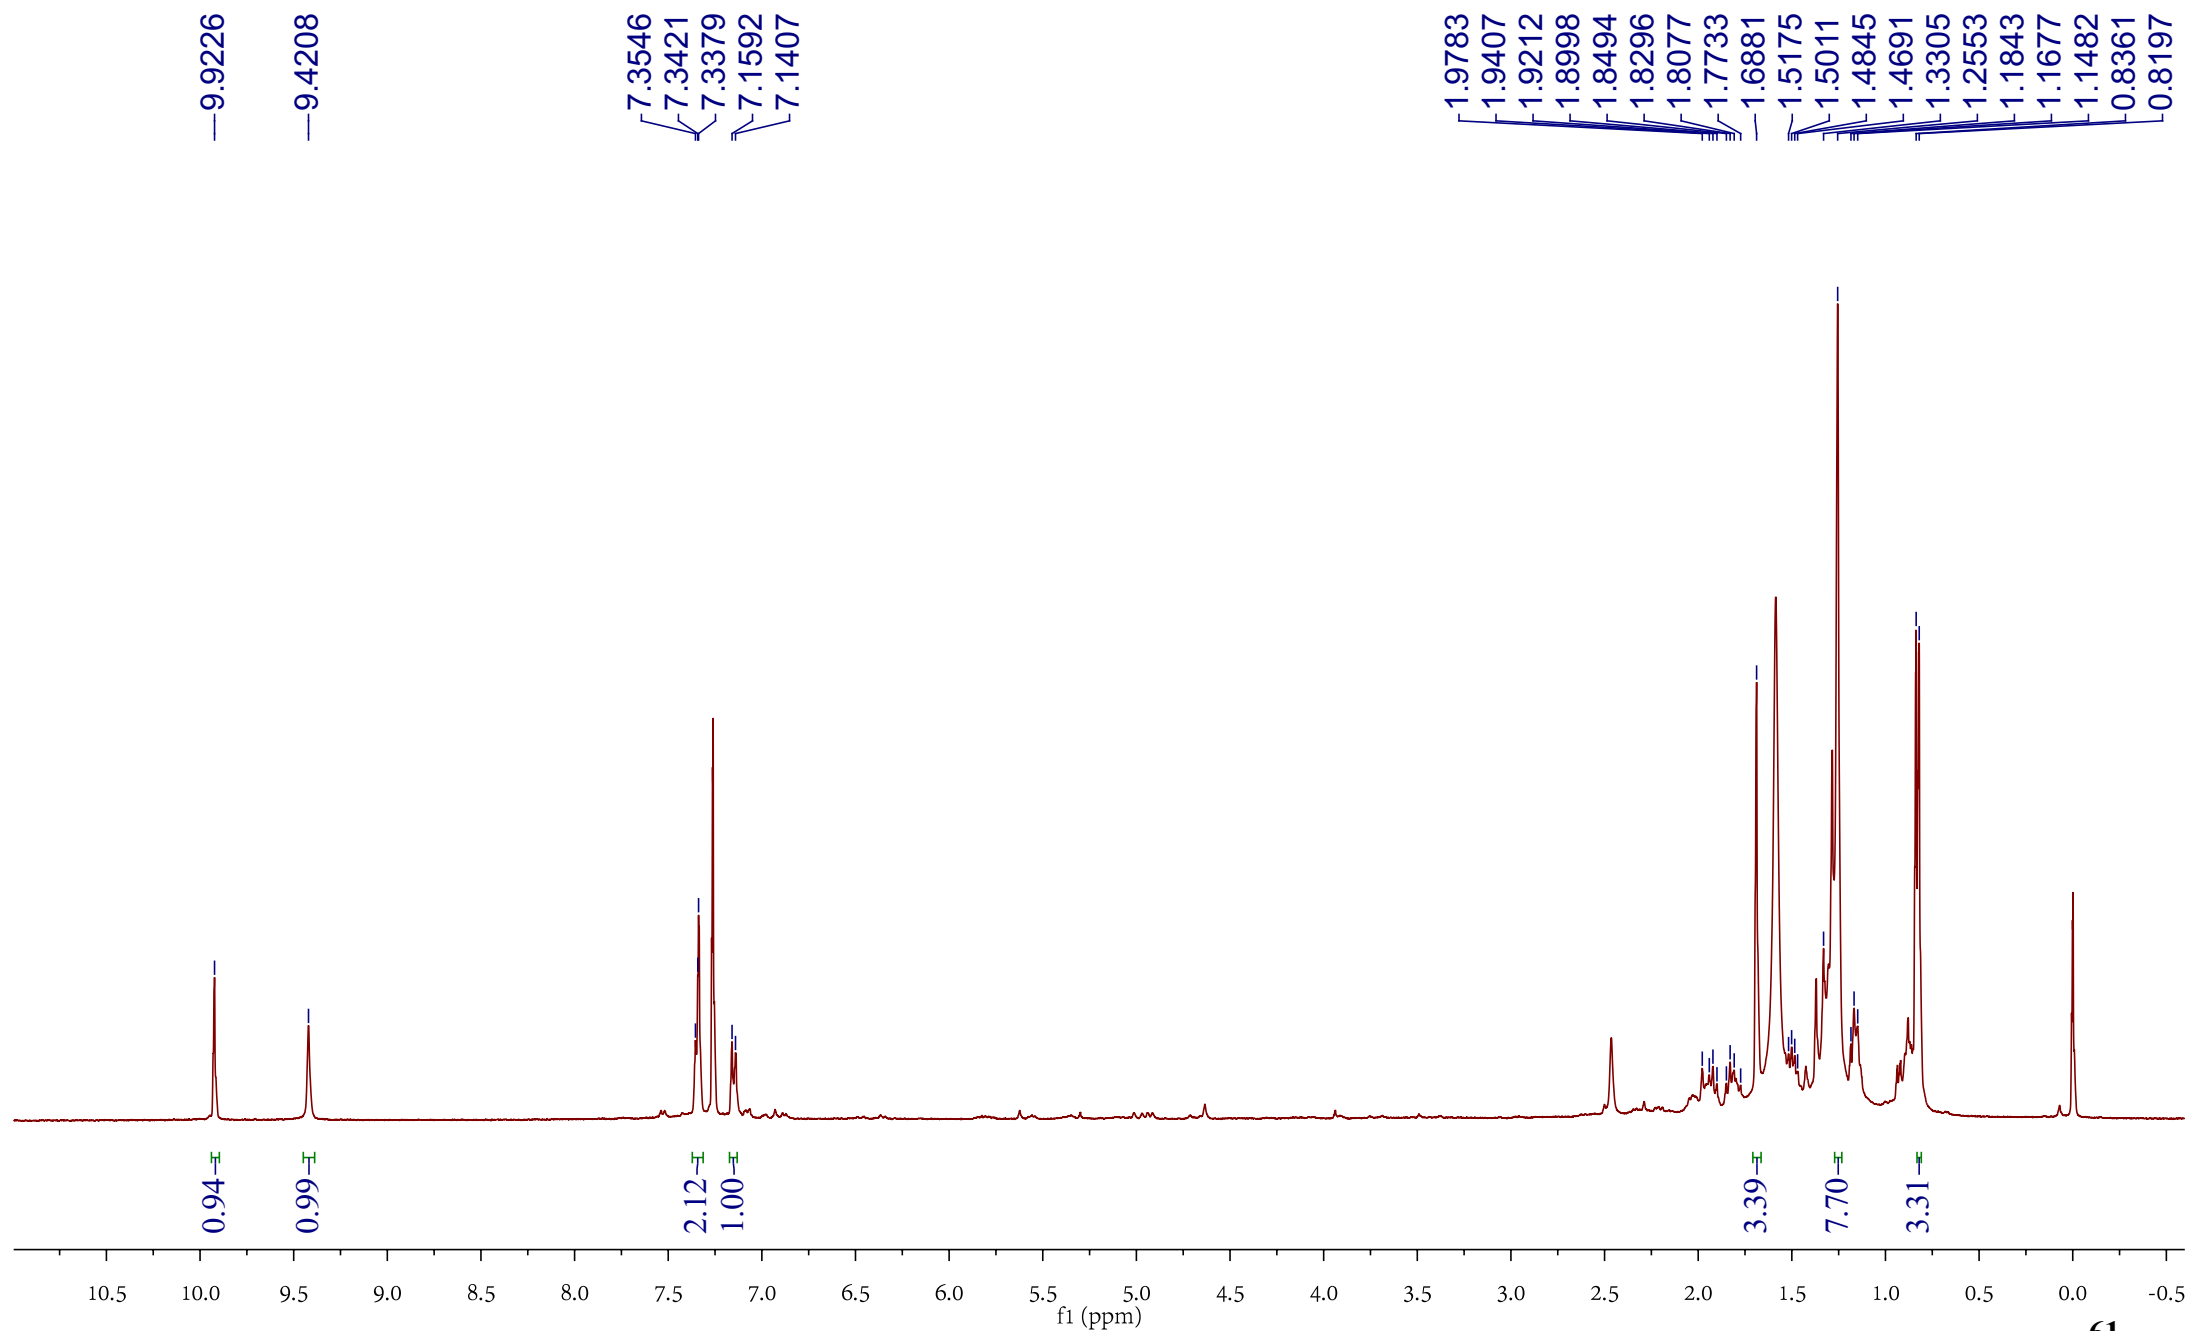

**Figure S50.**  $^{13}\text{C}$  NMR (100 MHz,  $\text{CDCl}_3$ ) Spectrum of Compound **12**

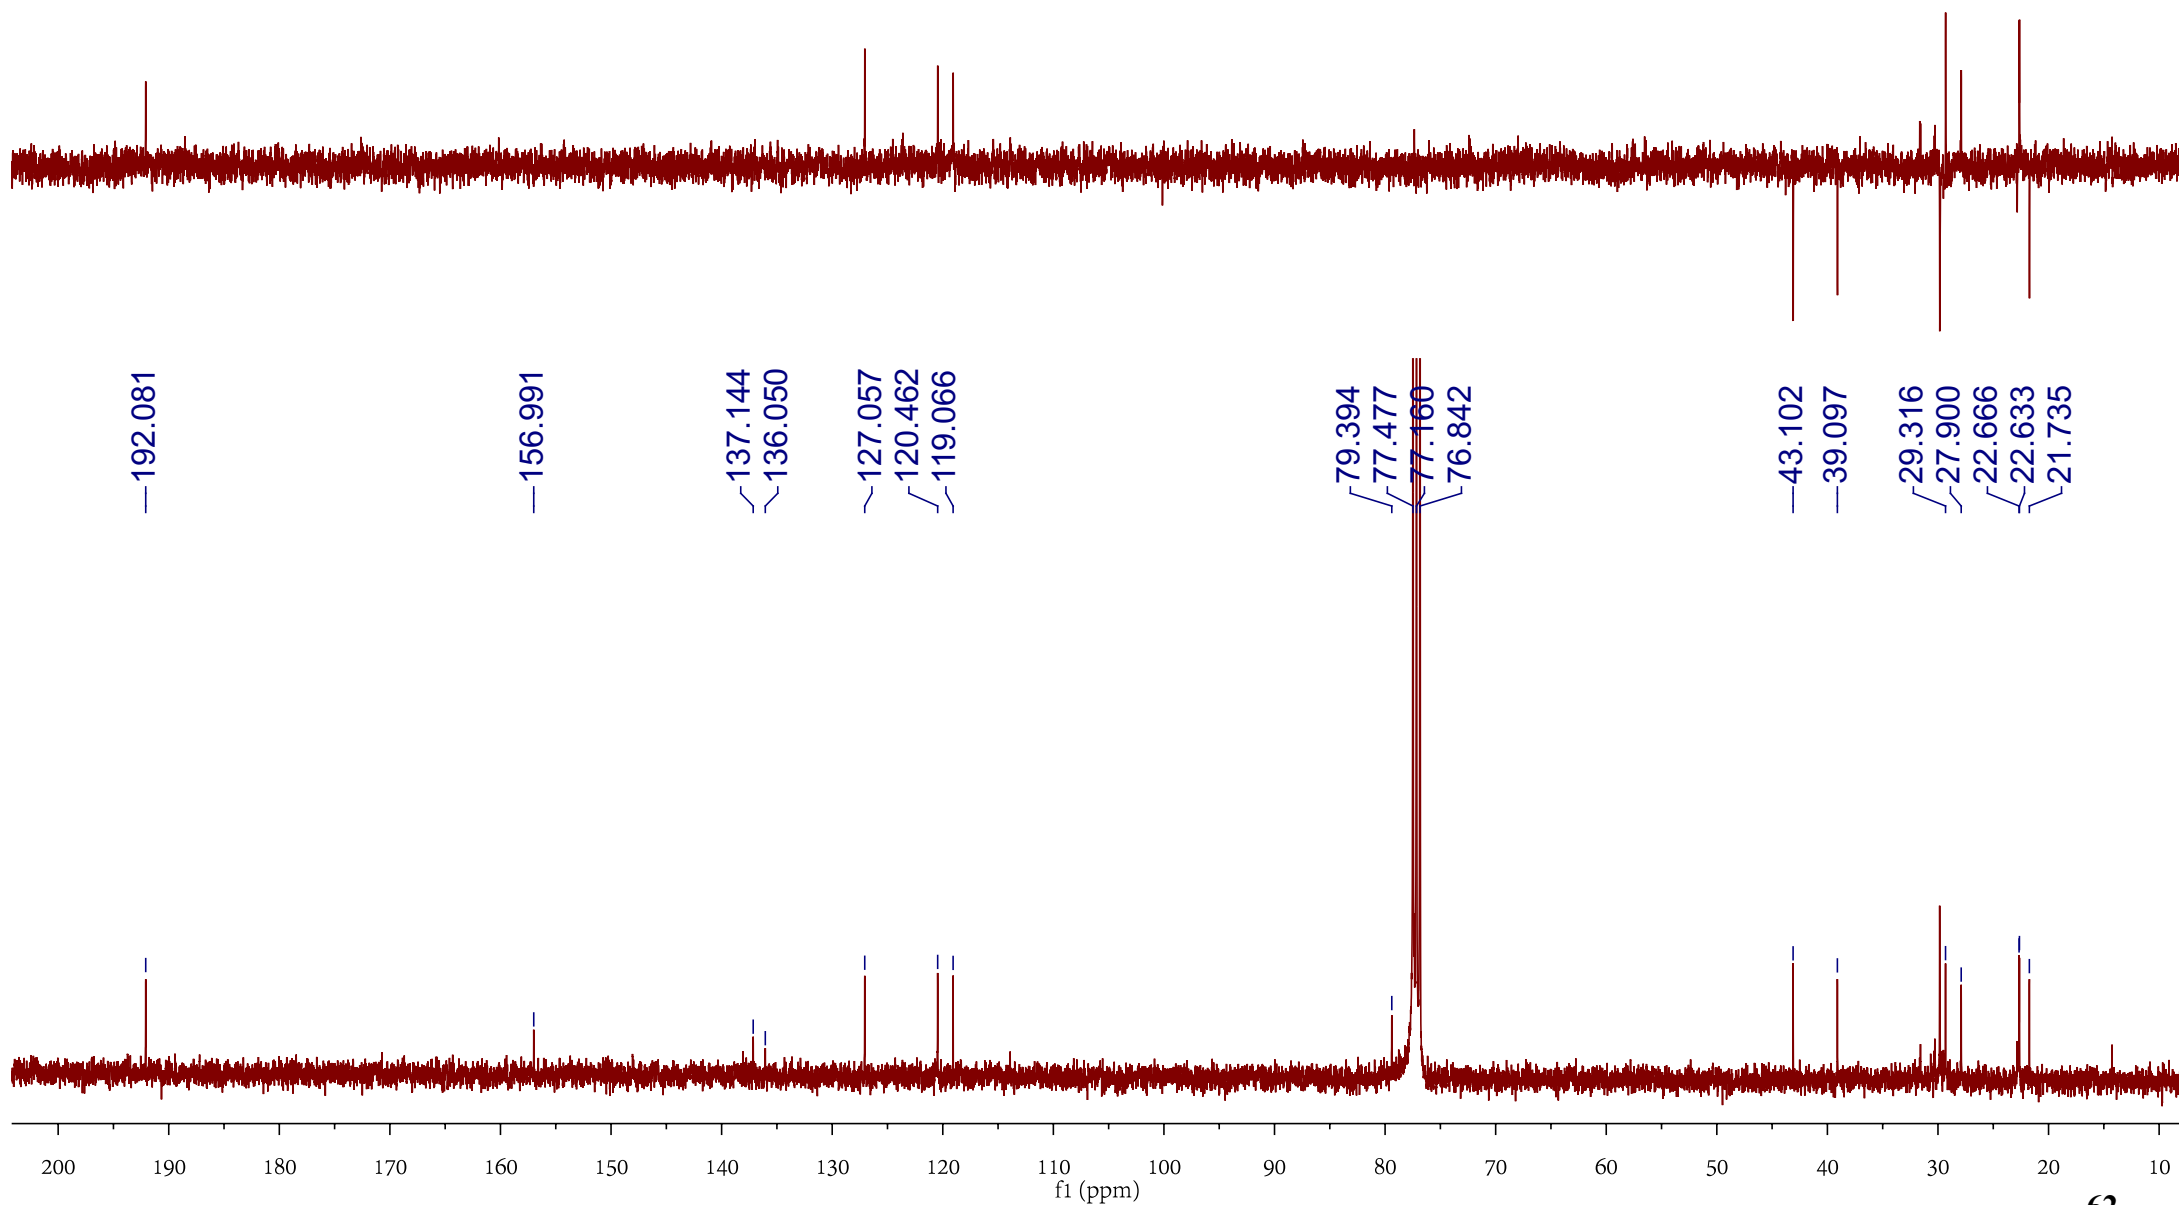

**Figure S51.**  $^1\text{H}$  NMR (500 MHz, Acetone- $d_6$ ) Spectrum of Compound **13**

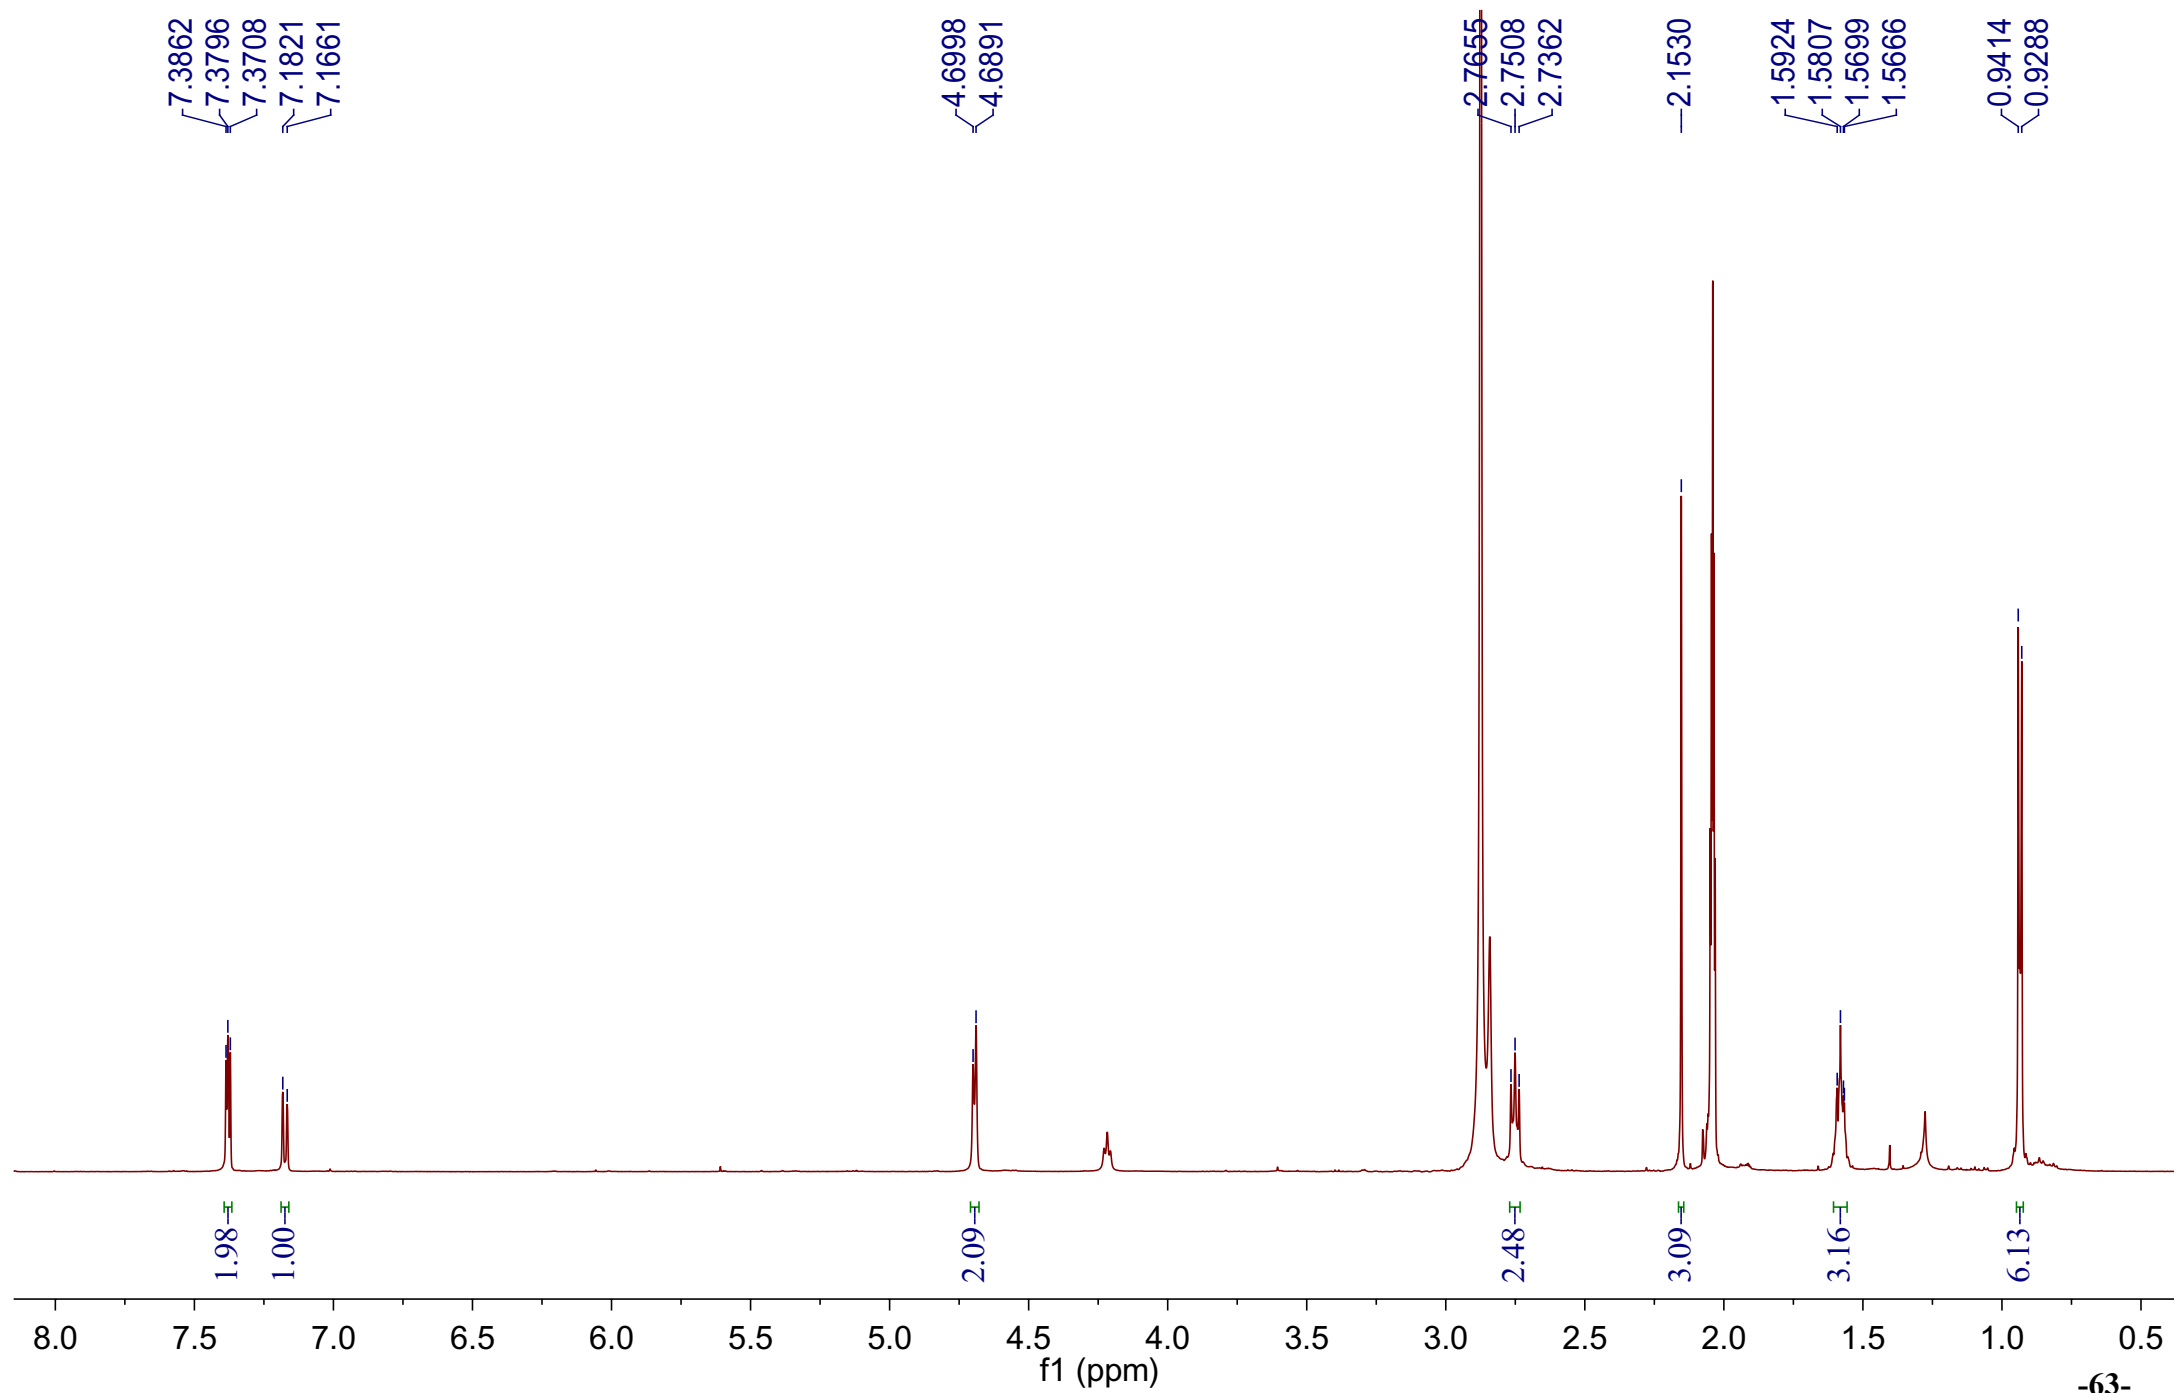

**Figure S52.**  $^{13}\text{C}$  NMR (125 MHz, Acetone- $d_6$ ) Spectrum of Compound **13**

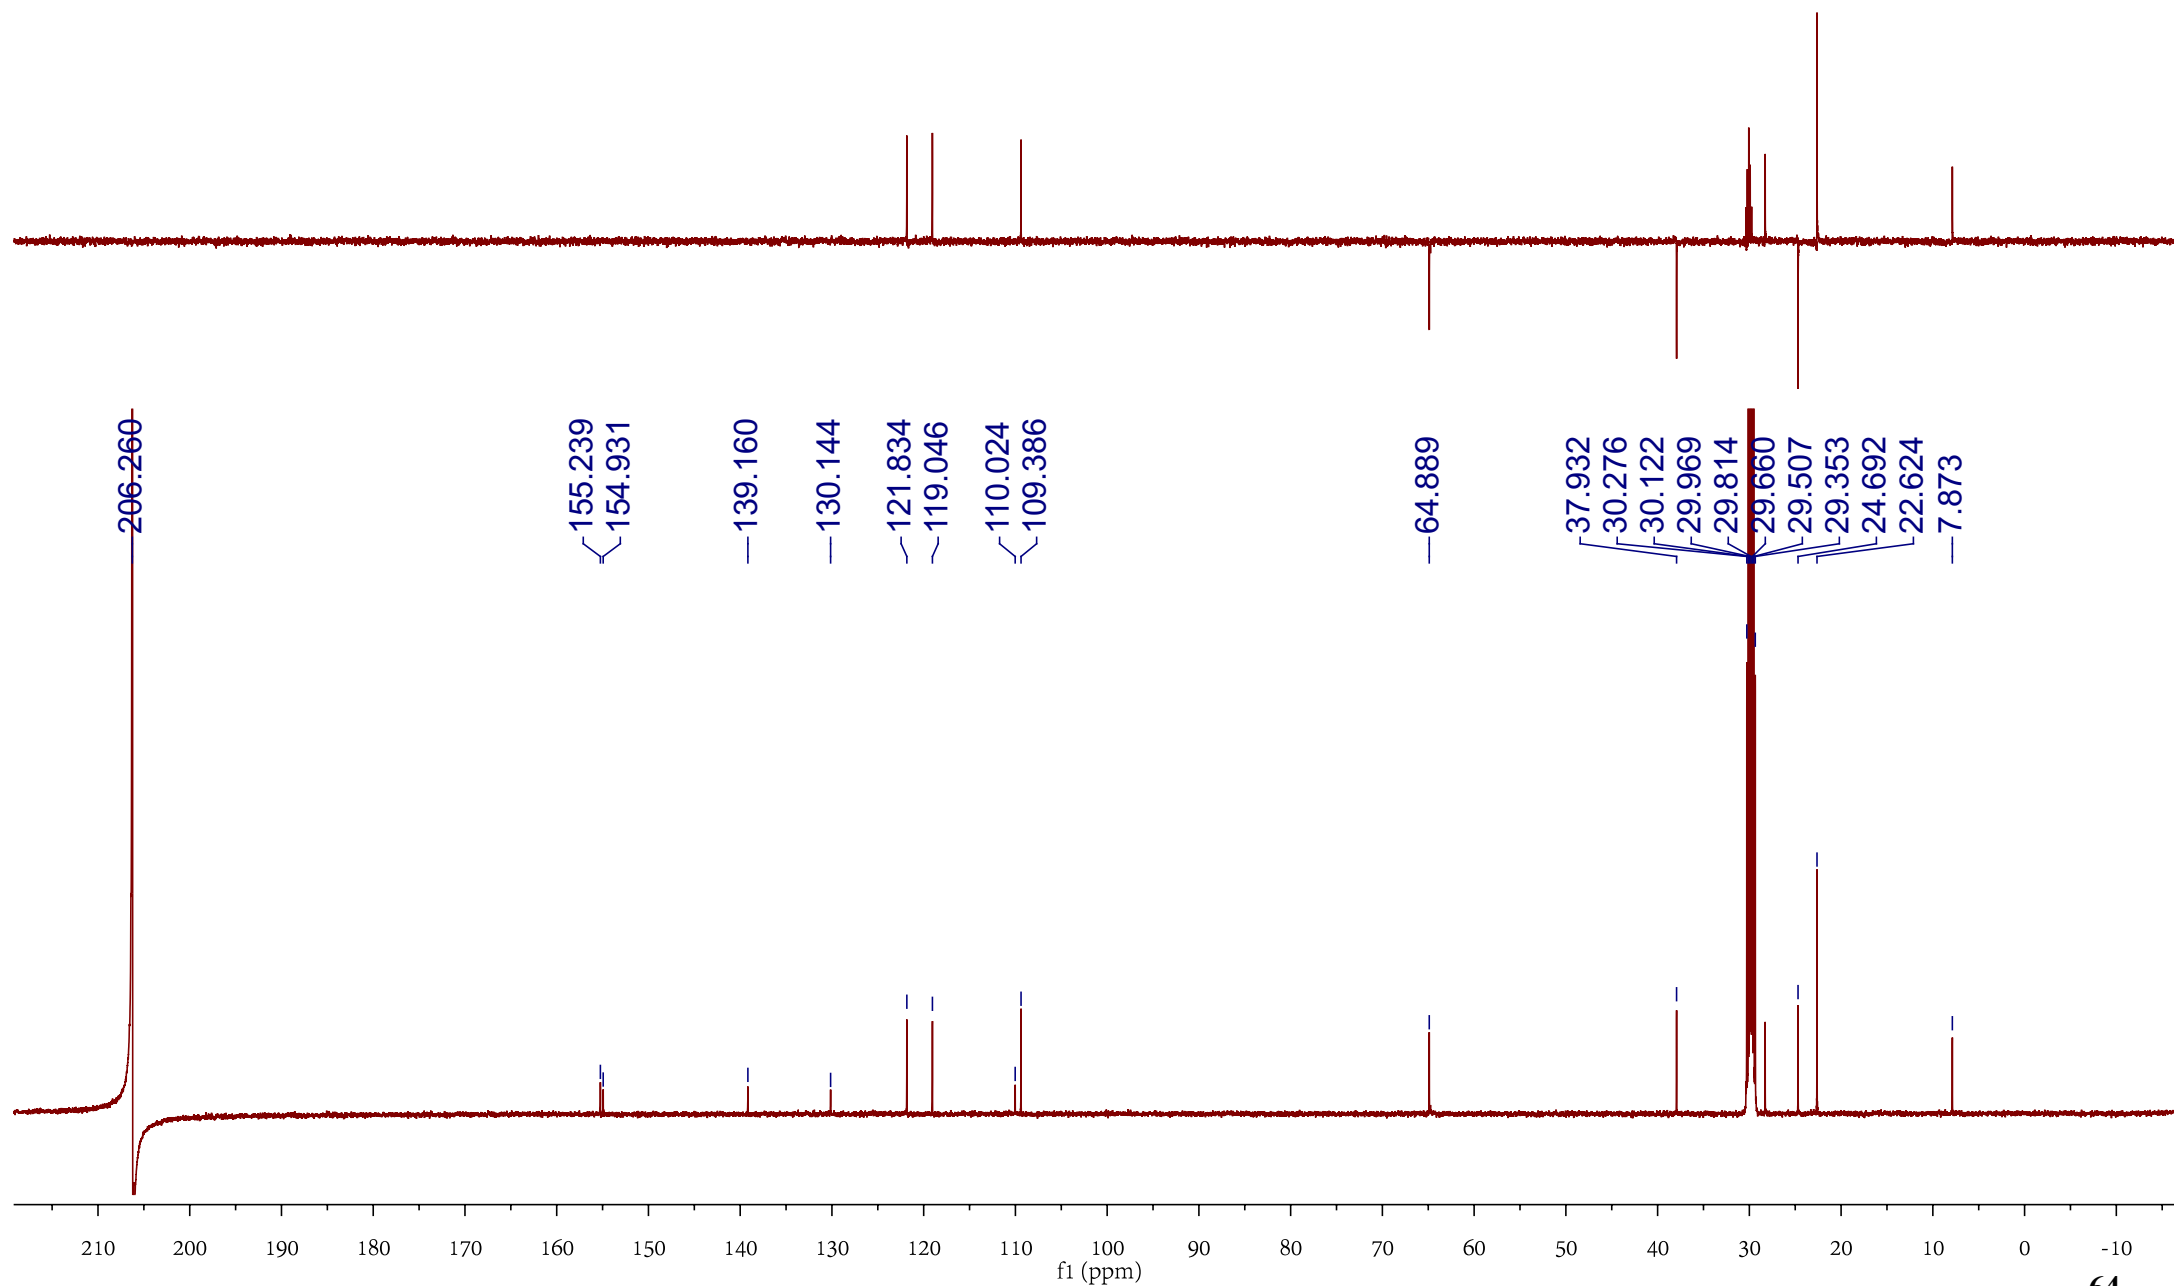

**Figure S53.**  $^1\text{H}$  NMR (500 MHz, Acetone- $d_6$ ) Spectrum of Compound **14**

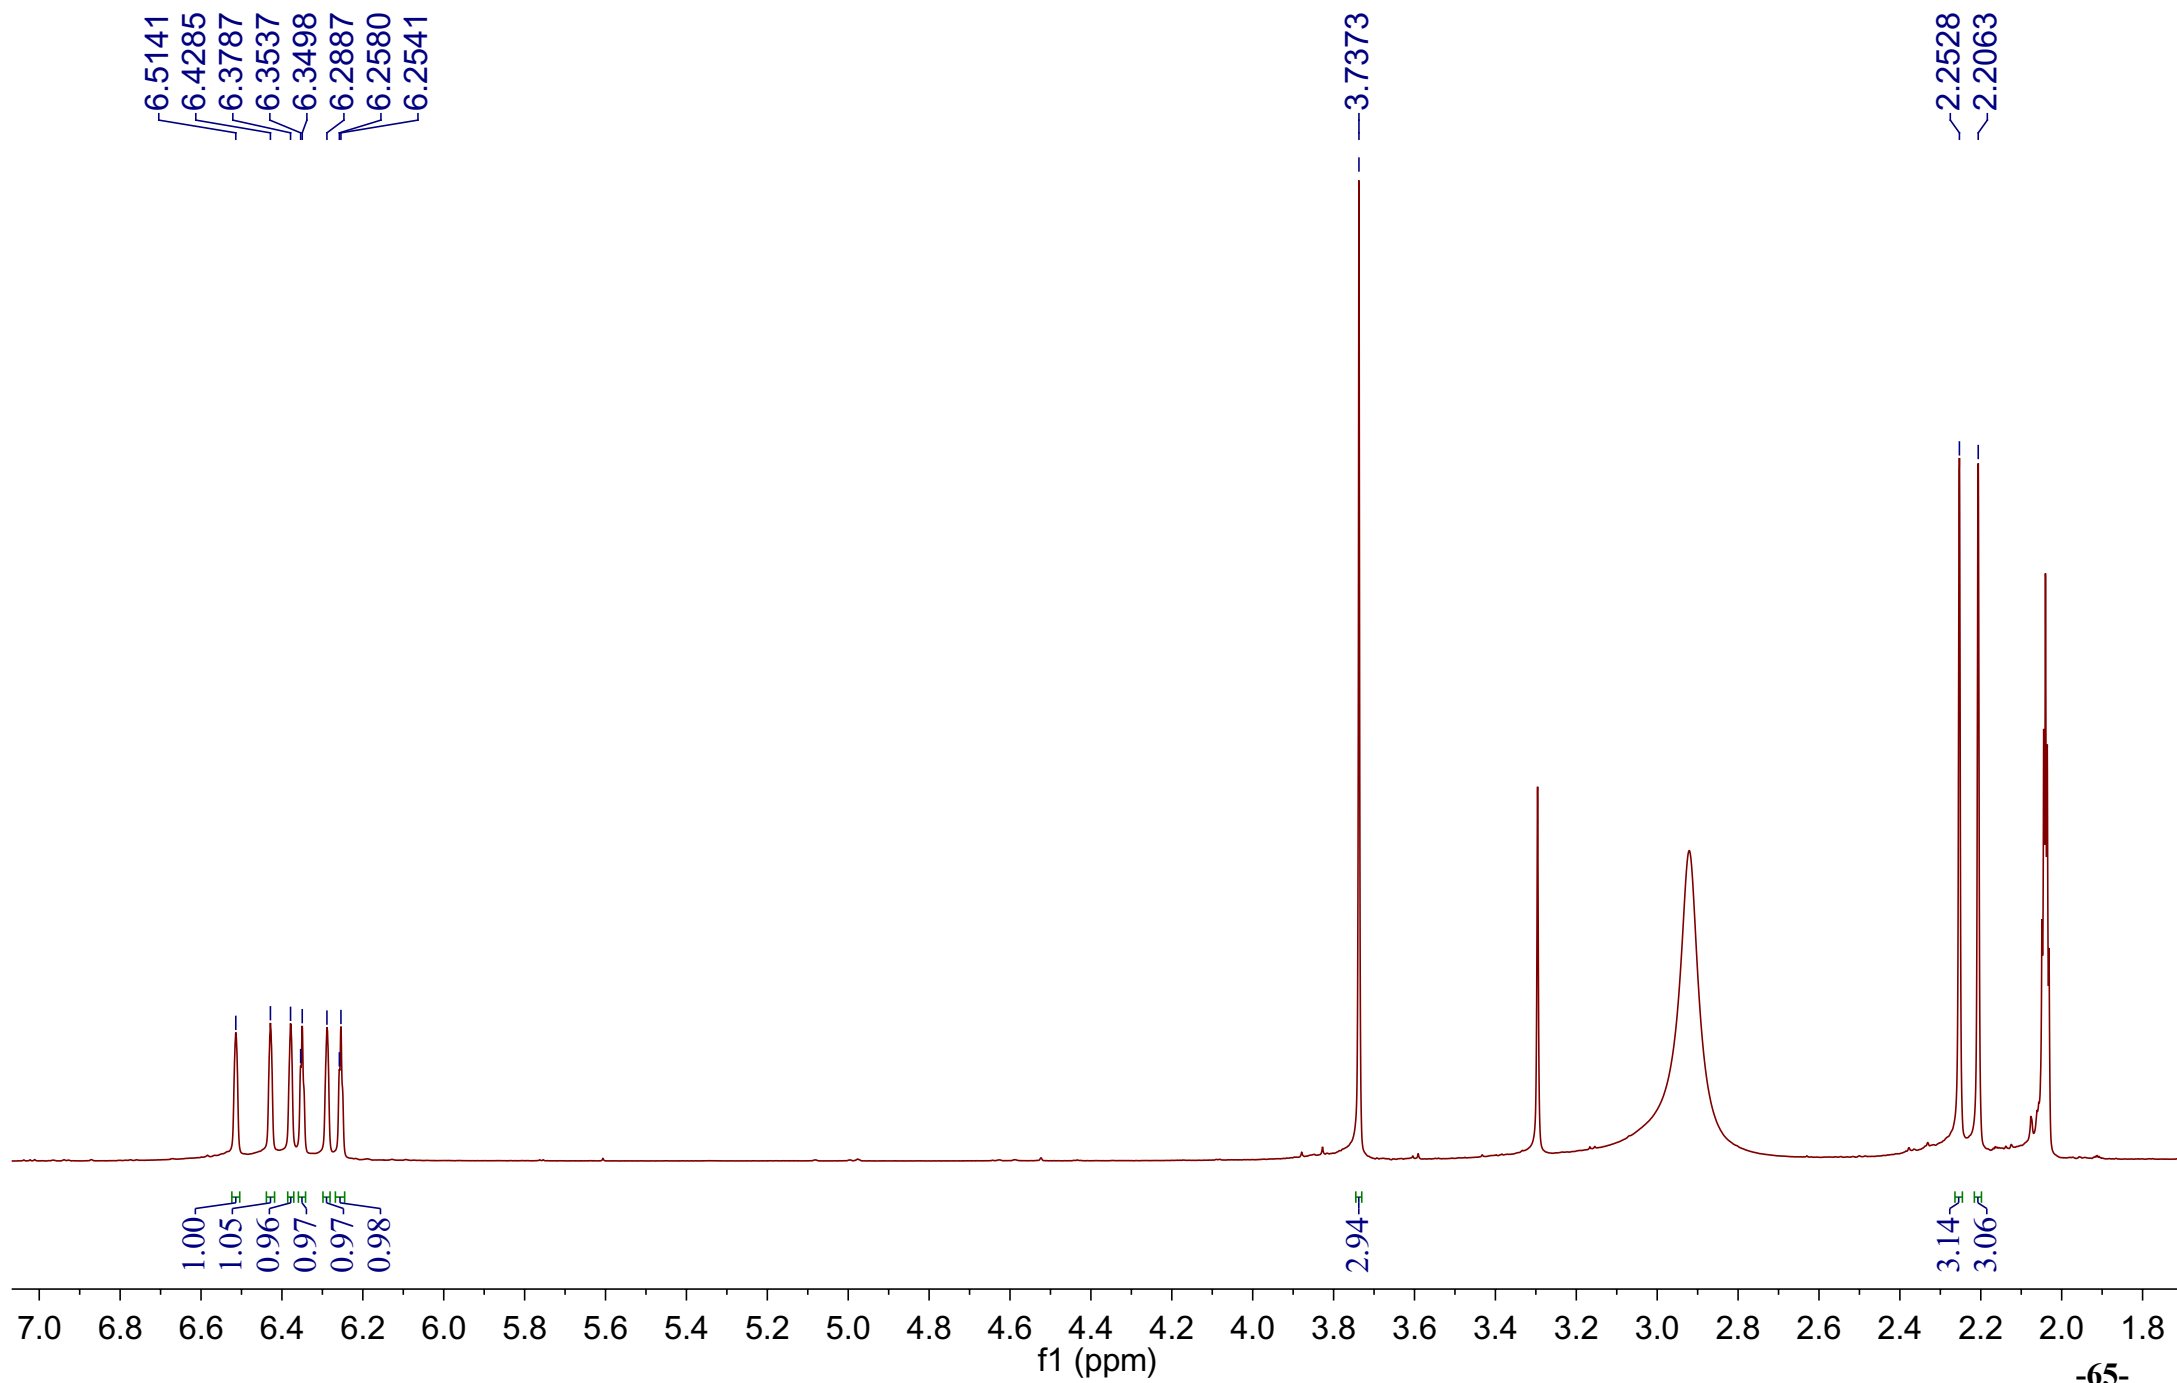

**Figure S54.**  $^{13}\text{C}$  NMR (125 MHz, Acetone- $d_6$ ) Spectrum of Compound **14**

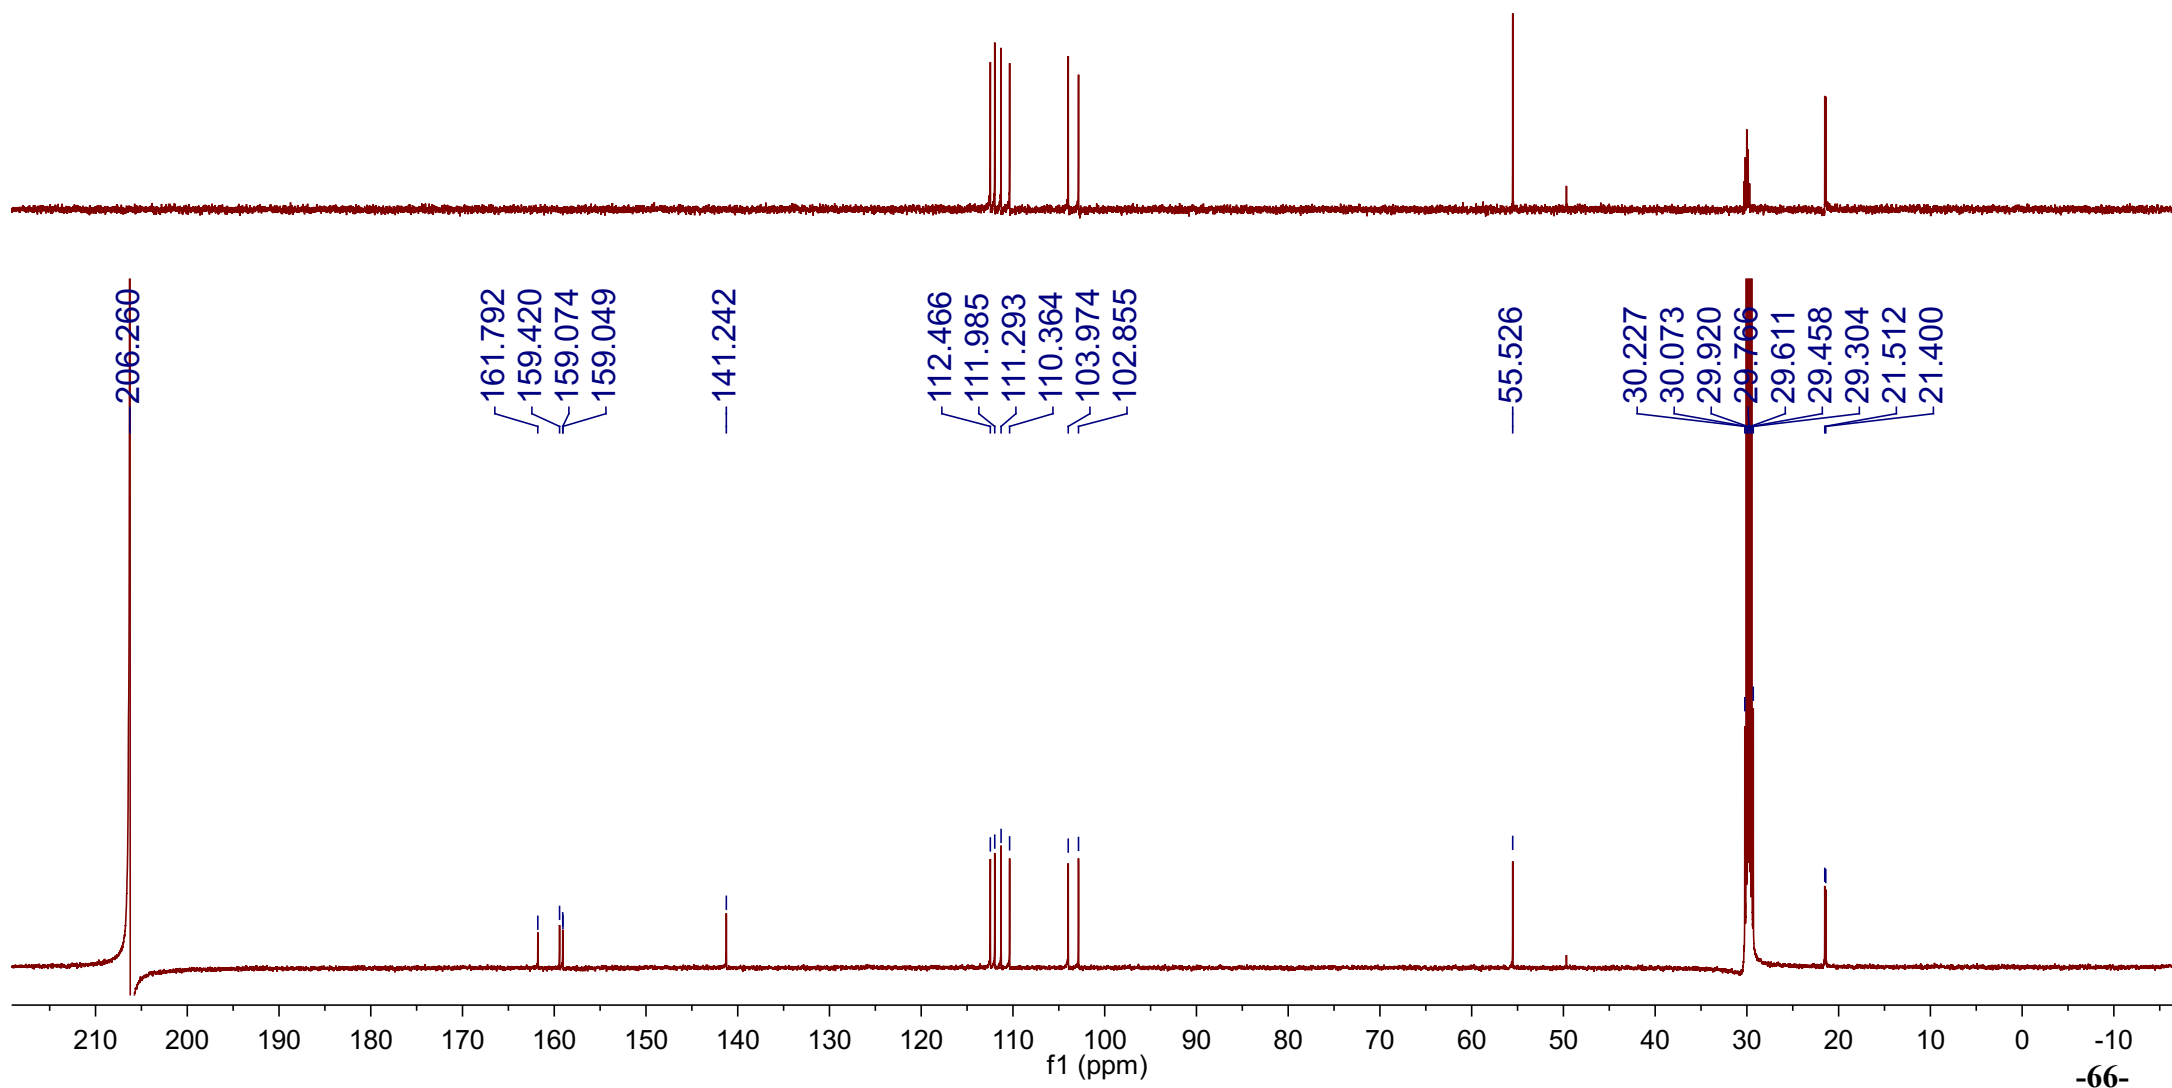

**Figure S55.**  $^1\text{H}$  NMR (400 MHz,  $\text{CDCl}_3$ ) Spectrum of Compound **15**

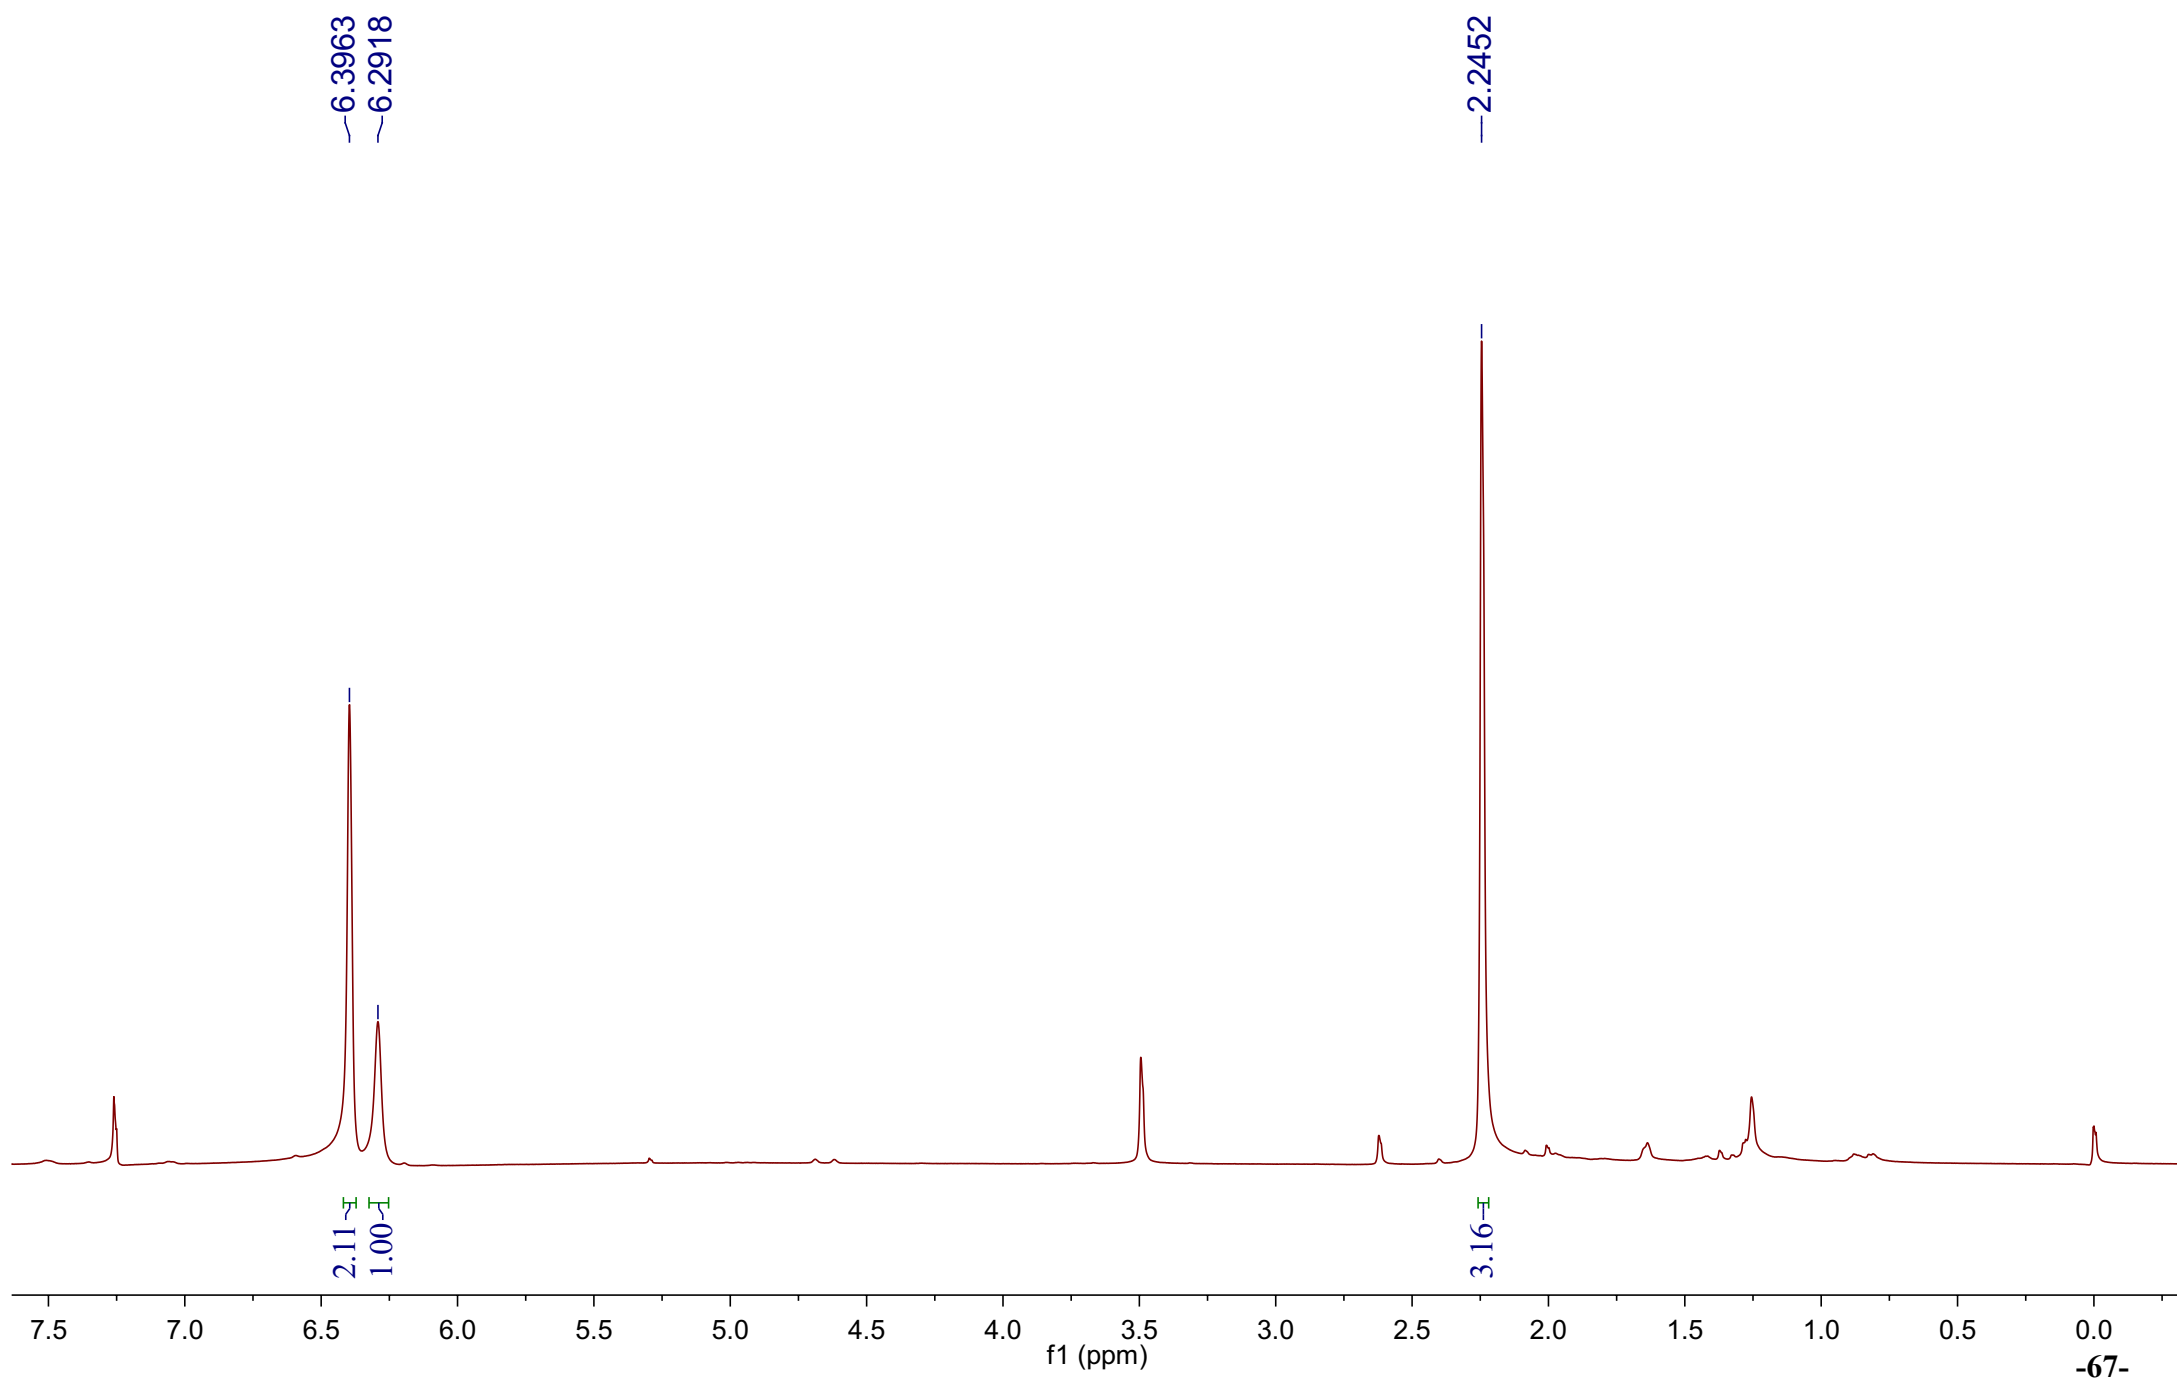

**Figure S56.**  $^{13}\text{C}$  NMR (100 MHz,  $\text{CDCl}_3$ ) Spectrum of Compound **15**

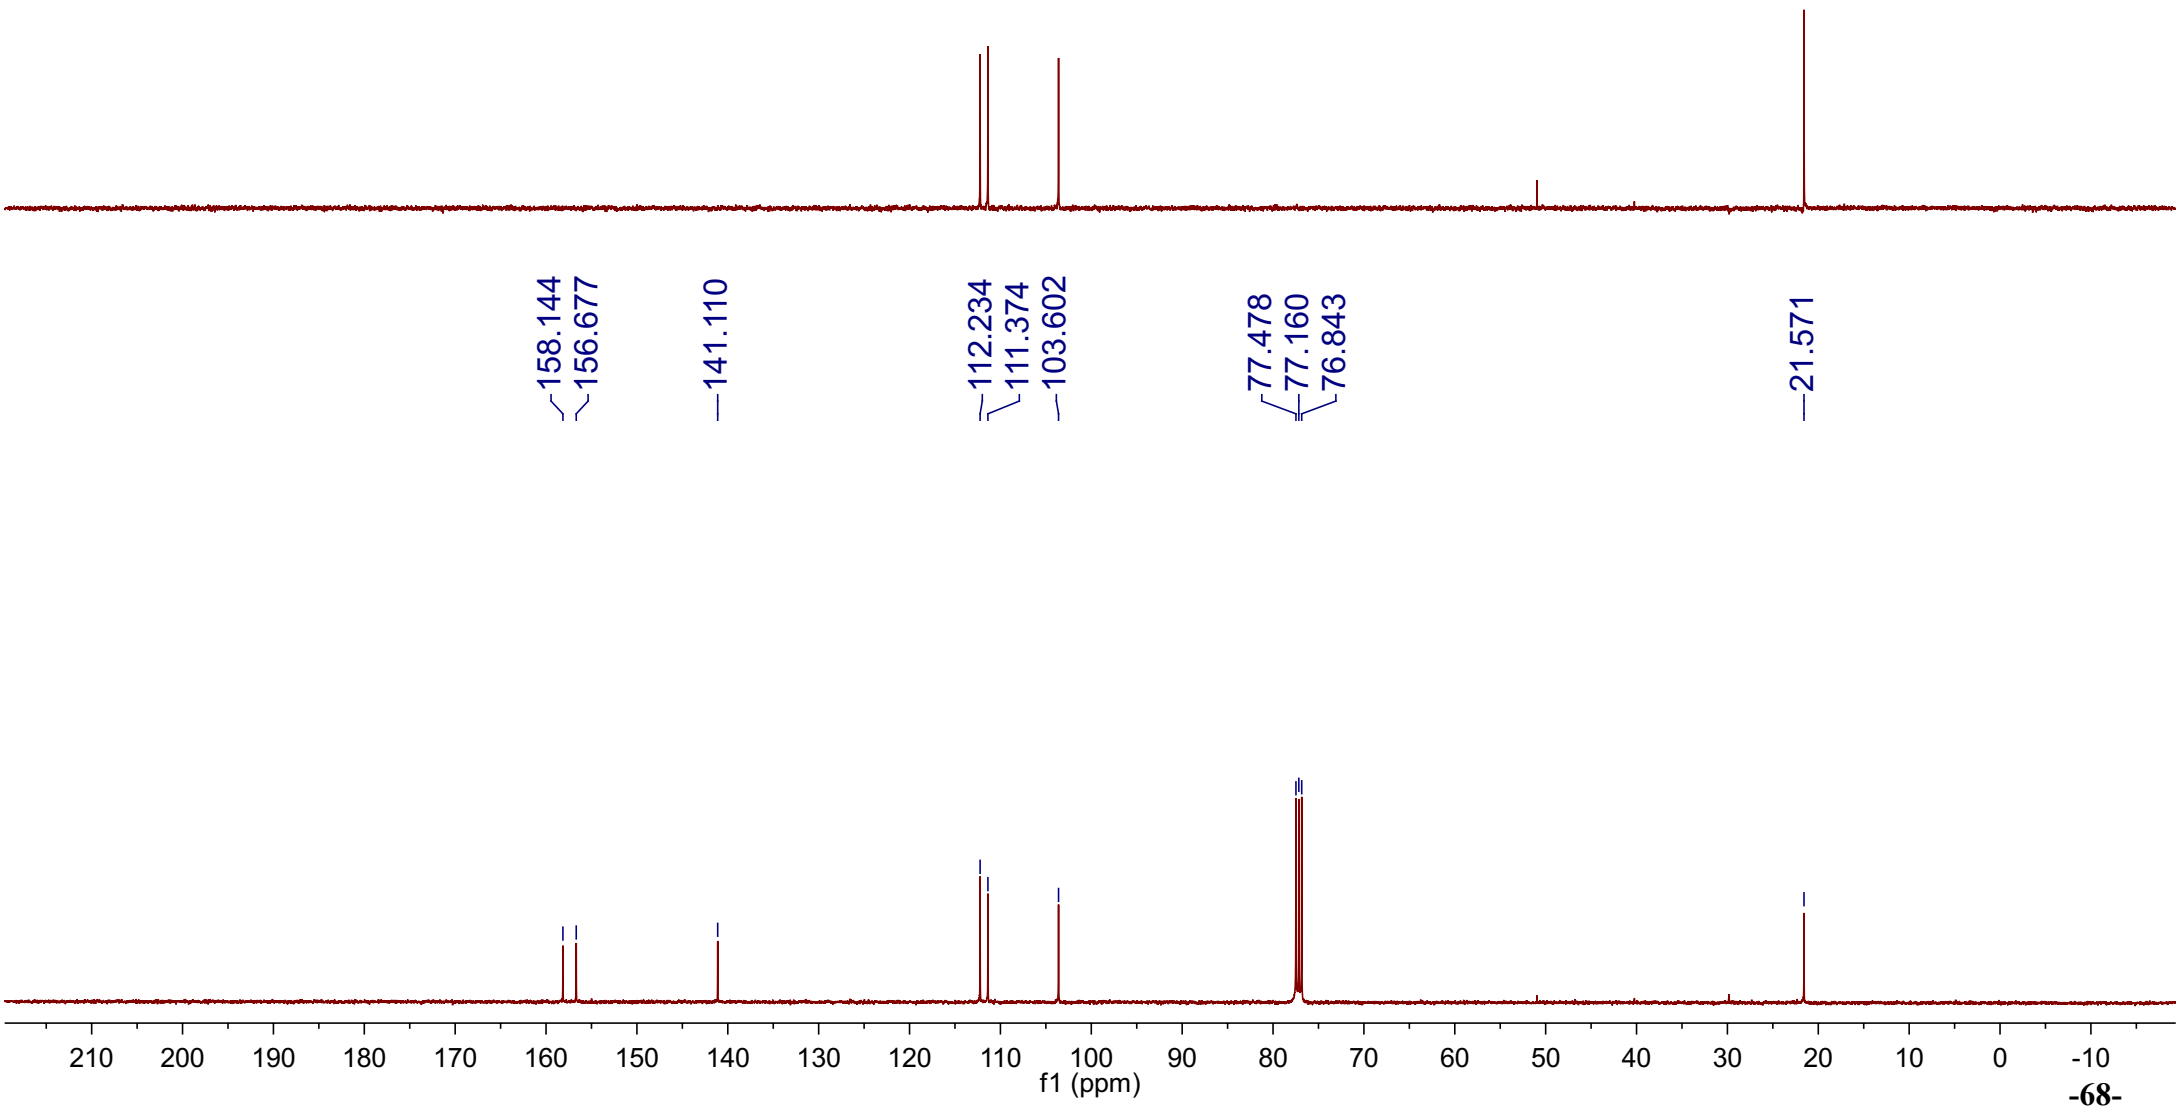



**Figure S57.** B3LYP/6-31G(d) optimized lowest energy conformers for compound **1a**

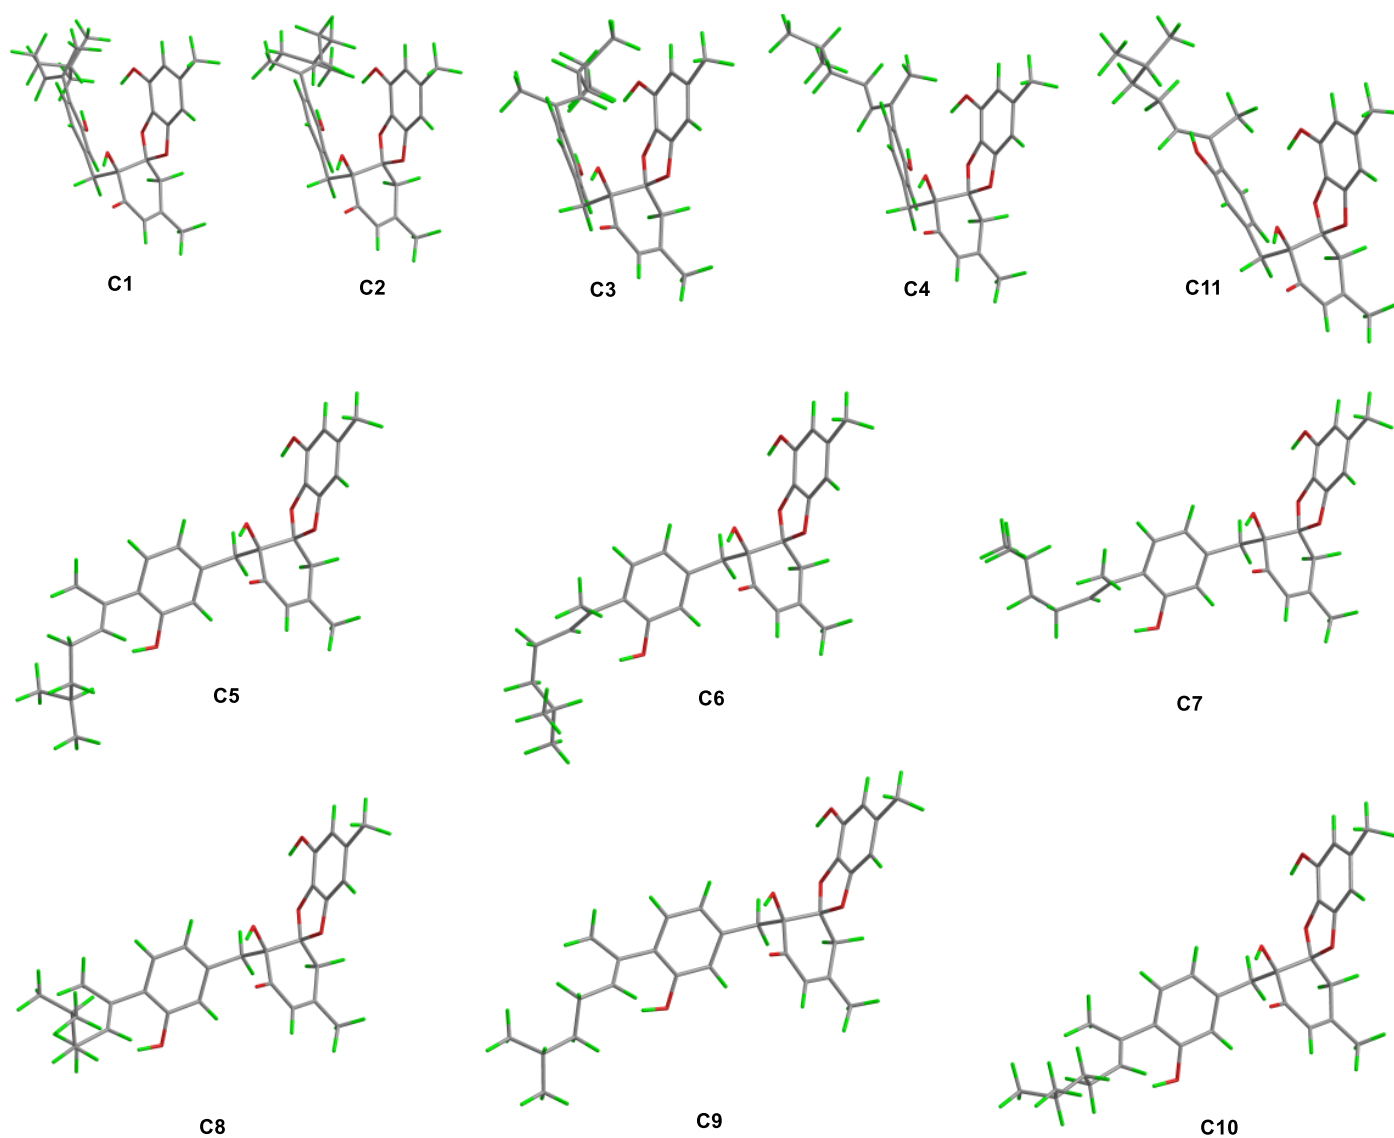

**Table S11.** Energy (298.15 K) analysis for **1a**

| Conf. | G (Hartree)  | $\Delta G$ (Kcal/mol) | Boltzmann Distribution |
|-------|--------------|-----------------------|------------------------|
| C1    | -1576.36819  | 1.32781116            | 0.022361901            |
| C2    | -1576.36916  | 0.71912646            | 0.062503648            |
| C3    | -1576.36917  | 0.71285136            | 0.063169494            |
| C5    | -1576.368522 | 1.11947784            | 0.031790403            |
| C6    | -1576.369855 | 0.28300701            | 0.130540797            |
| C7    | -1576.369938 | 0.23092368            | 0.142542078            |
| C8    | -1576.369133 | 0.73606923            | 0.060740714            |
| C9    | -1576.369044 | 0.79191762            | 0.055274122            |
| C10   | -1576.370306 | 0                     | 0.210522097            |
| C11   | -1576.370273 | 0.02070783            | 0.203287651            |

**Table S12.** Calculated ECD data for **1a** in PCM (acetonitrile)

| State | C1                      |                     | C2                      |                     | C3                      |                     | C4                      |                     |
|-------|-------------------------|---------------------|-------------------------|---------------------|-------------------------|---------------------|-------------------------|---------------------|
|       | Excitation energies(eV) | Rotatory Strengths* |
| 1     | 4.0915                  | -1.5385             | 4.0923                  | -3.1039             | 4.0927                  | -3.1232             | 4.0919                  | -0.5203             |
| 2     | 4.4354                  | -16.5781            | 4.4334                  | -12.7353            | 4.4343                  | -13.3108            | 4.4358                  | -15.737             |
| 3     | 4.8345                  | 53.7981             | 4.8354                  | 93.4621             | 4.8404                  | 86.6287             | 4.8396                  | 55.4791             |
| 4     | 5.1532                  | -3.4616             | 5.1512                  | -2.1455             | 5.1509                  | -1.2867             | 5.1533                  | -2.4993             |
| 5     | 5.1892                  | 4.4017              | 5.1737                  | 9.6844              | 5.1737                  | 9.8081              | 5.1916                  | 5.0709              |
| 6     | 5.3021                  | 18.0378             | 5.2983                  | 35.3054             | 5.2991                  | 33.1908             | 5.3016                  | 8.2064              |
| 7     | 5.3596                  | 137.8147            | 5.353                   | 53.5263             | 5.3599                  | 37.1048             | 5.369                   | 154.6956            |
| 8     | 5.4826                  | -128.3308           | 5.4815                  | 153.2529            | 5.4835                  | 173.9194            | 5.4864                  | -147.3244           |
| 9     | 5.6978                  | 30.4734             | 5.7043                  | 55.4934             | 5.7061                  | 78.721              | 5.6993                  | 44.7001             |
| 10    | 5.7238                  | -52.7886            | 5.7176                  | -143.2772           | 5.7166                  | -168.932            | 5.7253                  | -56.5473            |
| 11    | 5.8606                  | 14.874              | 5.858                   | -1.2454             | 5.865                   | -2.8901             | 5.8666                  | 28.3229             |
| 12    | 6.0475                  | -37.1153            | 6.0408                  | 45.2323             | 6.0452                  | 45.7462             | 6.0459                  | -76.7824            |
| 13    | 6.1675                  | 21.8355             | 6.1533                  | 18.9055             | 6.1602                  | 22.981              | 6.1731                  | 2.0262              |
| 14    | 6.2249                  | 188.8616            | 6.2297                  | 331.5164            | 6.2333                  | 341.3656            | 6.2295                  | 133.8002            |
| 15    | 6.2773                  | -57.4899            | 6.2976                  | -104.0719           | 6.3019                  | -112.767            | 6.2806                  | -27.6343            |
| 16    | 6.3432                  | -333.8968           | 6.331                   | -121.5043           | 6.3352                  | -147.38             | 6.3484                  | -298.6678           |
| 17    | 6.3851                  | 85.762              | 6.4187                  | 163.4995            | 6.423                   | 146.5867            | 6.378                   | 144.7508            |
| 18    | 6.4272                  | -54.9288            | 6.4298                  | -284.977            | 6.4316                  | -236.892            | 6.425                   | 25.5331             |
| 19    | 6.4807                  | 54.9278             | 6.4502                  | -49.4182            | 6.4574                  | -62.3849            | 6.4875                  | 145.4138            |
| 20    | 6.5025                  | 136.3953            | 6.5001                  | 108.9017            | 6.5075                  | 96.8194             | 6.5233                  | -22.7732            |
| 21    | 6.5322                  | -16.9786            | 6.5134                  | -24.9772            | 6.5232                  | -22.925             | 6.5537                  | 16.7281             |
| 22    | 6.7217                  | -81.7126            | 6.6888                  | -141.4948           | 6.6914                  | -135.833            | 6.7156                  | -119.506            |
| 23    | 6.8246                  | -3.019              | 6.8253                  | 2.7951              | 6.8307                  | 1.9729              | 6.8255                  | 1.5233              |
| 24    | 6.8864                  | 46.5142             | 6.8616                  | -37.4693            | 6.8667                  | -36.4911            | 6.8665                  | 20.3054             |
| 25    | 6.9348                  | -56.9547            | 6.9375                  | -40.2693            | 6.9378                  | -40.9461            | 6.9343                  | -55.1902            |
| 26    | 6.966                   | 34.1833             | 6.9574                  | 20.495              | 6.9579                  | 20.7265             | 6.9692                  | 23.9623             |
| 27    | 6.9798                  | -20.4109            | 7.0013                  | -19.4456            | 7.0044                  | -21.4934            | 6.9808                  | -13.4206            |
| 28    | 7.0343                  | 4.9686              | 7.0361                  | -4.2731             | 7.0369                  | -3.3181             | 7.0395                  | 2.3689              |
| 29    | 7.0667                  | 8.3627              | 7.0522                  | 11.5941             | 7.0573                  | 16.1006             | 7.0693                  | -17.7001            |
| 30    | 7.0784                  | 10.6769             | 7.0806                  | 3.5216              | 7.0836                  | 6.4488              | 7.0807                  | 4.6775              |
| State | C5                      |                     | C6                      |                     | C7                      |                     | C8                      |                     |
|       | Excitation energies(eV) | Rotatory Strengths* |
| 1     | 4.0848                  | 23.5945             | 4.0851                  | 22.7967             | 4.0848                  | 22.8677             | 4.0844                  | 25.1991             |
| 2     | 4.533                   | -9.6098             | 4.5348                  | -11.6488            | 4.5348                  | -12.4499            | 4.5335                  | -8.3142             |
| 3     | 4.8121                  | -1.3875             | 4.81                    | 37.8924             | 4.8159                  | 25.9525             | 4.8161                  | 15.6902             |
| 4     | 5.0584                  | -37.6282            | 5.063                   | -8.164              | 5.0729                  | -17.2985            | 5.0698                  | -21.5812            |

|       |                         |                     |                         |                     |                         |                     |        |          |
|-------|-------------------------|---------------------|-------------------------|---------------------|-------------------------|---------------------|--------|----------|
| 5     | 5.1889                  | 5.9786              | 5.1888                  | 4.5888              | 5.1888                  | 4.6168              | 5.1888 | 6.0939   |
| 6     | 5.324                   | 10.9844             | 5.3258                  | 50.7271             | 5.3261                  | 43.4012             | 5.3228 | 15.2268  |
| 7     | 5.3581                  | 42.1637             | 5.3583                  | 46.5975             | 5.3585                  | 28.8628             | 5.3581 | 34.5536  |
| 8     | 5.4863                  | -129.7009           | 5.4897                  | 48.9202             | 5.5104                  | 67.0804             | 5.5068 | -82.1067 |
| 9     | 5.5421                  | 7.7399              | 5.5451                  | -8.7974             | 5.5453                  | -18.1039            | 5.5419 | -2.083   |
| 10    | 5.7904                  | -13.3515            | 5.7903                  | -12.3013            | 5.7904                  | -11.3727            | 5.7902 | -12.5235 |
| 11    | 6.0775                  | -77.3565            | 6.0777                  | -83.9464            | 6.0815                  | -64                 | 6.0809 | -80.5922 |
| 12    | 6.1047                  | 55.6308             | 6.1038                  | 80.592              | 6.1027                  | 93.0273             | 6.1034 | 45.0133  |
| 13    | 6.2985                  | -38.6447            | 6.297                   | -22.39              | 6.3025                  | -24.6072            | 6.3034 | 39.1149  |
| 14    | 6.3131                  | -158.905            | 6.313                   | -20.8145            | 6.3183                  | -43.9463            | 6.3191 | -186.809 |
| 15    | 6.4144                  | -133.4872           | 6.4064                  | -127.8528           | 6.3979                  | -100.476            | 6.4146 | -104.975 |
| 16    | 6.443                   | 227.8874            | 6.42                    | -124.0851           | 6.4212                  | -129.482            | 6.4341 | 70.3589  |
| 17    | 6.453                   | -69.1878            | 6.4495                  | 36.7388             | 6.4493                  | -15.108             | 6.4493 | 61.6388  |
| 18    | 6.5193                  | 165.3658            | 6.5277                  | 117.216             | 6.5229                  | 116.3311            | 6.5163 | 170.2942 |
| 19    | 6.6337                  | 58.9543             | 6.6787                  | 33.4642             | 6.6697                  | 40.7743             | 6.6261 | 60.3156  |
| 20    | 6.7406                  | 6.8175              | 6.7381                  | -28.7887            | 6.7452                  | -8.3972             | 6.7454 | -12.1398 |
| 21    | 6.7488                  | 69.583              | 6.7536                  | -4.7449             | 6.7809                  | -7.292              | 6.7778 | 88.4869  |
| 22    | 6.8227                  | -36.178             | 6.8229                  | 87.7724             | 6.8151                  | 86.6988             | 6.8152 | -95.788  |
| 23    | 6.9292                  | -3.4544             | 6.9268                  | -0.0737             | 6.9291                  | 0.3049              | 6.9328 | -5.1078  |
| 24    | 6.9482                  | -0.6536             | 6.9543                  | -6.6219             | 6.9667                  | -6.9928             | 6.9588 | -0.719   |
| 25    | 6.975                   | -54.7188            | 6.9759                  | -55.011             | 6.9758                  | -49.984             | 6.9746 | -53.0338 |
| 26    | 7.1205                  | 44.1397             | 7.1162                  | 44.2614             | 7.1219                  | 66.572              | 7.1296 | -9.9861  |
| 27    | 7.1427                  | -9.2554             | 7.1405                  | 9.422               | 7.1427                  | 37.0258             | 7.1466 | -29.5972 |
| 28    | 7.2197                  | 10.1179             | 7.2252                  | -6.8963             | 7.2252                  | -6.5433             | 7.219  | 10.81    |
| 29    | 7.2642                  | 39.5122             | 7.261                   | -34.5382            | 7.2644                  | -23.794             | 7.2696 | 33.3319  |
| 30    | 7.322                   | 12.0441             | 7.3262                  | -17.9735            | 7.3276                  | -18.7703            | 7.3194 | 20.8814  |
| State | C9                      |                     | C10                     |                     | C11                     |                     |        |          |
|       | Excitation energies(eV) | Rotatory Strengths* | Excitation energies(eV) | Rotatory Strengths* | Excitation energies(eV) | Rotatory Strengths* |        |          |
| 1     | 4.0844                  | 24.0096             | 4.0841                  | 25.251              | 4.0888                  | 2.0868              |        |          |
| 2     | 4.5339                  | -9.4403             | 4.5336                  | -8.6275             | 4.4545                  | -13.6654            |        |          |
| 3     | 4.814                   | 1.7084              | 4.8106                  | 11.9336             | 4.872                   | 11.7642             |        |          |
| 4     | 5.0641                  | -35.7391            | 5.0598                  | -25.1212            | 5.1353                  | 2.2038              |        |          |
| 5     | 5.1889                  | 5.9117              | 5.1889                  | 5.939               | 5.1705                  | 15.5782             |        |          |
| 6     | 5.3234                  | 15.2672             | 5.3225                  | 15.5277             | 5.3149                  | 0.1167              |        |          |
| 7     | 5.3583                  | 38.1827             | 5.3578                  | 38.9701             | 5.4482                  | 64.0269             |        |          |
| 8     | 5.4976                  | -122.784            | 5.4916                  | -110.173            | 5.531                   | -50.9819            |        |          |
| 9     | 5.5432                  | 1.3681              | 5.5427                  | 11.6511             | 5.6918                  | 57.7791             |        |          |
| 10    | 5.7904                  | -13.4886            | 5.7905                  | -12.8529            | 5.7249                  | 3.2878              |        |          |
| 11    | 6.0817                  | -72.2347            | 6.0787                  | -83.2625            | 5.8265                  | -19.2047            |        |          |
| 12    | 6.1094                  | 51.7527             | 6.1032                  | 43.4062             | 6.0777                  | -44.5291            |        |          |
| 13    | 6.3017                  | -81.1312            | 6.3014                  | 150.6083            | 6.1041                  | -13.0692            |        |          |
| 14    | 6.3189                  | -109.109            | 6.3174                  | -312.182            | 6.2444                  | -117.142            |        |          |

|    |        |          |        |          |        |          |
|----|--------|----------|--------|----------|--------|----------|
| 15 | 6.4156 | -129.246 | 6.4148 | -74.7862 | 6.3331 | 307.2264 |
| 16 | 6.4441 | 251.0435 | 6.439  | 109.7457 | 6.3926 | 344.455  |
| 17 | 6.4542 | -91.5705 | 6.4499 | 3.6297   | 6.4267 | 4.2213   |
| 18 | 6.5242 | 164.6088 | 6.5212 | 181.4572 | 6.4456 | -99.2268 |
| 19 | 6.6355 | 62.3925  | 6.6277 | 57.8065  | 6.4743 | -127.712 |
| 20 | 6.7448 | -11.4662 | 6.7427 | -13.4153 | 6.4833 | -35.9977 |
| 21 | 6.781  | 105.908  | 6.7877 | 50.2674  | 6.5338 | 101.9165 |
| 22 | 6.8534 | -57.4813 | 6.8618 | -49.6786 | 6.7127 | -243.186 |
| 23 | 6.9364 | -3.5576  | 6.9358 | -1.8764  | 6.7562 | -1.7355  |
| 24 | 6.9574 | -1.3464  | 6.9504 | -2.0511  | 6.7967 | -37.8164 |
| 25 | 6.9754 | -53.9282 | 6.9748 | -54.394  | 6.9297 | -19.2196 |
| 26 | 7.1264 | 45.0557  | 7.1322 | 2.4714   | 6.9481 | 5.1825   |
| 27 | 7.1458 | -6.6909  | 7.1505 | -34.9156 | 6.993  | 28.5313  |
| 28 | 7.2191 | 11.369   | 7.2192 | 11.877   | 7.0324 | -11.4928 |
| 29 | 7.2688 | 40.9707  | 7.2657 | 31.7637  | 7.0546 | -11.7473 |
| 30 | 7.3225 | 13.71    | 7.3242 | 13.6419  | 7.0916 | -16.6202 |
